# Supplementary material for: Antibiotic knowledge, attitudes and practices: new insights from cross-sectional rural health behaviour surveys in low-income and middle-income South-East Asia
Source: PubMed Central journal article supplement (PMC6707701; doi:10.1136/bmjopen-2018-028224), 2019-08-20
Supplement: bmjopen-2018-028224.draft_revisions.pdf [file bmjopen-2018-028224.draft_revisions.pdf]

# BMJ Open

BMJ Open is committed to open peer review. As part of this commitment we make the peer review history of every article we publish publicly available.

When an article is published we post the peer reviewers' comments and the authors' responses online. We also post the versions of the paper that were used during peer review. These are the versions that the peer review comments apply to.

The versions of the paper that follow are the versions that were submitted during the peer review process. They are not the versions of record or the final published versions. They should not be cited or distributed as the published version of this manuscript.

BMJ Open is an open access journal and the full, final, typeset and author-corrected version of record of the manuscript is available on our site with no access controls, subscription charges or pay-per-view fees (<http://bmjopen.bmj.com>).

If you have any questions on BMJ Open's open peer review process please email [info.bmjopen@bmj.com](mailto:info.bmjopen@bmj.com)

# BMJ Open

## Antibiotic Knowledge, Attitudes, and Practices: New Insights from Representative Social Surveys in Low- and Middle-Income Southeast Asia

|                               |                                                                                                                                                                                                                                                                                                                                                                                                                                                                                                                                                                                                                                                                                                                                                                                                                                                                                                                                                                                                                                                                                                                                                                                                                                                                                                                                                                                                                                                                                                                                                                                                                                                                                                                                                                                                                                                                                                                                                                                                                                                                                                                                                                                                     |
|-------------------------------|-----------------------------------------------------------------------------------------------------------------------------------------------------------------------------------------------------------------------------------------------------------------------------------------------------------------------------------------------------------------------------------------------------------------------------------------------------------------------------------------------------------------------------------------------------------------------------------------------------------------------------------------------------------------------------------------------------------------------------------------------------------------------------------------------------------------------------------------------------------------------------------------------------------------------------------------------------------------------------------------------------------------------------------------------------------------------------------------------------------------------------------------------------------------------------------------------------------------------------------------------------------------------------------------------------------------------------------------------------------------------------------------------------------------------------------------------------------------------------------------------------------------------------------------------------------------------------------------------------------------------------------------------------------------------------------------------------------------------------------------------------------------------------------------------------------------------------------------------------------------------------------------------------------------------------------------------------------------------------------------------------------------------------------------------------------------------------------------------------------------------------------------------------------------------------------------------------|
| Journal:                      | <i>BMJ Open</i>                                                                                                                                                                                                                                                                                                                                                                                                                                                                                                                                                                                                                                                                                                                                                                                                                                                                                                                                                                                                                                                                                                                                                                                                                                                                                                                                                                                                                                                                                                                                                                                                                                                                                                                                                                                                                                                                                                                                                                                                                                                                                                                                                                                     |
| Manuscript ID                 | bmjopen-2018-028224                                                                                                                                                                                                                                                                                                                                                                                                                                                                                                                                                                                                                                                                                                                                                                                                                                                                                                                                                                                                                                                                                                                                                                                                                                                                                                                                                                                                                                                                                                                                                                                                                                                                                                                                                                                                                                                                                                                                                                                                                                                                                                                                                                                 |
| Article Type:                 | Research                                                                                                                                                                                                                                                                                                                                                                                                                                                                                                                                                                                                                                                                                                                                                                                                                                                                                                                                                                                                                                                                                                                                                                                                                                                                                                                                                                                                                                                                                                                                                                                                                                                                                                                                                                                                                                                                                                                                                                                                                                                                                                                                                                                            |
| Date Submitted by the Author: | 04-Dec-2018                                                                                                                                                                                                                                                                                                                                                                                                                                                                                                                                                                                                                                                                                                                                                                                                                                                                                                                                                                                                                                                                                                                                                                                                                                                                                                                                                                                                                                                                                                                                                                                                                                                                                                                                                                                                                                                                                                                                                                                                                                                                                                                                                                                         |
| Complete List of Authors:     | <p>Haenssger, Marco; University of Oxford Centre for Tropical Medicine, Center for Tropical Medicine and Global Health; University of Warwick, School of Cross Faculty Studies</p> <p>Charoenboon, Nutcha; Mahidol Oxford Tropical Medicine Research Unit</p> <p>Zanello, Giacomo; University of Reading, School of Agriculture, Policy and Development; Leverhulme Centre for Integrative Research on Agriculture and Health</p> <p>Mayxay, Mayfong; Lao-Oxford-Mahosot Hospital-Wellcome Trust Research Unit; Faculty of Postgraduate Studies, University of Health Sciences</p> <p>Reed-Tsochas, Felix; University of Oxford Said Business School, Said Business School; University of Oxford, Oxford Martin School</p> <p>Lubell, Yoel ; University of Oxford Centre for Tropical Medicine, Center for Tropical Medicine and Global Health; Mahidol Oxford Tropical Medicine Research Unit</p> <p>Wertheim, Heiman; Radbuod University, Medical Microbiology Department; Oxford University Clinical Research Unit</p> <p>Lienert, Jeffrey; University of Oxford Said Business School, ; National Human Genome Research Institute,</p> <p>Xayavong, Thippaphone; University for Peace, Department of Peace and Conflict Studies; Ateneo de Manila University, Department of Political Science</p> <p>Khine Zaw, Yuzana; London School of Hygiene and Tropical Medicine, Department of Global Health and Development</p> <p>Thepkhamkong, Amphayvone; Lao-Oxford-Mahosot Hospital-Wellcome Trust Research Unit</p> <p>Sithongdeng, Nicksan; Lao-Oxford-Mahosot Hospital-Wellcome Trust Research Unit</p> <p>Khamsoukthavong, Nid; Lao-Oxford-Mahosot Hospital-Wellcome Trust Research Unit</p> <p>Phanthavong, Chanthasone; Lao-Oxford-Mahosot Hospital-Wellcome Trust Research Unit</p> <p>Boualaiseng, Somsanith; Lao-Oxford-Mahosot Hospital-Wellcome Trust Research Unit</p> <p>Vongsavang, Souksakhone; Lao-Oxford-Mahosot Hospital-Wellcome Trust Research Unit</p> <p>Wibunjak, Kanokporn; Mahidol Oxford Tropical Medicine Research Unit</p> <p>Chai-in, Poowadon; Mahidol Oxford Tropical Medicine Research Unit, Thavethanutthanawin, Patthanawin; Mahidol Oxford Tropical Medicine</p> |

|           |                                                                                                                                                                                                                                                                                                                                                                                                                                                                                                                                                                                                                                                                                                                                                                                                                                                                                                                                                                |
|-----------|----------------------------------------------------------------------------------------------------------------------------------------------------------------------------------------------------------------------------------------------------------------------------------------------------------------------------------------------------------------------------------------------------------------------------------------------------------------------------------------------------------------------------------------------------------------------------------------------------------------------------------------------------------------------------------------------------------------------------------------------------------------------------------------------------------------------------------------------------------------------------------------------------------------------------------------------------------------|
|           | <p>Research Unit<br/>Althaus, Thomas; University of Oxford Centre for Tropical Medicine,<br/>Center for Tropical Medicine and Global Health; Mahidol Oxford Tropical<br/>Medicine Research Unit<br/>Greer, Rachel; Mahidol Oxford Tropical Medicine Research Unit, Faculty<br/>of Tropical Medicine Mahidol University; Chiangrai Regional Hospital,<br/>Chiangrai Clinical Research Unit<br/>Nedsuwan, Supalert; Chiangrai Regional Hospital, Primary Care<br/>Department<br/>Wangrangsimakul, Tri; Mahidol Oxford Tropical Medicine Research Unit;<br/>Chiangrai Regional Hospital, Chiangrai Clinical Research Unit<br/>Limmathurotsakul, Direk; Mahidol Oxford Tropical Medicine Research<br/>Unit,<br/>Elliott, Elizabeth; University College London, UCL Anthropology; Institut<br/>de recherche pour le développement<br/>Ariana, Proochista; University of Oxford Centre for Tropical Medicine,<br/>Center for Tropical Medicine and Global Health</p> |
| Keywords: | Health policy < HEALTH SERVICES ADMINISTRATION & MANAGEMENT,<br>TROPICAL MEDICINE, PUBLIC HEALTH                                                                                                                                                                                                                                                                                                                                                                                                                                                                                                                                                                                                                                                                                                                                                                                                                                                               |
|           |                                                                                                                                                                                                                                                                                                                                                                                                                                                                                                                                                                                                                                                                                                                                                                                                                                                                                                                                                                |

SCHOLARONE™  
Manuscripts

# 1 Antibiotic Knowledge, Attitudes, and Practices: New Insights from Representative Social 2 Surveys in Low- and Middle-Income Southeast Asia

3 **Marco J HAENSSGEN** <sup>a, b, c, d</sup>, **Nutchha CHAROENBOON** <sup>d</sup>, **Giacomo ZANELLO** <sup>e, f</sup>, **Mayfong**  
4 **MAYXAY** <sup>a, g, h</sup>, **Felix REED-TSOCHAS** <sup>b, c, i</sup>, **Yoel LUBELL** <sup>a, d</sup>, **Heiman FL WERTHEIM** <sup>j, k</sup>,  
5 **Jeffrey LIENERT** <sup>b, c, l</sup>, **Thippaphone XAYAVONG** <sup>m, n</sup>, **Yuzana KHINE ZAW** <sup>o</sup>, **Amphayvone**  
6 **THEPKHAMKONG** <sup>g</sup>, **Nicksan SITHONGDENG** <sup>g</sup>, **Nid KHAMSOUKTHAVONG** <sup>g</sup>,  
7 **Chanthasone PHANTHAVONG** <sup>g</sup>, **Somsanith BOUALAISENG** <sup>g</sup>, **Souksakhone**  
8 **VONGSAVANG** <sup>g</sup>, **Kanokporn WIBUNJAK** <sup>d</sup>, **Poowadon CHAI-IN** <sup>d</sup>, **Patthan**  
9 **THAVETHANUTTHANAWIN** <sup>d</sup>, **Thomas ALTHAUS** <sup>a, d</sup>, **Rachel C GREER** <sup>a, d</sup>, **Supalert**  
10 **NEDSUWAN** <sup>p</sup>, **Tri WANGRANGSIMAKUL** <sup>a, d</sup>, **Direk LIMMATHUROTSAKUL** <sup>d</sup>, **Elizabeth**  
11 **ELLIOTT** <sup>q, r</sup>, **Proochista ARIANA** <sup>a</sup>

12 <sup>a</sup>. Centre for Tropical Medicine and Global Health, Nuffield Department of Clinical Medicine, University of Oxford,  
13 Oxford, UK

14 <sup>b</sup>. CABDyN Complexity Centre, Saïd Business School, University of Oxford, Oxford, UK

15 <sup>c</sup>. Green Templeton College, Oxford, UK

16 <sup>d</sup>. Mahidol Oxford Tropical Medicine Research Unit, Faculty of Tropical Medicine, Mahidol University, Bangkok,  
17 Thailand

18 <sup>e</sup>. School of Agriculture, Policy and Development, University of Reading, Reading, UK

19 <sup>f</sup>. Leverhulme Centre for Integrative Research on Agriculture and Health, London, UK

20 <sup>g</sup>. Lao Oxford Mahosot Wellcome Trust Research Unit (LOMWRU), Mahidol Oxford Tropical Medicine Research Unit  
21 (MORU), Faculty of Tropical Medicine, Mahidol University, Bangkok, Thailand

22 <sup>h</sup>. Institute of Research and Education Development, University of Health Sciences, Vientiane, Lao PDR

23 <sup>i</sup>. Oxford Martin School, University of Oxford, Oxford, UK

24 <sup>j</sup>. Oxford University Clinical Research Unit (OUCRU), Ho Chi Minh City, Viet Nam

25 <sup>k</sup>. Medical Microbiology Department, Radboudumc, Nijmegen, Netherlands

26 <sup>l</sup>. National Human Genome Research Institute, National Institutes of Health, Bethesda, MD, US

27 <sup>m</sup>. Department of Peace and Conflict Studies, University for Peace, Costa Rica

28 <sup>n</sup>. Department of Political Science, School of Social Science, Ateneo de Manila University, Manila, Philippines

29 <sup>o</sup>. Department of Global Health and Development, London School of Hygiene & Tropical Medicine, London, UK

30 <sup>p</sup>. Primary Care Department, Chiangrai Prachanukroh Hospital, Chiang Rai, Thailand

31 <sup>q</sup>. UCL Anthropology, University College London, London, UK

32 <sup>r</sup>. Institut de recherche pour le développement, Vientiane, Lao PDR

33  
34 Corresponding author: Marco J HAENSSGEN, Centre for Tropical Medicine and Global Health,  
35 Nuffield Department of Medicine, University of Oxford, Old Road Campus, Roosevelt Drive,  
36 Oxford OX3 7FZ, UK; phone: +66(0)951906543; email: marco.haenssngen@warwick.ac.uk

## 37 WORD COUNT

38 3,544 (main text, excl. references, figures and tables)

## 39 KEYWORDS

40 Antimicrobial resistance, antibiotics, awareness, treatment-seeking behaviour, survey, social sciences,  
41 development studies, interdisciplinary research, Thailand, Lao PDR

1  
2  
3 42 **ABSTRACT**  
4  
5

6 43 **Introduction:** Low- and middle-income countries (LMICs) are crucial in the global response to  
7  
8 44 antimicrobial resistance (AMR), but diverse health systems, healthcare practices, and cultural  
9  
10 45 conceptions of medicine can complicate global education and awareness-raising campaigns. The social  
11  
12 46 sciences can help understand LMIC contexts but remain underrepresented in AMR research.

13  
14  
15 47 **Objective:** To contribute to the social understanding of AMR-related population behaviour in LMICs.  
16  
17

18 48 **Design:** Observational study: cross-sectional rural health behaviour survey, representative on the  
19  
20 49 population level.  
21  
22

23 50 **Setting:** General rural population in Chiang Rai (Thailand) and Salavan (Lao PDR), surveyed between  
24  
25 51 November 2017 and May 2018.  
26  
27

28 52 **Participants:** 2141 adult members ( $\geq 18$  years) of the general rural population, representing 712,000  
29  
30 53 villagers.  
31  
32

33 54 **Outcome measures:** Antibiotic-related knowledge, attitudes, and practices across sites and healthcare  
34  
35 55 access channels.  
36  
37

38 56 **Findings:** Villagers were aware of antibiotics (Chiang Rai: 95.7%; Salavan: 86.4%;  $p < 0.001$ ) and drug  
39  
40 57 resistance (Chiang Rai: 74.8%; Salavan: 62.5%;  $p < 0.001$ ), but the usage of technical concepts for  
41  
42 58 antibiotics was dwarfed by local expressions like “anti-inflammatory medicine” in Chiang Rai (87.6%;  
43  
44 59 95% confidence interval: 84.9–90.0) and “*ampi*” in Salavan (75.6%; 95% CI: 71.4–79.4). Attitudes  
45  
46 60 against over-the-counter antibiotics were not linked to lower antibiotic consumption from informal  
47  
48 61 providers (Chiang Rai:  $p = 0.245$ ; Salavan:  $p = 0.695$ ), but to disproportionately high antibiotic  
49  
50 62 consumption from public healthcare providers in Salavan ( $p < 0.001$ ; Chiang Rai:  $p = 0.374$ ).  
51  
52

53  
54  
55 63 **Conclusions:** Locally specific conceptions and counter-intuitive practices around antimicrobials can  
56  
57 64 complicate AMR communication efforts and entail unforeseen consequences. Overcoming  
58  
59 65 “knowledge deficits” alone will therefore be insufficient for global AMR behaviour change. We call  
60

66 for an expansion of behavioural AMR strategies towards “AMR-sensitive interventions” that address  
67 context-specific upstream drivers of antimicrobial use (e.g. unemployment insurance) and complement  
68 education and awareness campaigns.

69 **Registration:** clinicaltrials.gov identifier NCT03241316

## 70 **STRENGTH AND LIMITATIONS OF THIS STUDY**

- 71 • Provincial-level representative survey using three-stage stratified cluster random sampling  
72 design
- 73 • Survey based on preceding qualitative research on antibiotic use in Southeast Asia
- 74 • Inclusion of general population enables insights into formal and informal healthcare utilisation
- 75 • Cross-sectional analysis of rural health behaviours excludes seasonal change and urban settings
- 76 • Two-month recall period enabled greater inclusion but may bias responses towards better  
77 educated population groups

## 78 **MAIN TEXT**

### 79 **Introduction**

80 Antimicrobial resistance (AMR) threatens modern medicine by rendering antimicrobial drugs  
81 inefficacious. Multi-faceted global strategies target human, animal, and plant health alongside the  
82 environment and food production and safety to respond to this “superbug crisis” [1]. In human health,  
83 supply-sided responses include incentives to stimulate drug research and development; action on the  
84 demand side intends to limit and target antimicrobial use for instance through new diagnostic  
85 technologies, public health intervention to improve vaccine coverage and hygiene, and other  
86 antimicrobial stewardship activities like restricted dispensing of antibiotics and prescriber feedback  
87 [2-4]. As an interdisciplinary field, the social dimensions of the problem are being recognised in global

1  
2  
3 88 AMR policy, which are typically addressed via education and awareness-raising activities aimed at  
4  
5  
6 89 governmental staff, healthcare workers, and the general public [2].  
7

8 90 Low- and middle-income countries (LMICs) play an important role in the global response to AMR.  
9  
10  
11 91 However, diverse health systems, healthcare practices, and conceptions related to the use of  
12  
13 92 antimicrobials require social sciences research to understand local contexts and the complexity of  
14  
15 93 human behaviour in LMIC settings. For example, with a focus on the health behaviour of the general  
16  
17 94 public, the anthropological literature suggests that social factors like precarity and discrimination can  
18  
19  
20 95 influence medicine use independently of awareness [5]; psychology and behavioural economics  
21  
22 96 indicate that health decision-making processes interact with the social environment and contextual  
23  
24 97 change to create adverse behavioural biases [6 7]; and communication studies research points at  
25  
26  
27 98 interferences between awareness campaigns and local contexts that can entail unforeseen  
28  
29 99 consequences like politicisation, stigmatisation, or accidentally encouraging the behaviours they try to  
30  
31 100 discourage [8 9]. Such examples underline the possible contribution of the social sciences to AMR,  
32  
33  
34 101 but they remain persistently underrepresented with less than 2% of all AMR-related publications (see  
35  
36 102 Appendix Figure A1 for a time trend) [10]. This is problematic for at least three reasons:  
37

- 38  
39 103
- 40 • We currently have an insufficient social science knowledge base for behavioural interventions  
41 104 in AMR—a global health priority that has attracted more than £600 million of AMR  
42  
43 105 expenditure and future commitments [11-13].  
44
  - 45 • The recent withdrawal of large pharmaceutical companies from antimicrobial research and  
46 106 development [14] threatens the AMR supply-side response, requiring yet more effective action  
47  
48 107 on the demand side.  
49
  - 50 108 • More extensive social sciences work can yield novel social innovations as a benefit of  
51  
52  
53 109 disciplinary diversification [15].  
54  
55 110
- 56  
57

58 111 The objective of this paper was to contribute to the understanding of LMIC contexts and AMR-related  
59  
60 112 human behaviour from a social science perspective, for which we explored antibiotic-related

1  
2  
3 113 knowledge, attitudes, and practices of the general population in two LMICs. We report findings from  
4  
5  
6 114 a provincial-level representative survey of rural health behaviours as part of the interdisciplinary  
7  
8 115 “Antibiotics and Activity Spaces” project [16].<sup>i</sup> We implemented the study in Southeast Asia, which  
9  
10 116 is characterised as a region “at high risk of the emergence and spread of antibiotic resistance in  
11  
12 117 humans” [17]. With more than 9% of global air passengers and more than 110 million international  
13  
14  
15 118 tourist arrivals in 2016 [18], the potential of cross-border spread of drug-resistant microbes also gives  
16  
17 119 AMR research in Southeast Asia a global relevance—as the recent importation of multi-drug-resistant  
18  
19 120 *Neisseria gonorrhoeae* to the UK showed [19]. Within Southeast Asia, Thailand and Lao PDR lent  
20  
21  
22 121 themselves for a comparative analysis because of their physical and cultural proximity, and Chiang  
23  
24 122 Rai (Thailand) and Salavan (Lao PDR) in particular had similarly varied terrain and large and  
25  
26 123 ethnically diverse rural populations. The main field site differences were Thailand’s more advanced  
27  
28  
29 124 economic and health system context and more established AMR action plan [20].  
30  
31  
32

## 33 125 **Methods**

### 34 35 36 126 *Research Design*

37  
38 127 Our study design was a three-stage stratified cluster random survey (Figure 1): Following the  
39  
40  
41 128 purposive selection of five districts per province, we selected a random sample of 30 primary sampling  
42  
43 129 units (PSUs) per province (six per district), stratified by distance to the nearest district headquarters.  
44  
45 130 The second stage was the selection of an interval sample of 5% but at least 30 of all households in the  
46  
47  
48 131 PSU, which we approximated as residential structures on satellite maps [21]. The third and final stage  
49  
50 132 was the random selection of available household members (one for every five members). At each  
51  
52 133 sampling stage, we substituted unavailable selections (1) with a stratified random replacement for the  
53  
54  
55

---

56  
57  
58 <sup>i</sup> This paper contributes to the project’s research question, “*What are the manifestations and determinants of problematic antibiotic use*  
59 *in patients’ healthcare-seeking pathways?*” [16].  
60



1  
2  
3 134 random PSU sample, (2) with the nearest available neighbour for the interval sample of households,  
4  
5  
6 135 and (3) with a simple random replacement for the random household member sample (replacement  
7  
8 136 numbers indicated in Figure 1). The cross-sectional data collection took place between November 2017  
9  
10 137 and May 2018.

11  
12  
13 138  
14  
15  
16 139 [Insert Figure 1 about here]

17  
18  
19 140 Figure 1. Survey sites and multi-stage sampling process.

20  
21 141 Source: Authors, adapted from Wikimedia Commons [22].

22 142 Notes: Unavailable selections at each sampling stage were substituted with a random replacement for the random samples of PSUs and  
23 143 household members, and with the nearest available neighbour for the interval sample of households. One PSU could contain more than  
24 144 one administrative village; if the first-chosen village contained less than 600 houses, then adjacent villages would be included.  
25 145 PSU=Primary Sampling Unit.

26 146  
27  
28  
29 147 *Study Population*

30  
31 148 Our study population was the general adult population of rural Chiang Rai and Salavan (522,000 in  
32  
33  
34 149 Chiang Rai and 190,000 in Salavan as per census data), from whom we drew a representative sample  
35  
36 150 of 1158 villagers in Chiang Rai and 983 in Salavan. We did not specifically sample patients, but we  
37  
38 151 recorded any acute illness episode or accident-related injury if one occurred within the last two months  
39  
40 152 of the interview, both for the respondents and any children under their supervision.

41  
42  
43 153  
44  
45  
46 154 *Patient and Public Involvement*

47  
48  
49 155 This study did not sample patients but only adult members of the general public. The survey instrument  
50  
51 156 was based on preceding qualitative research in Southeast Asia [24 25], in which patients, healthcare  
52  
53  
54 157 providers, and healthy adults participated. This preceding research prompted the research interest in  
55  
56 158 treatment-seeking behaviours and conceptions of medicine and illness among the broader rural  
57  
58 159 population in Southeast Asia. We will disseminate our findings through outreach to policy stakeholders

59  
60

1  
2  
3 160 and local development organisations, through public engagement activities like the World Antibiotic  
4  
5 161 Awareness Week, and through our local network of collaborators in the field sites.  
6  
7

8 162  
9  
10  
11 163 *Data Collection*  
12

13  
14 164 Our survey instrument was a 45-minute face-to-face questionnaire (see Supplemental Material). It was  
15  
16 165 administered on tablets running the survey software SurveyCTO (Dobility Inc., Cambridge, MA,  
17  
18 166 USA) by locally recruited survey teams comprising seven enumerators and two survey supervisors per  
19  
20  
21 167 country, who received five days of full-time classroom and field training. The original English  
22  
23 168 questionnaire was translated into Thai and Lao by the research team, and local translators were  
24  
25 169 recruited for the 228 instances where we encountered language barriers in the village. The  
26  
27  
28 170 questionnaires were piloted in rural Chiang Rai and Salavan, with 50 cognitive interviews supporting  
29  
30 171 the questionnaire development and revision as well as the contextualisation of the survey data (not  
31  
32 172 reported here; interview guide in Supplemental Material) [23].  
33

34  
35 173 The questionnaire covered basic demographic and socio-economic information, antibiotic-related  
36  
37 174 knowledge and attitudes, and treatment-seeking behaviour during acute illnesses and accident-related  
38  
39  
40 175 injuries. When measuring people's awareness of antibiotics, we could not simply ask villagers whether  
41  
42 176 they knew what "antibiotics" are, considering that (a) a variety of local terms related to antibiotics, (b)  
43  
44 177 people may be familiar with specific antibiotic brands but not aware of their antibiotic attributes, and  
45  
46  
47 178 (c) the understanding of technical language was uncommon (see Results section for evidence on this  
48  
49 179 point). We therefore asked respondents first if they recognised images of common antibiotics in the  
50  
51 180 field site.<sup>ii</sup> In the 108/1974 (5.5%) of cases where the respondents did not mention "antibiotics," its  
52  
53  
54 181 colloquial equivalents, or the names of specific antibiotic types, we asked them if they had heard about  
55

56  
57  
58 <sup>ii</sup> Three images on the survey tablet in Chiang Rai and a bag with seven local antibiotics in Salavan (considering the wider range of  
59  
60 terms and medicines in circulation). See questionnaire in the Supplementary Material.

1  
2  
3 182 “anti-inflammatory drugs” (“ยาแก้อักเสบ” or “yah kae ak seb”) in Thai and “germ resisters”  
4  
5  
6 183 (“ຢາຕ້ານເຊື້ອ” or “yah dtan suea”) in Lao as common local notions of “antibiotics.” We next  
7  
8  
9  
10 184 asked about the purposes for which the respondent would use these antibiotics, which served as  
11  
12 185 information alongside inputs from local pharmacists to triangulate in later parts of the questionnaire  
13  
14 186 whether the respondent received antibiotics during an illness. However, 752/2986 (25.2%) medicine  
15  
16 187 use episodes could not be confirmed as either antibiotic or non-antibiotic (e.g. “white powder” or  
17  
18  
19 188 “green capsule”). We included these uncertain cases as “potential” antibiotic use episodes to capture  
20  
21 189 behaviour more comprehensively.  
22  
23

#### 24 190 25 26 191 *Data Analysis*

27  
28  
29 192 In order to inform the current global health agenda on antibiotic education and awareness raising, we  
30  
31  
32 193 used descriptive statistical analysis to describe the patterns of knowledge, attitudes, and practices  
33  
34 194 across the two field sites, using the variables described in Appendix Table A2. If the common policy  
35  
36 195 narrative holds, then we would expect rural populations in Chiang Rai and Salavan to exhibit:  
37  
38

- 39 196 • low degrees of antibiotic-related knowledge,
- 40  
41 197 • generally high levels of antibiotic consumption especially from informal sources (e.g.  
42  
43  
44 198 unregistered shops selling antibiotics over the counter), and
- 45  
46 199 • lower general antibiotic use and a higher share of supervised antibiotic use from formal  
47  
48 200 healthcare providers among people whose attitudes correspond to awareness-raising messages  
49  
50  
51 201 for AMR (based on FAO/OIE/WHO material, see Appendix Table A2) [1].  
52

53 202 We stratified and compared the samples by field site and estimated provincially representative patterns  
54  
55  
56 203 using post-stratification weights based on census data (considering village size and district-specific  
57  
58 204 age and gender composition) and adjusting the results for the multi-stage sampling design with the  
59  
60

1  
2  
3 205 help of the SVY suite of commands in Stata 15 (StataCorp, College Station, TX, USA). We separately  
4  
5 206 analysed the full sample and the subset of respondents who reported a recent illness, whereby we tested  
6  
7  
8 207 differences in knowledge, attitudes, and behaviours across sites and across antibiotic access channels  
9  
10 208 with  $X^2$  tests for binary and Wilcoxon rank-sum tests (two-sided) for non-normally distributed  
11  
12 209 variables. We considered p values below 0.05 statistically significant.  
13  
14  
15  
16

## 17 210 **Results**

18  
19  
20 211 Representative statistical data of Chiang Rai and Salavan are presented in Table 1. In terms of socio-  
21  
22 212 demographic characteristics of the rural population in the two provinces, Chiang Rai villagers were  
23  
24 213 older on average ( $p<0.001$ ), tended to have received more formal education ( $p<0.001$ ), and had higher  
25  
26 214 asset wealth ( $p<0.001$ ), while fewer Salavan villagers belonged to the local majority ethnicity  
27  
28  
29 215 ( $p=0.030$ ).  
30

31  
32 216 Respondents' recognition of antibiotics in Chiang Rai was significantly higher than in Salavan, but  
33  
34 217 overall high in both sites (Chiang Rai: 95.7%; Salavan: 86.4%;  $p<0.001$ ). Recognition of the phrase  
35  
36 218 "drug resistance" was high as well, whereby 74.8% recognised the term in Chiang Rai and 62.5%  
37  
38 219 ( $p<0.001$ ) recognised either of the two common variations in Salavan. Table 1 further indicates that  
39  
40  
41 220 antibiotic-related knowledge and attitudes aligned more closely with FAO/OIE/WHO messages in  
42  
43 221 Chiang Rai than in Salavan ( $p<0.001$  for all four questions). Across the four questions, respondents in  
44  
45 222 rural Chiang Rai had an average answer score of 1.8 as opposed to rural Salavan with 0.7 ( $p<0.001$ ).  
46  
47

48 223 Figure 2, Panel a demonstrates the ways in which people related to "antibiotics." In Chiang Rai,  
49  
50 224 respondents commonly referred to antibiotics as "anti-inflammatory drug," representing 87.6% of all  
51  
52  
53 225 responses ("ยาแก้อักเสบ" or "yah kae ak seb;" a vernacular notion specific to antibiotics).<sup>iii</sup> Only 7.2%  
54  
55  
56  
57

---

58  
59 <sup>iii</sup> Actual anti-inflammatory medicine like ibuprofen would usually be referred to by its brand names.  
60

1  
2  
3 226 used the official term for “antibiotic” (“ยาปฏิชีวนะ” or “yah pa ti chee wa na”) alongside “germ killer”  
4  
5  
6 227 and specific antibiotic types like “corlam” (chloramphenicol; 4.6%). In rural Salavan, a larger portion  
7  
8  
9 228 of 38.6% used the official term for antibiotics (“ຢາຕ້ານເຊື້ອ” or “yah dtan suea,” translated as  
10  
11  
12 229 “germ resister”), but Salavan respondents were also more likely to use various colloquial expressions  
13  
14 230 for specific types of antibiotics, like “Ampi” with 75.6% and “Amok” with 35.3%.

17 231

18

19

20 232

21

22

23

24

25

26

27

28

29

30

31

32

33

34

35

36

37

38

39

40

41

42

43

44

45

46

47

48

49

50

51

52

53

54

55

56

57

58

59

60

Table 1. Provincial-level estimates of rural surveys in Chiang Rai and Salavan.

|                                                      | Chiang Rai        | Salavan           | p value |
|------------------------------------------------------|-------------------|-------------------|---------|
| <b>Demographics</b>                                  |                   |                   |         |
| Number                                               | 1158              | 983               | ..      |
| Female <sup>a</sup>                                  | 51.3% (44.9–57.6) | 50.9% (47.0–54.9) | 0.927   |
| Age <sup>a</sup>                                     | 46 (13)           | 37 (20)           | <0.001  |
| Education (years)                                    | 6.3 (4.5)         | 4.4 (5.5)         | <0.001  |
| Speaking Thai / Lao                                  | 92.4% (89.9–94.2) | 93.6% (91.9–94.9) | 0.348   |
| Wealth index                                         | 0.7 (0.1)         | 0.4 (0.2)         | <0.001  |
| Buddhist religion                                    | 81.9% (77.4–85.7) | 67.5% (61.7–72.9) | <0.001  |
| Thai/Lao nationality                                 | 95.0% (93.1–96.4) | 98.8% (97.7–99.4) | <0.001  |
| Majority ethnic group (Thai/Lao Loum)                | 65.2% (59.6–70.4) | 56.2% (49.9–62.2) | 0.030   |
| <b>Antibiotic knowledge / attitudes</b>              |                   |                   |         |
| Number                                               | 1158              | 983               | ..      |
| Aware of antibiotics                                 | 95.7% (94.0–96.9) | 86.4% (83.6–88.7) | <0.001  |
| Aware of drug resistance <sup>b</sup>                | 74.8% (71.1–78.2) | 62.5% (58.1–66.7) | <0.001  |
| Would not buy antibiotics over the counter           | 57.0% (52.7–61.1) | 27.7% (24.6–31.0) | <0.001  |
| Prefers antibiotics over alternatives                | 61.8% (57.9–65.5) | 24.8% (21.1–29.0) | <0.001  |
| Does not keep antibiotics for future use             | 57.1% (53.1–61.0) | 16.2% (13.2–19.8) | <0.001  |
| Knows that antibiotic resistance can spread          | 9.1% (7.2–11.5)   | 3.4% (2.1–5.5)    | <0.001  |
| Answer score (0 to 4)                                | 1.8 (0.9)         | 0.7 (1.0)         | <0.001  |
| <b>Illness episodes<sup>c</sup></b>                  |                   |                   |         |
| Number                                               | 608               | 356               | ..      |
| Self-rated severity (1=mild, 2=medium, 3=severe)     | 1.6 (0.7)         | 1.8 (0.8)         | 0.015   |
| Duration of illness episode (days)                   | 6.8 (7.1)         | 6.5 (7.9)         | 0.413   |
| <b>Treatment-seeking behaviour<sup>c</sup></b>       |                   |                   |         |
| Number                                               | 608               | 356               | ..      |
| Public healthcare provider                           | 29.0% (24.8–33.7) | 44.8% (37.8–52.0) | <0.001  |
| Private healthcare provider                          | 25.0% (20.5–30.1) | 23.8% (17.8–31.0) | 0.777   |
| Informal healthcare provider                         | 8.5% (6.1–11.8)   | 6.9% (3.9–11.8)   | 0.504   |
| Care from family or self-care                        | 88.8% (84.3–92.2) | 93.2% (88.3–96.1) | 0.133   |
| Other types of healthcare access                     | 0.3% (0.1–1.4)    | 6.0% (2.8–12.3)   | <0.001  |
| <b>Medicine use episodes per illness<sup>c</sup></b> |                   |                   |         |
| Number                                               | 608               | 356               | ..      |
| Medicine use episodes                                | 2.2 (1.7)         | 2.5 (2.3)         | 0.050   |
| Non-antibiotic medicine use episodes                 | 1.6 (1.2)         | 1.3 (1.4)         | 0.048   |
| Antibiotic use episodes                              | 0.2 (0.5)         | 0.4 (0.7)         | <0.001  |
| Potential antibiotic use episodes                    | 0.4 (0.9)         | 0.9 (1.8)         | <0.001  |

|                                                                      |           |           |       |
|----------------------------------------------------------------------|-----------|-----------|-------|
| Antibiotic use episodes per illness from informal sources            | 0.0 (0.2) | 0.1 (0.4) | 0.092 |
| Antibiotic / potential antibiotic use episodes from informal sources | 0.1 (0.3) | 0.2 (0.7) | 0.020 |

Source: Authors’ analysis of survey data.

Notes: Population-weighted statistics, accounting for complex survey design. Not applicable categories indicated with “..” Group comparison using X2 tests for binary and Wilcoxon rank-sum tests for non-normally distributed variables.

- a. Due to population weighting, samples reflect the same sex and age profiles as the respective censuses.
- b. Comparing Thai “due yah” with the combined Lao “due yah” and “lueng yah.”
- c. Completed illnesses experienced by respondent or child under their supervision, excluding incomplete episodes.

Reported purposes of antibiotic use were yet more varied and are displayed in Figure 2, Panel b. The most common use was the treatment of external wounds (Chiang Rai: 33.7%; Salavan: 44.4%; p<0.001). Other frequently reported uses in Salavan included coughs (30.5%; Chiang Rai: 10.9%; p<0.001) and fevers (30.5%; Chiang Rai: 8.3%; p<0.001). Thai respondents further indicated common use of antibiotics for sore throats (Chiang Rai: 36.3%; Salavan: 28.9%; p=0.016) and for the more general idea of an “inflammation” of the body (Chiang Rai: 23.5%; Salavan: 18.6%; p=0.083). Thai respondents would also more often limit their use to whatever a healthcare worker would recommend (Chiang Rai: 9.5%; Salavan: 5.4%; p=0.037), while 2.3% indicated that they would treat their plants or animals (dogs and chickens) with antibiotics (Salavan: 0.1%; p<0.001). Using antibiotics to treat infections or to fight bacteria and germs was only mentioned by a small minority of the rural populations (Chiang Rai: 2.4%; Salavan: 2.8%; p=0.243).

[Insert Figure 2 about here]

Figure 2. Common names and purposes for antibiotics.

Source: Authors’ analysis of survey data.

Notes: Only including respondents who indicated that they had seen the presented medicine (i.e. common antibiotics) before. Chiang Rai: n = 1076; Salavan: n = 775. Population-weighted statistics, accounting for complex survey design. Multiple response permitted. Error bars indicate 95% confidence interval.

Table 2 indicates that—though people typically recognised the term “drug resistance”—the responses to the question “*What do you think is drug resistance?*” only rarely corresponded to clinical definitions, and the coexistence of two common translations of the term in Lao PDR complicated the picture

262 further. In Chiang Rai, 10.6% of the interpretations related to antibiotics and/or drug-resistant germs.  
 263 Lao respondents linked the official term “*due yah*” to clinical definitions in 7.7% of all interpretations,  
 264 and the colloquial term “*lueng yah*” in 9.6% of all interpretations. Not unlike other high- and low-  
 265 income countries [26], drug resistance was typically interpreted as a growing tolerance of the body  
 266 towards medicine as a result of repeated use (not limited to antibiotics). Other common interpretations  
 267 in Chiang Rai were the incorrect or erratic use of medicine (12.5%), and an understanding of drug  
 268 resistance as side-effects of or allergic reactions to medicine in general (4.2%). In Salavan, “*due yah*”  
 269 was often interpreted as a refusal or “stubbornness” to take medicine (21.8%; possibly due to its literal  
 270 translation into “*stubborn [to the effect of] medicine*”), while its vernacular equivalent “*lueng yah*”  
 271 was often interpreted in the opposite way as a psychological dependence or addiction to medicine  
 272 (24.9%).

Table 2. Awareness and interpretations of “drug resistance.”

|                                  |                                                       | Chiang Rai                  |                                                       | Salavan                    |                                                                                     |
|----------------------------------|-------------------------------------------------------|-----------------------------|-------------------------------------------------------|----------------------------|-------------------------------------------------------------------------------------|
|                                  |                                                       | “ <i>due yah</i> ”          | “ <i>due yah</i> ”                                    | “ <i>due yah</i> ”         | “ <i>lueng yah</i> ”                                                                |
| Awareness among rural population |                                                       | 72.9%<br>(67.4–77.8)        | 27.1%<br>(22.2–32.6)                                  | 58.8%<br>(54.6–63.0)       |                                                                                     |
| <b>Top 5 interpretations</b>     |                                                       |                             |                                                       |                            |                                                                                     |
| Rank 1                           | Body becomes tolerant to medicine                     | 54.1%<br>(49.3–58.9)        | Body becomes tolerant to medicine                     | 38.1%<br>(30.4–46.4)       | Body becomes tolerant to medicine<br>50.9%<br>(44.7–57.1)                           |
| Rank 2                           | Taking medicine incorrectly                           | 12.5%<br>(10.2–15.3)        | Patient is “stubborn,” refuses medicine               | 21.8%<br>(14.8–31.0)       | Addicted to / preference for medicine<br>24.9%<br>(20.2–30.2)                       |
| Rank 3                           | <b>Reference to antibiotics, drug-resistant germs</b> | <b>10.6%<br/>(8.1–13.8)</b> | Side-effects, drug allergy                            | 9.2%<br>(5.2–15.8)         | <b>Reference to antibiotics, drug-resistant germs</b><br><b>9.6%<br/>(6.9–13.1)</b> |
| Rank 4                           | Don’t know                                            | 6.3%<br>(4.6–8.7)           | <b>Reference to antibiotics, drug-resistant germs</b> | <b>7.7%<br/>(4.7–12.5)</b> | Don’t know<br>4.0%<br>(2.3–6.8)                                                     |



|        |                            |                   |                                       |                    |                                       |                   |
|--------|----------------------------|-------------------|---------------------------------------|--------------------|---------------------------------------|-------------------|
| Rank 5 | Side-effects, drug allergy | 4.2%<br>(2.6–6.7) | Addicted to / preference for medicine | 7.1%<br>(3.5–13.8) | Sickness is “stubborn” / unresponsive | 2.9%<br>(1.3–6.2) |
|--------|----------------------------|-------------------|---------------------------------------|--------------------|---------------------------------------|-------------------|

Source: Authors' analysis of survey data.

Notes: Ranking percentages only include respondents who indicated that they had heard the respective term “drug resistance” before. Chiang Rai:  $n = 871$ ; Salavan (*due yah*):  $n = 206$ ; Salavan (*lueng yah*):  $n = 470$ . Population-weighted statistics, accounting for complex survey design. Only single response permitted. In Salavan, the common response “*due yah* means *lueng yah*” (24.8% [18.4–32.6]) was recoded to incorporate respondent's definition of *lueng yah*.

Among our 2141 respondents, we captured 608 illness episodes in Chiang Rai and 356 in Salavan.

Table 1 illustrates that healthcare utilisation during these episodes varied slightly across the two field sites. Chiang Rai respondents accessed a narrower spectrum of healthcare providers and were significantly less likely to access public and “other” healthcare providers ( $p < 0.001$  in both cases). Both sites also exhibited a high level of medicine access, with 2.2 and 2.5 medicine use episodes during an illness Chiang Rai and Salavan, respectively ( $p = 0.050$ ). Respondents in Chiang Rai thereby indicated higher use of non-antibiotic medicine (Chiang Rai: 1.6; Salavan: 1.3;  $p = 0.048$ ). In contrast, respondents in Salavan had more episodes of antibiotic use per illness (Chiang Rai: 0.2; Salavan: 0.4;  $p < 0.001$ ), and more usage of medicines that could potentially include antibiotics (Chiang Rai: 0.4; Salavan: 0.9;  $p < 0.001$ ). The pattern of antibiotic access was similar for informal sources, but generally lower in Chiang Rai: confirmed antibiotic use from informal channels represented 1.6% of all medicine use episodes in Chiang Rai and 3.3% in Salavan; and 3.6% in Chiang Rai and 7.9% in Salavan if unconfirmed but potential antibiotic use episodes are included.

Appendix Table A3 compares differences between individuals who accessed antibiotics from public, private, and informal sources. Contrary to intuition, patients receiving antibiotics from informal sources had no less wealth or formal education than users of public healthcare. Indeed, wealthier and more educated individuals in Chiang Rai were significantly associated with receiving antibiotics from informal sources (wealth:  $p = 0.012$ ; education:  $p = 0.032$ ). Similarly, awareness of drug resistance was not significantly lower among patients who received antibiotics from informal sources, while the share of respondents who linked drug resistance to biomedical notions of AMR in Salavan was significantly



1  
2  
3 301 higher among individuals accessing antibiotics through informal channels compared to public channels  
4  
5  
6 302 (13.4% vs. 4.4%,  $p=0.030$ ). Patients who accessed antibiotics through informal channels were  
7  
8 303 nevertheless significantly more inclined towards buying over-the-counter antibiotics than public  
9  
10 304 antibiotic users (Chiang Rai:  $p=0.040$ ; Salavan:  $p<0.001$ ).

11  
12  
13 305 Figure 3 compares antibiotic use episodes from public, private, and informal healthcare providers,  
14  
15 306 depending on the patient's attitude towards buying over-the-counter antibiotics (upper section: Chiang  
16  
17 307 Rai; lower section: Salavan; dark-grey-shaded bars for confirmed antibiotics, light-grey-shaded bars  
18  
19  
20 308 for potential antibiotics). The figure demonstrates that the average number of antibiotic use episodes  
21  
22 309 from informal sources was only marginally different for people with different attitudes (although  
23  
24 310 statistically significant in Chiang Rai at  $p=0.030$  for the subset of confirmed antibiotics). However,  
25  
26  
27 311 antibiotic use episodes from public healthcare providers were disproportionately *higher* among people  
28  
29 312 who reported that they would not buy over-the-counter antibiotics, the difference of which was  
30  
31 313 statistically significant in Salavan ( $p<0.001$ ).<sup>iv</sup>

32  
33  
34 314  
35  
36  
37 315 [Insert Figure 3 about here]

38  
39  
40 316 Figure 3. Antibiotic use episodes across field sites and channels of antibiotics access, by attitude  
41  
42 317 towards buying over-the-counter antibiotics.

43  
44  
45 318 Source: Authors' analysis of survey data.

46 319 Notes: Including antibiotics and unclassified medicines that may be antibiotics. Illness-level data, including only completed illnesses  
47 320 experienced by respondent or a child under their supervision. Chiang Rai:  $n = 608$ ; Salavan:  $n = 356$ . Population-weighted statistics,  
48 321 accounting for complex survey design. Multiple types of healthcare access per individual and illness episode possible. Group comparison  
49 322 using Wilcoxon rank-sum tests. Arrows illustrate differences and do not imply a causal relationship. OTC=over-the-counter.

50  
51  
52  
53  
54  
55  
56  
57  
58  
59  
60

---

<sup>iv</sup> Considering only confirmed antibiotic use episodes, the difference was still statistically significant at  $p=0.030$ .

## Discussion and Conclusion

Our paper aimed at informing the understanding of LMIC contexts and AMR-related general population behaviour through a study of antibiotic-related knowledge, attitudes, and practices in rural Thailand and Lao PDR. We demonstrated that rural populations exhibited:

- mixed but surprisingly high levels of awareness and attitudes corresponding to AMR awareness-raising material, although only a minority of villagers were familiar with technical notions of antibiotics and drug resistance;
- relatively low levels of antibiotic access from informal sources; and
- surprisingly counter-intuitive links between informal antibiotic use, people's socio-economic status, and their attitudes—especially among villagers in Salavan, who had disproportionately high antibiotic use if their attitude showed a disinclination against over-the-counter antibiotics.

Our survey data also revealed profound differences between the two field sites despite their cultural and geographical proximity. For example, villagers referred to antibiotics with wide-ranging and locally specific vernacular expressions (only a minority adopted technical language in either site), and “drug resistance” was typically understood as a general tolerance of the body to medicine but local interpretations ranged from patients refusing medicine to patients being addicted to medicine.

The surveys were implemented after the Monsoon season to reduce accessibility barriers like landslides, floods, and farm work. This temporal focus meant that our survey was not able to capture internal migration or seasonal change affecting the epidemiological environment. The rural survey is also unable to speak for urban health behaviour or behavioural patterns outside rural Thailand and Lao PDR, or for awareness and behaviour among healthcare staff and policy makers (with which awareness-raising activities for the general public may interact). Lastly, our focus on health behaviour and our 60-day recall period could introduce recall and social desirability biases. Most LMIC health behaviour research uses 14-30-day recall periods; longer recall periods can lead to underrepresentation

1  
2  
3 347 of lower educated groups [27]. However, for a survey of behaviour rather than of epidemiological  
4  
5  
6 348 patterns, 14-day recall would have truncated the sample to an impractical size (omitting 540/964  
7  
8 349 [56.0%] of all responses) and neglected that illness episodes often extended beyond a fortnight (as was  
9  
10 350 the case for 91/964 [8.7%] of the recorded illnesses). In response, we conducted regular review  
11  
12 351 sessions with our survey team to identify and alleviate social desirability; we excluded chronic  
13  
14  
15 352 illnesses; and our questionnaire asked our respondents to walk through the sequence of events, which  
16  
17 353 improves recall [28]. While we cannot rule out a residual risk of social desirability and recall bias, it  
18  
19 354 is not clear *a priori* whether and how any remaining bias would affect our comparison of antibiotic  
20  
21  
22 355 uses across different healthcare providers.

23  
24 356 By virtue of being a representative rural survey in northern Thailand and southern Lao PDR, the  
25  
26  
27 357 specific notions and behavioural patterns around antibiotic use are not generalisable beyond the study  
28  
29 358 context, even though similar interpretations of antibiotics as “anti-inflammatory medicine” exist  
30  
31 359 elsewhere (e.g. in China) [29]. However, the findings of our study have a broader relevance insofar as  
32  
33  
34 360 they expose the complexity of local knowledge and its relationship to AMR-related behaviour. On the  
35  
36 361 one hand, our work underlines the challenges facing public awareness campaigns as the current  
37  
38 362 principal strategy to change AMR-related population behaviour. For example, if not mindful of the  
39  
40  
41 363 local context, the slogan of the 2017 World Antibiotic Awareness Week to “use antibiotics wisely to  
42  
43 364 combat rising drug resistance” could plausibly entail *increased* antibiotic use or the use of stronger  
44  
45 365 medicine if people understand drug resistance as stubbornness of patients or as a problem applying to  
46  
47  
48 366 all types of medicines.

49  
50 367 On the other hand, our study also demonstrated that the link between knowledge, attitudes, and  
51  
52  
53 368 antibiotic-related behaviour may be weak in LMIC contexts. This disjunction is not new [5], but the  
54  
55 369 counter-intuitive link between education, antibiotic-related attitudes, and antibiotic use from informal  
56  
57 370 sources suggests that AMR-related information can easily entail unintended consequences—  
58  
59  
60 371 knowledge and awareness empower, but people themselves decide how they will use this new “power”

1  
2  
3 372 in their daily lives [30]. For instance, villagers may not necessarily buy antibiotics from unregulated  
4  
5 373 corner shops because of ignorance, but because they become more assertive about their health.  
6  
7

8 374 Considering potential misunderstandings in AMR communication on the one hand and contextual  
9  
10 375 determinants of behaviour beyond knowledge deficits on the other, we call for an expansion of  
11  
12 13376 behavioural AMR strategies to address structural factors of behavioural change. For example,  
13  
14 15377 vulnerability and adversity may drive people into seemingly irrational antimicrobial use [31]. A sick  
15  
16 17378 labourer or factory worker may take antimicrobials desperately to maintain their job and to sustain  
17  
18 20379 their families, in which case it would be futile trying to convince them that their hardship is secondary  
19  
20 22380 to the global health goal of tackling AMR. Yet, it may be possible to alleviate their pressure to consume  
21  
22 23381 antimicrobials through paid sick leave and unemployment insurance. We propose the exploration of  
23  
24 25382 such “AMR-sensitive interventions” to address upstream drivers of antimicrobial use and to  
25  
26 27383 complement education and awareness campaigns—similar to nutrition-sensitive interventions that  
27  
28 29384 target the determinants of mal- and undernutrition through upstream interventions like social safety  
29  
30 31385 nets (rather than e.g. providing supplements directly to people) [32]. AMR-sensitive interventions  
31  
32 33386 require us to venture out of health policy terrain into broader development policy. There is yet little  
33  
34 35387 evidence whether and how such context-oriented approaches bear fruit. Greater involvement of the  
35  
36 37388 social sciences is necessary to uncover this gap and to find constructive solutions that address the social  
37  
38 39389 factors of which AMR is a symptom.  
39  
40  
41  
42  
43  
44  
45  
46

## 47390 **ACKNOWLEDGEMENTS**

48  
49  
50391 We thank our collaborators Caroline OH Jones, Romyen Kosaikanont, Pollavat Praphattong,  
51  
52392 Pathompong Manohan, Paul N Newton, Sommay Keomany, Penporn Warapikuptanun, Daranee  
53  
54 55393 Intralawan, Patchapoom U-Thong, Patipat Benjaroon, Narinnira Sangkham, Sirirat Chailert, Krittanon  
55  
56 57394 Promsutt, Maipheth Keovilayvanh, and Phaengnitta Phanthasomchit for guidance during the study  
57  
58 59395 design and for field survey implementation assistance. We further thank Ernest R Guevarra and Eric  
59  
60

1

2

3 396 Ohuma for helpful discussions, feedback, and support during the survey design phase; Edward Gibbs,

4

5 397 Lisa White, the Centre for Tropical Medicine and Global Health, the CABDyN Complexity Centre,

6

7 and the Mahidol-Oxford Tropical Medicine Research Unit / Wellcome Trust Strategic Award for

8

9 institutional support; Zoë Doran and the Clinical Trials Support Group at the Mahidol Oxford Tropical

10

11 399 Medicine Research Unit for quality assurance during the protocol development process; Alison

12

13 400 Brindle, Claire-Lise Kessler, and John Bleho for engaging communication work; and Karen Valentine,

14

15 401 Holly Blades, and Kanchana Pongsaswat for indispensable operational and logistical assistance.

16

17

18

19

20

21

22

23

24

25

26

27

28

29

30

31

32

33

34

35

36

37

38

39

40

41

42

43

44

45

46

47

48

49

50

51

52

53

54

55

56

57

58

59

60

## **AUTHOR CONTRIBUTIONS**

MJH conceptualised the study, its design, and its theoretical framing. All authors provided inputs into the study design. MJH, GZ, and NC developed the survey instruments. MJH and NC developed the study protocol and cleaned and coded the data. MJH analysed the data and drafted the manuscript. All authors reviewed and approved the manuscript.

## **COMPETING INTERESTS**

We declare that no conflict of interest – financial or otherwise – exists.

## **DATA SHARING**

The data set will be made publicly available in January 2019 on the UK Data Service and equivalent repositories in Thailand and Lao PDR.

## **ETHICS APPROVAL**

The research was reviewed and approved by the University of Oxford Tropical Research Ethics Committee (Ref. OxTREC 528-17), and it received local ethical approval in Thailand from the Mae Fah Luang University Research Ethics Committee on Human Research (Ref. REH 60099), and in Lao

1  
2  
3 417 PDR from the National Ethics Committee for Health Research (Ref. NEHCR 074). Participation in the  
4  
5  
6 418 and educational activity was voluntary and we obtained informed verbal consent from all participants,  
7  
8 419 which was audio recorded and documented by the survey field investigators with a written record of  
9  
10 420 oral consent for each participant.  
11  
12  
13

## 14 421 **FUNDING SOURCES**

17 422 This project is funded by the Antimicrobial Resistance Cross Council Initiative supported by the seven  
18  
19  
20 423 research councils in partnership with the Department of Health and Department for Environment Food  
21  
22 424 & Rural Affairs (grant ref. ES/P00511X/1, administered by the UK Economic and Social Research  
23  
24 425 Council). YKZ was further supported by internal research placement funding by the MSc International  
25  
26 426 Health and Tropical Medicine (University of Oxford). The funders had no involvement in the design  
27  
28  
29 427 and implementation of the project.  
30  
31  
32

## 33 428 **REFERENCES**

- 34  
35  
36 429 1. FAO, OIE, WHO. Handle antimicrobials with care: Tripartite brochure [infographic]. Geneva:  
37  
38 430 World Health Organization, 2017.  
39  
40  
41 431 2. The Review on Antimicrobial Resistance. Tackling drug-resistant infections globally: final report  
42  
43 432 and recommendations. London: The UK Prime Minister, 2016.  
44  
45 433 3. WHO. Global action plan on antimicrobial resistance. Geneva: World Health Organization, 2015.  
46  
47 434 4. MacDougall C, Polk RE. Antimicrobial stewardship programs in health care systems. *Clinical*  
48  
49  
50 435 *Microbiology Reviews* 2005;**18**(4):638-56 doi: 10.1128/CMR.18.4.638-656.2005.  
51  
52 436 5. Chandler CIR, Hutchinson E, Hutchison C. Addressing antimicrobial resistance through social  
53  
54 437 theory: an anthropologically oriented report. London: London School of Hygiene & Tropical  
55  
56  
57 438 Medicine, 2016.  
58  
59  
60

1  
2  
3  
4  
5  
6  
7  
8  
9  
10  
11  
12  
13  
14  
15  
16  
17  
18  
19  
20  
21  
22  
23  
24  
25  
26  
27  
28  
29  
30  
31  
32  
33  
34  
35  
36  
37  
38  
39  
40  
41  
42  
43  
44  
45  
46  
47  
48  
49  
50  
51  
52  
53  
54  
55  
56  
57  
58  
59  
60

6. Cawley J, Ruhm CJ. The economics of risky health behaviors. In: Pauly MV, Mcguire TG, Barros PP, eds. Handbook of health economics. Amsterdam: Elsevier, 2011:95-199.
7. Sheehy-Skeffington J, Rea J. How poverty affects people's decision-making processes. York: Joseph Rowntree Foundation, 2017.
8. Davis M, Whittaker A, Lindgren M, et al. Understanding media publics and the antimicrobial resistance crisis. *Global Public Health* 2017;**13**(9):1158-68 doi: 10.1080/17441692.2017.1336248.
9. Fynbo L, Jensen CS. Antimicrobial stigmatization: public health concerns about conventional pig farming and pig farmers' experiences with stigmatization. *Social science & medicine* 2018;**201**:1-8 doi: 10.1016/j.socscimed.2018.01.036.
10. Elsevier B.V. Scopus. Secondary Scopus 2018. <http://www.scopus.com/>.
11. Research Councils UK. Gateway to research. Secondary Gateway to research 2018. <http://gtr.rcuk.ac.uk/>.
12. Kinh NV, Wertheim HFL, Thwaites GE, et al. Developing an antimicrobial resistance reference laboratory and surveillance programme in Vietnam. *The Lancet Global Health* 2017;**5**(12):e1186-e87 doi: 10.1016/S2214-109X(17)30370-4.
13. GARDP. Business plan 2017-2023: developing new antibiotic treatments and ensuring sustainable access for all. Geneva: Global Antibiotic Research and Development Partnership, 2017.
14. Paton J, Kresge N. Superbugs win another round as Big Pharma leaves antibiotics. *Secondary Superbugs win another round as Big Pharma leaves antibiotics* 2018. <https://www.bloomberg.com/news/articles/2018-07-13/superbugs-win-another-round-as-big-pharma-leaves-antibiotics>.
15. The Lancet. UK life science research: time to burst the biomedical bubble. *The Lancet* 2018;**392**(10143):187 doi: 10.1016/S0140-6736(18)31609-X.



- 1  
2  
3 463 16. Haenssge MJ, Charoenboon N, Zanella G, et al. Antibiotics and activity spaces: protocol of an  
4  
5  
6 464 exploratory study of behaviour, marginalisation, and knowledge diffusion. *BMJ Global Health*  
7  
8 465 2018;**3**(e000621) doi: 10.1136/bmjgh-2017-000621.  
9
- 10 466 17. Holloway KA, Batmanabane G, Puri M, et al. Antibiotic use in South East Asia and policies to  
11  
12 467 promote appropriate use: reports from country situational analyses. *Bmj* 2017;**358**(Suppl1) doi:  
13  
14 10.1136/bmj.j2291.  
15 468
- 16  
17 469 18. Chereau F, Opatowski L, Tourdjman M, et al. Risk assessment for antibiotic resistance in South  
18  
19 470 East Asia. *Bmj* 2017;**358**(Suppl1) doi: 10.1136/bmj.j3393.  
20
- 21  
22 471 19. Public Health England. UK case of *Neisseria gonorrhoeae* with high-level resistance to  
23  
24 472 azithromycin and resistance to ceftriaxone acquired abroad. Health Protection Report  
25  
26 473 Advanced Access Report 2018;**12**(11).  
27
- 28  
29 474 20. Klein EY, Van Boeckel TP, Martinez EM, et al. Global increase and geographic convergence in  
30  
31 475 antibiotic consumption between 2000 and 2015 [epub ahead of print]. *Proceedings of the*  
32  
33 476 *National Academy of Sciences* 2018 doi: 10.1073/pnas.1717295115.  
34
- 35  
36 477 21. Haenssge MJ. Satellite-aided survey sampling and implementation in low- and middle-income  
37  
38 478 contexts: a low-cost/low-tech alternative. *Emerging Themes in Epidemiology* 2015;**12**(20) doi:  
39  
40 479 10.1186/s12982-015-0041-8.  
41
- 42 480 22. Wikimedia Commons. Locator map of Chiang Rai Province, Thailand, by NordNordWest; a map  
43  
44  
45 481 of Laos with Salavan province highlighted, by Infernoapple. Secondary Locator map of Chiang  
46  
47 482 Rai Province, Thailand, by NordNordWest; a map of Laos with Salavan province highlighted,  
48  
49 483 by Infernoapple 2018. Wikimedia Commons Web pages:  
50  
51 484 [http://en.wikipedia.org/wiki/File:Gansu\\_in\\_China\\_\(%2Ball\\_claims\\_hatched\).svg](http://en.wikipedia.org/wiki/File:Gansu_in_China_(%2Ball_claims_hatched).svg) and  
52  
53  
54 485 [https://commons.wikimedia.org/wiki/File:Rajasthan\\_in\\_India\\_\(claimed\\_and\\_disputed\\_hatched\).svg?uselang=en](https://commons.wikimedia.org/wiki/File:Rajasthan_in_India_(claimed_and_disputed_hatched).svg?uselang=en)  
55  
56 486  
57  
58  
59  
60



1

2

3

4

5

6

7

8

9

10

11

12

13

14

15

16

17

18

19

20

21

22

23

24

25

26

27

28

29

30

31

32

33

34

35

36

37

38

39

40

41

42

43

44

45

46

47

48

49

50

51

52

53

54

55

56

57

58

59

60

23. Willis GB. The practice of cross-cultural cognitive interviewing. *Public Opinion Quarterly* 2015;**79**(S1):359-95 doi: 10.1093/poq/nfu092.
24. Haenssgen MJ, Charoenboon N, Althaus T, et al. The social role of C-reactive protein point-of-care testing to guide antibiotic prescription in Northern Thailand. *Social science & medicine* 2018;**202**:1-12 doi: 10.1016/j.socscimed.2018.02.018.
25. Khine Zaw Y, Charoenboon N, Haenssgen MJ, et al. A comparison of patients' local conceptions of illness and medicines in the context of C-reactive protein biomarker testing in Chiang Rai and Yangon. *American Journal of Tropical Medicine and Hygiene* 2018;**98**(6):1661-760 doi: 10.4269/ajtmh.17-0906.
26. McCullough AR, Parekh S, Rathbone J, et al. A systematic review of the public's knowledge and beliefs about antibiotic resistance. *Journal of Antimicrobial Chemotherapy* 2016;**71**(1):27-33 doi: 10.1093/jac/dkv310.
27. Das J, Hammer J, Sánchez-Paramo C. The impact of recall periods on reported morbidity and health seeking behavior. *Journal of Development Economics* 2012;**98**(1):76-88 doi: <http://dx.doi.org/10.1016/j.jdeveco.2011.07.001>.
28. Fowler FJ. *Improving survey questions: design and evaluation*. Thousand Oaks, CA: Sage, 1995.
29. Yu M, Zhao G, Stålsby Lundborg C, et al. Knowledge, attitudes, and practices of parents in rural China on the use of antibiotics in children: a cross-sectional study. *BMC Infectious Diseases* 2014;**14**(1):112 doi: 10.1186/1471-2334-14-112.
30. Carrion ML. "You need to do your research": vaccines, contestable science, and maternal epistemology. *Public Understanding of Science* 2018;**27**(3):310-24 doi: 10.1177/0963662517728024.
31. Ribera JM, Hausmann-Muela S. The straw that breaks the camel's back: redirecting health-seeking behavior studies on malaria and vulnerability. *Medical Anthropology Quarterly* 2011;**25**(1):103-21 doi: 10.1111/j.1548-1387.2010.01139.x.

- 1  
2  
3 512 32. Ruel MT, Alderman H, The Maternal and Child Nutrition Study Group. Nutrition-sensitive  
4  
5 513 interventions and programmes: How can they help to accelerate progress in improving maternal  
6  
7 and child nutrition? The Lancet 2013;**382**(9891):536-51 doi: 10.1016/S0140-6736(13)60843-  
8 514  
9  
10 515 0.  
11  
12  
13 516  
14  
15  
16 517

For peer review only

1  
2  
3  
4  
5  
6  
7  
8  
9  
10  
11  
12  
13  
14  
15  
16  
17  
18  
19  
20  
21  
22  
23  
24  
25  
26  
27  
28  
29  
30  
31  
32  
33  
34  
35  
36  
37  
38  
39  
40  
41  
42  
43  
44  
45  
46  
47  
48  
49  
50  
51  
52  
53  
54  
55  
56  
57  
58  
59  
60

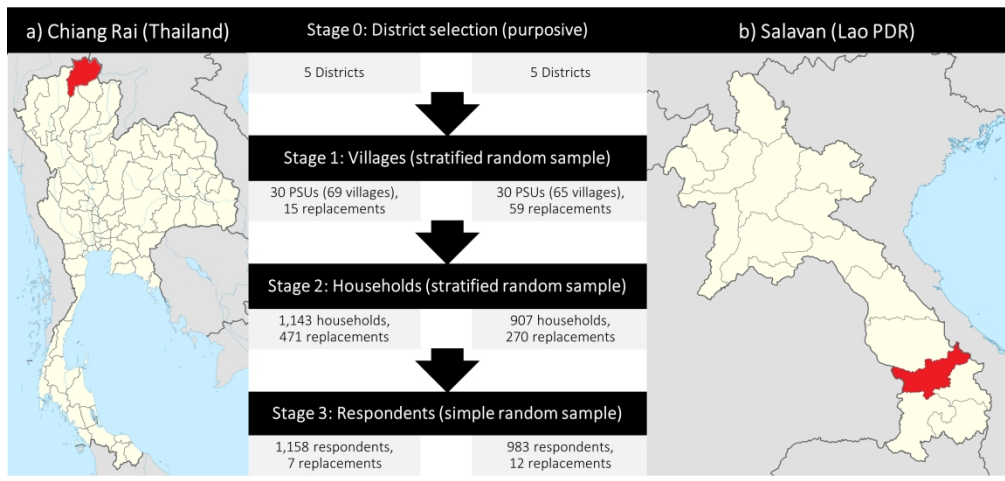

Survey sites and multi-stage sampling process. Source: Authors, adapted from Wikimedia Commons [22].  
 Notes: Unavailable selections at each sampling stage were substituted with a random replacement for the random samples of PSUs and household members, and with the nearest available neighbour for the interval sample of households. One PSU could contain more than one administrative village; if the first-chosen village contained less than 600 houses, then adjacent villages would be included. PSU=Primary Sampling Unit.

257x120mm (300 x 300 DPI)

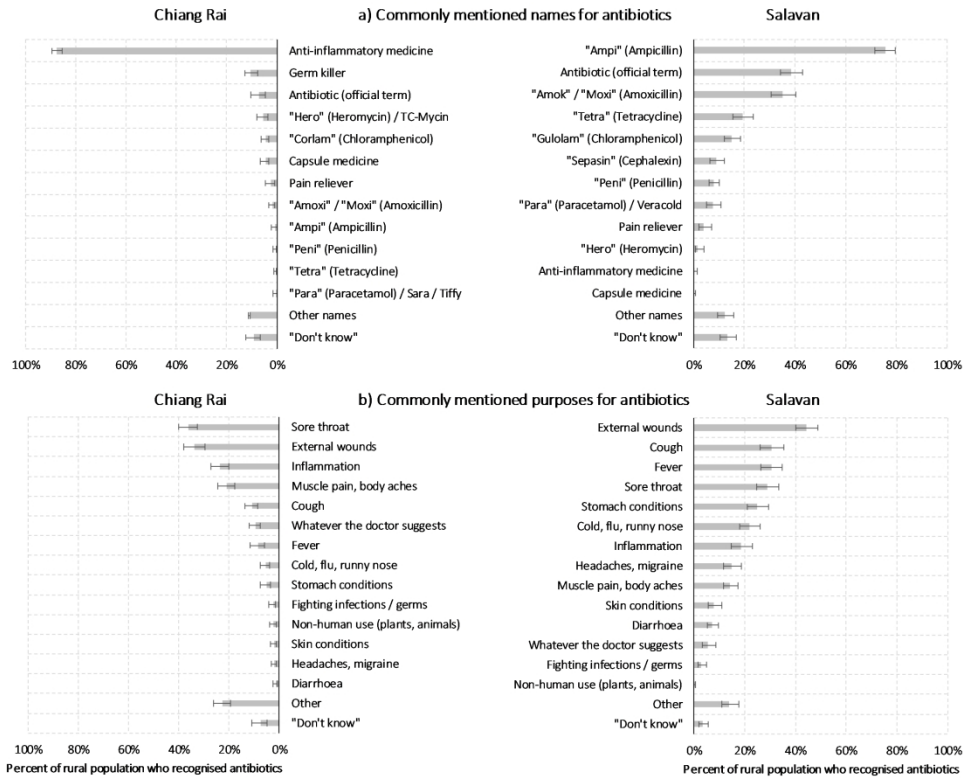

Common names and purposes for antibiotics. Source: Authors' analysis of survey data. Notes: Only including respondents who indicated that they had seen the presented medicine (i.e. common antibiotics) before. Chiang Rai: n = 1076; Salavan: n = 775. Population-weighted statistics, accounting for complex survey design. Multiple response permitted. Error bars indicate 95% confidence interval.

249x193mm (300 x 300 DPI)

1  
2  
3  
4  
5  
6  
7  
8  
9  
10  
11  
12  
13  
14  
15  
16  
17  
18  
19  
20  
21  
22  
23  
24  
25  
26  
27  
28  
29  
30  
31  
32  
33  
34  
35  
36  
37  
38  
39  
40  
41  
42  
43  
44  
45  
46  
47  
48  
49  
50  
51  
52  
53  
54  
55  
56  
57  
58  
59  
60

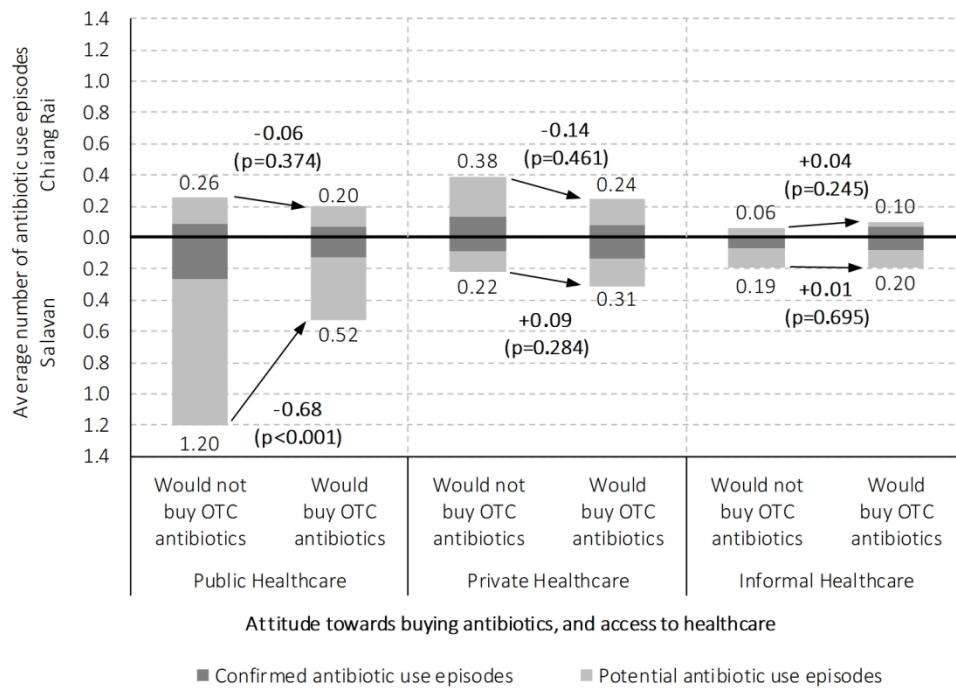

Antibiotic use episodes across field sites and channels of antibiotics access, by attitude towards buying over-the-counter antibiotics. Source: Authors' analysis of survey data. Notes: Including antibiotics and unclassified medicines that may be antibiotics. Illness-level data, including only completed illnesses experienced by respondent or a child under their supervision. Chiang Rai: n = 608; Salavan: n = 356. Population-weighted statistics, accounting for complex survey design. Multiple types of healthcare access per individual and illness episode possible. Group comparison using Wilcoxon rank-sum tests. Arrows illustrate differences and do not imply a causal relationship. OTC=over-the-counter.

139x100mm (300 x 300 DPI)

1 Appendix Figure A1. Trend of AMR-related social sciences and multidisciplinary publications, 1970–  
 2 2017.

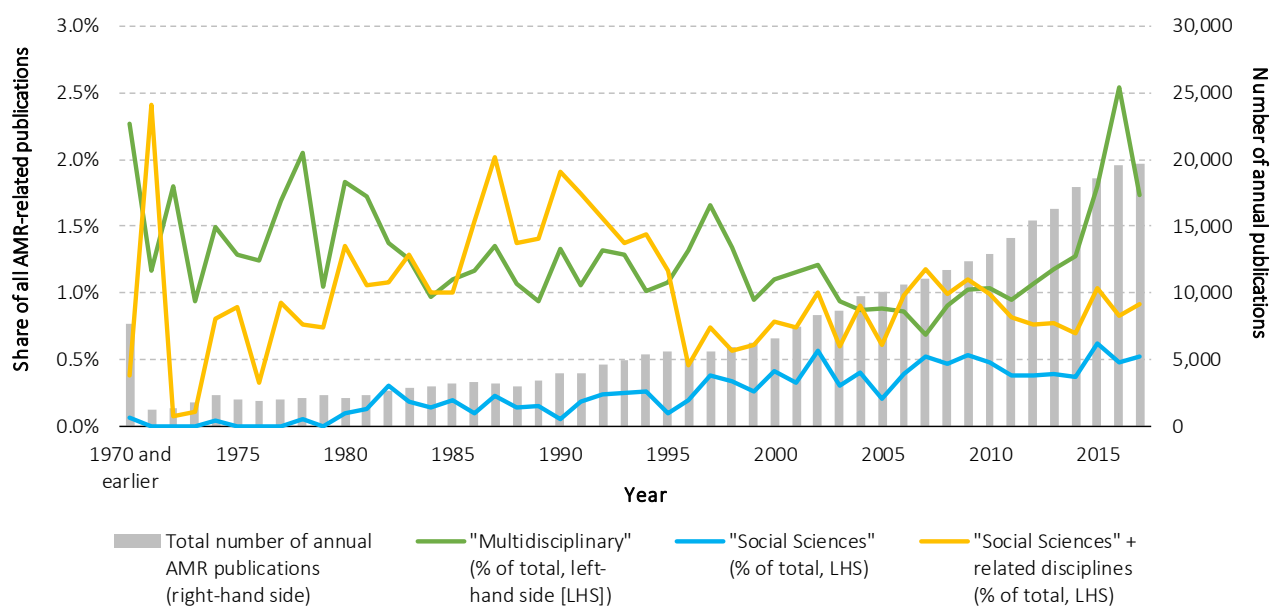

Source: Authors, based on Elsevier B.V. [15].

Notes: Data until 2018, as of 9 October 2018. Disciplines as reported by Scopus database, with “Social Sciences’ + related disciplines” providing upper bound of social science publications including Arts and Humanities;” “Business, Management and Accounting;” “Decision Sciences;” “Economics, Econometrics and Finance;” and “Psychology” alongside “Social Sciences.” Based on search query [TITLE-ABS-KEY (“antibiotic resistance” OR “drug resistance” OR “antimicrobial resistance” OR “AMR”)]. Total number of publications as of 9 October 2018 was 347,511, of which 66.0% arose from “Medicine;” 28.3% from “Biochemistry, Genetics and Molecular Biology;” and 18.2% from “Immunology and Microbiology” (multiple categories per publication possible.) “Social Sciences” average during the period was 0.4% (0.9% for “Social Sciences’ + related disciplines”). LHS=left-hand side.

## 12 Appendix Table A2. Variable descriptions.

|                                  | Variable                                    | Description                                                                                                                                                                                                                                                                                                                                                                                                                                                                                                                                                                     |
|----------------------------------|---------------------------------------------|---------------------------------------------------------------------------------------------------------------------------------------------------------------------------------------------------------------------------------------------------------------------------------------------------------------------------------------------------------------------------------------------------------------------------------------------------------------------------------------------------------------------------------------------------------------------------------|
| Demographic attributes           | Female                                      | Binary variable: Sex of respondent (R); [1] if female.                                                                                                                                                                                                                                                                                                                                                                                                                                                                                                                          |
|                                  | Age                                         | Continuous variable: Age in years.                                                                                                                                                                                                                                                                                                                                                                                                                                                                                                                                              |
|                                  | Education                                   | Continuous variable: Completed years of formal education.                                                                                                                                                                                                                                                                                                                                                                                                                                                                                                                       |
|                                  | Speaking Thai / Lao                         | Binary variable: [1] if R reported ability to communicate in main language (irrespective of reading and writing).                                                                                                                                                                                                                                                                                                                                                                                                                                                               |
|                                  | Wealth index                                | Continuous variable: Average of 17 household assets and amenities on scale from [0] to [1].                                                                                                                                                                                                                                                                                                                                                                                                                                                                                     |
|                                  | Buddhist religion                           | Binary variable: [1] if R belongs to the majority religion (Buddhism in both sites).                                                                                                                                                                                                                                                                                                                                                                                                                                                                                            |
|                                  | Thai/Lao nationality                        | Binary variable: [1] if R has Thai (Chiang Rai) or Lao (Salavan) nationality.                                                                                                                                                                                                                                                                                                                                                                                                                                                                                                   |
|                                  | Majority ethnic group                       | Binary variable: [1] if R belongs to the majority ethnic group Thai (Chiang Rai) or Lao Loum (Salavan).                                                                                                                                                                                                                                                                                                                                                                                                                                                                         |
| Antibiotic knowledge / attitudes | Aware of antibiotics                        | Binary variable: [1] if R recognised images of antibiotic capsules that are common in the field site and, if not, the most common translation of antibiotics as “anti-inflammatory drug” (“ยาแก้อักเสบ” or “yah kae ak seb”) in Thai and “germ resister” (“ยาตัวงัดเชื้อ” or “yah dtan suea”) in Lao. Additional categorical variables (coded ex ante and ex post) recorded the names and purposes that the respondent reported following recognition of the medicine.                                                                                                          |
|                                  | Aware of drug resistance                    | Binary variable: [1] if R recognised the local terms for “drug resistance.” In Thai, “drug resistance” was translated as “ดื้อยา” (“due yah”). Lao has two translations of which “ดื้อยา” (“due yah”) is the formal term and “ລູງຢາ” (“lueng yah”) is a more colloquial but broader expression (both translations were asked separately). Additional categorical variables (coded ex ante and ex post) recorded the interpretations of each term.                                                                                                                               |
|                                  | Would not buy antibiotics over the counter  | Binary variable: [1] if answer to question “Is there any situation for which you would buy this medicine?” corresponded to FAO/OIE/WHO message “When using antibiotics: follow professional advice” (field coded based on survey training manual) [1].                                                                                                                                                                                                                                                                                                                          |
|                                  | Prefers alternatives over antibiotics       | Binary variable: [1] if answer to question “Do you prefer other remedies such as herbs or cough syrup to this medicine for sore throat?” corresponded to FAO/OIE/WHO message “Ensure medicines are only used when necessary” (field coded) [1].                                                                                                                                                                                                                                                                                                                                 |
|                                  | Does not keep antibiotics for future use    | Binary variable: [1] if answer to question “If you were prescribed this medicine by a doctor and did not finish the course, would you keep it for future use?” corresponded to FAO/OIE/WHO message “When using antibiotics: never share medicines or use leftover drugs to treat a different illness” (field coded) [1].                                                                                                                                                                                                                                                        |
|                                  | Knows that antibiotic resistance can spread | Binary variable: [1] if answer to question “Can your ‘due yah’ (drug resistance) spread to other people, for example if you sneeze on them?” corresponded to FAO/OIE/WHO message “antimicrobial resistance can affect us all” (field coded) [1].                                                                                                                                                                                                                                                                                                                                |
|                                  | Answer score                                | Continuous variable: Number of preceding answers ([0] to [4]) corresponding to FAO/OIE/WHO material [1].                                                                                                                                                                                                                                                                                                                                                                                                                                                                        |
| Illness episodes                 | Self-rated severity                         | Ordinal variable: [1] if illness is reported as “mild;” [2] as “moderate;” [3] as “severe.”                                                                                                                                                                                                                                                                                                                                                                                                                                                                                     |
|                                  | Duration of illness episode                 | Continuous variable: Total duration of illness episode in days, calculated as sum of duration of individual steps in episode.                                                                                                                                                                                                                                                                                                                                                                                                                                                   |
| Treatment-seeking behaviour      | Public healthcare provider                  | Binary variable: [1] if R reported accessing health centre or hospital during illness episode.                                                                                                                                                                                                                                                                                                                                                                                                                                                                                  |
|                                  | Private healthcare provider                 | Binary variable: [1] if R reported accessing private clinic, hospital, or pharmacy.                                                                                                                                                                                                                                                                                                                                                                                                                                                                                             |
|                                  | Informal healthcare provider                | Binary variable: [1] if R reported accessing grocery store or traditional healer.                                                                                                                                                                                                                                                                                                                                                                                                                                                                                               |
|                                  | Care from family or self-care               | Binary variable: [1] if R reported self-treatment or care from family member or friend.                                                                                                                                                                                                                                                                                                                                                                                                                                                                                         |
|                                  | Other types of healthcare access            | Binary variable: [1] if R reported accessing other healthcare provider (e.g. village health volunteer).                                                                                                                                                                                                                                                                                                                                                                                                                                                                         |
|                                  | Medicines use episodes                      | Continuous variable: Number of reported medicine use episodes per illness, categorised into types of medicine (coded ex post into non-antibiotic medicine, antibiotics, and potential antibiotics) and sources of access (public, private, informal healthcare provider). Note that the actual amount of medicine used during each “medicine use episode” is likely to vary systematically across formal and informal healthcare providers, with “episodes” from the latter typically containing only a small number of pills and capsules for immediate treatment of symptoms. |

13 Source: Authors.

14 Appendix Table A3. Characteristics of individuals who received antibiotics from public, private, and  
15 informal sources.

|                                                    | Chiang Rai               |                           |                            | p values <sup>c</sup> |                |                | Salavan                  |                           |                            | p values <sup>c</sup> |                |                |
|----------------------------------------------------|--------------------------|---------------------------|----------------------------|-----------------------|----------------|----------------|--------------------------|---------------------------|----------------------------|-----------------------|----------------|----------------|
|                                                    | Public antibiotic access | Private antibiotic access | Informal antibiotic access | Publ. vs. priv.       | Publ. vs. inf. | Priv. vs. inf. | Public antibiotic access | Private antibiotic access | Informal antibiotic access | Publ. vs. priv.       | Publ. vs. inf. | Priv. vs. inf. |
| Number                                             | 93                       | 115                       | 35                         | 200                   | 110            | 132            | 157                      | 38                        | 41                         | 179                   | 178            | 77             |
| <b>Demographics</b>                                |                          |                           |                            |                       |                |                |                          |                           |                            |                       |                |                |
| Female                                             | 53.8%<br>(40.3–66.8)     | 59.6%<br>(46.6–71.4)      | 56.9%<br>(34.2–77.1)       | 0.462                 | 0.738          | 0.832          | 71.5%<br>(63.8–78.2)     | 41.0%<br>(23.5–61.1)      | 71.8%<br>(51.2–86.1)       | 0.003                 | 0.790          | 0.017          |
| Age                                                | 43<br>(13)               | 48<br>(14)                | 40<br>(11)                 | 0.158                 | 0.584          | >0.001         | 35<br>(19)               | 33<br>(12)                | 39<br>(18)                 | 0.674                 | 0.338          | 0.349          |
| Education (years)                                  | 6.2<br>(4.9)             | 5.8<br>(5.2)              | 8.0<br>(3.8)               | 0.766                 | 0.238          | 0.032          | 4.7<br>(6.3)             | 8.1<br>(5.9)              | 5.9<br>(5.5)               | >0.001                | 0.419          | 0.139          |
| Speaking Thai / Lao                                | 92.3%<br>(81.9–96.9)     | 85%<br>(73.7–92)          | 98%<br>(86.1–99.7)         | 0.157                 | 0.227          | 0.036          | 92.7%<br>(89.3–95.1)     | 100.0%<br>(100.0–100.0)   | 100.0%<br>(100.0–100.0)    | 0.007                 | 0.029          | ..             |
| Wealth index                                       | 0.6<br>(0.1)             | 0.7<br>(0.1)              | 0.7<br>(0.1)               | 0.015                 | >0.001         | 0.012          | 0.4<br>(0.2)             | 0.5<br>(0.1)              | 0.5<br>(0.2)               | >0.001                | 0.389          | 0.205          |
| Buddhist religion                                  | 78.5%<br>(64.8–87.8)     | 77.2%<br>(63.9–86.6)      | 89.0%<br>(74.4–95.8)       | 0.871                 | 0.236          | 0.149          | 66.5%<br>(58.3–73.8)     | 78.9%<br>(52.9–92.5)      | 79.2%<br>(58.9–91.0)       | 0.310                 | 0.110          | 0.976          |
| Thai/Lao nationality                               | 97.1%<br>(89.8–99.2)     | 95.9%<br>(88.8–98.5)      | 98%<br>(86.1–99.7)         | 0.710                 | 0.865          | 0.597          | 99%<br>(92.9–99.9)       | 100.0%<br>(100.0–100.0)   | 97.6%<br>(84.0–99.7)       | 0.539                 | 0.418          | >0.001         |
| Majority ethnic group (Thai/Lao Loum)              | 58.8%<br>(45.3–71.1)     | 64.6%<br>(52.3–75.3)      | 81.9%<br>(65.8–91.4)       | 0.439                 | 0.009          | 0.098          | 58.6%<br>(48.9–67.7)     | 69.9%<br>(45.6–86.6)      | 68.2%<br>(44.4–85.2)       | 0.401                 | 0.417          | 0.865          |
| <b>Antibiotic knowledge / attitudes</b>            |                          |                           |                            |                       |                |                |                          |                           |                            |                       |                |                |
| Aware of antibiotics                               | 97.5%<br>(90.4–99.4)     | 95.7%<br>(88.6–98.4)      | 93.3%<br>(64.5–99.1)       | 0.519                 | 0.107          | 0.629          | 88.7%<br>(82.3–92.9)     | 92.7%<br>(72.2–98.4)      | 100.0%<br>(100.0–100.0)    | 0.276                 | 0.022          | 0.142          |
| Aware of drug resistance <sup>a</sup>              | 75.0%<br>(62.5–84.3)     | 76.5%<br>(64.9–85.1)      | 90.2%<br>(76.4–96.4)       | 0.807                 | 0.074          | 0.062          | 66.3%<br>(57.8–73.8)     | 84.7%<br>(61.1–95.1)      | 79.5%<br>(61.3–90.5)       | 0.091                 | 0.141          | 0.676          |
| Links drug resistance to AMR concepts <sup>b</sup> | 1.7%<br>(0.3–9.5)        | 5.4%<br>(2.0–13.6)        | 1.3%<br>(0.2–9.0)          | 0.241                 | 0.916          | 0.027          | 4.4%<br>(2.0–9.3)        | 9.0%<br>(1.9–33.5)        | 13.4%<br>(5.6–28.7)        | 0.349                 | 0.030          | 0.608          |
| Would not buy antibiotics over the counter         | 62.0%<br>(48.2–74.1)     | 62.1%<br>(48.3–74.2)      | 42.0%<br>(22.0–65.0)       | 0.963                 | 0.046          | 0.040          | 44.5%<br>(35.9–53.5)     | 18.3%<br>(9.3–32.7)       | 23.3%<br>(12.3–39.6)       | >0.001                | >0.001         | 0.441          |
| Prefers antibiotics over alternatives              | 62.7%<br>(49.6–74.2)     | 50.2%<br>(36.8–63.6)      | 70.3%<br>(46.2–86.7)       | 0.119                 | 0.286          | 0.078          | 22.8%<br>(16.8–30.2)     | 33.7%<br>(19.5–51.7)      | 29.3%<br>(13.7–52.0)       | 0.117                 | 0.546          | 0.557          |
| Does not keep antibiotics for future use           | 54.3%<br>(41.2–66.8)     | 53.9%<br>(41.7–65.6)      | 38.1%<br>(18.9–62.0)       | 0.972                 | 0.353          | 0.072          | 21.1%<br>(14.2–30.2)     | 14.0%<br>(4.6–35.4)       | 13.9%<br>(5.2–32.1)        | 0.474                 | 0.154          | 0.996          |
| Knows that antibiotic resistance can spread        | 8.1%<br>(3.9–16.2)       | 10.9%<br>(5.7–19.9)       | 6.5%<br>(1.6–23.2)         | 0.478                 | 0.620          | 0.470          | 1.9%<br>(0.5–6.6)        | 1.8%<br>(0.2–12.4)        | 0.0%<br>(0.0–0.0)          | 0.986                 | 0.172          | 0.341          |
| Answer score (0 to 4)                              | 1.9<br>(0.9)             | 1.8<br>(0.9)              | 1.6<br>(0.8)               | 0.589                 | 0.086          | 0.294          | 0.9<br>(1.1)             | 0.7<br>(0.7)              | 0.7<br>(0.6)               | 0.064                 | 0.061          | 0.964          |

16 Source: Authors' analysis of survey data.

17 Notes: Including antibiotics and unconfirmed medicines that may include antibiotics. Illness-level data, including only completed  
18 illnesses experienced by respondent or a child under their supervision. Population-weighted statistics, accounting for complex survey  
19 design. Multiple types of healthcare access per individual and illness episode possible.

20 a. Comparing Thai “due yah” with the combined Lao “due yah” and “lueng yah.”

21 b. Corresponding to interpretation of “drug resistance” as “Reference to antibiotics, drug-resistant germs” in Exhibit 6.

22 c. X2 and Wilcoxon rank-sum tests, omitting simultaneous antibiotic access from more than one type of healthcare provider, which was  
23 the case in 82/958 [8.6%] of all pairwise comparisons of antibiotic access.



|                                                                                                                  |                                                  |                                                    |
|------------------------------------------------------------------------------------------------------------------|--------------------------------------------------|----------------------------------------------------|
| 1. Village Checklist (GPS coordinates of village and facilities) (to be completed by supervisor)                 |                                                  |                                                    |
| What kind of facility would you like to record?                                                                  |                                                  |                                                    |
| A. District Number                                                                                               |                                                  | [code entered automatically]                       |
| B. Village Number                                                                                                |                                                  | [code entered automatically]                       |
| C. Village centre                                                                                                | a) Latitude                                      | [coordinates entered automatically]                |
|                                                                                                                  | b) Longitude                                     | [coordinates entered automatically]                |
| D. Village head's house                                                                                          | a) Latitude                                      | [coordinates entered automatically]                |
|                                                                                                                  | b) Longitude                                     | [coordinates entered automatically]                |
| E. Local shop                                                                                                    | a) Latitude                                      | [coordinates entered automatically]                |
|                                                                                                                  | b) Longitude                                     | [coordinates entered automatically]                |
| F. Market                                                                                                        | a) Latitude                                      | [coordinates entered automatically]                |
|                                                                                                                  | b) Longitude                                     | [coordinates entered automatically]                |
| G. Temple                                                                                                        | a) Latitude                                      | [coordinates entered automatically]                |
|                                                                                                                  | b) Longitude                                     | [coordinates entered automatically]                |
| H. School                                                                                                        | a) Latitude                                      | [coordinates entered automatically]                |
|                                                                                                                  | b) Longitude                                     | [coordinates entered automatically]                |
| I. Bus stop                                                                                                      | a) Latitude                                      | [coordinates entered automatically]                |
|                                                                                                                  | b) Longitude                                     | [coordinates entered automatically]                |
| J. Health facility<br>Specify (public, private,<br>pharmacy, local store,<br>traditional healer, etc.):<br>_____ | a) Latitude                                      | [coordinates entered automatically]                |
|                                                                                                                  | b) Longitude                                     | [coordinates entered automatically]                |
|                                                                                                                  | c) Who is staffing the facility?                 | Total staff: ____<br>Staff at time of visit: _____ |
|                                                                                                                  | d) Does the provider have antibiotics available? | Yes ..... 1<br>No ..... 0                          |

Peer review only

| <b>Interview data [Record observation]</b>                                                                                                                                                                                                                                                                                                                                                                                                                                                                                            |                 |                                                                                                                                                                                                                                                                                                                                                                                                                                                                                    |                   |                                           |      |          |             |     |                                           |  |  |  |  |  |  |  |  |  |  |  |  |  |  |  |
|---------------------------------------------------------------------------------------------------------------------------------------------------------------------------------------------------------------------------------------------------------------------------------------------------------------------------------------------------------------------------------------------------------------------------------------------------------------------------------------------------------------------------------------|-----------------|------------------------------------------------------------------------------------------------------------------------------------------------------------------------------------------------------------------------------------------------------------------------------------------------------------------------------------------------------------------------------------------------------------------------------------------------------------------------------------|-------------------|-------------------------------------------|------|----------|-------------|-----|-------------------------------------------|--|--|--|--|--|--|--|--|--|--|--|--|--|--|--|
| i. District Number                                                                                                                                                                                                                                                                                                                                                                                                                                                                                                                    |                 | [code entered automatically]                                                                                                                                                                                                                                                                                                                                                                                                                                                       |                   |                                           |      |          |             |     |                                           |  |  |  |  |  |  |  |  |  |  |  |  |  |  |  |
| ii. PSU Number                                                                                                                                                                                                                                                                                                                                                                                                                                                                                                                        |                 | [code entered automatically]                                                                                                                                                                                                                                                                                                                                                                                                                                                       |                   |                                           |      |          |             |     |                                           |  |  |  |  |  |  |  |  |  |  |  |  |  |  |  |
| iii. Household number                                                                                                                                                                                                                                                                                                                                                                                                                                                                                                                 |                 | Number: _____                                                                                                                                                                                                                                                                                                                                                                                                                                                                      |                   |                                           |      |          |             |     |                                           |  |  |  |  |  |  |  |  |  |  |  |  |  |  |  |
| iv. Household coordinates                                                                                                                                                                                                                                                                                                                                                                                                                                                                                                             | a) Latitude     | [coordinates entered automatically]                                                                                                                                                                                                                                                                                                                                                                                                                                                |                   |                                           |      |          |             |     |                                           |  |  |  |  |  |  |  |  |  |  |  |  |  |  |  |
|                                                                                                                                                                                                                                                                                                                                                                                                                                                                                                                                       | b) Longitude    | [coordinates entered automatically]                                                                                                                                                                                                                                                                                                                                                                                                                                                |                   |                                           |      |          |             |     |                                           |  |  |  |  |  |  |  |  |  |  |  |  |  |  |  |
| v. What type is this house most similar to?                                                                                                                                                                                                                                                                                                                                                                                                                                                                                           |                 | <div style="display: flex; flex-direction: column; align-items: flex-start;"> <div style="margin-bottom: 10px;">  <p>1...</p> </div> <div style="margin-bottom: 10px;">  <p>2...</p> </div> <div>  <p>3...</p> </div> </div> |                   |                                           |      |          |             |     |                                           |  |  |  |  |  |  |  |  |  |  |  |  |  |  |  |
| vi. Time of visit                                                                                                                                                                                                                                                                                                                                                                                                                                                                                                                     | a) First visit  | [time entered automatically]                                                                                                                                                                                                                                                                                                                                                                                                                                                       |                   |                                           |      |          |             |     |                                           |  |  |  |  |  |  |  |  |  |  |  |  |  |  |  |
|                                                                                                                                                                                                                                                                                                                                                                                                                                                                                                                                       | b) Second visit | [time entered automatically]                                                                                                                                                                                                                                                                                                                                                                                                                                                       |                   |                                           |      |          |             |     |                                           |  |  |  |  |  |  |  |  |  |  |  |  |  |  |  |
| <b>List all persons aged 18+ years in household</b>                                                                                                                                                                                                                                                                                                                                                                                                                                                                                   |                 |                                                                                                                                                                                                                                                                                                                                                                                                                                                                                    |                   |                                           |      |          |             |     |                                           |  |  |  |  |  |  |  |  |  |  |  |  |  |  |  |
| <p>Hello, I'm a researcher working for the Mahidol-Oxford Tropical Medicine Research Unit. We are interested in the lives and health behaviours of villagers across Thailand and Lao PDR. We are selecting participants randomly and would like to choose one or two members of your household. In order to choose and ask them to participate, could you please tell us who lives here? [provide PIS on request]</p> <p><b>[1 respondent per every 5 household members will be selected randomly from this list]</b></p>             |                 |                                                                                                                                                                                                                                                                                                                                                                                                                                                                                    |                   |                                           |      |          |             |     |                                           |  |  |  |  |  |  |  |  |  |  |  |  |  |  |  |
| <table border="1" style="width: 100%; border-collapse: collapse;"> <thead> <tr> <th style="width: 15%;">Name</th> <th style="width: 15%;">Nickname</th> <th style="width: 15%;">Sex (M / F)</th> <th style="width: 15%;">Age</th> <th style="width: 40%;">Available for interview today? (Yes / No)</th> </tr> </thead> <tbody> <tr><td> </td><td> </td><td> </td><td> </td><td> </td></tr> <tr><td> </td><td> </td><td> </td><td> </td><td> </td></tr> <tr><td> </td><td> </td><td> </td><td> </td><td> </td></tr> </tbody> </table> |                 |                                                                                                                                                                                                                                                                                                                                                                                                                                                                                    |                   |                                           | Name | Nickname | Sex (M / F) | Age | Available for interview today? (Yes / No) |  |  |  |  |  |  |  |  |  |  |  |  |  |  |  |
| Name                                                                                                                                                                                                                                                                                                                                                                                                                                                                                                                                  | Nickname        | Sex (M / F)                                                                                                                                                                                                                                                                                                                                                                                                                                                                        | Age               | Available for interview today? (Yes / No) |      |          |             |     |                                           |  |  |  |  |  |  |  |  |  |  |  |  |  |  |  |
|                                                                                                                                                                                                                                                                                                                                                                                                                                                                                                                                       |                 |                                                                                                                                                                                                                                                                                                                                                                                                                                                                                    |                   |                                           |      |          |             |     |                                           |  |  |  |  |  |  |  |  |  |  |  |  |  |  |  |
|                                                                                                                                                                                                                                                                                                                                                                                                                                                                                                                                       |                 |                                                                                                                                                                                                                                                                                                                                                                                                                                                                                    |                   |                                           |      |          |             |     |                                           |  |  |  |  |  |  |  |  |  |  |  |  |  |  |  |
|                                                                                                                                                                                                                                                                                                                                                                                                                                                                                                                                       |                 |                                                                                                                                                                                                                                                                                                                                                                                                                                                                                    |                   |                                           |      |          |             |     |                                           |  |  |  |  |  |  |  |  |  |  |  |  |  |  |  |
| <b>Statement of consent (Respondent will receive participant information sheet and verbal consent will be taken)</b>                                                                                                                                                                                                                                                                                                                                                                                                                  |                 |                                                                                                                                                                                                                                                                                                                                                                                                                                                                                    |                   |                                           |      |          |             |     |                                           |  |  |  |  |  |  |  |  |  |  |  |  |  |  |  |
| Thank you for participating. You will receive a small token of gratitude for your participation at the end of the interview.                                                                                                                                                                                                                                                                                                                                                                                                          |                 |                                                                                                                                                                                                                                                                                                                                                                                                                                                                                    |                   |                                           |      |          |             |     |                                           |  |  |  |  |  |  |  |  |  |  |  |  |  |  |  |
| vii. Date of interview                                                                                                                                                                                                                                                                                                                                                                                                                                                                                                                |                 | [date entered automatically]                                                                                                                                                                                                                                                                                                                                                                                                                                                       |                   |                                           |      |          |             |     |                                           |  |  |  |  |  |  |  |  |  |  |  |  |  |  |  |
| viii. Time of interview begin                                                                                                                                                                                                                                                                                                                                                                                                                                                                                                         |                 | [time entered automatically]                                                                                                                                                                                                                                                                                                                                                                                                                                                       |                   |                                           |      |          |             |     |                                           |  |  |  |  |  |  |  |  |  |  |  |  |  |  |  |
| ix. Respondent name                                                                                                                                                                                                                                                                                                                                                                                                                                                                                                                   |                 | Respondent name: _____                                                                                                                                                                                                                                                                                                                                                                                                                                                             |                   |                                           |      |          |             |     |                                           |  |  |  |  |  |  |  |  |  |  |  |  |  |  |  |
| x. Interviewer code                                                                                                                                                                                                                                                                                                                                                                                                                                                                                                                   |                 | [code entered automatically]                                                                                                                                                                                                                                                                                                                                                                                                                                                       |                   |                                           |      |          |             |     |                                           |  |  |  |  |  |  |  |  |  |  |  |  |  |  |  |
| <b>Part I: Personal and Household Characteristics</b>                                                                                                                                                                                                                                                                                                                                                                                                                                                                                 |                 |                                                                                                                                                                                                                                                                                                                                                                                                                                                                                    |                   |                                           |      |          |             |     |                                           |  |  |  |  |  |  |  |  |  |  |  |  |  |  |  |
| Let us begin with a few questions about yourself and your household.                                                                                                                                                                                                                                                                                                                                                                                                                                                                  |                 |                                                                                                                                                                                                                                                                                                                                                                                                                                                                                    |                   |                                           |      |          |             |     |                                           |  |  |  |  |  |  |  |  |  |  |  |  |  |  |  |
| 1. [record as observed] Sex                                                                                                                                                                                                                                                                                                                                                                                                                                                                                                           |                 | Female..... 1<br>Male ..... 0                                                                                                                                                                                                                                                                                                                                                                                                                                                      |                   |                                           |      |          |             |     |                                           |  |  |  |  |  |  |  |  |  |  |  |  |  |  |  |
| 2. How old are you? [in years] [If respondent cannot give exact age, ask for approximate age and code in range: 18-24, 25-34, 35-44, 45-59, 60 and older]                                                                                                                                                                                                                                                                                                                                                                             |                 | Age in years: _____                                                                                                                                                                                                                                                                                                                                                                                                                                                                |                   |                                           |      |          |             |     |                                           |  |  |  |  |  |  |  |  |  |  |  |  |  |  |  |
| 3. Please indicate what kind of work you do. If you have more than one occupation at one time or throughout the year, please begin with the one in which you spend the most time and name up to three. If you do not have an occupation, please also mention whether you are still a student, retired, or unemployed.                                                                                                                                                                                                                 |                 | a) Main occupation                                                                                                                                                                                                                                                                                                                                                                                                                                                                 | Occupation: _____ |                                           |      |          |             |     |                                           |  |  |  |  |  |  |  |  |  |  |  |  |  |  |  |
|                                                                                                                                                                                                                                                                                                                                                                                                                                                                                                                                       |                 | b) Side occupation                                                                                                                                                                                                                                                                                                                                                                                                                                                                 | Occupation: _____ |                                           |      |          |             |     |                                           |  |  |  |  |  |  |  |  |  |  |  |  |  |  |  |
|                                                                                                                                                                                                                                                                                                                                                                                                                                                                                                                                       |                 | c) Side occupation                                                                                                                                                                                                                                                                                                                                                                                                                                                                 | Occupation: _____ |                                           |      |          |             |     |                                           |  |  |  |  |  |  |  |  |  |  |  |  |  |  |  |
| 4. What is your mother tongue?                                                                                                                                                                                                                                                                                                                                                                                                                                                                                                        |                 | Mother tongue: _____                                                                                                                                                                                                                                                                                                                                                                                                                                                               |                   |                                           |      |          |             |     |                                           |  |  |  |  |  |  |  |  |  |  |  |  |  |  |  |
| 5. [In Thailand:] Can you speak Thai? [In Laos:] Can you speak Lao?                                                                                                                                                                                                                                                                                                                                                                                                                                                                   |                 | Yes ..... 1<br>No ..... 0                                                                                                                                                                                                                                                                                                                                                                                                                                                          |                   |                                           |      |          |             |     |                                           |  |  |  |  |  |  |  |  |  |  |  |  |  |  |  |
| 6. What is the highest grade of schooling that you completed?<br>[excluding informal education and pre-school education such as nursery and kindergarten, but including grade school, high school, vocational training, tertiary education, etc.]                                                                                                                                                                                                                                                                                     |                 |                                                                                                                                                                                                                                                                                                                                                                                                                                                                                    |                   | Highest grade: ____                       |      |          |             |     |                                           |  |  |  |  |  |  |  |  |  |  |  |  |  |  |  |
| 7. Are you the head of your household?                                                                                                                                                                                                                                                                                                                                                                                                                                                                                                |                 |                                                                                                                                                                                                                                                                                                                                                                                                                                                                                    |                   | Yes ..... 1<br>No ..... 0                 |      |          |             |     |                                           |  |  |  |  |  |  |  |  |  |  |  |  |  |  |  |
| 7.1. [if no] What is the name of your household head?                                                                                                                                                                                                                                                                                                                                                                                                                                                                                 |                 |                                                                                                                                                                                                                                                                                                                                                                                                                                                                                    |                   | Name: _____                               |      |          |             |     |                                           |  |  |  |  |  |  |  |  |  |  |  |  |  |  |  |

|    |                                                                                                                                          |                                                                                                                        |                                                                                       |
|----|------------------------------------------------------------------------------------------------------------------------------------------|------------------------------------------------------------------------------------------------------------------------|---------------------------------------------------------------------------------------|
| 1  | 8. What is your current marital status?                                                                                                  | Never married.....                                                                                                     | 1                                                                                     |
| 2  |                                                                                                                                          | Currently married .....                                                                                                | 2                                                                                     |
| 3  |                                                                                                                                          | Cohabiting.....                                                                                                        | 3                                                                                     |
| 4  |                                                                                                                                          | Separated / divorced.....                                                                                              | 4                                                                                     |
| 5  |                                                                                                                                          | Widowed.....                                                                                                           | 5                                                                                     |
| 6  | 9. Are there any close family members of yours [children, spouse, siblings, parents] who live elsewhere? [select "no" if not applicable] | 9.1. Do your parents live outside of this village? [ <b>do not count parents-in-law</b> ]                              | At least 1 person outside village .... 1<br>All inside village / not applicable.... 0 |
| 7  |                                                                                                                                          | 9.2. Does your spouse live outside of this village?                                                                    | At least 1 person outside village .... 1<br>All inside village / not applicable.... 0 |
| 8  |                                                                                                                                          | 9.3. Do you have siblings who live outside of this village? [ <b>do not count brothers-in-law and sisters-in-law</b> ] | At least 1 person outside village .... 1<br>All inside village / not applicable.... 0 |
| 9  |                                                                                                                                          | 9.4. Do you have children who live outside of this village?                                                            | At least 1 person outside village .... 1<br>All inside village / not applicable.... 0 |
| 10 | <b>Part II: Social Networks [for network census villages only]</b>                                                                       |                                                                                                                        |                                                                                       |
| 11 | I will now ask you some questions about your interactions with other people within and outside of your village.                          |                                                                                                                        |                                                                                       |
| 12 | 10. [Round I of network survey only] Where do you spend most of your time interacting with other people from your village?               | a) Field: ____                                                                                                         |                                                                                       |
| 13 |                                                                                                                                          | b) Temple: ____                                                                                                        |                                                                                       |
| 14 |                                                                                                                                          | c) Local store: ____                                                                                                   |                                                                                       |
| 15 |                                                                                                                                          | d) Market: ____                                                                                                        |                                                                                       |
| 16 |                                                                                                                                          | e) Children's schools: ____                                                                                            |                                                                                       |
| 17 |                                                                                                                                          | f) Home: ____                                                                                                          |                                                                                       |
| 18 |                                                                                                                                          | g) Workplace: ____                                                                                                     |                                                                                       |
| 19 |                                                                                                                                          | h) Village event/s: ____                                                                                               |                                                                                       |
| 20 |                                                                                                                                          | i) Other site: ____                                                                                                    |                                                                                       |
| 21 |                                                                                                                                          |                                                                                                                        |                                                                                       |
| 22 |                                                                                                                                          |                                                                                                                        |                                                                                       |
| 23 |                                                                                                                                          |                                                                                                                        |                                                                                       |
| 24 |                                                                                                                                          |                                                                                                                        |                                                                                       |
| 25 |                                                                                                                                          |                                                                                                                        |                                                                                       |
| 26 |                                                                                                                                          |                                                                                                                        |                                                                                       |
| 27 |                                                                                                                                          |                                                                                                                        |                                                                                       |
| 28 |                                                                                                                                          |                                                                                                                        |                                                                                       |
| 29 |                                                                                                                                          |                                                                                                                        |                                                                                       |
| 30 |                                                                                                                                          |                                                                                                                        |                                                                                       |
| 31 |                                                                                                                                          |                                                                                                                        |                                                                                       |
| 32 |                                                                                                                                          |                                                                                                                        |                                                                                       |
| 33 |                                                                                                                                          |                                                                                                                        |                                                                                       |
| 34 |                                                                                                                                          |                                                                                                                        |                                                                                       |
| 35 |                                                                                                                                          |                                                                                                                        |                                                                                       |
| 36 |                                                                                                                                          |                                                                                                                        |                                                                                       |
| 37 |                                                                                                                                          |                                                                                                                        |                                                                                       |
| 38 |                                                                                                                                          |                                                                                                                        |                                                                                       |
| 39 |                                                                                                                                          |                                                                                                                        |                                                                                       |
| 40 |                                                                                                                                          |                                                                                                                        |                                                                                       |
| 41 |                                                                                                                                          |                                                                                                                        |                                                                                       |
| 42 |                                                                                                                                          |                                                                                                                        |                                                                                       |
| 43 |                                                                                                                                          |                                                                                                                        |                                                                                       |
| 44 |                                                                                                                                          |                                                                                                                        |                                                                                       |
| 45 |                                                                                                                                          |                                                                                                                        |                                                                                       |
| 46 |                                                                                                                                          |                                                                                                                        |                                                                                       |
| 47 |                                                                                                                                          |                                                                                                                        |                                                                                       |
| 48 |                                                                                                                                          |                                                                                                                        |                                                                                       |
| 49 |                                                                                                                                          |                                                                                                                        |                                                                                       |
| 50 |                                                                                                                                          |                                                                                                                        |                                                                                       |
| 51 |                                                                                                                                          |                                                                                                                        |                                                                                       |
| 52 |                                                                                                                                          |                                                                                                                        |                                                                                       |
| 53 |                                                                                                                                          |                                                                                                                        |                                                                                       |
| 54 |                                                                                                                                          |                                                                                                                        |                                                                                       |
| 55 |                                                                                                                                          |                                                                                                                        |                                                                                       |
| 56 |                                                                                                                                          |                                                                                                                        |                                                                                       |
| 57 |                                                                                                                                          |                                                                                                                        |                                                                                       |
| 58 |                                                                                                                                          |                                                                                                                        |                                                                                       |
| 59 |                                                                                                                                          |                                                                                                                        |                                                                                       |
| 60 |                                                                                                                                          |                                                                                                                        |                                                                                       |

OxTREC reference: 528-17

| 11. [Round I of network survey only] Outside your household, with whom do you interact on a regular basis? (May be anyone from both inside and outside of the village, and through any platform which might not require a face-to-face interaction) |                                        |                                                                                                                                                                                                             |                                    |                                                                    |                                                           |                                                                                                                                                                   |                                                                                        |                                                           |                                       |
|-----------------------------------------------------------------------------------------------------------------------------------------------------------------------------------------------------------------------------------------------------|----------------------------------------|-------------------------------------------------------------------------------------------------------------------------------------------------------------------------------------------------------------|------------------------------------|--------------------------------------------------------------------|-----------------------------------------------------------|-------------------------------------------------------------------------------------------------------------------------------------------------------------------|----------------------------------------------------------------------------------------|-----------------------------------------------------------|---------------------------------------|
|                                                                                                                                                                                                                                                     | a) What is the nickname of the person? | b) How is this person related to you?<br>[give examples if respondent is unsure about answer categories]                                                                                                    | c) What is the sex of this person? | d) Where does this person live?                                    | e) What is the name of the household head of this person? | f) How often do you interact with this person?                                                                                                                    | g) How do you interact with this person?<br>[Mark all that apply]                      | h) Do your conversations relate to health and well-being? |                                       |
| 11.1.<br>Contact 1                                                                                                                                                                                                                                  | Nickname _____<br>Name _____           | Spouse..... 1<br>Parent..... 2<br>Child ..... 3<br>Sibling..... 4<br>Other relative ..... 5<br>Neighbour ..... 6<br>Friend (if not neighbour)..... 7<br>Other villager ..... 8<br>Other (specify) _ ..... 9 | Female...1<br>Male .....0          | In village ..... 1<br>(specify: _____)<br><br>Outside village .. 2 | Name of household head<br>_____                           | Daily or more often .....4<br>Weekly or few times/week .....3<br>Monthly or few times/month ...2<br>Yearly or few times/year .....1<br>Less often or never .....0 | Face-to-face... 1<br>Voice call..... 2<br>Messenger ..... 3<br>Other (specify) _____ 4 | Yes ..... 1<br>No ..... 0                                 |                                       |
| 11.2.<br>Contact n                                                                                                                                                                                                                                  | Nickname<br>Name                       | 1 2 3 4 5 6 7 8 9                                                                                                                                                                                           | 1 0                                | 1 2                                                                | Name                                                      | 0 1 2 3 4                                                                                                                                                         | 1 2 3 4                                                                                | 1 0                                                       |                                       |
| 11a. [Round II of network survey only] When we last visited you, you told us that you interact regularly with [names]. Has anything changed since last time?                                                                                        |                                        |                                                                                                                                                                                                             |                                    | Yes .....1<br>No .....0                                            |                                                           |                                                                                                                                                                   |                                                                                        |                                                           | → [update social network question 11] |
| 11i. [Round I of network survey only] Is there anybody in your household with whom you talk about health and well-being? [Mark all that apply]                                                                                                      |                                        |                                                                                                                                                                                                             |                                    | [mark all names from household roster that apply]                  |                                                           |                                                                                                                                                                   |                                                                                        |                                                           |                                       |

|                                                                                                                                                                                                                                                                                                                                                                              |                                                                                                                                                                                                              |                                    |
|------------------------------------------------------------------------------------------------------------------------------------------------------------------------------------------------------------------------------------------------------------------------------------------------------------------------------------------------------------------------------|--------------------------------------------------------------------------------------------------------------------------------------------------------------------------------------------------------------|------------------------------------|
| [For network survey village respondents in Round 2]                                                                                                                                                                                                                                                                                                                          |                                                                                                                                                                                                              |                                    |
| 12. An education activity has recently taken place in your village.                                                                                                                                                                                                                                                                                                          |                                                                                                                                                                                                              |                                    |
| 12.1. Did you participate in any of the activities?                                                                                                                                                                                                                                                                                                                          | Yes .....                                                                                                                                                                                                    | 1                                  |
|                                                                                                                                                                                                                                                                                                                                                                              | Yes, but not throughout.....                                                                                                                                                                                 | 2                                  |
|                                                                                                                                                                                                                                                                                                                                                                              | No .....                                                                                                                                                                                                     | 3                                  |
|                                                                                                                                                                                                                                                                                                                                                                              | Don't know / prefer not to say .....                                                                                                                                                                         | 4                                  |
| 12.2. Did you talk with anybody about the activity in your village?<br>["Talking" can involve any conversation including asking for information, informing about the educational activity, or discussing it (regardless of actual attendance)]                                                                                                                               | a) Nickname 1: _____ b) Full name 1: _____ c) Relationship 1: 1 2 3 4 5 6 7<br>a) Nickname n: _____ b) Full name n: _____ c) Relationship n: 1 2 3 4 5 6 7<br>[Relationship codes]<br>Household member ..... | 1                                  |
|                                                                                                                                                                                                                                                                                                                                                                              | Family member outside HH.....                                                                                                                                                                                | 2                                  |
|                                                                                                                                                                                                                                                                                                                                                                              | Other relative .....                                                                                                                                                                                         | 3                                  |
|                                                                                                                                                                                                                                                                                                                                                                              | Neighbour.....                                                                                                                                                                                               | 4                                  |
|                                                                                                                                                                                                                                                                                                                                                                              | Friend other than neighbour.....                                                                                                                                                                             | 5                                  |
|                                                                                                                                                                                                                                                                                                                                                                              | Other villager.....                                                                                                                                                                                          | 6                                  |
|                                                                                                                                                                                                                                                                                                                                                                              | Other (specify) _ .....                                                                                                                                                                                      | 7                                  |
| [If respondent indicates conversation in Q 12.2]                                                                                                                                                                                                                                                                                                                             | Going to doctor when sick .....                                                                                                                                                                              | 1                                  |
| 12.3. What subjects did you talk about in respect to the activity?<br>[mark all that apply]                                                                                                                                                                                                                                                                                  | Anti-inflammatories/antibiotics .....                                                                                                                                                                        | 2                                  |
|                                                                                                                                                                                                                                                                                                                                                                              | Germs.....                                                                                                                                                                                                   | 3                                  |
|                                                                                                                                                                                                                                                                                                                                                                              | Using medicines correctly.....                                                                                                                                                                               | 4                                  |
|                                                                                                                                                                                                                                                                                                                                                                              | Activity in general.....                                                                                                                                                                                     | 5                                  |
|                                                                                                                                                                                                                                                                                                                                                                              | Games/awards.....                                                                                                                                                                                            | 6                                  |
|                                                                                                                                                                                                                                                                                                                                                                              | Song/Story/Play .....                                                                                                                                                                                        | 7                                  |
|                                                                                                                                                                                                                                                                                                                                                                              | Money/compensation.....                                                                                                                                                                                      | 8                                  |
|                                                                                                                                                                                                                                                                                                                                                                              | Other (specify) _____.....                                                                                                                                                                                   | 9                                  |
| <b>Part III: Healthcare Seeking</b> Thank you for this. Now we come to a part where I will ask you some questions about health and health providers around here.                                                                                                                                                                                                             |                                                                                                                                                                                                              |                                    |
| 13. I would now like to ask you about the sources of health advice and medicine or other treatment that are available to you. Please think about all the places where you can go to get advice, treatment, or drugs if you (or your children) are sick.<br><br>Do you consider the following providers when you (or your children) feel unwell?<br><br>[Mark all that apply] | 13.1. Drug dispensary, other local store selling medicine                                                                                                                                                    | Consultation .....                 |
|                                                                                                                                                                                                                                                                                                                                                                              |                                                                                                                                                                                                              | Medical advice.....                |
|                                                                                                                                                                                                                                                                                                                                                                              |                                                                                                                                                                                                              | Access to medicine.....            |
|                                                                                                                                                                                                                                                                                                                                                                              |                                                                                                                                                                                                              | Other reason(s) .....              |
|                                                                                                                                                                                                                                                                                                                                                                              |                                                                                                                                                                                                              | Don't consider this provider ..... |
|                                                                                                                                                                                                                                                                                                                                                                              |                                                                                                                                                                                                              | Don't know such a provider .....   |
|                                                                                                                                                                                                                                                                                                                                                                              | 13.2. Traditional healer                                                                                                                                                                                     | Consultation .....                 |
|                                                                                                                                                                                                                                                                                                                                                                              |                                                                                                                                                                                                              | Medical advice.....                |
|                                                                                                                                                                                                                                                                                                                                                                              |                                                                                                                                                                                                              | Access to medicine.....            |
|                                                                                                                                                                                                                                                                                                                                                                              |                                                                                                                                                                                                              | Other reason(s) .....              |
|                                                                                                                                                                                                                                                                                                                                                                              |                                                                                                                                                                                                              | Don't consider this provider ..... |
|                                                                                                                                                                                                                                                                                                                                                                              |                                                                                                                                                                                                              | Don't know such a provider .....   |
|                                                                                                                                                                                                                                                                                                                                                                              | 13.3. Pharmacist                                                                                                                                                                                             | Consultation .....                 |
|                                                                                                                                                                                                                                                                                                                                                                              |                                                                                                                                                                                                              | Medical advice.....                |
|                                                                                                                                                                                                                                                                                                                                                                              | Access to medicine.....                                                                                                                                                                                      |                                    |
|                                                                                                                                                                                                                                                                                                                                                                              | Other reason(s) .....                                                                                                                                                                                        |                                    |
|                                                                                                                                                                                                                                                                                                                                                                              | Don't consider this provider .....                                                                                                                                                                           |                                    |
|                                                                                                                                                                                                                                                                                                                                                                              | Don't know such a provider .....                                                                                                                                                                             |                                    |
| 13.4. Private clinic                                                                                                                                                                                                                                                                                                                                                         | Consultation .....                                                                                                                                                                                           |                                    |
|                                                                                                                                                                                                                                                                                                                                                                              | Medical advice.....                                                                                                                                                                                          |                                    |
|                                                                                                                                                                                                                                                                                                                                                                              | Access to medicine.....                                                                                                                                                                                      |                                    |
|                                                                                                                                                                                                                                                                                                                                                                              | Other reason(s) .....                                                                                                                                                                                        |                                    |
|                                                                                                                                                                                                                                                                                                                                                                              | Don't consider this provider .....                                                                                                                                                                           |                                    |
|                                                                                                                                                                                                                                                                                                                                                                              | Don't know such a provider .....                                                                                                                                                                             |                                    |
| 13.5. Private hospital                                                                                                                                                                                                                                                                                                                                                       | Consultation .....                                                                                                                                                                                           |                                    |
|                                                                                                                                                                                                                                                                                                                                                                              | Medical advice.....                                                                                                                                                                                          |                                    |
|                                                                                                                                                                                                                                                                                                                                                                              | Access to medicine.....                                                                                                                                                                                      |                                    |
|                                                                                                                                                                                                                                                                                                                                                                              | Other reason(s) .....                                                                                                                                                                                        |                                    |
|                                                                                                                                                                                                                                                                                                                                                                              | Don't consider this provider .....                                                                                                                                                                           |                                    |
|                                                                                                                                                                                                                                                                                                                                                                              | Don't know such a provider .....                                                                                                                                                                             |                                    |
| 13.6. Health volunteer                                                                                                                                                                                                                                                                                                                                                       | Consultation .....                                                                                                                                                                                           |                                    |
|                                                                                                                                                                                                                                                                                                                                                                              | Medical advice.....                                                                                                                                                                                          |                                    |
|                                                                                                                                                                                                                                                                                                                                                                              | Access to medicine.....                                                                                                                                                                                      |                                    |
|                                                                                                                                                                                                                                                                                                                                                                              | Other reason(s) .....                                                                                                                                                                                        |                                    |
|                                                                                                                                                                                                                                                                                                                                                                              | Don't consider this provider .....                                                                                                                                                                           |                                    |
|                                                                                                                                                                                                                                                                                                                                                                              | Don't know such a provider .....                                                                                                                                                                             |                                    |
| 13.7. Public primary care unit                                                                                                                                                                                                                                                                                                                                               | Consultation .....                                                                                                                                                                                           |                                    |
|                                                                                                                                                                                                                                                                                                                                                                              | Medical advice.....                                                                                                                                                                                          |                                    |
|                                                                                                                                                                                                                                                                                                                                                                              | Access to medicine.....                                                                                                                                                                                      |                                    |
|                                                                                                                                                                                                                                                                                                                                                                              | Other reason(s) .....                                                                                                                                                                                        |                                    |
|                                                                                                                                                                                                                                                                                                                                                                              | Don't consider this provider .....                                                                                                                                                                           |                                    |
|                                                                                                                                                                                                                                                                                                                                                                              | Don't know such a provider .....                                                                                                                                                                             |                                    |

|  |                                                             |                                                                                                                                                                                       |
|--|-------------------------------------------------------------|---------------------------------------------------------------------------------------------------------------------------------------------------------------------------------------|
|  | <b>13.8.</b> Public hospital                                | Consultation ..... 1<br>Medical advice..... 2<br>Access to medicine..... 3<br>Other reason(s) ..... 4<br>Don't consider this provider ..... 98<br>Don't know such a provider ..... 99 |
|  | <b>13.9.</b> Other providers or Internet? Specify:<br>_____ | Consultation ..... 1<br>Medical advice..... 2<br>Access to medicine..... 3<br>Other reason(s) ..... 4<br>Don't consider this provider ..... 98<br>Don't know such a provider ..... 99 |

1  
2  
3  
4  
5  
6  
7  
8  
9  
10  
11  
12  
13  
14  
15  
16  
17  
18  
19  
20  
21  
22  
23  
24  
25  
26  
27  
28  
29  
30  
31  
32  
33  
34  
35  
36  
37  
38  
39  
40  
41  
42  
43  
44  
45  
46  
47  
48  
49  
50  
51  
52  
53  
54  
55  
56  
57  
58  
59  
60

For peer review only

| 14. Now if you think again, is there anyone else with whom you talk about health? |                                        |                                         |                                                                                                                                                                                                              |                                    |                                                                    |                                                           |                                                                                                                                                                   |                                                                                           |
|-----------------------------------------------------------------------------------|----------------------------------------|-----------------------------------------|--------------------------------------------------------------------------------------------------------------------------------------------------------------------------------------------------------------|------------------------------------|--------------------------------------------------------------------|-----------------------------------------------------------|-------------------------------------------------------------------------------------------------------------------------------------------------------------------|-------------------------------------------------------------------------------------------|
|                                                                                   | a) What is the nickname of the person? | b) What is the full name of the person? | c) How is this person related to you?<br>[give examples if respondent is unsure about answer categories]                                                                                                     | d) What is the sex of this person? | e) Where does this person live?                                    | f) What is the name of the household head of this person? | g) How often do you interact with this person?                                                                                                                    | h) How do you interact with this person?<br><br>[Mark all that apply]                     |
| 14.1.<br>Contact 1                                                                | Name _____                             | Name _____                              | Spouse..... 1<br>Parent ..... 2<br>Child ..... 3<br>Sibling..... 4<br>Other relative ..... 5<br>Neighbour ..... 6<br>Friend (if not neighbour)..... 7<br>Other villager ..... 8<br>Other (specify) _ ..... 9 | Female ..1<br>Male .....0          | In village ..... 1<br>(specify: _____)<br><br>Outside village .. 2 | Name of household head<br>_____                           | Daily or more often .....4<br>Weekly or few times/week .....3<br>Monthly or few times/month ...2<br>Yearly or few times/year .....1<br>Less often or never .....0 | Face-to-face..... 1<br>Voice call ..... 2<br>Messenger ..... 3<br>Other (specify) _____ 4 |
| 14.2.<br>Contact n                                                                | Name                                   | Name                                    | 1 2 3 4 5 6 7 8 9                                                                                                                                                                                            | 1 0                                | 1 2                                                                | Name                                                      | 0 1 2 3 4                                                                                                                                                         | 1 2 3 4                                                                                   |

review only

| <p>15. Did you or a child in your household have an acute illness (not a chronic, long-term condition that comes again and again) or an accident in the last two months? If yes, I will ask you about these illnesses one-by-one. <i>[if no, continue with Question 19]</i></p>                                                                                                                          | No.....0 → [Q 16]<br>Yes.....1 ↓                                                                                                                                                                                                                                                                                                                                                                                                                                                                                                                                                                                                                                                                                                                                                                                                                                                                                                                                                                                                                                                                                                                                                                                                                                                                                                                                                                                                                                                                                                                                                                                                                                                                                                                                                                                                                                                                                                                                                                                                                                                                                                                                                                                                                                                                                                                                                                                                                                                                                                                                                                                                                                                                                                                                                                                                                                                                                                                                                                                                                                                                                                                                                                                                                                                                                                                                                                                                                                                                                                                                                                                                                                                                                                                                                                                                                                                                                                                                                                                                                                                               |           |          |                                                                                          |           |                             |            |                                                  |   |                                                |   |                                                  |   |                                     |   |                                           |   |                                              |   |                                          |   |                                        |   |                         |    |                                        |  |                |   |                                   |   |                     |   |                     |   |                      |   |                                 |   |                                                                                                                       |  |                |   |             |   |                    |   |                                      |   |                               |   |                                |   |                        |   |                            |   |                                                                                                      |  |           |          |          |           |           |            |            |  |                                                                                                                                                                                                                                                                                                |                                                                                                                                                                                                                                                                                                                 |                                                                                                                                                                                                      |                                                                                                                                                                                                                                                                                                                                                                                                                                                                                             |           |          |          |           |           |            |            |  |
|----------------------------------------------------------------------------------------------------------------------------------------------------------------------------------------------------------------------------------------------------------------------------------------------------------------------------------------------------------------------------------------------------------|------------------------------------------------------------------------------------------------------------------------------------------------------------------------------------------------------------------------------------------------------------------------------------------------------------------------------------------------------------------------------------------------------------------------------------------------------------------------------------------------------------------------------------------------------------------------------------------------------------------------------------------------------------------------------------------------------------------------------------------------------------------------------------------------------------------------------------------------------------------------------------------------------------------------------------------------------------------------------------------------------------------------------------------------------------------------------------------------------------------------------------------------------------------------------------------------------------------------------------------------------------------------------------------------------------------------------------------------------------------------------------------------------------------------------------------------------------------------------------------------------------------------------------------------------------------------------------------------------------------------------------------------------------------------------------------------------------------------------------------------------------------------------------------------------------------------------------------------------------------------------------------------------------------------------------------------------------------------------------------------------------------------------------------------------------------------------------------------------------------------------------------------------------------------------------------------------------------------------------------------------------------------------------------------------------------------------------------------------------------------------------------------------------------------------------------------------------------------------------------------------------------------------------------------------------------------------------------------------------------------------------------------------------------------------------------------------------------------------------------------------------------------------------------------------------------------------------------------------------------------------------------------------------------------------------------------------------------------------------------------------------------------------------------------------------------------------------------------------------------------------------------------------------------------------------------------------------------------------------------------------------------------------------------------------------------------------------------------------------------------------------------------------------------------------------------------------------------------------------------------------------------------------------------------------------------------------------------------------------------------------------------------------------------------------------------------------------------------------------------------------------------------------------------------------------------------------------------------------------------------------------------------------------------------------------------------------------------------------------------------------------------------------------------------------------------------------------------------|-----------|----------|------------------------------------------------------------------------------------------|-----------|-----------------------------|------------|--------------------------------------------------|---|------------------------------------------------|---|--------------------------------------------------|---|-------------------------------------|---|-------------------------------------------|---|----------------------------------------------|---|------------------------------------------|---|----------------------------------------|---|-------------------------|----|----------------------------------------|--|----------------|---|-----------------------------------|---|---------------------|---|---------------------|---|----------------------|---|---------------------------------|---|-----------------------------------------------------------------------------------------------------------------------|--|----------------|---|-------------|---|--------------------|---|--------------------------------------|---|-------------------------------|---|--------------------------------|---|------------------------|---|----------------------------|---|------------------------------------------------------------------------------------------------------|--|-----------|----------|----------|-----------|-----------|------------|------------|--|------------------------------------------------------------------------------------------------------------------------------------------------------------------------------------------------------------------------------------------------------------------------------------------------|-----------------------------------------------------------------------------------------------------------------------------------------------------------------------------------------------------------------------------------------------------------------------------------------------------------------|------------------------------------------------------------------------------------------------------------------------------------------------------------------------------------------------------|---------------------------------------------------------------------------------------------------------------------------------------------------------------------------------------------------------------------------------------------------------------------------------------------------------------------------------------------------------------------------------------------------------------------------------------------------------------------------------------------|-----------|----------|----------|-----------|-----------|------------|------------|--|
| <p><i>[if yes:]</i></p> <p>15.a [Confirm if this episode is for respondent or child]</p>                                                                                                                                                                                                                                                                                                                 | Respondent .....1 → [Q 15.1]<br>Child .....2                                                                                                                                                                                                                                                                                                                                                                                                                                                                                                                                                                                                                                                                                                                                                                                                                                                                                                                                                                                                                                                                                                                                                                                                                                                                                                                                                                                                                                                                                                                                                                                                                                                                                                                                                                                                                                                                                                                                                                                                                                                                                                                                                                                                                                                                                                                                                                                                                                                                                                                                                                                                                                                                                                                                                                                                                                                                                                                                                                                                                                                                                                                                                                                                                                                                                                                                                                                                                                                                                                                                                                                                                                                                                                                                                                                                                                                                                                                                                                                                                                                   |           |          |                                                                                          |           |                             |            |                                                  |   |                                                |   |                                                  |   |                                     |   |                                           |   |                                              |   |                                          |   |                                        |   |                         |    |                                        |  |                |   |                                   |   |                     |   |                     |   |                      |   |                                 |   |                                                                                                                       |  |                |   |             |   |                    |   |                                      |   |                               |   |                                |   |                        |   |                            |   |                                                                                                      |  |           |          |          |           |           |            |            |  |                                                                                                                                                                                                                                                                                                |                                                                                                                                                                                                                                                                                                                 |                                                                                                                                                                                                      |                                                                                                                                                                                                                                                                                                                                                                                                                                                                                             |           |          |          |           |           |            |            |  |
| <p>15.b How old is the child?</p>                                                                                                                                                                                                                                                                                                                                                                        | Age in years: _____                                                                                                                                                                                                                                                                                                                                                                                                                                                                                                                                                                                                                                                                                                                                                                                                                                                                                                                                                                                                                                                                                                                                                                                                                                                                                                                                                                                                                                                                                                                                                                                                                                                                                                                                                                                                                                                                                                                                                                                                                                                                                                                                                                                                                                                                                                                                                                                                                                                                                                                                                                                                                                                                                                                                                                                                                                                                                                                                                                                                                                                                                                                                                                                                                                                                                                                                                                                                                                                                                                                                                                                                                                                                                                                                                                                                                                                                                                                                                                                                                                                                            |           |          |                                                                                          |           |                             |            |                                                  |   |                                                |   |                                                  |   |                                     |   |                                           |   |                                              |   |                                          |   |                                        |   |                         |    |                                        |  |                |   |                                   |   |                     |   |                     |   |                      |   |                                 |   |                                                                                                                       |  |                |   |             |   |                    |   |                                      |   |                               |   |                                |   |                        |   |                            |   |                                                                                                      |  |           |          |          |           |           |            |            |  |                                                                                                                                                                                                                                                                                                |                                                                                                                                                                                                                                                                                                                 |                                                                                                                                                                                                      |                                                                                                                                                                                                                                                                                                                                                                                                                                                                                             |           |          |          |           |           |            |            |  |
| <p>15.c Is the child female or male</p>                                                                                                                                                                                                                                                                                                                                                                  | Female .....1<br>Male .....0                                                                                                                                                                                                                                                                                                                                                                                                                                                                                                                                                                                                                                                                                                                                                                                                                                                                                                                                                                                                                                                                                                                                                                                                                                                                                                                                                                                                                                                                                                                                                                                                                                                                                                                                                                                                                                                                                                                                                                                                                                                                                                                                                                                                                                                                                                                                                                                                                                                                                                                                                                                                                                                                                                                                                                                                                                                                                                                                                                                                                                                                                                                                                                                                                                                                                                                                                                                                                                                                                                                                                                                                                                                                                                                                                                                                                                                                                                                                                                                                                                                                   |           |          |                                                                                          |           |                             |            |                                                  |   |                                                |   |                                                  |   |                                     |   |                                           |   |                                              |   |                                          |   |                                        |   |                         |    |                                        |  |                |   |                                   |   |                     |   |                     |   |                      |   |                                 |   |                                                                                                                       |  |                |   |             |   |                    |   |                                      |   |                               |   |                                |   |                        |   |                            |   |                                                                                                      |  |           |          |          |           |           |            |            |  |                                                                                                                                                                                                                                                                                                |                                                                                                                                                                                                                                                                                                                 |                                                                                                                                                                                                      |                                                                                                                                                                                                                                                                                                                                                                                                                                                                                             |           |          |          |           |           |            |            |  |
| <p>15.1. Can you please describe the symptoms or problem in your own words?</p>                                                                                                                                                                                                                                                                                                                          | Description of condition: _____                                                                                                                                                                                                                                                                                                                                                                                                                                                                                                                                                                                                                                                                                                                                                                                                                                                                                                                                                                                                                                                                                                                                                                                                                                                                                                                                                                                                                                                                                                                                                                                                                                                                                                                                                                                                                                                                                                                                                                                                                                                                                                                                                                                                                                                                                                                                                                                                                                                                                                                                                                                                                                                                                                                                                                                                                                                                                                                                                                                                                                                                                                                                                                                                                                                                                                                                                                                                                                                                                                                                                                                                                                                                                                                                                                                                                                                                                                                                                                                                                                                                |           |          |                                                                                          |           |                             |            |                                                  |   |                                                |   |                                                  |   |                                     |   |                                           |   |                                              |   |                                          |   |                                        |   |                         |    |                                        |  |                |   |                                   |   |                     |   |                     |   |                      |   |                                 |   |                                                                                                                       |  |                |   |             |   |                    |   |                                      |   |                               |   |                                |   |                        |   |                            |   |                                                                                                      |  |           |          |          |           |           |            |            |  |                                                                                                                                                                                                                                                                                                |                                                                                                                                                                                                                                                                                                                 |                                                                                                                                                                                                      |                                                                                                                                                                                                                                                                                                                                                                                                                                                                                             |           |          |          |           |           |            |            |  |
| <p>15.2. Did [you / the child] receive a diagnosis of the illness from any medical provide, friend, or internet source?</p> <p>If so, can you please describe the diagnosis of the illness if you received any and where [you / the child] received it? <i>[note: the diagnosis might be given by any medical provider including untrained and informal. Record all diagnoses if more than one.]</i></p> | a) Diagnosis 1: _____ b) Medical provider 1: 1 2 3 4 5 6 7 8<br>a) Diagnosis n: _____ b) Medical provider n: 1 2 3 4 5 6 7 8<br><i>[Response codes]</i><br>Drug dispensary, other local store selling medicine .....1<br>Traditional healer.....2<br>Pharmacist .....3<br>Private clinic.....4<br>Private hospital.....5<br>Primary care unit .....6<br>Public hospital.....7<br>Other providers or Internet? Specify: .....8                                                                                                                                                                                                                                                                                                                                                                                                                                                                                                                                                                                                                                                                                                                                                                                                                                                                                                                                                                                                                                                                                                                                                                                                                                                                                                                                                                                                                                                                                                                                                                                                                                                                                                                                                                                                                                                                                                                                                                                                                                                                                                                                                                                                                                                                                                                                                                                                                                                                                                                                                                                                                                                                                                                                                                                                                                                                                                                                                                                                                                                                                                                                                                                                                                                                                                                                                                                                                                                                                                                                                                                                                                                                  |           |          |                                                                                          |           |                             |            |                                                  |   |                                                |   |                                                  |   |                                     |   |                                           |   |                                              |   |                                          |   |                                        |   |                         |    |                                        |  |                |   |                                   |   |                     |   |                     |   |                      |   |                                 |   |                                                                                                                       |  |                |   |             |   |                    |   |                                      |   |                               |   |                                |   |                        |   |                            |   |                                                                                                      |  |           |          |          |           |           |            |            |  |                                                                                                                                                                                                                                                                                                |                                                                                                                                                                                                                                                                                                                 |                                                                                                                                                                                                      |                                                                                                                                                                                                                                                                                                                                                                                                                                                                                             |           |          |          |           |           |            |            |  |
| <p>15.3. When did [you / the child] experience the accident/discomfort (for the first time)</p>                                                                                                                                                                                                                                                                                                          | Onset: ___ days / ___ weeks / ___ months ago                                                                                                                                                                                                                                                                                                                                                                                                                                                                                                                                                                                                                                                                                                                                                                                                                                                                                                                                                                                                                                                                                                                                                                                                                                                                                                                                                                                                                                                                                                                                                                                                                                                                                                                                                                                                                                                                                                                                                                                                                                                                                                                                                                                                                                                                                                                                                                                                                                                                                                                                                                                                                                                                                                                                                                                                                                                                                                                                                                                                                                                                                                                                                                                                                                                                                                                                                                                                                                                                                                                                                                                                                                                                                                                                                                                                                                                                                                                                                                                                                                                   |           |          |                                                                                          |           |                             |            |                                                  |   |                                                |   |                                                  |   |                                     |   |                                           |   |                                              |   |                                          |   |                                        |   |                         |    |                                        |  |                |   |                                   |   |                     |   |                     |   |                      |   |                                 |   |                                                                                                                       |  |                |   |             |   |                    |   |                                      |   |                               |   |                                |   |                        |   |                            |   |                                                                                                      |  |           |          |          |           |           |            |            |  |                                                                                                                                                                                                                                                                                                |                                                                                                                                                                                                                                                                                                                 |                                                                                                                                                                                                      |                                                                                                                                                                                                                                                                                                                                                                                                                                                                                             |           |          |          |           |           |            |            |  |
| <p>15.4. Would you describe the illness/accident as “mild,” “moderate,” or “severe”?</p>                                                                                                                                                                                                                                                                                                                 | Mild.....1<br>Moderate.....2<br>Severe.....3                                                                                                                                                                                                                                                                                                                                                                                                                                                                                                                                                                                                                                                                                                                                                                                                                                                                                                                                                                                                                                                                                                                                                                                                                                                                                                                                                                                                                                                                                                                                                                                                                                                                                                                                                                                                                                                                                                                                                                                                                                                                                                                                                                                                                                                                                                                                                                                                                                                                                                                                                                                                                                                                                                                                                                                                                                                                                                                                                                                                                                                                                                                                                                                                                                                                                                                                                                                                                                                                                                                                                                                                                                                                                                                                                                                                                                                                                                                                                                                                                                                   |           |          |                                                                                          |           |                             |            |                                                  |   |                                                |   |                                                  |   |                                     |   |                                           |   |                                              |   |                                          |   |                                        |   |                         |    |                                        |  |                |   |                                   |   |                     |   |                     |   |                      |   |                                 |   |                                                                                                                       |  |                |   |             |   |                    |   |                                      |   |                               |   |                                |   |                        |   |                            |   |                                                                                                      |  |           |          |          |           |           |            |            |  |                                                                                                                                                                                                                                                                                                |                                                                                                                                                                                                                                                                                                                 |                                                                                                                                                                                                      |                                                                                                                                                                                                                                                                                                                                                                                                                                                                                             |           |          |          |           |           |            |            |  |
| <p>15.5. Can you please explain the stages of the treatment? I will ask you step-by-step what you did, starting from the moment [you / the child] first experienced a discomfort.</p>                                                                                                                                                                                                                    |                                                                                                                                                                                                                                                                                                                                                                                                                                                                                                                                                                                                                                                                                                                                                                                                                                                                                                                                                                                                                                                                                                                                                                                                                                                                                                                                                                                                                                                                                                                                                                                                                                                                                                                                                                                                                                                                                                                                                                                                                                                                                                                                                                                                                                                                                                                                                                                                                                                                                                                                                                                                                                                                                                                                                                                                                                                                                                                                                                                                                                                                                                                                                                                                                                                                                                                                                                                                                                                                                                                                                                                                                                                                                                                                                                                                                                                                                                                                                                                                                                                                                                |           |          |                                                                                          |           |                             |            |                                                  |   |                                                |   |                                                  |   |                                     |   |                                           |   |                                              |   |                                          |   |                                        |   |                         |    |                                        |  |                |   |                                   |   |                     |   |                     |   |                      |   |                                 |   |                                                                                                                       |  |                |   |             |   |                    |   |                                      |   |                               |   |                                |   |                        |   |                            |   |                                                                                                      |  |           |          |          |           |           |            |            |  |                                                                                                                                                                                                                                                                                                |                                                                                                                                                                                                                                                                                                                 |                                                                                                                                                                                                      |                                                                                                                                                                                                                                                                                                                                                                                                                                                                                             |           |          |          |           |           |            |            |  |
| <p><b>15.5.1. Step 1 (detection)</b></p>                                                                                                                                                                                                                                                                                                                                                                 | <table border="1" style="width: 100%; border-collapse: collapse;"> <thead> <tr> <th style="width: 80%;"></th> <th style="width: 20%;">Step n</th> </tr> </thead> <tbody> <tr> <td>a) What kind of help or treatment did you get at this stage? <i>[if unsure, specify]</i></td> <td></td> </tr> <tr> <td>Ignored /did nothing .....1</td> <td>1</td> </tr> <tr> <td>Self-care (sleep, rest, medicine at home) .....2</td> <td>2</td> </tr> <tr> <td>Care from family and friends (full-time).....3</td> <td>3</td> </tr> <tr> <td>Treated/consulted at a traditional healer .....4</td> <td>4</td> </tr> <tr> <td>Treated/cons. at a pharmacist.....5</td> <td>5</td> </tr> <tr> <td>Treated/cons. at shop selling drugs.....6</td> <td>6</td> </tr> <tr> <td>Treated/cons. at priv. clinic/hospital.....7</td> <td>7</td> </tr> <tr> <td>Treated/cons. at primary care unit.....8</td> <td>8</td> </tr> <tr> <td>Treated/cons. at a gvt. Hospital.....9</td> <td>9</td> </tr> <tr> <td>Other (specify) _____10</td> <td>10</td> </tr> <tr> <td>b) Where did this activity take place?</td> <td></td> </tr> <tr> <td>At home .....1</td> <td>1</td> </tr> <tr> <td>Less than 10 min. from home.....2</td> <td>2</td> </tr> <tr> <td>10 to 29 min. ....3</td> <td>3</td> </tr> <tr> <td>30 to 59 min. ....4</td> <td>4</td> </tr> <tr> <td>60 to 119 min. ....5</td> <td>5</td> </tr> <tr> <td>2 hours or more from home.....6</td> <td>6</td> </tr> <tr> <td>c) How did [you / the child] get to the place of the activity? <i>[select “at home” according to prior responses]</i></td> <td></td> </tr> <tr> <td>At home .....1</td> <td>1</td> </tr> <tr> <td>Walk .....2</td> <td>2</td> </tr> <tr> <td>Own bicycle .....3</td> <td>3</td> </tr> <tr> <td>Own motorcycle / Three-wheeler.....4</td> <td>4</td> </tr> <tr> <td>Own car / four-wheeler .....5</td> <td>5</td> </tr> <tr> <td>Taxi or other hired ride.....6</td> <td>6</td> </tr> <tr> <td>Public transport.....7</td> <td>7</td> </tr> <tr> <td>Other (specify) ___ .....8</td> <td>8</td> </tr> <tr> <td>d) How long did this stage last? <i>[let respondent choose category; if &lt;1 day, code “1” day]</i></td> <td></td> </tr> <tr> <td style="text-align: center;">Duration:</td> <td style="text-align: center;">___ days</td> </tr> <tr> <td style="text-align: center;">___ days</td> <td style="text-align: center;">___ weeks</td> </tr> <tr> <td style="text-align: center;">___ weeks</td> <td style="text-align: center;">___ months</td> </tr> <tr> <td style="text-align: center;">___ months</td> <td></td> </tr> <tr> <td style="padding: 5px;"> <p>e) Can you please name or describe all the medicines that you received or were prescribed during this step?</p> <p><i>[include medicine stored at home if “self-care at home”] [continue for all medicines received, then complete Questions g to k for each medicine individually]</i></p> </td> <td style="padding: 5px;"> <div style="display: flex; align-items: center;">  <div> <p>Medicine 1:<br/>Name/description: _____</p> <p>Medicine n:<br/>Name/description: _____</p> </div> </div> </td> </tr> <tr> <td style="padding: 5px;"> <p>f) For how long did [you / the child] take the medicine? <i>[let respondent choose category; if more than one repeated episode, indicate total duration] [for each medicine individually]</i></p> </td> <td style="padding: 5px;"> <table border="1" style="width: 100%; border-collapse: collapse;"> <tbody> <tr> <td style="text-align: center;">Duration:</td> <td style="text-align: center;">___ days</td> </tr> <tr> <td style="text-align: center;">___ days</td> <td style="text-align: center;">___ weeks</td> </tr> <tr> <td style="text-align: center;">___ weeks</td> <td style="text-align: center;">___ months</td> </tr> <tr> <td style="text-align: center;">___ months</td> <td></td> </tr> </tbody> </table> </td> </tr> </tbody></table> |           | Step n   | a) What kind of help or treatment did you get at this stage? <i>[if unsure, specify]</i> |           | Ignored /did nothing .....1 | 1          | Self-care (sleep, rest, medicine at home) .....2 | 2 | Care from family and friends (full-time).....3 | 3 | Treated/consulted at a traditional healer .....4 | 4 | Treated/cons. at a pharmacist.....5 | 5 | Treated/cons. at shop selling drugs.....6 | 6 | Treated/cons. at priv. clinic/hospital.....7 | 7 | Treated/cons. at primary care unit.....8 | 8 | Treated/cons. at a gvt. Hospital.....9 | 9 | Other (specify) _____10 | 10 | b) Where did this activity take place? |  | At home .....1 | 1 | Less than 10 min. from home.....2 | 2 | 10 to 29 min. ....3 | 3 | 30 to 59 min. ....4 | 4 | 60 to 119 min. ....5 | 5 | 2 hours or more from home.....6 | 6 | c) How did [you / the child] get to the place of the activity? <i>[select “at home” according to prior responses]</i> |  | At home .....1 | 1 | Walk .....2 | 2 | Own bicycle .....3 | 3 | Own motorcycle / Three-wheeler.....4 | 4 | Own car / four-wheeler .....5 | 5 | Taxi or other hired ride.....6 | 6 | Public transport.....7 | 7 | Other (specify) ___ .....8 | 8 | d) How long did this stage last? <i>[let respondent choose category; if &lt;1 day, code “1” day]</i> |  | Duration: | ___ days | ___ days | ___ weeks | ___ weeks | ___ months | ___ months |  | <p>e) Can you please name or describe all the medicines that you received or were prescribed during this step?</p> <p><i>[include medicine stored at home if “self-care at home”] [continue for all medicines received, then complete Questions g to k for each medicine individually]</i></p> | <div style="display: flex; align-items: center;">  <div> <p>Medicine 1:<br/>Name/description: _____</p> <p>Medicine n:<br/>Name/description: _____</p> </div> </div> | <p>f) For how long did [you / the child] take the medicine? <i>[let respondent choose category; if more than one repeated episode, indicate total duration] [for each medicine individually]</i></p> | <table border="1" style="width: 100%; border-collapse: collapse;"> <tbody> <tr> <td style="text-align: center;">Duration:</td> <td style="text-align: center;">___ days</td> </tr> <tr> <td style="text-align: center;">___ days</td> <td style="text-align: center;">___ weeks</td> </tr> <tr> <td style="text-align: center;">___ weeks</td> <td style="text-align: center;">___ months</td> </tr> <tr> <td style="text-align: center;">___ months</td> <td></td> </tr> </tbody> </table> | Duration: | ___ days | ___ days | ___ weeks | ___ weeks | ___ months | ___ months |  |
|                                                                                                                                                                                                                                                                                                                                                                                                          | Step n                                                                                                                                                                                                                                                                                                                                                                                                                                                                                                                                                                                                                                                                                                                                                                                                                                                                                                                                                                                                                                                                                                                                                                                                                                                                                                                                                                                                                                                                                                                                                                                                                                                                                                                                                                                                                                                                                                                                                                                                                                                                                                                                                                                                                                                                                                                                                                                                                                                                                                                                                                                                                                                                                                                                                                                                                                                                                                                                                                                                                                                                                                                                                                                                                                                                                                                                                                                                                                                                                                                                                                                                                                                                                                                                                                                                                                                                                                                                                                                                                                                                                         |           |          |                                                                                          |           |                             |            |                                                  |   |                                                |   |                                                  |   |                                     |   |                                           |   |                                              |   |                                          |   |                                        |   |                         |    |                                        |  |                |   |                                   |   |                     |   |                     |   |                      |   |                                 |   |                                                                                                                       |  |                |   |             |   |                    |   |                                      |   |                               |   |                                |   |                        |   |                            |   |                                                                                                      |  |           |          |          |           |           |            |            |  |                                                                                                                                                                                                                                                                                                |                                                                                                                                                                                                                                                                                                                 |                                                                                                                                                                                                      |                                                                                                                                                                                                                                                                                                                                                                                                                                                                                             |           |          |          |           |           |            |            |  |
| a) What kind of help or treatment did you get at this stage? <i>[if unsure, specify]</i>                                                                                                                                                                                                                                                                                                                 |                                                                                                                                                                                                                                                                                                                                                                                                                                                                                                                                                                                                                                                                                                                                                                                                                                                                                                                                                                                                                                                                                                                                                                                                                                                                                                                                                                                                                                                                                                                                                                                                                                                                                                                                                                                                                                                                                                                                                                                                                                                                                                                                                                                                                                                                                                                                                                                                                                                                                                                                                                                                                                                                                                                                                                                                                                                                                                                                                                                                                                                                                                                                                                                                                                                                                                                                                                                                                                                                                                                                                                                                                                                                                                                                                                                                                                                                                                                                                                                                                                                                                                |           |          |                                                                                          |           |                             |            |                                                  |   |                                                |   |                                                  |   |                                     |   |                                           |   |                                              |   |                                          |   |                                        |   |                         |    |                                        |  |                |   |                                   |   |                     |   |                     |   |                      |   |                                 |   |                                                                                                                       |  |                |   |             |   |                    |   |                                      |   |                               |   |                                |   |                        |   |                            |   |                                                                                                      |  |           |          |          |           |           |            |            |  |                                                                                                                                                                                                                                                                                                |                                                                                                                                                                                                                                                                                                                 |                                                                                                                                                                                                      |                                                                                                                                                                                                                                                                                                                                                                                                                                                                                             |           |          |          |           |           |            |            |  |
| Ignored /did nothing .....1                                                                                                                                                                                                                                                                                                                                                                              | 1                                                                                                                                                                                                                                                                                                                                                                                                                                                                                                                                                                                                                                                                                                                                                                                                                                                                                                                                                                                                                                                                                                                                                                                                                                                                                                                                                                                                                                                                                                                                                                                                                                                                                                                                                                                                                                                                                                                                                                                                                                                                                                                                                                                                                                                                                                                                                                                                                                                                                                                                                                                                                                                                                                                                                                                                                                                                                                                                                                                                                                                                                                                                                                                                                                                                                                                                                                                                                                                                                                                                                                                                                                                                                                                                                                                                                                                                                                                                                                                                                                                                                              |           |          |                                                                                          |           |                             |            |                                                  |   |                                                |   |                                                  |   |                                     |   |                                           |   |                                              |   |                                          |   |                                        |   |                         |    |                                        |  |                |   |                                   |   |                     |   |                     |   |                      |   |                                 |   |                                                                                                                       |  |                |   |             |   |                    |   |                                      |   |                               |   |                                |   |                        |   |                            |   |                                                                                                      |  |           |          |          |           |           |            |            |  |                                                                                                                                                                                                                                                                                                |                                                                                                                                                                                                                                                                                                                 |                                                                                                                                                                                                      |                                                                                                                                                                                                                                                                                                                                                                                                                                                                                             |           |          |          |           |           |            |            |  |
| Self-care (sleep, rest, medicine at home) .....2                                                                                                                                                                                                                                                                                                                                                         | 2                                                                                                                                                                                                                                                                                                                                                                                                                                                                                                                                                                                                                                                                                                                                                                                                                                                                                                                                                                                                                                                                                                                                                                                                                                                                                                                                                                                                                                                                                                                                                                                                                                                                                                                                                                                                                                                                                                                                                                                                                                                                                                                                                                                                                                                                                                                                                                                                                                                                                                                                                                                                                                                                                                                                                                                                                                                                                                                                                                                                                                                                                                                                                                                                                                                                                                                                                                                                                                                                                                                                                                                                                                                                                                                                                                                                                                                                                                                                                                                                                                                                                              |           |          |                                                                                          |           |                             |            |                                                  |   |                                                |   |                                                  |   |                                     |   |                                           |   |                                              |   |                                          |   |                                        |   |                         |    |                                        |  |                |   |                                   |   |                     |   |                     |   |                      |   |                                 |   |                                                                                                                       |  |                |   |             |   |                    |   |                                      |   |                               |   |                                |   |                        |   |                            |   |                                                                                                      |  |           |          |          |           |           |            |            |  |                                                                                                                                                                                                                                                                                                |                                                                                                                                                                                                                                                                                                                 |                                                                                                                                                                                                      |                                                                                                                                                                                                                                                                                                                                                                                                                                                                                             |           |          |          |           |           |            |            |  |
| Care from family and friends (full-time).....3                                                                                                                                                                                                                                                                                                                                                           | 3                                                                                                                                                                                                                                                                                                                                                                                                                                                                                                                                                                                                                                                                                                                                                                                                                                                                                                                                                                                                                                                                                                                                                                                                                                                                                                                                                                                                                                                                                                                                                                                                                                                                                                                                                                                                                                                                                                                                                                                                                                                                                                                                                                                                                                                                                                                                                                                                                                                                                                                                                                                                                                                                                                                                                                                                                                                                                                                                                                                                                                                                                                                                                                                                                                                                                                                                                                                                                                                                                                                                                                                                                                                                                                                                                                                                                                                                                                                                                                                                                                                                                              |           |          |                                                                                          |           |                             |            |                                                  |   |                                                |   |                                                  |   |                                     |   |                                           |   |                                              |   |                                          |   |                                        |   |                         |    |                                        |  |                |   |                                   |   |                     |   |                     |   |                      |   |                                 |   |                                                                                                                       |  |                |   |             |   |                    |   |                                      |   |                               |   |                                |   |                        |   |                            |   |                                                                                                      |  |           |          |          |           |           |            |            |  |                                                                                                                                                                                                                                                                                                |                                                                                                                                                                                                                                                                                                                 |                                                                                                                                                                                                      |                                                                                                                                                                                                                                                                                                                                                                                                                                                                                             |           |          |          |           |           |            |            |  |
| Treated/consulted at a traditional healer .....4                                                                                                                                                                                                                                                                                                                                                         | 4                                                                                                                                                                                                                                                                                                                                                                                                                                                                                                                                                                                                                                                                                                                                                                                                                                                                                                                                                                                                                                                                                                                                                                                                                                                                                                                                                                                                                                                                                                                                                                                                                                                                                                                                                                                                                                                                                                                                                                                                                                                                                                                                                                                                                                                                                                                                                                                                                                                                                                                                                                                                                                                                                                                                                                                                                                                                                                                                                                                                                                                                                                                                                                                                                                                                                                                                                                                                                                                                                                                                                                                                                                                                                                                                                                                                                                                                                                                                                                                                                                                                                              |           |          |                                                                                          |           |                             |            |                                                  |   |                                                |   |                                                  |   |                                     |   |                                           |   |                                              |   |                                          |   |                                        |   |                         |    |                                        |  |                |   |                                   |   |                     |   |                     |   |                      |   |                                 |   |                                                                                                                       |  |                |   |             |   |                    |   |                                      |   |                               |   |                                |   |                        |   |                            |   |                                                                                                      |  |           |          |          |           |           |            |            |  |                                                                                                                                                                                                                                                                                                |                                                                                                                                                                                                                                                                                                                 |                                                                                                                                                                                                      |                                                                                                                                                                                                                                                                                                                                                                                                                                                                                             |           |          |          |           |           |            |            |  |
| Treated/cons. at a pharmacist.....5                                                                                                                                                                                                                                                                                                                                                                      | 5                                                                                                                                                                                                                                                                                                                                                                                                                                                                                                                                                                                                                                                                                                                                                                                                                                                                                                                                                                                                                                                                                                                                                                                                                                                                                                                                                                                                                                                                                                                                                                                                                                                                                                                                                                                                                                                                                                                                                                                                                                                                                                                                                                                                                                                                                                                                                                                                                                                                                                                                                                                                                                                                                                                                                                                                                                                                                                                                                                                                                                                                                                                                                                                                                                                                                                                                                                                                                                                                                                                                                                                                                                                                                                                                                                                                                                                                                                                                                                                                                                                                                              |           |          |                                                                                          |           |                             |            |                                                  |   |                                                |   |                                                  |   |                                     |   |                                           |   |                                              |   |                                          |   |                                        |   |                         |    |                                        |  |                |   |                                   |   |                     |   |                     |   |                      |   |                                 |   |                                                                                                                       |  |                |   |             |   |                    |   |                                      |   |                               |   |                                |   |                        |   |                            |   |                                                                                                      |  |           |          |          |           |           |            |            |  |                                                                                                                                                                                                                                                                                                |                                                                                                                                                                                                                                                                                                                 |                                                                                                                                                                                                      |                                                                                                                                                                                                                                                                                                                                                                                                                                                                                             |           |          |          |           |           |            |            |  |
| Treated/cons. at shop selling drugs.....6                                                                                                                                                                                                                                                                                                                                                                | 6                                                                                                                                                                                                                                                                                                                                                                                                                                                                                                                                                                                                                                                                                                                                                                                                                                                                                                                                                                                                                                                                                                                                                                                                                                                                                                                                                                                                                                                                                                                                                                                                                                                                                                                                                                                                                                                                                                                                                                                                                                                                                                                                                                                                                                                                                                                                                                                                                                                                                                                                                                                                                                                                                                                                                                                                                                                                                                                                                                                                                                                                                                                                                                                                                                                                                                                                                                                                                                                                                                                                                                                                                                                                                                                                                                                                                                                                                                                                                                                                                                                                                              |           |          |                                                                                          |           |                             |            |                                                  |   |                                                |   |                                                  |   |                                     |   |                                           |   |                                              |   |                                          |   |                                        |   |                         |    |                                        |  |                |   |                                   |   |                     |   |                     |   |                      |   |                                 |   |                                                                                                                       |  |                |   |             |   |                    |   |                                      |   |                               |   |                                |   |                        |   |                            |   |                                                                                                      |  |           |          |          |           |           |            |            |  |                                                                                                                                                                                                                                                                                                |                                                                                                                                                                                                                                                                                                                 |                                                                                                                                                                                                      |                                                                                                                                                                                                                                                                                                                                                                                                                                                                                             |           |          |          |           |           |            |            |  |
| Treated/cons. at priv. clinic/hospital.....7                                                                                                                                                                                                                                                                                                                                                             | 7                                                                                                                                                                                                                                                                                                                                                                                                                                                                                                                                                                                                                                                                                                                                                                                                                                                                                                                                                                                                                                                                                                                                                                                                                                                                                                                                                                                                                                                                                                                                                                                                                                                                                                                                                                                                                                                                                                                                                                                                                                                                                                                                                                                                                                                                                                                                                                                                                                                                                                                                                                                                                                                                                                                                                                                                                                                                                                                                                                                                                                                                                                                                                                                                                                                                                                                                                                                                                                                                                                                                                                                                                                                                                                                                                                                                                                                                                                                                                                                                                                                                                              |           |          |                                                                                          |           |                             |            |                                                  |   |                                                |   |                                                  |   |                                     |   |                                           |   |                                              |   |                                          |   |                                        |   |                         |    |                                        |  |                |   |                                   |   |                     |   |                     |   |                      |   |                                 |   |                                                                                                                       |  |                |   |             |   |                    |   |                                      |   |                               |   |                                |   |                        |   |                            |   |                                                                                                      |  |           |          |          |           |           |            |            |  |                                                                                                                                                                                                                                                                                                |                                                                                                                                                                                                                                                                                                                 |                                                                                                                                                                                                      |                                                                                                                                                                                                                                                                                                                                                                                                                                                                                             |           |          |          |           |           |            |            |  |
| Treated/cons. at primary care unit.....8                                                                                                                                                                                                                                                                                                                                                                 | 8                                                                                                                                                                                                                                                                                                                                                                                                                                                                                                                                                                                                                                                                                                                                                                                                                                                                                                                                                                                                                                                                                                                                                                                                                                                                                                                                                                                                                                                                                                                                                                                                                                                                                                                                                                                                                                                                                                                                                                                                                                                                                                                                                                                                                                                                                                                                                                                                                                                                                                                                                                                                                                                                                                                                                                                                                                                                                                                                                                                                                                                                                                                                                                                                                                                                                                                                                                                                                                                                                                                                                                                                                                                                                                                                                                                                                                                                                                                                                                                                                                                                                              |           |          |                                                                                          |           |                             |            |                                                  |   |                                                |   |                                                  |   |                                     |   |                                           |   |                                              |   |                                          |   |                                        |   |                         |    |                                        |  |                |   |                                   |   |                     |   |                     |   |                      |   |                                 |   |                                                                                                                       |  |                |   |             |   |                    |   |                                      |   |                               |   |                                |   |                        |   |                            |   |                                                                                                      |  |           |          |          |           |           |            |            |  |                                                                                                                                                                                                                                                                                                |                                                                                                                                                                                                                                                                                                                 |                                                                                                                                                                                                      |                                                                                                                                                                                                                                                                                                                                                                                                                                                                                             |           |          |          |           |           |            |            |  |
| Treated/cons. at a gvt. Hospital.....9                                                                                                                                                                                                                                                                                                                                                                   | 9                                                                                                                                                                                                                                                                                                                                                                                                                                                                                                                                                                                                                                                                                                                                                                                                                                                                                                                                                                                                                                                                                                                                                                                                                                                                                                                                                                                                                                                                                                                                                                                                                                                                                                                                                                                                                                                                                                                                                                                                                                                                                                                                                                                                                                                                                                                                                                                                                                                                                                                                                                                                                                                                                                                                                                                                                                                                                                                                                                                                                                                                                                                                                                                                                                                                                                                                                                                                                                                                                                                                                                                                                                                                                                                                                                                                                                                                                                                                                                                                                                                                                              |           |          |                                                                                          |           |                             |            |                                                  |   |                                                |   |                                                  |   |                                     |   |                                           |   |                                              |   |                                          |   |                                        |   |                         |    |                                        |  |                |   |                                   |   |                     |   |                     |   |                      |   |                                 |   |                                                                                                                       |  |                |   |             |   |                    |   |                                      |   |                               |   |                                |   |                        |   |                            |   |                                                                                                      |  |           |          |          |           |           |            |            |  |                                                                                                                                                                                                                                                                                                |                                                                                                                                                                                                                                                                                                                 |                                                                                                                                                                                                      |                                                                                                                                                                                                                                                                                                                                                                                                                                                                                             |           |          |          |           |           |            |            |  |
| Other (specify) _____10                                                                                                                                                                                                                                                                                                                                                                                  | 10                                                                                                                                                                                                                                                                                                                                                                                                                                                                                                                                                                                                                                                                                                                                                                                                                                                                                                                                                                                                                                                                                                                                                                                                                                                                                                                                                                                                                                                                                                                                                                                                                                                                                                                                                                                                                                                                                                                                                                                                                                                                                                                                                                                                                                                                                                                                                                                                                                                                                                                                                                                                                                                                                                                                                                                                                                                                                                                                                                                                                                                                                                                                                                                                                                                                                                                                                                                                                                                                                                                                                                                                                                                                                                                                                                                                                                                                                                                                                                                                                                                                                             |           |          |                                                                                          |           |                             |            |                                                  |   |                                                |   |                                                  |   |                                     |   |                                           |   |                                              |   |                                          |   |                                        |   |                         |    |                                        |  |                |   |                                   |   |                     |   |                     |   |                      |   |                                 |   |                                                                                                                       |  |                |   |             |   |                    |   |                                      |   |                               |   |                                |   |                        |   |                            |   |                                                                                                      |  |           |          |          |           |           |            |            |  |                                                                                                                                                                                                                                                                                                |                                                                                                                                                                                                                                                                                                                 |                                                                                                                                                                                                      |                                                                                                                                                                                                                                                                                                                                                                                                                                                                                             |           |          |          |           |           |            |            |  |
| b) Where did this activity take place?                                                                                                                                                                                                                                                                                                                                                                   |                                                                                                                                                                                                                                                                                                                                                                                                                                                                                                                                                                                                                                                                                                                                                                                                                                                                                                                                                                                                                                                                                                                                                                                                                                                                                                                                                                                                                                                                                                                                                                                                                                                                                                                                                                                                                                                                                                                                                                                                                                                                                                                                                                                                                                                                                                                                                                                                                                                                                                                                                                                                                                                                                                                                                                                                                                                                                                                                                                                                                                                                                                                                                                                                                                                                                                                                                                                                                                                                                                                                                                                                                                                                                                                                                                                                                                                                                                                                                                                                                                                                                                |           |          |                                                                                          |           |                             |            |                                                  |   |                                                |   |                                                  |   |                                     |   |                                           |   |                                              |   |                                          |   |                                        |   |                         |    |                                        |  |                |   |                                   |   |                     |   |                     |   |                      |   |                                 |   |                                                                                                                       |  |                |   |             |   |                    |   |                                      |   |                               |   |                                |   |                        |   |                            |   |                                                                                                      |  |           |          |          |           |           |            |            |  |                                                                                                                                                                                                                                                                                                |                                                                                                                                                                                                                                                                                                                 |                                                                                                                                                                                                      |                                                                                                                                                                                                                                                                                                                                                                                                                                                                                             |           |          |          |           |           |            |            |  |
| At home .....1                                                                                                                                                                                                                                                                                                                                                                                           | 1                                                                                                                                                                                                                                                                                                                                                                                                                                                                                                                                                                                                                                                                                                                                                                                                                                                                                                                                                                                                                                                                                                                                                                                                                                                                                                                                                                                                                                                                                                                                                                                                                                                                                                                                                                                                                                                                                                                                                                                                                                                                                                                                                                                                                                                                                                                                                                                                                                                                                                                                                                                                                                                                                                                                                                                                                                                                                                                                                                                                                                                                                                                                                                                                                                                                                                                                                                                                                                                                                                                                                                                                                                                                                                                                                                                                                                                                                                                                                                                                                                                                                              |           |          |                                                                                          |           |                             |            |                                                  |   |                                                |   |                                                  |   |                                     |   |                                           |   |                                              |   |                                          |   |                                        |   |                         |    |                                        |  |                |   |                                   |   |                     |   |                     |   |                      |   |                                 |   |                                                                                                                       |  |                |   |             |   |                    |   |                                      |   |                               |   |                                |   |                        |   |                            |   |                                                                                                      |  |           |          |          |           |           |            |            |  |                                                                                                                                                                                                                                                                                                |                                                                                                                                                                                                                                                                                                                 |                                                                                                                                                                                                      |                                                                                                                                                                                                                                                                                                                                                                                                                                                                                             |           |          |          |           |           |            |            |  |
| Less than 10 min. from home.....2                                                                                                                                                                                                                                                                                                                                                                        | 2                                                                                                                                                                                                                                                                                                                                                                                                                                                                                                                                                                                                                                                                                                                                                                                                                                                                                                                                                                                                                                                                                                                                                                                                                                                                                                                                                                                                                                                                                                                                                                                                                                                                                                                                                                                                                                                                                                                                                                                                                                                                                                                                                                                                                                                                                                                                                                                                                                                                                                                                                                                                                                                                                                                                                                                                                                                                                                                                                                                                                                                                                                                                                                                                                                                                                                                                                                                                                                                                                                                                                                                                                                                                                                                                                                                                                                                                                                                                                                                                                                                                                              |           |          |                                                                                          |           |                             |            |                                                  |   |                                                |   |                                                  |   |                                     |   |                                           |   |                                              |   |                                          |   |                                        |   |                         |    |                                        |  |                |   |                                   |   |                     |   |                     |   |                      |   |                                 |   |                                                                                                                       |  |                |   |             |   |                    |   |                                      |   |                               |   |                                |   |                        |   |                            |   |                                                                                                      |  |           |          |          |           |           |            |            |  |                                                                                                                                                                                                                                                                                                |                                                                                                                                                                                                                                                                                                                 |                                                                                                                                                                                                      |                                                                                                                                                                                                                                                                                                                                                                                                                                                                                             |           |          |          |           |           |            |            |  |
| 10 to 29 min. ....3                                                                                                                                                                                                                                                                                                                                                                                      | 3                                                                                                                                                                                                                                                                                                                                                                                                                                                                                                                                                                                                                                                                                                                                                                                                                                                                                                                                                                                                                                                                                                                                                                                                                                                                                                                                                                                                                                                                                                                                                                                                                                                                                                                                                                                                                                                                                                                                                                                                                                                                                                                                                                                                                                                                                                                                                                                                                                                                                                                                                                                                                                                                                                                                                                                                                                                                                                                                                                                                                                                                                                                                                                                                                                                                                                                                                                                                                                                                                                                                                                                                                                                                                                                                                                                                                                                                                                                                                                                                                                                                                              |           |          |                                                                                          |           |                             |            |                                                  |   |                                                |   |                                                  |   |                                     |   |                                           |   |                                              |   |                                          |   |                                        |   |                         |    |                                        |  |                |   |                                   |   |                     |   |                     |   |                      |   |                                 |   |                                                                                                                       |  |                |   |             |   |                    |   |                                      |   |                               |   |                                |   |                        |   |                            |   |                                                                                                      |  |           |          |          |           |           |            |            |  |                                                                                                                                                                                                                                                                                                |                                                                                                                                                                                                                                                                                                                 |                                                                                                                                                                                                      |                                                                                                                                                                                                                                                                                                                                                                                                                                                                                             |           |          |          |           |           |            |            |  |
| 30 to 59 min. ....4                                                                                                                                                                                                                                                                                                                                                                                      | 4                                                                                                                                                                                                                                                                                                                                                                                                                                                                                                                                                                                                                                                                                                                                                                                                                                                                                                                                                                                                                                                                                                                                                                                                                                                                                                                                                                                                                                                                                                                                                                                                                                                                                                                                                                                                                                                                                                                                                                                                                                                                                                                                                                                                                                                                                                                                                                                                                                                                                                                                                                                                                                                                                                                                                                                                                                                                                                                                                                                                                                                                                                                                                                                                                                                                                                                                                                                                                                                                                                                                                                                                                                                                                                                                                                                                                                                                                                                                                                                                                                                                                              |           |          |                                                                                          |           |                             |            |                                                  |   |                                                |   |                                                  |   |                                     |   |                                           |   |                                              |   |                                          |   |                                        |   |                         |    |                                        |  |                |   |                                   |   |                     |   |                     |   |                      |   |                                 |   |                                                                                                                       |  |                |   |             |   |                    |   |                                      |   |                               |   |                                |   |                        |   |                            |   |                                                                                                      |  |           |          |          |           |           |            |            |  |                                                                                                                                                                                                                                                                                                |                                                                                                                                                                                                                                                                                                                 |                                                                                                                                                                                                      |                                                                                                                                                                                                                                                                                                                                                                                                                                                                                             |           |          |          |           |           |            |            |  |
| 60 to 119 min. ....5                                                                                                                                                                                                                                                                                                                                                                                     | 5                                                                                                                                                                                                                                                                                                                                                                                                                                                                                                                                                                                                                                                                                                                                                                                                                                                                                                                                                                                                                                                                                                                                                                                                                                                                                                                                                                                                                                                                                                                                                                                                                                                                                                                                                                                                                                                                                                                                                                                                                                                                                                                                                                                                                                                                                                                                                                                                                                                                                                                                                                                                                                                                                                                                                                                                                                                                                                                                                                                                                                                                                                                                                                                                                                                                                                                                                                                                                                                                                                                                                                                                                                                                                                                                                                                                                                                                                                                                                                                                                                                                                              |           |          |                                                                                          |           |                             |            |                                                  |   |                                                |   |                                                  |   |                                     |   |                                           |   |                                              |   |                                          |   |                                        |   |                         |    |                                        |  |                |   |                                   |   |                     |   |                     |   |                      |   |                                 |   |                                                                                                                       |  |                |   |             |   |                    |   |                                      |   |                               |   |                                |   |                        |   |                            |   |                                                                                                      |  |           |          |          |           |           |            |            |  |                                                                                                                                                                                                                                                                                                |                                                                                                                                                                                                                                                                                                                 |                                                                                                                                                                                                      |                                                                                                                                                                                                                                                                                                                                                                                                                                                                                             |           |          |          |           |           |            |            |  |
| 2 hours or more from home.....6                                                                                                                                                                                                                                                                                                                                                                          | 6                                                                                                                                                                                                                                                                                                                                                                                                                                                                                                                                                                                                                                                                                                                                                                                                                                                                                                                                                                                                                                                                                                                                                                                                                                                                                                                                                                                                                                                                                                                                                                                                                                                                                                                                                                                                                                                                                                                                                                                                                                                                                                                                                                                                                                                                                                                                                                                                                                                                                                                                                                                                                                                                                                                                                                                                                                                                                                                                                                                                                                                                                                                                                                                                                                                                                                                                                                                                                                                                                                                                                                                                                                                                                                                                                                                                                                                                                                                                                                                                                                                                                              |           |          |                                                                                          |           |                             |            |                                                  |   |                                                |   |                                                  |   |                                     |   |                                           |   |                                              |   |                                          |   |                                        |   |                         |    |                                        |  |                |   |                                   |   |                     |   |                     |   |                      |   |                                 |   |                                                                                                                       |  |                |   |             |   |                    |   |                                      |   |                               |   |                                |   |                        |   |                            |   |                                                                                                      |  |           |          |          |           |           |            |            |  |                                                                                                                                                                                                                                                                                                |                                                                                                                                                                                                                                                                                                                 |                                                                                                                                                                                                      |                                                                                                                                                                                                                                                                                                                                                                                                                                                                                             |           |          |          |           |           |            |            |  |
| c) How did [you / the child] get to the place of the activity? <i>[select “at home” according to prior responses]</i>                                                                                                                                                                                                                                                                                    |                                                                                                                                                                                                                                                                                                                                                                                                                                                                                                                                                                                                                                                                                                                                                                                                                                                                                                                                                                                                                                                                                                                                                                                                                                                                                                                                                                                                                                                                                                                                                                                                                                                                                                                                                                                                                                                                                                                                                                                                                                                                                                                                                                                                                                                                                                                                                                                                                                                                                                                                                                                                                                                                                                                                                                                                                                                                                                                                                                                                                                                                                                                                                                                                                                                                                                                                                                                                                                                                                                                                                                                                                                                                                                                                                                                                                                                                                                                                                                                                                                                                                                |           |          |                                                                                          |           |                             |            |                                                  |   |                                                |   |                                                  |   |                                     |   |                                           |   |                                              |   |                                          |   |                                        |   |                         |    |                                        |  |                |   |                                   |   |                     |   |                     |   |                      |   |                                 |   |                                                                                                                       |  |                |   |             |   |                    |   |                                      |   |                               |   |                                |   |                        |   |                            |   |                                                                                                      |  |           |          |          |           |           |            |            |  |                                                                                                                                                                                                                                                                                                |                                                                                                                                                                                                                                                                                                                 |                                                                                                                                                                                                      |                                                                                                                                                                                                                                                                                                                                                                                                                                                                                             |           |          |          |           |           |            |            |  |
| At home .....1                                                                                                                                                                                                                                                                                                                                                                                           | 1                                                                                                                                                                                                                                                                                                                                                                                                                                                                                                                                                                                                                                                                                                                                                                                                                                                                                                                                                                                                                                                                                                                                                                                                                                                                                                                                                                                                                                                                                                                                                                                                                                                                                                                                                                                                                                                                                                                                                                                                                                                                                                                                                                                                                                                                                                                                                                                                                                                                                                                                                                                                                                                                                                                                                                                                                                                                                                                                                                                                                                                                                                                                                                                                                                                                                                                                                                                                                                                                                                                                                                                                                                                                                                                                                                                                                                                                                                                                                                                                                                                                                              |           |          |                                                                                          |           |                             |            |                                                  |   |                                                |   |                                                  |   |                                     |   |                                           |   |                                              |   |                                          |   |                                        |   |                         |    |                                        |  |                |   |                                   |   |                     |   |                     |   |                      |   |                                 |   |                                                                                                                       |  |                |   |             |   |                    |   |                                      |   |                               |   |                                |   |                        |   |                            |   |                                                                                                      |  |           |          |          |           |           |            |            |  |                                                                                                                                                                                                                                                                                                |                                                                                                                                                                                                                                                                                                                 |                                                                                                                                                                                                      |                                                                                                                                                                                                                                                                                                                                                                                                                                                                                             |           |          |          |           |           |            |            |  |
| Walk .....2                                                                                                                                                                                                                                                                                                                                                                                              | 2                                                                                                                                                                                                                                                                                                                                                                                                                                                                                                                                                                                                                                                                                                                                                                                                                                                                                                                                                                                                                                                                                                                                                                                                                                                                                                                                                                                                                                                                                                                                                                                                                                                                                                                                                                                                                                                                                                                                                                                                                                                                                                                                                                                                                                                                                                                                                                                                                                                                                                                                                                                                                                                                                                                                                                                                                                                                                                                                                                                                                                                                                                                                                                                                                                                                                                                                                                                                                                                                                                                                                                                                                                                                                                                                                                                                                                                                                                                                                                                                                                                                                              |           |          |                                                                                          |           |                             |            |                                                  |   |                                                |   |                                                  |   |                                     |   |                                           |   |                                              |   |                                          |   |                                        |   |                         |    |                                        |  |                |   |                                   |   |                     |   |                     |   |                      |   |                                 |   |                                                                                                                       |  |                |   |             |   |                    |   |                                      |   |                               |   |                                |   |                        |   |                            |   |                                                                                                      |  |           |          |          |           |           |            |            |  |                                                                                                                                                                                                                                                                                                |                                                                                                                                                                                                                                                                                                                 |                                                                                                                                                                                                      |                                                                                                                                                                                                                                                                                                                                                                                                                                                                                             |           |          |          |           |           |            |            |  |
| Own bicycle .....3                                                                                                                                                                                                                                                                                                                                                                                       | 3                                                                                                                                                                                                                                                                                                                                                                                                                                                                                                                                                                                                                                                                                                                                                                                                                                                                                                                                                                                                                                                                                                                                                                                                                                                                                                                                                                                                                                                                                                                                                                                                                                                                                                                                                                                                                                                                                                                                                                                                                                                                                                                                                                                                                                                                                                                                                                                                                                                                                                                                                                                                                                                                                                                                                                                                                                                                                                                                                                                                                                                                                                                                                                                                                                                                                                                                                                                                                                                                                                                                                                                                                                                                                                                                                                                                                                                                                                                                                                                                                                                                                              |           |          |                                                                                          |           |                             |            |                                                  |   |                                                |   |                                                  |   |                                     |   |                                           |   |                                              |   |                                          |   |                                        |   |                         |    |                                        |  |                |   |                                   |   |                     |   |                     |   |                      |   |                                 |   |                                                                                                                       |  |                |   |             |   |                    |   |                                      |   |                               |   |                                |   |                        |   |                            |   |                                                                                                      |  |           |          |          |           |           |            |            |  |                                                                                                                                                                                                                                                                                                |                                                                                                                                                                                                                                                                                                                 |                                                                                                                                                                                                      |                                                                                                                                                                                                                                                                                                                                                                                                                                                                                             |           |          |          |           |           |            |            |  |
| Own motorcycle / Three-wheeler.....4                                                                                                                                                                                                                                                                                                                                                                     | 4                                                                                                                                                                                                                                                                                                                                                                                                                                                                                                                                                                                                                                                                                                                                                                                                                                                                                                                                                                                                                                                                                                                                                                                                                                                                                                                                                                                                                                                                                                                                                                                                                                                                                                                                                                                                                                                                                                                                                                                                                                                                                                                                                                                                                                                                                                                                                                                                                                                                                                                                                                                                                                                                                                                                                                                                                                                                                                                                                                                                                                                                                                                                                                                                                                                                                                                                                                                                                                                                                                                                                                                                                                                                                                                                                                                                                                                                                                                                                                                                                                                                                              |           |          |                                                                                          |           |                             |            |                                                  |   |                                                |   |                                                  |   |                                     |   |                                           |   |                                              |   |                                          |   |                                        |   |                         |    |                                        |  |                |   |                                   |   |                     |   |                     |   |                      |   |                                 |   |                                                                                                                       |  |                |   |             |   |                    |   |                                      |   |                               |   |                                |   |                        |   |                            |   |                                                                                                      |  |           |          |          |           |           |            |            |  |                                                                                                                                                                                                                                                                                                |                                                                                                                                                                                                                                                                                                                 |                                                                                                                                                                                                      |                                                                                                                                                                                                                                                                                                                                                                                                                                                                                             |           |          |          |           |           |            |            |  |
| Own car / four-wheeler .....5                                                                                                                                                                                                                                                                                                                                                                            | 5                                                                                                                                                                                                                                                                                                                                                                                                                                                                                                                                                                                                                                                                                                                                                                                                                                                                                                                                                                                                                                                                                                                                                                                                                                                                                                                                                                                                                                                                                                                                                                                                                                                                                                                                                                                                                                                                                                                                                                                                                                                                                                                                                                                                                                                                                                                                                                                                                                                                                                                                                                                                                                                                                                                                                                                                                                                                                                                                                                                                                                                                                                                                                                                                                                                                                                                                                                                                                                                                                                                                                                                                                                                                                                                                                                                                                                                                                                                                                                                                                                                                                              |           |          |                                                                                          |           |                             |            |                                                  |   |                                                |   |                                                  |   |                                     |   |                                           |   |                                              |   |                                          |   |                                        |   |                         |    |                                        |  |                |   |                                   |   |                     |   |                     |   |                      |   |                                 |   |                                                                                                                       |  |                |   |             |   |                    |   |                                      |   |                               |   |                                |   |                        |   |                            |   |                                                                                                      |  |           |          |          |           |           |            |            |  |                                                                                                                                                                                                                                                                                                |                                                                                                                                                                                                                                                                                                                 |                                                                                                                                                                                                      |                                                                                                                                                                                                                                                                                                                                                                                                                                                                                             |           |          |          |           |           |            |            |  |
| Taxi or other hired ride.....6                                                                                                                                                                                                                                                                                                                                                                           | 6                                                                                                                                                                                                                                                                                                                                                                                                                                                                                                                                                                                                                                                                                                                                                                                                                                                                                                                                                                                                                                                                                                                                                                                                                                                                                                                                                                                                                                                                                                                                                                                                                                                                                                                                                                                                                                                                                                                                                                                                                                                                                                                                                                                                                                                                                                                                                                                                                                                                                                                                                                                                                                                                                                                                                                                                                                                                                                                                                                                                                                                                                                                                                                                                                                                                                                                                                                                                                                                                                                                                                                                                                                                                                                                                                                                                                                                                                                                                                                                                                                                                                              |           |          |                                                                                          |           |                             |            |                                                  |   |                                                |   |                                                  |   |                                     |   |                                           |   |                                              |   |                                          |   |                                        |   |                         |    |                                        |  |                |   |                                   |   |                     |   |                     |   |                      |   |                                 |   |                                                                                                                       |  |                |   |             |   |                    |   |                                      |   |                               |   |                                |   |                        |   |                            |   |                                                                                                      |  |           |          |          |           |           |            |            |  |                                                                                                                                                                                                                                                                                                |                                                                                                                                                                                                                                                                                                                 |                                                                                                                                                                                                      |                                                                                                                                                                                                                                                                                                                                                                                                                                                                                             |           |          |          |           |           |            |            |  |
| Public transport.....7                                                                                                                                                                                                                                                                                                                                                                                   | 7                                                                                                                                                                                                                                                                                                                                                                                                                                                                                                                                                                                                                                                                                                                                                                                                                                                                                                                                                                                                                                                                                                                                                                                                                                                                                                                                                                                                                                                                                                                                                                                                                                                                                                                                                                                                                                                                                                                                                                                                                                                                                                                                                                                                                                                                                                                                                                                                                                                                                                                                                                                                                                                                                                                                                                                                                                                                                                                                                                                                                                                                                                                                                                                                                                                                                                                                                                                                                                                                                                                                                                                                                                                                                                                                                                                                                                                                                                                                                                                                                                                                                              |           |          |                                                                                          |           |                             |            |                                                  |   |                                                |   |                                                  |   |                                     |   |                                           |   |                                              |   |                                          |   |                                        |   |                         |    |                                        |  |                |   |                                   |   |                     |   |                     |   |                      |   |                                 |   |                                                                                                                       |  |                |   |             |   |                    |   |                                      |   |                               |   |                                |   |                        |   |                            |   |                                                                                                      |  |           |          |          |           |           |            |            |  |                                                                                                                                                                                                                                                                                                |                                                                                                                                                                                                                                                                                                                 |                                                                                                                                                                                                      |                                                                                                                                                                                                                                                                                                                                                                                                                                                                                             |           |          |          |           |           |            |            |  |
| Other (specify) ___ .....8                                                                                                                                                                                                                                                                                                                                                                               | 8                                                                                                                                                                                                                                                                                                                                                                                                                                                                                                                                                                                                                                                                                                                                                                                                                                                                                                                                                                                                                                                                                                                                                                                                                                                                                                                                                                                                                                                                                                                                                                                                                                                                                                                                                                                                                                                                                                                                                                                                                                                                                                                                                                                                                                                                                                                                                                                                                                                                                                                                                                                                                                                                                                                                                                                                                                                                                                                                                                                                                                                                                                                                                                                                                                                                                                                                                                                                                                                                                                                                                                                                                                                                                                                                                                                                                                                                                                                                                                                                                                                                                              |           |          |                                                                                          |           |                             |            |                                                  |   |                                                |   |                                                  |   |                                     |   |                                           |   |                                              |   |                                          |   |                                        |   |                         |    |                                        |  |                |   |                                   |   |                     |   |                     |   |                      |   |                                 |   |                                                                                                                       |  |                |   |             |   |                    |   |                                      |   |                               |   |                                |   |                        |   |                            |   |                                                                                                      |  |           |          |          |           |           |            |            |  |                                                                                                                                                                                                                                                                                                |                                                                                                                                                                                                                                                                                                                 |                                                                                                                                                                                                      |                                                                                                                                                                                                                                                                                                                                                                                                                                                                                             |           |          |          |           |           |            |            |  |
| d) How long did this stage last? <i>[let respondent choose category; if &lt;1 day, code “1” day]</i>                                                                                                                                                                                                                                                                                                     |                                                                                                                                                                                                                                                                                                                                                                                                                                                                                                                                                                                                                                                                                                                                                                                                                                                                                                                                                                                                                                                                                                                                                                                                                                                                                                                                                                                                                                                                                                                                                                                                                                                                                                                                                                                                                                                                                                                                                                                                                                                                                                                                                                                                                                                                                                                                                                                                                                                                                                                                                                                                                                                                                                                                                                                                                                                                                                                                                                                                                                                                                                                                                                                                                                                                                                                                                                                                                                                                                                                                                                                                                                                                                                                                                                                                                                                                                                                                                                                                                                                                                                |           |          |                                                                                          |           |                             |            |                                                  |   |                                                |   |                                                  |   |                                     |   |                                           |   |                                              |   |                                          |   |                                        |   |                         |    |                                        |  |                |   |                                   |   |                     |   |                     |   |                      |   |                                 |   |                                                                                                                       |  |                |   |             |   |                    |   |                                      |   |                               |   |                                |   |                        |   |                            |   |                                                                                                      |  |           |          |          |           |           |            |            |  |                                                                                                                                                                                                                                                                                                |                                                                                                                                                                                                                                                                                                                 |                                                                                                                                                                                                      |                                                                                                                                                                                                                                                                                                                                                                                                                                                                                             |           |          |          |           |           |            |            |  |
| Duration:                                                                                                                                                                                                                                                                                                                                                                                                | ___ days                                                                                                                                                                                                                                                                                                                                                                                                                                                                                                                                                                                                                                                                                                                                                                                                                                                                                                                                                                                                                                                                                                                                                                                                                                                                                                                                                                                                                                                                                                                                                                                                                                                                                                                                                                                                                                                                                                                                                                                                                                                                                                                                                                                                                                                                                                                                                                                                                                                                                                                                                                                                                                                                                                                                                                                                                                                                                                                                                                                                                                                                                                                                                                                                                                                                                                                                                                                                                                                                                                                                                                                                                                                                                                                                                                                                                                                                                                                                                                                                                                                                                       |           |          |                                                                                          |           |                             |            |                                                  |   |                                                |   |                                                  |   |                                     |   |                                           |   |                                              |   |                                          |   |                                        |   |                         |    |                                        |  |                |   |                                   |   |                     |   |                     |   |                      |   |                                 |   |                                                                                                                       |  |                |   |             |   |                    |   |                                      |   |                               |   |                                |   |                        |   |                            |   |                                                                                                      |  |           |          |          |           |           |            |            |  |                                                                                                                                                                                                                                                                                                |                                                                                                                                                                                                                                                                                                                 |                                                                                                                                                                                                      |                                                                                                                                                                                                                                                                                                                                                                                                                                                                                             |           |          |          |           |           |            |            |  |
| ___ days                                                                                                                                                                                                                                                                                                                                                                                                 | ___ weeks                                                                                                                                                                                                                                                                                                                                                                                                                                                                                                                                                                                                                                                                                                                                                                                                                                                                                                                                                                                                                                                                                                                                                                                                                                                                                                                                                                                                                                                                                                                                                                                                                                                                                                                                                                                                                                                                                                                                                                                                                                                                                                                                                                                                                                                                                                                                                                                                                                                                                                                                                                                                                                                                                                                                                                                                                                                                                                                                                                                                                                                                                                                                                                                                                                                                                                                                                                                                                                                                                                                                                                                                                                                                                                                                                                                                                                                                                                                                                                                                                                                                                      |           |          |                                                                                          |           |                             |            |                                                  |   |                                                |   |                                                  |   |                                     |   |                                           |   |                                              |   |                                          |   |                                        |   |                         |    |                                        |  |                |   |                                   |   |                     |   |                     |   |                      |   |                                 |   |                                                                                                                       |  |                |   |             |   |                    |   |                                      |   |                               |   |                                |   |                        |   |                            |   |                                                                                                      |  |           |          |          |           |           |            |            |  |                                                                                                                                                                                                                                                                                                |                                                                                                                                                                                                                                                                                                                 |                                                                                                                                                                                                      |                                                                                                                                                                                                                                                                                                                                                                                                                                                                                             |           |          |          |           |           |            |            |  |
| ___ weeks                                                                                                                                                                                                                                                                                                                                                                                                | ___ months                                                                                                                                                                                                                                                                                                                                                                                                                                                                                                                                                                                                                                                                                                                                                                                                                                                                                                                                                                                                                                                                                                                                                                                                                                                                                                                                                                                                                                                                                                                                                                                                                                                                                                                                                                                                                                                                                                                                                                                                                                                                                                                                                                                                                                                                                                                                                                                                                                                                                                                                                                                                                                                                                                                                                                                                                                                                                                                                                                                                                                                                                                                                                                                                                                                                                                                                                                                                                                                                                                                                                                                                                                                                                                                                                                                                                                                                                                                                                                                                                                                                                     |           |          |                                                                                          |           |                             |            |                                                  |   |                                                |   |                                                  |   |                                     |   |                                           |   |                                              |   |                                          |   |                                        |   |                         |    |                                        |  |                |   |                                   |   |                     |   |                     |   |                      |   |                                 |   |                                                                                                                       |  |                |   |             |   |                    |   |                                      |   |                               |   |                                |   |                        |   |                            |   |                                                                                                      |  |           |          |          |           |           |            |            |  |                                                                                                                                                                                                                                                                                                |                                                                                                                                                                                                                                                                                                                 |                                                                                                                                                                                                      |                                                                                                                                                                                                                                                                                                                                                                                                                                                                                             |           |          |          |           |           |            |            |  |
| ___ months                                                                                                                                                                                                                                                                                                                                                                                               |                                                                                                                                                                                                                                                                                                                                                                                                                                                                                                                                                                                                                                                                                                                                                                                                                                                                                                                                                                                                                                                                                                                                                                                                                                                                                                                                                                                                                                                                                                                                                                                                                                                                                                                                                                                                                                                                                                                                                                                                                                                                                                                                                                                                                                                                                                                                                                                                                                                                                                                                                                                                                                                                                                                                                                                                                                                                                                                                                                                                                                                                                                                                                                                                                                                                                                                                                                                                                                                                                                                                                                                                                                                                                                                                                                                                                                                                                                                                                                                                                                                                                                |           |          |                                                                                          |           |                             |            |                                                  |   |                                                |   |                                                  |   |                                     |   |                                           |   |                                              |   |                                          |   |                                        |   |                         |    |                                        |  |                |   |                                   |   |                     |   |                     |   |                      |   |                                 |   |                                                                                                                       |  |                |   |             |   |                    |   |                                      |   |                               |   |                                |   |                        |   |                            |   |                                                                                                      |  |           |          |          |           |           |            |            |  |                                                                                                                                                                                                                                                                                                |                                                                                                                                                                                                                                                                                                                 |                                                                                                                                                                                                      |                                                                                                                                                                                                                                                                                                                                                                                                                                                                                             |           |          |          |           |           |            |            |  |
| <p>e) Can you please name or describe all the medicines that you received or were prescribed during this step?</p> <p><i>[include medicine stored at home if “self-care at home”] [continue for all medicines received, then complete Questions g to k for each medicine individually]</i></p>                                                                                                           | <div style="display: flex; align-items: center;">  <div> <p>Medicine 1:<br/>Name/description: _____</p> <p>Medicine n:<br/>Name/description: _____</p> </div> </div>                                                                                                                                                                                                                                                                                                                                                                                                                                                                                                                                                                                                                                                                                                                                                                                                                                                                                                                                                                                                                                                                                                                                                                                                                                                                                                                                                                                                                                                                                                                                                                                                                                                                                                                                                                                                                                                                                                                                                                                                                                                                                                                                                                                                                                                                                                                                                                                                                                                                                                                                                                                                                                                                                                                                                                                                                                                                                                                                                                                                                                                                                                                                                                                                                                                                                                                                                                                                                                                                                                                                                                                                                                                                                                                                                                                |           |          |                                                                                          |           |                             |            |                                                  |   |                                                |   |                                                  |   |                                     |   |                                           |   |                                              |   |                                          |   |                                        |   |                         |    |                                        |  |                |   |                                   |   |                     |   |                     |   |                      |   |                                 |   |                                                                                                                       |  |                |   |             |   |                    |   |                                      |   |                               |   |                                |   |                        |   |                            |   |                                                                                                      |  |           |          |          |           |           |            |            |  |                                                                                                                                                                                                                                                                                                |                                                                                                                                                                                                                                                                                                                 |                                                                                                                                                                                                      |                                                                                                                                                                                                                                                                                                                                                                                                                                                                                             |           |          |          |           |           |            |            |  |
| <p>f) For how long did [you / the child] take the medicine? <i>[let respondent choose category; if more than one repeated episode, indicate total duration] [for each medicine individually]</i></p>                                                                                                                                                                                                     | <table border="1" style="width: 100%; border-collapse: collapse;"> <tbody> <tr> <td style="text-align: center;">Duration:</td> <td style="text-align: center;">___ days</td> </tr> <tr> <td style="text-align: center;">___ days</td> <td style="text-align: center;">___ weeks</td> </tr> <tr> <td style="text-align: center;">___ weeks</td> <td style="text-align: center;">___ months</td> </tr> <tr> <td style="text-align: center;">___ months</td> <td></td> </tr> </tbody> </table>                                                                                                                                                                                                                                                                                                                                                                                                                                                                                                                                                                                                                                                                                                                                                                                                                                                                                                                                                                                                                                                                                                                                                                                                                                                                                                                                                                                                                                                                                                                                                                                                                                                                                                                                                                                                                                                                                                                                                                                                                                                                                                                                                                                                                                                                                                                                                                                                                                                                                                                                                                                                                                                                                                                                                                                                                                                                                                                                                                                                                                                                                                                                                                                                                                                                                                                                                                                                                                                                                                                                                                                                    | Duration: | ___ days | ___ days                                                                                 | ___ weeks | ___ weeks                   | ___ months | ___ months                                       |   |                                                |   |                                                  |   |                                     |   |                                           |   |                                              |   |                                          |   |                                        |   |                         |    |                                        |  |                |   |                                   |   |                     |   |                     |   |                      |   |                                 |   |                                                                                                                       |  |                |   |             |   |                    |   |                                      |   |                               |   |                                |   |                        |   |                            |   |                                                                                                      |  |           |          |          |           |           |            |            |  |                                                                                                                                                                                                                                                                                                |                                                                                                                                                                                                                                                                                                                 |                                                                                                                                                                                                      |                                                                                                                                                                                                                                                                                                                                                                                                                                                                                             |           |          |          |           |           |            |            |  |
| Duration:                                                                                                                                                                                                                                                                                                                                                                                                | ___ days                                                                                                                                                                                                                                                                                                                                                                                                                                                                                                                                                                                                                                                                                                                                                                                                                                                                                                                                                                                                                                                                                                                                                                                                                                                                                                                                                                                                                                                                                                                                                                                                                                                                                                                                                                                                                                                                                                                                                                                                                                                                                                                                                                                                                                                                                                                                                                                                                                                                                                                                                                                                                                                                                                                                                                                                                                                                                                                                                                                                                                                                                                                                                                                                                                                                                                                                                                                                                                                                                                                                                                                                                                                                                                                                                                                                                                                                                                                                                                                                                                                                                       |           |          |                                                                                          |           |                             |            |                                                  |   |                                                |   |                                                  |   |                                     |   |                                           |   |                                              |   |                                          |   |                                        |   |                         |    |                                        |  |                |   |                                   |   |                     |   |                     |   |                      |   |                                 |   |                                                                                                                       |  |                |   |             |   |                    |   |                                      |   |                               |   |                                |   |                        |   |                            |   |                                                                                                      |  |           |          |          |           |           |            |            |  |                                                                                                                                                                                                                                                                                                |                                                                                                                                                                                                                                                                                                                 |                                                                                                                                                                                                      |                                                                                                                                                                                                                                                                                                                                                                                                                                                                                             |           |          |          |           |           |            |            |  |
| ___ days                                                                                                                                                                                                                                                                                                                                                                                                 | ___ weeks                                                                                                                                                                                                                                                                                                                                                                                                                                                                                                                                                                                                                                                                                                                                                                                                                                                                                                                                                                                                                                                                                                                                                                                                                                                                                                                                                                                                                                                                                                                                                                                                                                                                                                                                                                                                                                                                                                                                                                                                                                                                                                                                                                                                                                                                                                                                                                                                                                                                                                                                                                                                                                                                                                                                                                                                                                                                                                                                                                                                                                                                                                                                                                                                                                                                                                                                                                                                                                                                                                                                                                                                                                                                                                                                                                                                                                                                                                                                                                                                                                                                                      |           |          |                                                                                          |           |                             |            |                                                  |   |                                                |   |                                                  |   |                                     |   |                                           |   |                                              |   |                                          |   |                                        |   |                         |    |                                        |  |                |   |                                   |   |                     |   |                     |   |                      |   |                                 |   |                                                                                                                       |  |                |   |             |   |                    |   |                                      |   |                               |   |                                |   |                        |   |                            |   |                                                                                                      |  |           |          |          |           |           |            |            |  |                                                                                                                                                                                                                                                                                                |                                                                                                                                                                                                                                                                                                                 |                                                                                                                                                                                                      |                                                                                                                                                                                                                                                                                                                                                                                                                                                                                             |           |          |          |           |           |            |            |  |
| ___ weeks                                                                                                                                                                                                                                                                                                                                                                                                | ___ months                                                                                                                                                                                                                                                                                                                                                                                                                                                                                                                                                                                                                                                                                                                                                                                                                                                                                                                                                                                                                                                                                                                                                                                                                                                                                                                                                                                                                                                                                                                                                                                                                                                                                                                                                                                                                                                                                                                                                                                                                                                                                                                                                                                                                                                                                                                                                                                                                                                                                                                                                                                                                                                                                                                                                                                                                                                                                                                                                                                                                                                                                                                                                                                                                                                                                                                                                                                                                                                                                                                                                                                                                                                                                                                                                                                                                                                                                                                                                                                                                                                                                     |           |          |                                                                                          |           |                             |            |                                                  |   |                                                |   |                                                  |   |                                     |   |                                           |   |                                              |   |                                          |   |                                        |   |                         |    |                                        |  |                |   |                                   |   |                     |   |                     |   |                      |   |                                 |   |                                                                                                                       |  |                |   |             |   |                    |   |                                      |   |                               |   |                                |   |                        |   |                            |   |                                                                                                      |  |           |          |          |           |           |            |            |  |                                                                                                                                                                                                                                                                                                |                                                                                                                                                                                                                                                                                                                 |                                                                                                                                                                                                      |                                                                                                                                                                                                                                                                                                                                                                                                                                                                                             |           |          |          |           |           |            |            |  |
| ___ months                                                                                                                                                                                                                                                                                                                                                                                               |                                                                                                                                                                                                                                                                                                                                                                                                                                                                                                                                                                                                                                                                                                                                                                                                                                                                                                                                                                                                                                                                                                                                                                                                                                                                                                                                                                                                                                                                                                                                                                                                                                                                                                                                                                                                                                                                                                                                                                                                                                                                                                                                                                                                                                                                                                                                                                                                                                                                                                                                                                                                                                                                                                                                                                                                                                                                                                                                                                                                                                                                                                                                                                                                                                                                                                                                                                                                                                                                                                                                                                                                                                                                                                                                                                                                                                                                                                                                                                                                                                                                                                |           |          |                                                                                          |           |                             |            |                                                  |   |                                                |   |                                                  |   |                                     |   |                                           |   |                                              |   |                                          |   |                                        |   |                         |    |                                        |  |                |   |                                   |   |                     |   |                     |   |                      |   |                                 |   |                                                                                                                       |  |                |   |             |   |                    |   |                                      |   |                               |   |                                |   |                        |   |                            |   |                                                                                                      |  |           |          |          |           |           |            |            |  |                                                                                                                                                                                                                                                                                                |                                                                                                                                                                                                                                                                                                                 |                                                                                                                                                                                                      |                                                                                                                                                                                                                                                                                                                                                                                                                                                                                             |           |          |          |           |           |            |            |  |



|                                                                                                                                                                                          |                                    |                                                                                                                                                                                                                                                                                                                                                                                                                    |                                                                                                                                                                                                                                                                                                                                                                                                                    |
|------------------------------------------------------------------------------------------------------------------------------------------------------------------------------------------|------------------------------------|--------------------------------------------------------------------------------------------------------------------------------------------------------------------------------------------------------------------------------------------------------------------------------------------------------------------------------------------------------------------------------------------------------------------|--------------------------------------------------------------------------------------------------------------------------------------------------------------------------------------------------------------------------------------------------------------------------------------------------------------------------------------------------------------------------------------------------------------------|
| g) How often per day did [you / the child] take the medicine?<br><i>[calculate into daily use according to respondent's chosen frequency]</i><br><i>[for each medicine individually]</i> |                                    | Frequency: ___ times daily                                                                                                                                                                                                                                                                                                                                                                                         | ___ times daily                                                                                                                                                                                                                                                                                                                                                                                                    |
| h) What dosage did [you / the child] normally take?<br><i>[let respondent choose category according to type of medicine]</i><br><i>[for each medicine individually]</i>                  |                                    | Dosage<br>___ tablets / capsules<br>___ drops (for liquid medicine)<br>___ spoons (for liquid medicine)<br>___ shots/injections (for intravenous medicine)<br>per time administered                                                                                                                                                                                                                                | ___ tablets<br>___ drops<br>___ spoons<br>___ shots                                                                                                                                                                                                                                                                                                                                                                |
| i) Did [you / the child] take the medicine exactly as it was recommended to you by the person who prescribed/sold them<br><i>[for each medicine individually]</i>                        |                                    | Yes .....1<br>No .....0<br>Did not receive advice .....9<br>Don't know .....99                                                                                                                                                                                                                                                                                                                                     | 1<br>2<br>9<br>99                                                                                                                                                                                                                                                                                                                                                                                                  |
| j) Did [you / the child] finish the medicine?<br><i>[for each medicine individually]</i>                                                                                                 |                                    | Yes .....1<br>No .....0                                                                                                                                                                                                                                                                                                                                                                                            | 1<br>0                                                                                                                                                                                                                                                                                                                                                                                                             |
| k) Did you or anybody else use a mobile phone during this stage in connection with your condition? <i>[if no, go to next step]</i>                                                       |                                    | Yes .....1<br>No .....0 → <i>[next step]</i>                                                                                                                                                                                                                                                                                                                                                                       | 1<br>0                                                                                                                                                                                                                                                                                                                                                                                                             |
| l) What was the purpose of using the mobile phone?<br><i>[Mark all that apply]</i>                                                                                                       |                                    | Ask for advice .....1<br>Call for treatment .....2<br>Arrange transport .....3<br>Appointment .....4<br>Reassure family/friends .....5<br>Ask for money/supplies .....6<br>Provider contacting me for information .....7<br>Treatment reminder .....8<br>Other (specify) _ .....9                                                                                                                                  | 1<br>2<br>3<br>4<br>5<br>6<br>7<br>8<br>9                                                                                                                                                                                                                                                                                                                                                                          |
| m) Which mobile phone functions did you or anybody else use?<br><i>[Mark all that apply]</i>                                                                                             |                                    | Call .....1<br>SMS .....2<br>Internet, messenger .....3<br>Alarm, calendar, reminder, etc. ....4<br>Other (specify) _ .....5                                                                                                                                                                                                                                                                                       | 1<br>2<br>3<br>4<br>5                                                                                                                                                                                                                                                                                                                                                                                              |
| 15.6. [Have you / has the child] now recovered from the illness/accident?                                                                                                                |                                    | Yes .....1<br>No .....0                                                                                                                                                                                                                                                                                                                                                                                            |                                                                                                                                                                                                                                                                                                                                                                                                                    |
| 15.7. Was anybody of your personal relationships involved in providing advice or help during the illness? <i>[record up to ten names]</i>                                                |                                    | Yes .....1<br>No .....0                                                                                                                                                                                                                                                                                                                                                                                            |                                                                                                                                                                                                                                                                                                                                                                                                                    |
| <i>[For district survey]</i><br>15.7.b How are these people related to you? <i>[Mark all that apply]</i>                                                                                 |                                    | Spouse .....1<br>Parent .....2<br>Child .....3<br>Sibling .....4<br>Other relative .....5<br>Neighbour .....6<br>Friend (if not neighbour) .....7<br>Other villager .....8<br>Other (specify) _ .....9                                                                                                                                                                                                             |                                                                                                                                                                                                                                                                                                                                                                                                                    |
| 15.7.c What kind of support did they provide? <i>[Mark all that apply]</i>                                                                                                               |                                    | Providing healthcare/attending .....11<br>Providing advice .....12<br>Providing medicine .....13<br>Lending/granting money .....21<br>Transportation/Lending vehicle .....22<br>Contacting family/friends .....23<br>Providing food .....31<br>Helping with children/housework .....32<br>Helping with jobs/agriculture work (feeding animals/tending crops/covering shifts, etc.) 33<br>Other (specify) _ .....99 |                                                                                                                                                                                                                                                                                                                                                                                                                    |
| <i>[For network survey]</i>                                                                                                                                                              | a) What is the name of the person? | b) How is this person related to you?                                                                                                                                                                                                                                                                                                                                                                              | c) What kind of support was provided?<br><i>[mark all that apply]</i>                                                                                                                                                                                                                                                                                                                                              |
| 15.7.1.<br>Contact 1                                                                                                                                                                     | Name:<br>_____                     | Spouse .....1<br>Parent .....2<br>Child .....3<br>Sibling .....4<br>Other relative .....5<br>Neighbour .....6<br>Friend (if not neighbour) .....7<br>Other villager .....8<br>Other (specify) _ .....9                                                                                                                                                                                                             | Providing healthcare/attending .....11<br>Providing advice .....12<br>Providing medicine .....13<br>Lending/granting money .....21<br>Transportation/Lending vehicle .....22<br>Contacting family/friends .....23<br>Providing food .....31<br>Helping with children/housework .....32<br>Helping with jobs/agriculture work (feeding animals/tending crops/covering shifts, etc.) 33<br>Other (specify) _ .....99 |
| 15.7.2.<br>Contact n                                                                                                                                                                     | Name                               | 1 2 3 4 5 6 7 8 9                                                                                                                                                                                                                                                                                                                                                                                                  | 11 12 13 21 22 23 31 32 33 99                                                                                                                                                                                                                                                                                                                                                                                      |

|                                                                                                                                                                                                                                          |                                                                                                                                                                                                                                                                                                                                                                                                                                                                                                                                                                                                                                                                                                                                                                                                                                                                                                                                                                                                                                                                              |                                    |    |                                                            |    |                                                                                   |    |                                                                                 |    |                                                                                 |    |                         |    |                             |    |                                           |    |                                      |    |                                         |    |                  |    |                          |    |                        |    |                              |    |                                |    |                        |    |
|------------------------------------------------------------------------------------------------------------------------------------------------------------------------------------------------------------------------------------------|------------------------------------------------------------------------------------------------------------------------------------------------------------------------------------------------------------------------------------------------------------------------------------------------------------------------------------------------------------------------------------------------------------------------------------------------------------------------------------------------------------------------------------------------------------------------------------------------------------------------------------------------------------------------------------------------------------------------------------------------------------------------------------------------------------------------------------------------------------------------------------------------------------------------------------------------------------------------------------------------------------------------------------------------------------------------------|------------------------------------|----|------------------------------------------------------------|----|-----------------------------------------------------------------------------------|----|---------------------------------------------------------------------------------|----|---------------------------------------------------------------------------------|----|-------------------------|----|-----------------------------|----|-------------------------------------------|----|--------------------------------------|----|-----------------------------------------|----|------------------|----|--------------------------|----|------------------------|----|------------------------------|----|--------------------------------|----|------------------------|----|
| <p><b>15.8.</b> Did <u>you</u> have another acute illness (not a chronic, long-term condition that comes again and again) or an accident <u>in the last two months</u>?<br/> <i>[if yes, complete another sheet for Question 15]</i></p> | <p>Yes ..... 1 → [Q 15]<br/>                 No ..... 0 ↓</p>                                                                                                                                                                                                                                                                                                                                                                                                                                                                                                                                                                                                                                                                                                                                                                                                                                                                                                                                                                                                                |                                    |    |                                                            |    |                                                                                   |    |                                                                                 |    |                                                                                 |    |                         |    |                             |    |                                           |    |                                      |    |                                         |    |                  |    |                          |    |                        |    |                              |    |                                |    |                        |    |
| <p><b>16.</b> I would now like to ask you your opinion about medicine. There are no right or wrong answers, I only want to understand what you think. Consider the following medicines:</p>                                              |                                                                                                                                                                                                                                                                                                                                                                                                                                                                                                                                                                                                                                                                                                                                                                                                                                                                                                                                                                                           |                                    |    |                                                            |    |                                                                                   |    |                                                                                 |    |                                                                                 |    |                         |    |                             |    |                                           |    |                                      |    |                                         |    |                  |    |                          |    |                        |    |                              |    |                                |    |                        |    |
| <p><b>16.1.</b> Have you seen these medicines before?</p>                                                                                                                                                                                | <p>Yes ..... 1<br/>                 No ..... 0 → [Q 16.4]</p>                                                                                                                                                                                                                                                                                                                                                                                                                                                                                                                                                                                                                                                                                                                                                                                                                                                                                                                                                                                                                |                                    |    |                                                            |    |                                                                                   |    |                                                                                 |    |                                                                                 |    |                         |    |                             |    |                                           |    |                                      |    |                                         |    |                  |    |                          |    |                        |    |                              |    |                                |    |                        |    |
| <p><b>16.2.</b> What do you call this medicine?</p>                                                                                                                                                                                      | <table border="0"> <tr> <td>Antibiotics ຫານເຮັດຍານີ້ວ່າອະໄວ</td> <td>11</td> </tr> <tr> <td>Anti-inflammatory ຍານແກ້ອັກເສນ</td> <td>12</td> </tr> <tr> <td>Germ killer ຍາຜ່າເຂື່ອ</td> <td>13</td> </tr> <tr> <td>Amoxy / Amoxicillin ອະມິອັກຊີ/ອະມິອັກຊີຊີລິນ</td> <td>14</td> </tr> <tr> <td>Sore throat medicine ຍານແກ້ເຈັບຄອ</td> <td>15</td> </tr> <tr> <td>Cough medicine ຍານແກ້ໄວ</td> <td>16</td> </tr> <tr> <td>Pain reliever ຍານແກ້ປວດ</td> <td>17</td> </tr> <tr> <td>Fever reliever ຍານແກ້ໄຂ້</td> <td>18</td> </tr> <tr> <td>Other (specify: _____) ອື່ນໆ (ໄປຮຽນ)</td> <td>98</td> </tr> <tr> <td>Germ preventer / antibiotic ຍາຕ້ານເຊື້ອ</td> <td>21</td> </tr> <tr> <td>Amok ຍາຕ້ານເຊື້ອ</td> <td>22</td> </tr> <tr> <td>Ampi ຍາແອມປີ</td> <td>23</td> </tr> <tr> <td>Tetra ຍາຕາຕາ</td> <td>24</td> </tr> <tr> <td>Gulolam ກູໂລລາມ</td> <td>25</td> </tr> <tr> <td>Sepasin ເຊພາສິນ</td> <td>26</td> </tr> <tr> <td>Other (specify: _____)</td> <td>99</td> </tr> </table>  | Antibiotics ຫານເຮັດຍານີ້ວ່າອະໄວ    | 11 | Anti-inflammatory ຍານແກ້ອັກເສນ                             | 12 | Germ killer ຍາຜ່າເຂື່ອ                                                            | 13 | Amoxy / Amoxicillin ອະມິອັກຊີ/ອະມິອັກຊີຊີລິນ                                    | 14 | Sore throat medicine ຍານແກ້ເຈັບຄອ                                               | 15 | Cough medicine ຍານແກ້ໄວ | 16 | Pain reliever ຍານແກ້ປວດ     | 17 | Fever reliever ຍານແກ້ໄຂ້                  | 18 | Other (specify: _____) ອື່ນໆ (ໄປຮຽນ) | 98 | Germ preventer / antibiotic ຍາຕ້ານເຊື້ອ | 21 | Amok ຍາຕ້ານເຊື້ອ | 22 | Ampi ຍາແອມປີ             | 23 | Tetra ຍາຕາຕາ           | 24 | Gulolam ກູໂລລາມ              | 25 | Sepasin ເຊພາສິນ                | 26 | Other (specify: _____) | 99 |
| Antibiotics ຫານເຮັດຍານີ້ວ່າອະໄວ                                                                                                                                                                                                          | 11                                                                                                                                                                                                                                                                                                                                                                                                                                                                                                                                                                                                                                                                                                                                                                                                                                                                                                                                                                                                                                                                           |                                    |    |                                                            |    |                                                                                   |    |                                                                                 |    |                                                                                 |    |                         |    |                             |    |                                           |    |                                      |    |                                         |    |                  |    |                          |    |                        |    |                              |    |                                |    |                        |    |
| Anti-inflammatory ຍານແກ້ອັກເສນ                                                                                                                                                                                                           | 12                                                                                                                                                                                                                                                                                                                                                                                                                                                                                                                                                                                                                                                                                                                                                                                                                                                                                                                                                                                                                                                                           |                                    |    |                                                            |    |                                                                                   |    |                                                                                 |    |                                                                                 |    |                         |    |                             |    |                                           |    |                                      |    |                                         |    |                  |    |                          |    |                        |    |                              |    |                                |    |                        |    |
| Germ killer ຍາຜ່າເຂື່ອ                                                                                                                                                                                                                   | 13                                                                                                                                                                                                                                                                                                                                                                                                                                                                                                                                                                                                                                                                                                                                                                                                                                                                                                                                                                                                                                                                           |                                    |    |                                                            |    |                                                                                   |    |                                                                                 |    |                                                                                 |    |                         |    |                             |    |                                           |    |                                      |    |                                         |    |                  |    |                          |    |                        |    |                              |    |                                |    |                        |    |
| Amoxy / Amoxicillin ອະມິອັກຊີ/ອະມິອັກຊີຊີລິນ                                                                                                                                                                                             | 14                                                                                                                                                                                                                                                                                                                                                                                                                                                                                                                                                                                                                                                                                                                                                                                                                                                                                                                                                                                                                                                                           |                                    |    |                                                            |    |                                                                                   |    |                                                                                 |    |                                                                                 |    |                         |    |                             |    |                                           |    |                                      |    |                                         |    |                  |    |                          |    |                        |    |                              |    |                                |    |                        |    |
| Sore throat medicine ຍານແກ້ເຈັບຄອ                                                                                                                                                                                                        | 15                                                                                                                                                                                                                                                                                                                                                                                                                                                                                                                                                                                                                                                                                                                                                                                                                                                                                                                                                                                                                                                                           |                                    |    |                                                            |    |                                                                                   |    |                                                                                 |    |                                                                                 |    |                         |    |                             |    |                                           |    |                                      |    |                                         |    |                  |    |                          |    |                        |    |                              |    |                                |    |                        |    |
| Cough medicine ຍານແກ້ໄວ                                                                                                                                                                                                                  | 16                                                                                                                                                                                                                                                                                                                                                                                                                                                                                                                                                                                                                                                                                                                                                                                                                                                                                                                                                                                                                                                                           |                                    |    |                                                            |    |                                                                                   |    |                                                                                 |    |                                                                                 |    |                         |    |                             |    |                                           |    |                                      |    |                                         |    |                  |    |                          |    |                        |    |                              |    |                                |    |                        |    |
| Pain reliever ຍານແກ້ປວດ                                                                                                                                                                                                                  | 17                                                                                                                                                                                                                                                                                                                                                                                                                                                                                                                                                                                                                                                                                                                                                                                                                                                                                                                                                                                                                                                                           |                                    |    |                                                            |    |                                                                                   |    |                                                                                 |    |                                                                                 |    |                         |    |                             |    |                                           |    |                                      |    |                                         |    |                  |    |                          |    |                        |    |                              |    |                                |    |                        |    |
| Fever reliever ຍານແກ້ໄຂ້                                                                                                                                                                                                                 | 18                                                                                                                                                                                                                                                                                                                                                                                                                                                                                                                                                                                                                                                                                                                                                                                                                                                                                                                                                                                                                                                                           |                                    |    |                                                            |    |                                                                                   |    |                                                                                 |    |                                                                                 |    |                         |    |                             |    |                                           |    |                                      |    |                                         |    |                  |    |                          |    |                        |    |                              |    |                                |    |                        |    |
| Other (specify: _____) ອື່ນໆ (ໄປຮຽນ)                                                                                                                                                                                                     | 98                                                                                                                                                                                                                                                                                                                                                                                                                                                                                                                                                                                                                                                                                                                                                                                                                                                                                                                                                                                                                                                                           |                                    |    |                                                            |    |                                                                                   |    |                                                                                 |    |                                                                                 |    |                         |    |                             |    |                                           |    |                                      |    |                                         |    |                  |    |                          |    |                        |    |                              |    |                                |    |                        |    |
| Germ preventer / antibiotic ຍາຕ້ານເຊື້ອ                                                                                                                                                                                                  | 21                                                                                                                                                                                                                                                                                                                                                                                                                                                                                                                                                                                                                                                                                                                                                                                                                                                                                                                                                                                                                                                                           |                                    |    |                                                            |    |                                                                                   |    |                                                                                 |    |                                                                                 |    |                         |    |                             |    |                                           |    |                                      |    |                                         |    |                  |    |                          |    |                        |    |                              |    |                                |    |                        |    |
| Amok ຍາຕ້ານເຊື້ອ                                                                                                                                                                                                                         | 22                                                                                                                                                                                                                                                                                                                                                                                                                                                                                                                                                                                                                                                                                                                                                                                                                                                                                                                                                                                                                                                                           |                                    |    |                                                            |    |                                                                                   |    |                                                                                 |    |                                                                                 |    |                         |    |                             |    |                                           |    |                                      |    |                                         |    |                  |    |                          |    |                        |    |                              |    |                                |    |                        |    |
| Ampi ຍາແອມປີ                                                                                                                                                                                                                             | 23                                                                                                                                                                                                                                                                                                                                                                                                                                                                                                                                                                                                                                                                                                                                                                                                                                                                                                                                                                                                                                                                           |                                    |    |                                                            |    |                                                                                   |    |                                                                                 |    |                                                                                 |    |                         |    |                             |    |                                           |    |                                      |    |                                         |    |                  |    |                          |    |                        |    |                              |    |                                |    |                        |    |
| Tetra ຍາຕາຕາ                                                                                                                                                                                                                             | 24                                                                                                                                                                                                                                                                                                                                                                                                                                                                                                                                                                                                                                                                                                                                                                                                                                                                                                                                                                                                                                                                           |                                    |    |                                                            |    |                                                                                   |    |                                                                                 |    |                                                                                 |    |                         |    |                             |    |                                           |    |                                      |    |                                         |    |                  |    |                          |    |                        |    |                              |    |                                |    |                        |    |
| Gulolam ກູໂລລາມ                                                                                                                                                                                                                          | 25                                                                                                                                                                                                                                                                                                                                                                                                                                                                                                                                                                                                                                                                                                                                                                                                                                                                                                                                                                                                                                                                           |                                    |    |                                                            |    |                                                                                   |    |                                                                                 |    |                                                                                 |    |                         |    |                             |    |                                           |    |                                      |    |                                         |    |                  |    |                          |    |                        |    |                              |    |                                |    |                        |    |
| Sepasin ເຊພາສິນ                                                                                                                                                                                                                          | 26                                                                                                                                                                                                                                                                                                                                                                                                                                                                                                                                                                                                                                                                                                                                                                                                                                                                                                                                                                                                                                                                           |                                    |    |                                                            |    |                                                                                   |    |                                                                                 |    |                                                                                 |    |                         |    |                             |    |                                           |    |                                      |    |                                         |    |                  |    |                          |    |                        |    |                              |    |                                |    |                        |    |
| Other (specify: _____)                                                                                                                                                                                                                   | 99                                                                                                                                                                                                                                                                                                                                                                                                                                                                                                                                                                                                                                                                                                                                                                                                                                                                                                                                                                                                                                                                           |                                    |    |                                                            |    |                                                                                   |    |                                                                                 |    |                                                                                 |    |                         |    |                             |    |                                           |    |                                      |    |                                         |    |                  |    |                          |    |                        |    |                              |    |                                |    |                        |    |
| <p><b>16.3.</b> What symptoms or illnesses would you use this medicine for?</p>                                                                                                                                                          | <table border="0"> <tr><td>Fever</td><td>1</td></tr> <tr><td>Cough</td><td>2</td></tr> <tr><td>Sore throat</td><td>3</td></tr> <tr><td>Inflammation</td><td>4</td></tr> <tr><td>Cold, flu, runny nose</td><td>5</td></tr> <tr><td>Diarrhoea</td><td>6</td></tr> <tr><td>Headache</td><td>7</td></tr> <tr><td>Stomach ache</td><td>8</td></tr> <tr><td>Muscle pain, other aches</td><td>9</td></tr> <tr><td>Skin diseases, rashes, lumps</td><td>10</td></tr> <tr><td>Wounds</td><td>11</td></tr> <tr><td>Urinary tract infections</td><td>12</td></tr> <tr><td>Every kind of sickness</td><td>13</td></tr> <tr><td>Whatever the doctor suggests</td><td>14</td></tr> <tr><td>Don't know / prefer not to say</td><td>98</td></tr> <tr><td>Other (specify: _____)</td><td>99</td></tr> </table>                                                                                                                                                                                                                                                                                | Fever                              | 1  | Cough                                                      | 2  | Sore throat                                                                       | 3  | Inflammation                                                                    | 4  | Cold, flu, runny nose                                                           | 5  | Diarrhoea               | 6  | Headache                    | 7  | Stomach ache                              | 8  | Muscle pain, other aches             | 9  | Skin diseases, rashes, lumps            | 10 | Wounds           | 11 | Urinary tract infections | 12 | Every kind of sickness | 13 | Whatever the doctor suggests | 14 | Don't know / prefer not to say | 98 | Other (specify: _____) | 99 |
| Fever                                                                                                                                                                                                                                    | 1                                                                                                                                                                                                                                                                                                                                                                                                                                                                                                                                                                                                                                                                                                                                                                                                                                                                                                                                                                                                                                                                            |                                    |    |                                                            |    |                                                                                   |    |                                                                                 |    |                                                                                 |    |                         |    |                             |    |                                           |    |                                      |    |                                         |    |                  |    |                          |    |                        |    |                              |    |                                |    |                        |    |
| Cough                                                                                                                                                                                                                                    | 2                                                                                                                                                                                                                                                                                                                                                                                                                                                                                                                                                                                                                                                                                                                                                                                                                                                                                                                                                                                                                                                                            |                                    |    |                                                            |    |                                                                                   |    |                                                                                 |    |                                                                                 |    |                         |    |                             |    |                                           |    |                                      |    |                                         |    |                  |    |                          |    |                        |    |                              |    |                                |    |                        |    |
| Sore throat                                                                                                                                                                                                                              | 3                                                                                                                                                                                                                                                                                                                                                                                                                                                                                                                                                                                                                                                                                                                                                                                                                                                                                                                                                                                                                                                                            |                                    |    |                                                            |    |                                                                                   |    |                                                                                 |    |                                                                                 |    |                         |    |                             |    |                                           |    |                                      |    |                                         |    |                  |    |                          |    |                        |    |                              |    |                                |    |                        |    |
| Inflammation                                                                                                                                                                                                                             | 4                                                                                                                                                                                                                                                                                                                                                                                                                                                                                                                                                                                                                                                                                                                                                                                                                                                                                                                                                                                                                                                                            |                                    |    |                                                            |    |                                                                                   |    |                                                                                 |    |                                                                                 |    |                         |    |                             |    |                                           |    |                                      |    |                                         |    |                  |    |                          |    |                        |    |                              |    |                                |    |                        |    |
| Cold, flu, runny nose                                                                                                                                                                                                                    | 5                                                                                                                                                                                                                                                                                                                                                                                                                                                                                                                                                                                                                                                                                                                                                                                                                                                                                                                                                                                                                                                                            |                                    |    |                                                            |    |                                                                                   |    |                                                                                 |    |                                                                                 |    |                         |    |                             |    |                                           |    |                                      |    |                                         |    |                  |    |                          |    |                        |    |                              |    |                                |    |                        |    |
| Diarrhoea                                                                                                                                                                                                                                | 6                                                                                                                                                                                                                                                                                                                                                                                                                                                                                                                                                                                                                                                                                                                                                                                                                                                                                                                                                                                                                                                                            |                                    |    |                                                            |    |                                                                                   |    |                                                                                 |    |                                                                                 |    |                         |    |                             |    |                                           |    |                                      |    |                                         |    |                  |    |                          |    |                        |    |                              |    |                                |    |                        |    |
| Headache                                                                                                                                                                                                                                 | 7                                                                                                                                                                                                                                                                                                                                                                                                                                                                                                                                                                                                                                                                                                                                                                                                                                                                                                                                                                                                                                                                            |                                    |    |                                                            |    |                                                                                   |    |                                                                                 |    |                                                                                 |    |                         |    |                             |    |                                           |    |                                      |    |                                         |    |                  |    |                          |    |                        |    |                              |    |                                |    |                        |    |
| Stomach ache                                                                                                                                                                                                                             | 8                                                                                                                                                                                                                                                                                                                                                                                                                                                                                                                                                                                                                                                                                                                                                                                                                                                                                                                                                                                                                                                                            |                                    |    |                                                            |    |                                                                                   |    |                                                                                 |    |                                                                                 |    |                         |    |                             |    |                                           |    |                                      |    |                                         |    |                  |    |                          |    |                        |    |                              |    |                                |    |                        |    |
| Muscle pain, other aches                                                                                                                                                                                                                 | 9                                                                                                                                                                                                                                                                                                                                                                                                                                                                                                                                                                                                                                                                                                                                                                                                                                                                                                                                                                                                                                                                            |                                    |    |                                                            |    |                                                                                   |    |                                                                                 |    |                                                                                 |    |                         |    |                             |    |                                           |    |                                      |    |                                         |    |                  |    |                          |    |                        |    |                              |    |                                |    |                        |    |
| Skin diseases, rashes, lumps                                                                                                                                                                                                             | 10                                                                                                                                                                                                                                                                                                                                                                                                                                                                                                                                                                                                                                                                                                                                                                                                                                                                                                                                                                                                                                                                           |                                    |    |                                                            |    |                                                                                   |    |                                                                                 |    |                                                                                 |    |                         |    |                             |    |                                           |    |                                      |    |                                         |    |                  |    |                          |    |                        |    |                              |    |                                |    |                        |    |
| Wounds                                                                                                                                                                                                                                   | 11                                                                                                                                                                                                                                                                                                                                                                                                                                                                                                                                                                                                                                                                                                                                                                                                                                                                                                                                                                                                                                                                           |                                    |    |                                                            |    |                                                                                   |    |                                                                                 |    |                                                                                 |    |                         |    |                             |    |                                           |    |                                      |    |                                         |    |                  |    |                          |    |                        |    |                              |    |                                |    |                        |    |
| Urinary tract infections                                                                                                                                                                                                                 | 12                                                                                                                                                                                                                                                                                                                                                                                                                                                                                                                                                                                                                                                                                                                                                                                                                                                                                                                                                                                                                                                                           |                                    |    |                                                            |    |                                                                                   |    |                                                                                 |    |                                                                                 |    |                         |    |                             |    |                                           |    |                                      |    |                                         |    |                  |    |                          |    |                        |    |                              |    |                                |    |                        |    |
| Every kind of sickness                                                                                                                                                                                                                   | 13                                                                                                                                                                                                                                                                                                                                                                                                                                                                                                                                                                                                                                                                                                                                                                                                                                                                                                                                                                                                                                                                           |                                    |    |                                                            |    |                                                                                   |    |                                                                                 |    |                                                                                 |    |                         |    |                             |    |                                           |    |                                      |    |                                         |    |                  |    |                          |    |                        |    |                              |    |                                |    |                        |    |
| Whatever the doctor suggests                                                                                                                                                                                                             | 14                                                                                                                                                                                                                                                                                                                                                                                                                                                                                                                                                                                                                                                                                                                                                                                                                                                                                                                                                                                                                                                                           |                                    |    |                                                            |    |                                                                                   |    |                                                                                 |    |                                                                                 |    |                         |    |                             |    |                                           |    |                                      |    |                                         |    |                  |    |                          |    |                        |    |                              |    |                                |    |                        |    |
| Don't know / prefer not to say                                                                                                                                                                                                           | 98                                                                                                                                                                                                                                                                                                                                                                                                                                                                                                                                                                                                                                                                                                                                                                                                                                                                                                                                                                                                                                                                           |                                    |    |                                                            |    |                                                                                   |    |                                                                                 |    |                                                                                 |    |                         |    |                             |    |                                           |    |                                      |    |                                         |    |                  |    |                          |    |                        |    |                              |    |                                |    |                        |    |
| Other (specify: _____)                                                                                                                                                                                                                   | 99                                                                                                                                                                                                                                                                                                                                                                                                                                                                                                                                                                                                                                                                                                                                                                                                                                                                                                                                                                                                                                                                           |                                    |    |                                                            |    |                                                                                   |    |                                                                                 |    |                                                                                 |    |                         |    |                             |    |                                           |    |                                      |    |                                         |    |                  |    |                          |    |                        |    |                              |    |                                |    |                        |    |
| <p><b>16.4.</b> Is there any situation for which you would buy this medicine?</p>                                                                                                                                                        | <table border="0"> <tr><td>Desirable attitude/knowledge</td><td>1</td></tr> <tr><td>Undesirable attitude/knowledge</td><td>0</td></tr> <tr><td>No attitude / refuse to answer (respondent is aware, but doesn't reveal attitude)</td><td>97</td></tr> <tr><td>Answer does not apply to question (respondent may be aware/unaware; satisfying)</td><td>98</td></tr> <tr><td>Not aware of this medicine (awkward, cannot answer but does not try to satisfy)</td><td>99</td></tr> </table>                                                                                                                                                                                                                                                                                                                                                                                                                                                                                                                                                                                     | Desirable attitude/knowledge       | 1  | Undesirable attitude/knowledge                             | 0  | No attitude / refuse to answer (respondent is aware, but doesn't reveal attitude) | 97 | Answer does not apply to question (respondent may be aware/unaware; satisfying) | 98 | Not aware of this medicine (awkward, cannot answer but does not try to satisfy) | 99 |                         |    |                             |    |                                           |    |                                      |    |                                         |    |                  |    |                          |    |                        |    |                              |    |                                |    |                        |    |
| Desirable attitude/knowledge                                                                                                                                                                                                             | 1                                                                                                                                                                                                                                                                                                                                                                                                                                                                                                                                                                                                                                                                                                                                                                                                                                                                                                                                                                                                                                                                            |                                    |    |                                                            |    |                                                                                   |    |                                                                                 |    |                                                                                 |    |                         |    |                             |    |                                           |    |                                      |    |                                         |    |                  |    |                          |    |                        |    |                              |    |                                |    |                        |    |
| Undesirable attitude/knowledge                                                                                                                                                                                                           | 0                                                                                                                                                                                                                                                                                                                                                                                                                                                                                                                                                                                                                                                                                                                                                                                                                                                                                                                                                                                                                                                                            |                                    |    |                                                            |    |                                                                                   |    |                                                                                 |    |                                                                                 |    |                         |    |                             |    |                                           |    |                                      |    |                                         |    |                  |    |                          |    |                        |    |                              |    |                                |    |                        |    |
| No attitude / refuse to answer (respondent is aware, but doesn't reveal attitude)                                                                                                                                                        | 97                                                                                                                                                                                                                                                                                                                                                                                                                                                                                                                                                                                                                                                                                                                                                                                                                                                                                                                                                                                                                                                                           |                                    |    |                                                            |    |                                                                                   |    |                                                                                 |    |                                                                                 |    |                         |    |                             |    |                                           |    |                                      |    |                                         |    |                  |    |                          |    |                        |    |                              |    |                                |    |                        |    |
| Answer does not apply to question (respondent may be aware/unaware; satisfying)                                                                                                                                                          | 98                                                                                                                                                                                                                                                                                                                                                                                                                                                                                                                                                                                                                                                                                                                                                                                                                                                                                                                                                                                                                                                                           |                                    |    |                                                            |    |                                                                                   |    |                                                                                 |    |                                                                                 |    |                         |    |                             |    |                                           |    |                                      |    |                                         |    |                  |    |                          |    |                        |    |                              |    |                                |    |                        |    |
| Not aware of this medicine (awkward, cannot answer but does not try to satisfy)                                                                                                                                                          | 99                                                                                                                                                                                                                                                                                                                                                                                                                                                                                                                                                                                                                                                                                                                                                                                                                                                                                                                                                                                                                                                                           |                                    |    |                                                            |    |                                                                                   |    |                                                                                 |    |                                                                                 |    |                         |    |                             |    |                                           |    |                                      |    |                                         |    |                  |    |                          |    |                        |    |                              |    |                                |    |                        |    |
| <p><b>16.5.</b> Do you prefer other remedies such as herbs or cough syrup to this medicine for [sore throat]?</p>                                                                                                                        | <table border="0"> <tr><td>Desirable attitude/knowledge</td><td>1</td></tr> <tr><td>Undesirable attitude/knowledge</td><td>0</td></tr> <tr><td>No attitude / refuse to answer (respondent is aware, but doesn't reveal attitude)</td><td>97</td></tr> <tr><td>Answer does not apply to question (respondent may be aware/unaware; satisfying)</td><td>98</td></tr> <tr><td>Not aware of this medicine (awkward, cannot answer but does not try to satisfy)</td><td>99</td></tr> </table>                                                                                                                                                                                                                                                                                                                                                                                                                                                                                                                                                                                     | Desirable attitude/knowledge       | 1  | Undesirable attitude/knowledge                             | 0  | No attitude / refuse to answer (respondent is aware, but doesn't reveal attitude) | 97 | Answer does not apply to question (respondent may be aware/unaware; satisfying) | 98 | Not aware of this medicine (awkward, cannot answer but does not try to satisfy) | 99 |                         |    |                             |    |                                           |    |                                      |    |                                         |    |                  |    |                          |    |                        |    |                              |    |                                |    |                        |    |
| Desirable attitude/knowledge                                                                                                                                                                                                             | 1                                                                                                                                                                                                                                                                                                                                                                                                                                                                                                                                                                                                                                                                                                                                                                                                                                                                                                                                                                                                                                                                            |                                    |    |                                                            |    |                                                                                   |    |                                                                                 |    |                                                                                 |    |                         |    |                             |    |                                           |    |                                      |    |                                         |    |                  |    |                          |    |                        |    |                              |    |                                |    |                        |    |
| Undesirable attitude/knowledge                                                                                                                                                                                                           | 0                                                                                                                                                                                                                                                                                                                                                                                                                                                                                                                                                                                                                                                                                                                                                                                                                                                                                                                                                                                                                                                                            |                                    |    |                                                            |    |                                                                                   |    |                                                                                 |    |                                                                                 |    |                         |    |                             |    |                                           |    |                                      |    |                                         |    |                  |    |                          |    |                        |    |                              |    |                                |    |                        |    |
| No attitude / refuse to answer (respondent is aware, but doesn't reveal attitude)                                                                                                                                                        | 97                                                                                                                                                                                                                                                                                                                                                                                                                                                                                                                                                                                                                                                                                                                                                                                                                                                                                                                                                                                                                                                                           |                                    |    |                                                            |    |                                                                                   |    |                                                                                 |    |                                                                                 |    |                         |    |                             |    |                                           |    |                                      |    |                                         |    |                  |    |                          |    |                        |    |                              |    |                                |    |                        |    |
| Answer does not apply to question (respondent may be aware/unaware; satisfying)                                                                                                                                                          | 98                                                                                                                                                                                                                                                                                                                                                                                                                                                                                                                                                                                                                                                                                                                                                                                                                                                                                                                                                                                                                                                                           |                                    |    |                                                            |    |                                                                                   |    |                                                                                 |    |                                                                                 |    |                         |    |                             |    |                                           |    |                                      |    |                                         |    |                  |    |                          |    |                        |    |                              |    |                                |    |                        |    |
| Not aware of this medicine (awkward, cannot answer but does not try to satisfy)                                                                                                                                                          | 99                                                                                                                                                                                                                                                                                                                                                                                                                                                                                                                                                                                                                                                                                                                                                                                                                                                                                                                                                                                                                                                                           |                                    |    |                                                            |    |                                                                                   |    |                                                                                 |    |                                                                                 |    |                         |    |                             |    |                                           |    |                                      |    |                                         |    |                  |    |                          |    |                        |    |                              |    |                                |    |                        |    |
| <p><b>16.6.</b> If you were prescribed this medicine by a doctor and did not finish the course, would you keep it for future use?</p>                                                                                                    | <table border="0"> <tr><td>Desirable attitude/knowledge</td><td>1</td></tr> <tr><td>Undesirable attitude/knowledge</td><td>0</td></tr> <tr><td>No attitude / refuse to answer (respondent is aware, but doesn't reveal attitude)</td><td>97</td></tr> <tr><td>Answer does not apply to question (respondent may be aware/unaware; satisfying)</td><td>98</td></tr> <tr><td>Not aware of this medicine (awkward, cannot answer but does not try to satisfy)</td><td>99</td></tr> </table>                                                                                                                                                                                                                                                                                                                                                                                                                                                                                                                                                                                     | Desirable attitude/knowledge       | 1  | Undesirable attitude/knowledge                             | 0  | No attitude / refuse to answer (respondent is aware, but doesn't reveal attitude) | 97 | Answer does not apply to question (respondent may be aware/unaware; satisfying) | 98 | Not aware of this medicine (awkward, cannot answer but does not try to satisfy) | 99 |                         |    |                             |    |                                           |    |                                      |    |                                         |    |                  |    |                          |    |                        |    |                              |    |                                |    |                        |    |
| Desirable attitude/knowledge                                                                                                                                                                                                             | 1                                                                                                                                                                                                                                                                                                                                                                                                                                                                                                                                                                                                                                                                                                                                                                                                                                                                                                                                                                                                                                                                            |                                    |    |                                                            |    |                                                                                   |    |                                                                                 |    |                                                                                 |    |                         |    |                             |    |                                           |    |                                      |    |                                         |    |                  |    |                          |    |                        |    |                              |    |                                |    |                        |    |
| Undesirable attitude/knowledge                                                                                                                                                                                                           | 0                                                                                                                                                                                                                                                                                                                                                                                                                                                                                                                                                                                                                                                                                                                                                                                                                                                                                                                                                                                                                                                                            |                                    |    |                                                            |    |                                                                                   |    |                                                                                 |    |                                                                                 |    |                         |    |                             |    |                                           |    |                                      |    |                                         |    |                  |    |                          |    |                        |    |                              |    |                                |    |                        |    |
| No attitude / refuse to answer (respondent is aware, but doesn't reveal attitude)                                                                                                                                                        | 97                                                                                                                                                                                                                                                                                                                                                                                                                                                                                                                                                                                                                                                                                                                                                                                                                                                                                                                                                                                                                                                                           |                                    |    |                                                            |    |                                                                                   |    |                                                                                 |    |                                                                                 |    |                         |    |                             |    |                                           |    |                                      |    |                                         |    |                  |    |                          |    |                        |    |                              |    |                                |    |                        |    |
| Answer does not apply to question (respondent may be aware/unaware; satisfying)                                                                                                                                                          | 98                                                                                                                                                                                                                                                                                                                                                                                                                                                                                                                                                                                                                                                                                                                                                                                                                                                                                                                                                                                                                                                                           |                                    |    |                                                            |    |                                                                                   |    |                                                                                 |    |                                                                                 |    |                         |    |                             |    |                                           |    |                                      |    |                                         |    |                  |    |                          |    |                        |    |                              |    |                                |    |                        |    |
| Not aware of this medicine (awkward, cannot answer but does not try to satisfy)                                                                                                                                                          | 99                                                                                                                                                                                                                                                                                                                                                                                                                                                                                                                                                                                                                                                                                                                                                                                                                                                                                                                                                                                                                                                                           |                                    |    |                                                            |    |                                                                                   |    |                                                                                 |    |                                                                                 |    |                         |    |                             |    |                                           |    |                                      |    |                                         |    |                  |    |                          |    |                        |    |                              |    |                                |    |                        |    |
| <p><b>16.7.</b> Have you heard about drug resistance?<br/> <b>(16.7a</b> using alternative term "lueng yah" in Lao)</p>                                                                                                                  | <p>Yes ..... 1<br/>                 No ..... 2</p>                                                                                                                                                                                                                                                                                                                                                                                                                                                                                                                                                                                                                                                                                                                                                                                                                                                                                                                                                                                                                           |                                    |    |                                                            |    |                                                                                   |    |                                                                                 |    |                                                                                 |    |                         |    |                             |    |                                           |    |                                      |    |                                         |    |                  |    |                          |    |                        |    |                              |    |                                |    |                        |    |
| <p><b>16.8.</b> What do you think is drug resistance?<br/> <b>(16.8a</b> using alternative term "lueng yah" in Lao)</p>                                                                                                                  | <table border="0"> <tr><td>Bacteria are resistant to medicine</td><td>1</td></tr> <tr><td>Antibiotics become less effective if used wrongly/too much</td><td>2</td></tr> <tr><td>Medicine in general becomes less effective if used wrongly/too much</td><td>3</td></tr> <tr><td>Being stubborn to take medicine</td><td>4</td></tr> <tr><td>Being addicted to medicine</td><td>5</td></tr> <tr><td>Drug allergy</td><td>6</td></tr> <tr><td>Lueng yah (drug resistance)</td><td>7</td></tr> <tr><td>Answer does not relate to drug resistance</td><td>8</td></tr> <tr><td>Other (specify)</td><td>98</td></tr> <tr><td>"Don't know"</td><td>99</td></tr> </table>                                                                                                                                                                                                                                                                                                                                                                                                           | Bacteria are resistant to medicine | 1  | Antibiotics become less effective if used wrongly/too much | 2  | Medicine in general becomes less effective if used wrongly/too much               | 3  | Being stubborn to take medicine                                                 | 4  | Being addicted to medicine                                                      | 5  | Drug allergy            | 6  | Lueng yah (drug resistance) | 7  | Answer does not relate to drug resistance | 8  | Other (specify)                      | 98 | "Don't know"                            | 99 |                  |    |                          |    |                        |    |                              |    |                                |    |                        |    |
| Bacteria are resistant to medicine                                                                                                                                                                                                       | 1                                                                                                                                                                                                                                                                                                                                                                                                                                                                                                                                                                                                                                                                                                                                                                                                                                                                                                                                                                                                                                                                            |                                    |    |                                                            |    |                                                                                   |    |                                                                                 |    |                                                                                 |    |                         |    |                             |    |                                           |    |                                      |    |                                         |    |                  |    |                          |    |                        |    |                              |    |                                |    |                        |    |
| Antibiotics become less effective if used wrongly/too much                                                                                                                                                                               | 2                                                                                                                                                                                                                                                                                                                                                                                                                                                                                                                                                                                                                                                                                                                                                                                                                                                                                                                                                                                                                                                                            |                                    |    |                                                            |    |                                                                                   |    |                                                                                 |    |                                                                                 |    |                         |    |                             |    |                                           |    |                                      |    |                                         |    |                  |    |                          |    |                        |    |                              |    |                                |    |                        |    |
| Medicine in general becomes less effective if used wrongly/too much                                                                                                                                                                      | 3                                                                                                                                                                                                                                                                                                                                                                                                                                                                                                                                                                                                                                                                                                                                                                                                                                                                                                                                                                                                                                                                            |                                    |    |                                                            |    |                                                                                   |    |                                                                                 |    |                                                                                 |    |                         |    |                             |    |                                           |    |                                      |    |                                         |    |                  |    |                          |    |                        |    |                              |    |                                |    |                        |    |
| Being stubborn to take medicine                                                                                                                                                                                                          | 4                                                                                                                                                                                                                                                                                                                                                                                                                                                                                                                                                                                                                                                                                                                                                                                                                                                                                                                                                                                                                                                                            |                                    |    |                                                            |    |                                                                                   |    |                                                                                 |    |                                                                                 |    |                         |    |                             |    |                                           |    |                                      |    |                                         |    |                  |    |                          |    |                        |    |                              |    |                                |    |                        |    |
| Being addicted to medicine                                                                                                                                                                                                               | 5                                                                                                                                                                                                                                                                                                                                                                                                                                                                                                                                                                                                                                                                                                                                                                                                                                                                                                                                                                                                                                                                            |                                    |    |                                                            |    |                                                                                   |    |                                                                                 |    |                                                                                 |    |                         |    |                             |    |                                           |    |                                      |    |                                         |    |                  |    |                          |    |                        |    |                              |    |                                |    |                        |    |
| Drug allergy                                                                                                                                                                                                                             | 6                                                                                                                                                                                                                                                                                                                                                                                                                                                                                                                                                                                                                                                                                                                                                                                                                                                                                                                                                                                                                                                                            |                                    |    |                                                            |    |                                                                                   |    |                                                                                 |    |                                                                                 |    |                         |    |                             |    |                                           |    |                                      |    |                                         |    |                  |    |                          |    |                        |    |                              |    |                                |    |                        |    |
| Lueng yah (drug resistance)                                                                                                                                                                                                              | 7                                                                                                                                                                                                                                                                                                                                                                                                                                                                                                                                                                                                                                                                                                                                                                                                                                                                                                                                                                                                                                                                            |                                    |    |                                                            |    |                                                                                   |    |                                                                                 |    |                                                                                 |    |                         |    |                             |    |                                           |    |                                      |    |                                         |    |                  |    |                          |    |                        |    |                              |    |                                |    |                        |    |
| Answer does not relate to drug resistance                                                                                                                                                                                                | 8                                                                                                                                                                                                                                                                                                                                                                                                                                                                                                                                                                                                                                                                                                                                                                                                                                                                                                                                                                                                                                                                            |                                    |    |                                                            |    |                                                                                   |    |                                                                                 |    |                                                                                 |    |                         |    |                             |    |                                           |    |                                      |    |                                         |    |                  |    |                          |    |                        |    |                              |    |                                |    |                        |    |
| Other (specify)                                                                                                                                                                                                                          | 98                                                                                                                                                                                                                                                                                                                                                                                                                                                                                                                                                                                                                                                                                                                                                                                                                                                                                                                                                                                                                                                                           |                                    |    |                                                            |    |                                                                                   |    |                                                                                 |    |                                                                                 |    |                         |    |                             |    |                                           |    |                                      |    |                                         |    |                  |    |                          |    |                        |    |                              |    |                                |    |                        |    |
| "Don't know"                                                                                                                                                                                                                             | 99                                                                                                                                                                                                                                                                                                                                                                                                                                                                                                                                                                                                                                                                                                                                                                                                                                                                                                                                                                                                                                                                           |                                    |    |                                                            |    |                                                                                   |    |                                                                                 |    |                                                                                 |    |                         |    |                             |    |                                           |    |                                      |    |                                         |    |                  |    |                          |    |                        |    |                              |    |                                |    |                        |    |
| <p><b>16.9.</b> Can your drug resistance ("due yah") spread to other people, for example if you sneeze on them?</p>                                                                                                                      | <table border="0"> <tr><td>Desirable attitude/knowledge</td><td>1</td></tr> <tr><td>Undesirable attitude/knowledge</td><td>0</td></tr> <tr><td>No attitude / refuse to answer (respondent is aware, but doesn't reveal attitude)</td><td>97</td></tr> <tr><td>Answer does not apply to question (respondent may be aware/unaware; satisfying)</td><td>98</td></tr> <tr><td>Not aware of this medicine (awkward, cannot answer but does not try to satisfy)</td><td>99</td></tr> </table>                                                                                                                                                                                                                                                                                                                                                                                                                                                                                                                                                                                     | Desirable attitude/knowledge       | 1  | Undesirable attitude/knowledge                             | 0  | No attitude / refuse to answer (respondent is aware, but doesn't reveal attitude) | 97 | Answer does not apply to question (respondent may be aware/unaware; satisfying) | 98 | Not aware of this medicine (awkward, cannot answer but does not try to satisfy) | 99 |                         |    |                             |    |                                           |    |                                      |    |                                         |    |                  |    |                          |    |                        |    |                              |    |                                |    |                        |    |
| Desirable attitude/knowledge                                                                                                                                                                                                             | 1                                                                                                                                                                                                                                                                                                                                                                                                                                                                                                                                                                                                                                                                                                                                                                                                                                                                                                                                                                                                                                                                            |                                    |    |                                                            |    |                                                                                   |    |                                                                                 |    |                                                                                 |    |                         |    |                             |    |                                           |    |                                      |    |                                         |    |                  |    |                          |    |                        |    |                              |    |                                |    |                        |    |
| Undesirable attitude/knowledge                                                                                                                                                                                                           | 0                                                                                                                                                                                                                                                                                                                                                                                                                                                                                                                                                                                                                                                                                                                                                                                                                                                                                                                                                                                                                                                                            |                                    |    |                                                            |    |                                                                                   |    |                                                                                 |    |                                                                                 |    |                         |    |                             |    |                                           |    |                                      |    |                                         |    |                  |    |                          |    |                        |    |                              |    |                                |    |                        |    |
| No attitude / refuse to answer (respondent is aware, but doesn't reveal attitude)                                                                                                                                                        | 97                                                                                                                                                                                                                                                                                                                                                                                                                                                                                                                                                                                                                                                                                                                                                                                                                                                                                                                                                                                                                                                                           |                                    |    |                                                            |    |                                                                                   |    |                                                                                 |    |                                                                                 |    |                         |    |                             |    |                                           |    |                                      |    |                                         |    |                  |    |                          |    |                        |    |                              |    |                                |    |                        |    |
| Answer does not apply to question (respondent may be aware/unaware; satisfying)                                                                                                                                                          | 98                                                                                                                                                                                                                                                                                                                                                                                                                                                                                                                                                                                                                                                                                                                                                                                                                                                                                                                                                                                                                                                                           |                                    |    |                                                            |    |                                                                                   |    |                                                                                 |    |                                                                                 |    |                         |    |                             |    |                                           |    |                                      |    |                                         |    |                  |    |                          |    |                        |    |                              |    |                                |    |                        |    |
| Not aware of this medicine (awkward, cannot answer but does not try to satisfy)                                                                                                                                                          | 99                                                                                                                                                                                                                                                                                                                                                                                                                                                                                                                                                                                                                                                                                                                                                                                                                                                                                                                                                                                                                                                                           |                                    |    |                                                            |    |                                                                                   |    |                                                                                 |    |                                                                                 |    |                         |    |                             |    |                                           |    |                                      |    |                                         |    |                  |    |                          |    |                        |    |                              |    |                                |    |                        |    |

| Part IV: Household assets                                                                                                                                                            |                                                                                                                                                                    |                            |   |
|--------------------------------------------------------------------------------------------------------------------------------------------------------------------------------------|--------------------------------------------------------------------------------------------------------------------------------------------------------------------|----------------------------|---|
| We now come to the last part. Can you please provide me with some information about your household?                                                                                  |                                                                                                                                                                    |                            |   |
| 17. How many rooms does this house have apart from toilet and hallways?                                                                                                              | Number of rooms: _____                                                                                                                                             |                            |   |
| 18. What is the electricity situation in your household on a typical day?                                                                                                            | Power at all times, no power cuts (90-100%) .....                                                                                                                  | 1                          |   |
|                                                                                                                                                                                      | Power most of the time, occasional power cuts (>50%) .....                                                                                                         | 2                          |   |
|                                                                                                                                                                                      | Power sometimes, frequent power cuts (<50%) .....                                                                                                                  | 3                          |   |
|                                                                                                                                                                                      | No electricity .....                                                                                                                                               | 4                          |   |
| 19. What kind of toilet does this house have and is it shared with other people in this community?<br>[if more than one, choose "best" toilet] [use show card to facilitate answers] | Unshared flush toilet (e.g. piped sewer system, septic tank, pour flush toilet).....                                                                               | 1                          |   |
|                                                                                                                                                                                      | Shared (flush or non-flush) toilet with other community members or public toilet                                                                                   | 2                          |   |
|                                                                                                                                                                                      | No facility, Bush, Field, or others.....                                                                                                                           | 3                          |   |
| 20. What is the drinking water source of this house and is it shared with other people in this community?<br>[use show card to facilitate answers]                                   | Water piped into house or yard.....                                                                                                                                | 1                          |   |
|                                                                                                                                                                                      | Water not directly piped into house or yard (e.g. well, borehole, water from spring, rainwater, tanker truck, surface water including rivers, bottled water, etc.) | 2                          |   |
| 21. What kind of fuel does this household use for cooking?                                                                                                                           | Improved fuel source (e.g. Electricity, gas stove, etc.).....                                                                                                      | 1                          |   |
|                                                                                                                                                                                      | Unimproved fuel source (e.g. Coal / Lignite, Charcoal, Wood, Straw / Shrubs / Grass, Animal dung, Agricultural crop residue) .....                                 | 2                          |   |
|                                                                                                                                                                                      | No food cooked in household.....                                                                                                                                   | 3                          |   |
| 22. I will now ask you for some items in your household. Please tell me...                                                                                                           | Number of items in household: _____                                                                                                                                |                            |   |
|                                                                                                                                                                                      | 22.1. Have you got a <i>functioning</i> radio in your household? If so, how many?                                                                                  | ___                        |   |
|                                                                                                                                                                                      | 22.2. Have you got a <i>functioning</i> TV in your household? If so, how many?                                                                                     | ___                        |   |
|                                                                                                                                                                                      | 22.3. Have you got a <i>functioning</i> rice cooker in your household? If so, how many?                                                                            | ___                        |   |
|                                                                                                                                                                                      | 22.4. Have you got a <i>functioning</i> landline telephone in your household? If so, how many?                                                                     | ___                        |   |
|                                                                                                                                                                                      | 22.5. Have you got a <i>functioning</i> mobile phone in your household? If so, how many?                                                                           | ___                        |   |
|                                                                                                                                                                                      | 22.6. Have you got a <i>functioning</i> computer in your household? If so, how many?                                                                               | ___                        |   |
|                                                                                                                                                                                      | 22.7. Have you got a <i>functioning</i> bicycle in your household? If so, how many?                                                                                | ___                        |   |
|                                                                                                                                                                                      | 22.8. Have you got a <i>functioning</i> scooter, motorcycle, or tricycle in your household? If so, how many?                                                       | ___                        |   |
|                                                                                                                                                                                      | 22.9. Have you got a <i>functioning</i> car or truck in your household? If so, how many?                                                                           | ___                        |   |
|                                                                                                                                                                                      | 22.10. Have you got a <i>functioning</i> tractor in your household? If so, how many?                                                                               | ___                        |   |
| 23. How long does it normally take you to get to the following places?                                                                                                               | 23.1. How long does it take to get to the nearest market?                                                                                                          | Less than 10 minutes ..... | 1 |
|                                                                                                                                                                                      |                                                                                                                                                                    | 10 to 29 minutes .....     | 2 |
|                                                                                                                                                                                      |                                                                                                                                                                    | 30 to 59 minutes .....     | 3 |
|                                                                                                                                                                                      | 23.2. How long does it take to get to the village hall or the village head's house?                                                                                | 60 to 119 minutes .....    | 4 |
|                                                                                                                                                                                      |                                                                                                                                                                    | 2 hours or more.....       | 5 |
|                                                                                                                                                                                      |                                                                                                                                                                    | Less than 10 minutes ..... | 1 |
|                                                                                                                                                                                      |                                                                                                                                                                    | 10 to 29 minutes .....     | 2 |
|                                                                                                                                                                                      |                                                                                                                                                                    | 30 to 59 minutes .....     | 3 |
|                                                                                                                                                                                      | 23.3. How long does it take to get to the nearest public or private doctor?                                                                                        | 60 to 119 minutes .....    | 4 |
| 2 hours or more.....                                                                                                                                                                 |                                                                                                                                                                    | 5                          |   |
| Less than 10 minutes .....                                                                                                                                                           |                                                                                                                                                                    | 1                          |   |
| 10 to 29 minutes .....                                                                                                                                                               |                                                                                                                                                                    | 2                          |   |
| 30 to 59 minutes .....                                                                                                                                                               |                                                                                                                                                                    | 3                          |   |
| 24. What is your religion?                                                                                                                                                           | 60 to 119 minutes .....                                                                                                                                            | 4                          |   |
|                                                                                                                                                                                      | 2 hours or more.....                                                                                                                                               | 5                          |   |
|                                                                                                                                                                                      | No religion .....                                                                                                                                                  | 0                          |   |
|                                                                                                                                                                                      | Buddhist.....                                                                                                                                                      | 1                          |   |
|                                                                                                                                                                                      | Christian.....                                                                                                                                                     | 2                          |   |
|                                                                                                                                                                                      | Muslim .....                                                                                                                                                       | 3                          |   |
| 25. What is your nationality?                                                                                                                                                        | Spirit (religious belief in Lao).....                                                                                                                              | 4                          |   |
|                                                                                                                                                                                      | Other (Specify) .....                                                                                                                                              | 5                          |   |
|                                                                                                                                                                                      | Don't know .....                                                                                                                                                   | 99                         |   |
|                                                                                                                                                                                      | Thai .....                                                                                                                                                         | 1                          |   |
|                                                                                                                                                                                      | Lao.....                                                                                                                                                           | 2                          |   |
|                                                                                                                                                                                      | Myanmar/Burmese .....                                                                                                                                              | 3                          |   |
| Chinese .....                                                                                                                                                                        | 4                                                                                                                                                                  |                            |   |
| Other (Specify) .....                                                                                                                                                                | 9                                                                                                                                                                  |                            |   |
| Don't know .....                                                                                                                                                                     | 99                                                                                                                                                                 |                            |   |

|                                                                                              |                                                                                                                                                                                                                                                                                                                                                                                                                                                                                                                                                                                                                                                                                                                                                                                                                                                                                                                                                                                                                                                                                                                                                                                                                                                                                                                                                            |                         |   |                                        |   |                            |   |                          |   |                       |   |                    |   |                    |   |                  |   |               |   |                        |    |                     |    |           |    |               |    |                      |    |                |    |                       |    |                  |    |
|----------------------------------------------------------------------------------------------|------------------------------------------------------------------------------------------------------------------------------------------------------------------------------------------------------------------------------------------------------------------------------------------------------------------------------------------------------------------------------------------------------------------------------------------------------------------------------------------------------------------------------------------------------------------------------------------------------------------------------------------------------------------------------------------------------------------------------------------------------------------------------------------------------------------------------------------------------------------------------------------------------------------------------------------------------------------------------------------------------------------------------------------------------------------------------------------------------------------------------------------------------------------------------------------------------------------------------------------------------------------------------------------------------------------------------------------------------------|-------------------------|---|----------------------------------------|---|----------------------------|---|--------------------------|---|-----------------------|---|--------------------|---|--------------------|---|------------------|---|---------------|---|------------------------|----|---------------------|----|-----------|----|---------------|----|----------------------|----|----------------|----|-----------------------|----|------------------|----|
| <p>26. What is your ethnic background?</p>                                                   | <table style="width: 100%; border-collapse: collapse;"> <tr><td>Thai .....</td><td style="text-align: right;">1</td></tr> <tr><td>Tai Yai .....</td><td style="text-align: right;">2</td></tr> <tr><td>Akha (E-Koh) .....</td><td style="text-align: right;">3</td></tr> <tr><td>Pakakeryor (Karen) .....</td><td style="text-align: right;">4</td></tr> <tr><td>Lahu (Muser) .....</td><td style="text-align: right;">5</td></tr> <tr><td>Lisu (Lisaw) .....</td><td style="text-align: right;">6</td></tr> <tr><td>Hmong (Meaw) .....</td><td style="text-align: right;">7</td></tr> <tr><td>Mien (Yao) .....</td><td style="text-align: right;">8</td></tr> <tr><td>Burmese .....</td><td style="text-align: right;">9</td></tr> <tr><td>Yunnan (Jin Haw) .....</td><td style="text-align: right;">10</td></tr> <tr><td>Tai Lue (Tai) .....</td><td style="text-align: right;">11</td></tr> <tr><td>Lao .....</td><td style="text-align: right;">21</td></tr> <tr><td>Kathuic .....</td><td style="text-align: right;">22</td></tr> <tr><td>Bahnaric Khmer .....</td><td style="text-align: right;">23</td></tr> <tr><td>Tai Thai .....</td><td style="text-align: right;">24</td></tr> <tr><td>Other (Specify) .....</td><td style="text-align: right;">30</td></tr> <tr><td>Don't know .....</td><td style="text-align: right;">99</td></tr> </table> | Thai .....              | 1 | Tai Yai .....                          | 2 | Akha (E-Koh) .....         | 3 | Pakakeryor (Karen) ..... | 4 | Lahu (Muser) .....    | 5 | Lisu (Lisaw) ..... | 6 | Hmong (Meaw) ..... | 7 | Mien (Yao) ..... | 8 | Burmese ..... | 9 | Yunnan (Jin Haw) ..... | 10 | Tai Lue (Tai) ..... | 11 | Lao ..... | 21 | Kathuic ..... | 22 | Bahnaric Khmer ..... | 23 | Tai Thai ..... | 24 | Other (Specify) ..... | 30 | Don't know ..... | 99 |
| Thai .....                                                                                   | 1                                                                                                                                                                                                                                                                                                                                                                                                                                                                                                                                                                                                                                                                                                                                                                                                                                                                                                                                                                                                                                                                                                                                                                                                                                                                                                                                                          |                         |   |                                        |   |                            |   |                          |   |                       |   |                    |   |                    |   |                  |   |               |   |                        |    |                     |    |           |    |               |    |                      |    |                |    |                       |    |                  |    |
| Tai Yai .....                                                                                | 2                                                                                                                                                                                                                                                                                                                                                                                                                                                                                                                                                                                                                                                                                                                                                                                                                                                                                                                                                                                                                                                                                                                                                                                                                                                                                                                                                          |                         |   |                                        |   |                            |   |                          |   |                       |   |                    |   |                    |   |                  |   |               |   |                        |    |                     |    |           |    |               |    |                      |    |                |    |                       |    |                  |    |
| Akha (E-Koh) .....                                                                           | 3                                                                                                                                                                                                                                                                                                                                                                                                                                                                                                                                                                                                                                                                                                                                                                                                                                                                                                                                                                                                                                                                                                                                                                                                                                                                                                                                                          |                         |   |                                        |   |                            |   |                          |   |                       |   |                    |   |                    |   |                  |   |               |   |                        |    |                     |    |           |    |               |    |                      |    |                |    |                       |    |                  |    |
| Pakakeryor (Karen) .....                                                                     | 4                                                                                                                                                                                                                                                                                                                                                                                                                                                                                                                                                                                                                                                                                                                                                                                                                                                                                                                                                                                                                                                                                                                                                                                                                                                                                                                                                          |                         |   |                                        |   |                            |   |                          |   |                       |   |                    |   |                    |   |                  |   |               |   |                        |    |                     |    |           |    |               |    |                      |    |                |    |                       |    |                  |    |
| Lahu (Muser) .....                                                                           | 5                                                                                                                                                                                                                                                                                                                                                                                                                                                                                                                                                                                                                                                                                                                                                                                                                                                                                                                                                                                                                                                                                                                                                                                                                                                                                                                                                          |                         |   |                                        |   |                            |   |                          |   |                       |   |                    |   |                    |   |                  |   |               |   |                        |    |                     |    |           |    |               |    |                      |    |                |    |                       |    |                  |    |
| Lisu (Lisaw) .....                                                                           | 6                                                                                                                                                                                                                                                                                                                                                                                                                                                                                                                                                                                                                                                                                                                                                                                                                                                                                                                                                                                                                                                                                                                                                                                                                                                                                                                                                          |                         |   |                                        |   |                            |   |                          |   |                       |   |                    |   |                    |   |                  |   |               |   |                        |    |                     |    |           |    |               |    |                      |    |                |    |                       |    |                  |    |
| Hmong (Meaw) .....                                                                           | 7                                                                                                                                                                                                                                                                                                                                                                                                                                                                                                                                                                                                                                                                                                                                                                                                                                                                                                                                                                                                                                                                                                                                                                                                                                                                                                                                                          |                         |   |                                        |   |                            |   |                          |   |                       |   |                    |   |                    |   |                  |   |               |   |                        |    |                     |    |           |    |               |    |                      |    |                |    |                       |    |                  |    |
| Mien (Yao) .....                                                                             | 8                                                                                                                                                                                                                                                                                                                                                                                                                                                                                                                                                                                                                                                                                                                                                                                                                                                                                                                                                                                                                                                                                                                                                                                                                                                                                                                                                          |                         |   |                                        |   |                            |   |                          |   |                       |   |                    |   |                    |   |                  |   |               |   |                        |    |                     |    |           |    |               |    |                      |    |                |    |                       |    |                  |    |
| Burmese .....                                                                                | 9                                                                                                                                                                                                                                                                                                                                                                                                                                                                                                                                                                                                                                                                                                                                                                                                                                                                                                                                                                                                                                                                                                                                                                                                                                                                                                                                                          |                         |   |                                        |   |                            |   |                          |   |                       |   |                    |   |                    |   |                  |   |               |   |                        |    |                     |    |           |    |               |    |                      |    |                |    |                       |    |                  |    |
| Yunnan (Jin Haw) .....                                                                       | 10                                                                                                                                                                                                                                                                                                                                                                                                                                                                                                                                                                                                                                                                                                                                                                                                                                                                                                                                                                                                                                                                                                                                                                                                                                                                                                                                                         |                         |   |                                        |   |                            |   |                          |   |                       |   |                    |   |                    |   |                  |   |               |   |                        |    |                     |    |           |    |               |    |                      |    |                |    |                       |    |                  |    |
| Tai Lue (Tai) .....                                                                          | 11                                                                                                                                                                                                                                                                                                                                                                                                                                                                                                                                                                                                                                                                                                                                                                                                                                                                                                                                                                                                                                                                                                                                                                                                                                                                                                                                                         |                         |   |                                        |   |                            |   |                          |   |                       |   |                    |   |                    |   |                  |   |               |   |                        |    |                     |    |           |    |               |    |                      |    |                |    |                       |    |                  |    |
| Lao .....                                                                                    | 21                                                                                                                                                                                                                                                                                                                                                                                                                                                                                                                                                                                                                                                                                                                                                                                                                                                                                                                                                                                                                                                                                                                                                                                                                                                                                                                                                         |                         |   |                                        |   |                            |   |                          |   |                       |   |                    |   |                    |   |                  |   |               |   |                        |    |                     |    |           |    |               |    |                      |    |                |    |                       |    |                  |    |
| Kathuic .....                                                                                | 22                                                                                                                                                                                                                                                                                                                                                                                                                                                                                                                                                                                                                                                                                                                                                                                                                                                                                                                                                                                                                                                                                                                                                                                                                                                                                                                                                         |                         |   |                                        |   |                            |   |                          |   |                       |   |                    |   |                    |   |                  |   |               |   |                        |    |                     |    |           |    |               |    |                      |    |                |    |                       |    |                  |    |
| Bahnaric Khmer .....                                                                         | 23                                                                                                                                                                                                                                                                                                                                                                                                                                                                                                                                                                                                                                                                                                                                                                                                                                                                                                                                                                                                                                                                                                                                                                                                                                                                                                                                                         |                         |   |                                        |   |                            |   |                          |   |                       |   |                    |   |                    |   |                  |   |               |   |                        |    |                     |    |           |    |               |    |                      |    |                |    |                       |    |                  |    |
| Tai Thai .....                                                                               | 24                                                                                                                                                                                                                                                                                                                                                                                                                                                                                                                                                                                                                                                                                                                                                                                                                                                                                                                                                                                                                                                                                                                                                                                                                                                                                                                                                         |                         |   |                                        |   |                            |   |                          |   |                       |   |                    |   |                    |   |                  |   |               |   |                        |    |                     |    |           |    |               |    |                      |    |                |    |                       |    |                  |    |
| Other (Specify) .....                                                                        | 30                                                                                                                                                                                                                                                                                                                                                                                                                                                                                                                                                                                                                                                                                                                                                                                                                                                                                                                                                                                                                                                                                                                                                                                                                                                                                                                                                         |                         |   |                                        |   |                            |   |                          |   |                       |   |                    |   |                    |   |                  |   |               |   |                        |    |                     |    |           |    |               |    |                      |    |                |    |                       |    |                  |    |
| Don't know .....                                                                             | 99                                                                                                                                                                                                                                                                                                                                                                                                                                                                                                                                                                                                                                                                                                                                                                                                                                                                                                                                                                                                                                                                                                                                                                                                                                                                                                                                                         |                         |   |                                        |   |                            |   |                          |   |                       |   |                    |   |                    |   |                  |   |               |   |                        |    |                     |    |           |    |               |    |                      |    |                |    |                       |    |                  |    |
| xi. Interview end time                                                                       | [time entered automatically]                                                                                                                                                                                                                                                                                                                                                                                                                                                                                                                                                                                                                                                                                                                                                                                                                                                                                                                                                                                                                                                                                                                                                                                                                                                                                                                               |                         |   |                                        |   |                            |   |                          |   |                       |   |                    |   |                    |   |                  |   |               |   |                        |    |                     |    |           |    |               |    |                      |    |                |    |                       |    |                  |    |
| Thank you very much for participating in this survey. [give gift to respondent]              |                                                                                                                                                                                                                                                                                                                                                                                                                                                                                                                                                                                                                                                                                                                                                                                                                                                                                                                                                                                                                                                                                                                                                                                                                                                                                                                                                            |                         |   |                                        |   |                            |   |                          |   |                       |   |                    |   |                    |   |                  |   |               |   |                        |    |                     |    |           |    |               |    |                      |    |                |    |                       |    |                  |    |
| <b>Part V: Interviewer observations [to be completed by interviewer after interview]</b>     |                                                                                                                                                                                                                                                                                                                                                                                                                                                                                                                                                                                                                                                                                                                                                                                                                                                                                                                                                                                                                                                                                                                                                                                                                                                                                                                                                            |                         |   |                                        |   |                            |   |                          |   |                       |   |                    |   |                    |   |                  |   |               |   |                        |    |                     |    |           |    |               |    |                      |    |                |    |                       |    |                  |    |
| xii. Was the interview completed?                                                            | <table style="width: 100%; border-collapse: collapse;"> <tr><td>Yes .....</td><td style="text-align: right;">1</td></tr> <tr><td>Yes, with difficulties .....</td><td style="text-align: right;">2</td></tr> <tr><td>No .....</td><td style="text-align: right;">3</td></tr> </table>                                                                                                                                                                                                                                                                                                                                                                                                                                                                                                                                                                                                                                                                                                                                                                                                                                                                                                                                                                                                                                                                      | Yes .....               | 1 | Yes, with difficulties .....           | 2 | No .....                   | 3 |                          |   |                       |   |                    |   |                    |   |                  |   |               |   |                        |    |                     |    |           |    |               |    |                      |    |                |    |                       |    |                  |    |
| Yes .....                                                                                    | 1                                                                                                                                                                                                                                                                                                                                                                                                                                                                                                                                                                                                                                                                                                                                                                                                                                                                                                                                                                                                                                                                                                                                                                                                                                                                                                                                                          |                         |   |                                        |   |                            |   |                          |   |                       |   |                    |   |                    |   |                  |   |               |   |                        |    |                     |    |           |    |               |    |                      |    |                |    |                       |    |                  |    |
| Yes, with difficulties .....                                                                 | 2                                                                                                                                                                                                                                                                                                                                                                                                                                                                                                                                                                                                                                                                                                                                                                                                                                                                                                                                                                                                                                                                                                                                                                                                                                                                                                                                                          |                         |   |                                        |   |                            |   |                          |   |                       |   |                    |   |                    |   |                  |   |               |   |                        |    |                     |    |           |    |               |    |                      |    |                |    |                       |    |                  |    |
| No .....                                                                                     | 3                                                                                                                                                                                                                                                                                                                                                                                                                                                                                                                                                                                                                                                                                                                                                                                                                                                                                                                                                                                                                                                                                                                                                                                                                                                                                                                                                          |                         |   |                                        |   |                            |   |                          |   |                       |   |                    |   |                    |   |                  |   |               |   |                        |    |                     |    |           |    |               |    |                      |    |                |    |                       |    |                  |    |
| xiii. Was someone else present during the interview?<br>[mark all that apply]                | <table style="width: 100%; border-collapse: collapse;"> <tr><td>Survey supervisor .....</td><td style="text-align: right;">1</td></tr> <tr><td>Other household or family member .....</td><td style="text-align: right;">2</td></tr> <tr><td>Medical practitioner .....</td><td style="text-align: right;">3</td></tr> <tr><td>Government officer .....</td><td style="text-align: right;">4</td></tr> <tr><td>Other (specify) .....</td><td style="text-align: right;">5</td></tr> <tr><td>No one .....</td><td style="text-align: right;">0</td></tr> </table>                                                                                                                                                                                                                                                                                                                                                                                                                                                                                                                                                                                                                                                                                                                                                                                           | Survey supervisor ..... | 1 | Other household or family member ..... | 2 | Medical practitioner ..... | 3 | Government officer ..... | 4 | Other (specify) ..... | 5 | No one .....       | 0 |                    |   |                  |   |               |   |                        |    |                     |    |           |    |               |    |                      |    |                |    |                       |    |                  |    |
| Survey supervisor .....                                                                      | 1                                                                                                                                                                                                                                                                                                                                                                                                                                                                                                                                                                                                                                                                                                                                                                                                                                                                                                                                                                                                                                                                                                                                                                                                                                                                                                                                                          |                         |   |                                        |   |                            |   |                          |   |                       |   |                    |   |                    |   |                  |   |               |   |                        |    |                     |    |           |    |               |    |                      |    |                |    |                       |    |                  |    |
| Other household or family member .....                                                       | 2                                                                                                                                                                                                                                                                                                                                                                                                                                                                                                                                                                                                                                                                                                                                                                                                                                                                                                                                                                                                                                                                                                                                                                                                                                                                                                                                                          |                         |   |                                        |   |                            |   |                          |   |                       |   |                    |   |                    |   |                  |   |               |   |                        |    |                     |    |           |    |               |    |                      |    |                |    |                       |    |                  |    |
| Medical practitioner .....                                                                   | 3                                                                                                                                                                                                                                                                                                                                                                                                                                                                                                                                                                                                                                                                                                                                                                                                                                                                                                                                                                                                                                                                                                                                                                                                                                                                                                                                                          |                         |   |                                        |   |                            |   |                          |   |                       |   |                    |   |                    |   |                  |   |               |   |                        |    |                     |    |           |    |               |    |                      |    |                |    |                       |    |                  |    |
| Government officer .....                                                                     | 4                                                                                                                                                                                                                                                                                                                                                                                                                                                                                                                                                                                                                                                                                                                                                                                                                                                                                                                                                                                                                                                                                                                                                                                                                                                                                                                                                          |                         |   |                                        |   |                            |   |                          |   |                       |   |                    |   |                    |   |                  |   |               |   |                        |    |                     |    |           |    |               |    |                      |    |                |    |                       |    |                  |    |
| Other (specify) .....                                                                        | 5                                                                                                                                                                                                                                                                                                                                                                                                                                                                                                                                                                                                                                                                                                                                                                                                                                                                                                                                                                                                                                                                                                                                                                                                                                                                                                                                                          |                         |   |                                        |   |                            |   |                          |   |                       |   |                    |   |                    |   |                  |   |               |   |                        |    |                     |    |           |    |               |    |                      |    |                |    |                       |    |                  |    |
| No one .....                                                                                 | 0                                                                                                                                                                                                                                                                                                                                                                                                                                                                                                                                                                                                                                                                                                                                                                                                                                                                                                                                                                                                                                                                                                                                                                                                                                                                                                                                                          |                         |   |                                        |   |                            |   |                          |   |                       |   |                    |   |                    |   |                  |   |               |   |                        |    |                     |    |           |    |               |    |                      |    |                |    |                       |    |                  |    |
| xiv. What is your evaluation of the accuracy and trustworthiness of the informant's answers? | <table style="width: 100%; border-collapse: collapse;"> <tr><td>Very good .....</td><td style="text-align: right;">1</td></tr> <tr><td>Satisfactory .....</td><td style="text-align: right;">2</td></tr> <tr><td>Doubtful .....</td><td style="text-align: right;">3</td></tr> <tr><td>Very low .....</td><td style="text-align: right;">4</td></tr> </table>                                                                                                                                                                                                                                                                                                                                                                                                                                                                                                                                                                                                                                                                                                                                                                                                                                                                                                                                                                                              | Very good .....         | 1 | Satisfactory .....                     | 2 | Doubtful .....             | 3 | Very low .....           | 4 |                       |   |                    |   |                    |   |                  |   |               |   |                        |    |                     |    |           |    |               |    |                      |    |                |    |                       |    |                  |    |
| Very good .....                                                                              | 1                                                                                                                                                                                                                                                                                                                                                                                                                                                                                                                                                                                                                                                                                                                                                                                                                                                                                                                                                                                                                                                                                                                                                                                                                                                                                                                                                          |                         |   |                                        |   |                            |   |                          |   |                       |   |                    |   |                    |   |                  |   |               |   |                        |    |                     |    |           |    |               |    |                      |    |                |    |                       |    |                  |    |
| Satisfactory .....                                                                           | 2                                                                                                                                                                                                                                                                                                                                                                                                                                                                                                                                                                                                                                                                                                                                                                                                                                                                                                                                                                                                                                                                                                                                                                                                                                                                                                                                                          |                         |   |                                        |   |                            |   |                          |   |                       |   |                    |   |                    |   |                  |   |               |   |                        |    |                     |    |           |    |               |    |                      |    |                |    |                       |    |                  |    |
| Doubtful .....                                                                               | 3                                                                                                                                                                                                                                                                                                                                                                                                                                                                                                                                                                                                                                                                                                                                                                                                                                                                                                                                                                                                                                                                                                                                                                                                                                                                                                                                                          |                         |   |                                        |   |                            |   |                          |   |                       |   |                    |   |                    |   |                  |   |               |   |                        |    |                     |    |           |    |               |    |                      |    |                |    |                       |    |                  |    |
| Very low .....                                                                               | 4                                                                                                                                                                                                                                                                                                                                                                                                                                                                                                                                                                                                                                                                                                                                                                                                                                                                                                                                                                                                                                                                                                                                                                                                                                                                                                                                                          |                         |   |                                        |   |                            |   |                          |   |                       |   |                    |   |                    |   |                  |   |               |   |                        |    |                     |    |           |    |               |    |                      |    |                |    |                       |    |                  |    |
| xv. Were there any unusual circumstances during the interview?                               | Please describe: _____                                                                                                                                                                                                                                                                                                                                                                                                                                                                                                                                                                                                                                                                                                                                                                                                                                                                                                                                                                                                                                                                                                                                                                                                                                                                                                                                     |                         |   |                                        |   |                            |   |                          |   |                       |   |                    |   |                    |   |                  |   |               |   |                        |    |                     |    |           |    |               |    |                      |    |                |    |                       |    |                  |    |

## INTERVIEW GUIDES – COGNITIVE INTERVIEWS FOR SURVEY TESTING

บทสัมภาษณ์ – การสัมภาษณ์กระบวนการคิดเพื่อการทดสอบแบบสอบถาม

บิกสัมภาษณ์ - การสัมภาษณ์กระบวนการคิดเพื่อการทดสอบแบบสอบถาม

### Objective วัตถุประสงค์ จุดประสงค์

To understand how survey participants understand the survey questions and arrive at their answers. เพื่อเรียนรู้ว่าผู้เข้าร่วมงานวิจัยมีการทำความเข้าใจคำถามที่ใช้ในแบบสอบถามอย่างไร และมีความคิดอย่างไรก่อนตัดสินใจตอบคำถามแต่ละข้อ เพื่อเรียนรู้ว่าผู้เข้าร่วมงานวิจัยมีความเข้าใจคำถามที่ใช้ในแบบสอบถามแบบใด และมีความคิดแบบใดก่อนตัดสินใจตอบคำถามแต่ละข้อ

### Introduction บทนำ บิกสัมภาษณ์

<Obtaining verbal informed consent in accordance with Oral Consent Script> <ดำเนินการขอคำยินยอมโดยใช้ข้อความสำหรับอธิบายงานวิจัยและขอคำยินยอมเข้าร่วมการวิจัยด้วยวาจา> <ดำเนินการขอคำยินยอมโดยใช้ข้อความสำหรับอธิบายวัตถุประสงค์และขอคำยินยอมเข้าร่วมงานวิจัยด้วยวาจา>

*Thank you for agreeing to participate in this study. ขอขอบคุณท่านสำหรับการตกลงเข้าร่วมการวิจัยครั้งนี้ ขอใจท่านสำหรับงานวิจัยที่เข้าร่วมงานวิจัยในครั้งนี้*

### Part I – About Yourself ส่วนที่ 1 – เกี่ยวกับตัวท่าน ส่วนที่ 1 - คุยกับตัวท่าน

*Let us start with a few questions about yourself. เราจะเริ่มโดยถามคำถามเกี่ยวกับข้อมูลส่วนตัวของท่าน เราจะไม่ถามคำถามที่เกี่ยวกับคุณลักษณะส่วนตัวของคุณ*

Guiding question: Who is my informant? คำถามนำ: ผู้ให้สัมภาษณ์คือใคร คำถามนำ: ผู้ใช้สัมภาษณ์แบบใด

1. How old are you? อายุของท่าน อายุเท่าไร
2. What is your level of education? การศึกษาสูงสุดของท่าน การศึกษาสูงสุดของท่าน
3. What is your ethnicity and nationality? เชื้อชาติ และ สัญชาติของท่าน เชื้อชาติและสัญชาติของท่าน

### Part II – Practicing the “Think Aloud” Technique ส่วนที่ 2 – เทคนิคการคิดออกเสียง (การบรรยายกระบวนการคิด) ส่วนที่ 2 - ฝึกปฏิบัติ

*Thank you. As we are trying to improve our survey, you can help us develop the questionnaire by participating in this interview. I would like to ask you to describe your thoughts as you think about the question and the answer as though you are talking to yourself. For example, what do you think as you receive the question? What does the question make you think of? In what way do you want answer to question? How do you arrive at your answer? Let me give you an example so you understand this type of interview better.*

*Let's say I was asked a question about “What do you see when you go from your home to the nearest temple?” If I was thinking out loud, I would say “[interviewer describing their own village].” So you can see how it works, though that was only one of many ways. The important thing is that there are no right or wrong answers. What really matters is your view and thought process. And this is what I would like you to share with me. So now it is your turn to practice.*

ขอบคุณครับ/ค่ะ เนื่องจากเรากำลังอยู่ในช่วงปรับปรุงแบบสอบถาม ท่านสามารถช่วยเราพัฒนาแบบสอบถามนี้ได้โดยการเข้าร่วมการสัมภาษณ์นี้ ซึ่งเราจะขอให้ท่านบรรยายความคิดของท่านในขณะที่ท่านพิจารณาคำถามและคำตอบเสมือนกับท่านกำลังคุยกับตนเอง เช่น ท่านคิดอย่างไรเมื่อท่านได้รับคำถาม คำถามทำให้ท่านนึกถึงอะไรบ้าง ท่านต้องการตอบคำถามเหล่านี้ได้อย่างไร ท่านได้คำตอบมาได้อย่างไร เราจะยกตัวอย่างให้ท่านหนึ่งตัวอย่างเพื่อให้ท่านสามารถเข้าใจการสัมภาษณ์ในลักษณะนี้มากขึ้น

ยกตัวอย่าง ถ้าเราต้องตอบคำถามที่ว่า “ท่านมองเห็นอะไรบ้างหากท่านเดินทางจากบ้านไปวัดที่ใกล้ที่สุด” และเราต้องบรรยายความคิดของเราให้ท่านฟัง เราจะพูดว่า “ผู้สัมภาษณ์บรรยายการเดินทางในหมู่บ้านของตนเอง” ซึ่งเป็นเพียงหนึ่งในหลากหลายวิธีที่ท่านสามารถใช้ได้ สิ่งที่สำคัญที่สุดเกี่ยวกับการคิดออกเสียงของท่านคือคำตอบของท่านจะไม่ถูกตัดสินว่าถูกหรือผิด เพราะสิ่งที่เราต้องการเรียนรู้มากที่สุดคือมุมมองและวิธีการคิดของท่าน และนั่นคือสิ่งที่เราอยากให้คุณแบ่งปันกับเรา ดังนั้นเราจึงขอให้ท่านลองคิดออกเสียงกับเราในคำถามต่อไปนี้











BMJ Open  
ANTIBIOTICS AND ACTIVITY SPACES

|    |                   |                          |                   |     |     |                                                                                                  |           |         |                                                                                                             |                   |
|----|-------------------|--------------------------|-------------------|-----|-----|--------------------------------------------------------------------------------------------------|-----------|---------|-------------------------------------------------------------------------------------------------------------|-------------------|
| 1  |                   |                          |                   |     |     | Less often or never <small>ไม่ค่อยบ่อย</small><br>หรือไม่เคยเลย <small>ไม่ค่อยเลย</small> .....0 |           |         | Emotional support/reassure <small>ให้กำลังใจ ให้ความมั่นใจ ใช้ท่า</small><br>ล้างใจ ใช้ความชื่นใจ .....7    |                   |
| 2  |                   |                          |                   |     |     |                                                                                                  |           |         | Provide help during illness <small>ให้ความช่วยเหลือระหว่างการป่วย</small><br>ใช้ความช่วยเหลือตอนป่วย .....8 |                   |
| 3  |                   |                          |                   |     |     |                                                                                                  |           |         | Other (specify) <small>อื่นๆ (ไประบุ) อื่นๆ (ระบุนอก)</small> ____ .9                                       |                   |
| 4  | Contact 2         | Name <small>ชื่อ</small> | 1 2 3 4 5 6 7 8 9 | 1 2 | 1 2 | Name <small>ชื่อ</small>                                                                         | 0 1 2 3 4 | 1 2 3 4 | 0 1 2 3 4 5                                                                                                 | 1 2 3 4 5 6 7 8 9 |
| 5  | คนที่ 2           | ชื่อ                     |                   |     |     | ชื่อ                                                                                             |           |         |                                                                                                             |                   |
| 6  | คนที่ 2           | ชื่อ                     |                   |     |     | ชื่อ                                                                                             |           |         |                                                                                                             |                   |
| 7  | [continue         |                          |                   |     |     |                                                                                                  |           |         |                                                                                                             |                   |
| 8  | until Contact     |                          |                   |     |     |                                                                                                  |           |         |                                                                                                             |                   |
| 9  | x                 |                          |                   |     |     |                                                                                                  |           |         |                                                                                                             |                   |
| 10 | maximum 10        |                          |                   |     |     |                                                                                                  |           |         |                                                                                                             |                   |
| 11 | contacts]         |                          |                   |     |     |                                                                                                  |           |         |                                                                                                             |                   |
| 12 | [ x x x x x x x x |                          |                   |     |     |                                                                                                  |           |         |                                                                                                             |                   |
| 13 | x x x x x x x x   |                          |                   |     |     |                                                                                                  |           |         |                                                                                                             |                   |
| 14 | x x x x n x       | Name <small>ชื่อ</small> | 1 2 3 4 5 6 7 8 9 | 1 2 | 1 2 | Name <small>ชื่อ</small>                                                                         | 0 1 2 3 4 | 1 2 3 4 | 0 1 2 3 4 5                                                                                                 | 1 2 3 4 5 6 7 8 9 |
| 15 | x x x x 10 x      | ชื่อ                     |                   |     |     | ชื่อ                                                                                             |           |         |                                                                                                             |                   |
| 16 | [บันทึกนามคนที่   |                          |                   |     |     |                                                                                                  |           |         |                                                                                                             |                   |
| 17 | ที่มีความ         |                          |                   |     |     |                                                                                                  |           |         |                                                                                                             |                   |
| 18 | กังวลอย่างสุด     |                          |                   |     |     |                                                                                                  |           |         |                                                                                                             |                   |
| 19 | วาวจากงานเจ็บ     |                          |                   |     |     |                                                                                                  |           |         |                                                                                                             |                   |
| 20 | ป่วยทุกคืน ปี     |                          |                   |     |     |                                                                                                  |           |         |                                                                                                             |                   |
| 21 | ป่วยกว่า 10       |                          |                   |     |     |                                                                                                  |           |         |                                                                                                             |                   |
| 22 | คืน]              |                          |                   |     |     |                                                                                                  |           |         |                                                                                                             |                   |

- a. How did you go about answering these questions? *ท่านมีวิธีการตอบคำถามเหล่านี้ได้อย่างไร ท่านมีวิธีการตอบคำถามเหล่านี้*  
*แนวใด*
- b. What did you imagine while answering the question, e.g. the “interaction setting” that you had in mind?  
*ในขณะที่ท่านตอบคำถามเหล่านี้ท่านมีภาพอะไรอยู่ในใจ เช่น ลักษณะของสถานที่ ฯลฯ ในขณะที่ท่านตอบคำถามเหล่านี้ท่านมีภาพอย่างไร*  
*เห็น ลักษณะของสถานที่ และอื่นๆ*
- c. What time period were you thinking of? *จากคำตอบที่ท่านให้เรารู้เกี่ยวกับบุคคลที่ท่านมีปฏิสัมพันธ์ด้วย ท่านนึกถึงช่วงเวลาใด*  
*จากคำตอบ*  
*ที่ท่านใช้เรารู้เกี่ยวกับบุคคลที่ท่านมีปฏิสัมพันธ์ด้วย ท่านนึกถึงช่วงเวลาใด*
- d. How did you come up with the order of people? Why did you think of these people first rather than others?  
*ท่านมีการเรียงลำดับบุคคลเหล่านี้ได้อย่างไร เพราะเหตุใดท่านจึงบอกชื่อบุคคลเหล่านี้กับเราเป็นลำดับแรกๆ หากเปรียบเทียบบุคคลอื่น ท่านมีการลืมนำ*  
*บุคคลเหล่านี้ไปหรือไม่*
- e. What is the best way we can find these people from your interaction circle? How would you describe where they live?  
*หากเราต้องการพูดคุยกับบุคคลที่ท่านกล่าวถึงเหล่านี้ เราสามารถพบพวกเขาได้อย่างไร ท่านจะสามารถอธิบายที่อยู่ของพวกเขาได้*  
*อย่างไร ถ้าเราต้องการพบกับบุคคลที่ท่านกล่าวถึงเหล่านี้ เราสามารถพบพวกเขาได้อย่างไร ท่านสามารถอธิบายที่อยู่ของพวกเขา*  
*ได้อย่างไร*

**Part IV – Health-Related Survey Questions ส่วนที่ 4 – คำถามเกี่ยวกับสุขภาพ ส่วนที่ 4 - คำถามเกี่ยวกับสุขภาพ**

*Thank you for this. Now we come to a part where I will ask you some questions about health and health providers around here. ขอบขอบคุณค่ะ คำถามช่วงต่อไปจะเป็นเรื่องสุขภาพและสถานบริการสุขภาพในพื้นที่นี้ ขอใจ คำถามต่อไปนี้จะเป็นคำถามเกี่ยวกับสุขภาพ และสถานบริการสุขภาพในพื้นที่นี้*

7. For the following question, can you please “think out loud” about your answers? *เราขอให้คุณ “คิดออกเสียง” ในระหว่างที่*  
*ท่านตอบคำถามต่อไปนี้ เราขอให้คุณ คิดออกเสียง*

|                                                                                                                                                                                                                                                                                                                                                                                                                                                                                                          |                                                                                                                             |                                                                                                  |
|----------------------------------------------------------------------------------------------------------------------------------------------------------------------------------------------------------------------------------------------------------------------------------------------------------------------------------------------------------------------------------------------------------------------------------------------------------------------------------------------------------|-----------------------------------------------------------------------------------------------------------------------------|--------------------------------------------------------------------------------------------------|
| I would now like to ask you about the sources of health advice and medicine or other treatment that are available to you. Please think about all the places where you can go to get advice, treatment, or drugs if you (or your children) are sick. <i>คำถามต่อไปเป็นคำถามเกี่ยวกับสถานที่หรือบุคคลที่ท่านสามารถรับคำปรึกษา รักษารักษา หรือ รับการรักษาอื่นๆ ได้ กรุณานึกถึงสถานที่ทุกแห่งหรือคนทุกคนที่ท่านสามารถรับคำปรึกษา รับการรักษา หรือรักษา หากท่านหรือเด็กในปกครองของท่านป่วย ถ้าท่านเข้าไป</i> | Drug dispensary, other local store selling medicine <i>ร้านขายของชำหรือร้านทั่วไปที่มีการจำหน่ายยา ร้านทั่วไปที่มีขายยา</i> | Medical treatment <i>เพื่อการรักษา</i> <i>สำหรับผู้ป่วย...</i> 1                                 |
|                                                                                                                                                                                                                                                                                                                                                                                                                                                                                                          |                                                                                                                             | Medical advice <i>เพื่อคำแนะนำในการรักษา</i> <i>สำหรับคำแนะนำในการป่วย...</i> 2                  |
|                                                                                                                                                                                                                                                                                                                                                                                                                                                                                                          |                                                                                                                             | Access to medicine <i>เพื่อซื้อ/รับยา</i> <i>สำหรับซื้อ/รับยา...</i> 3                           |
|                                                                                                                                                                                                                                                                                                                                                                                                                                                                                                          |                                                                                                                             | Don't consider this provider <i>ไม่มีการให้บริการประเภทนี้</i> <i>ไม่มีงานใช้บ่งชี้ภาวะ...</i> 0 |
| Which of the following options do you consider for medical treatment, advice, or to get medicine? <i>ท่านเคยได้รับคำปรึกษา รักษารักษา หรือ รับ</i>                                                                                                                                                                                                                                                                                                                                                       | Traditional healer <i>หมอชาวบ้าน ชิมชากบ้าน</i>                                                                             | Medical treatment <i>เพื่อการรักษา</i> <i>สำหรับผู้ป่วย...</i> 1                                 |
|                                                                                                                                                                                                                                                                                                                                                                                                                                                                                                          |                                                                                                                             | Medical advice <i>เพื่อคำแนะนำในการรักษา</i> <i>สำหรับคำแนะนำในการป่วย...</i> 2                  |
|                                                                                                                                                                                                                                                                                                                                                                                                                                                                                                          |                                                                                                                             | Access to medicine <i>เพื่อซื้อ/รับยา</i> <i>สำหรับซื้อ/รับยา...</i> 3                           |
|                                                                                                                                                                                                                                                                                                                                                                                                                                                                                                          |                                                                                                                             | Don't consider this provider <i>ไม่มีการให้บริการประเภทนี้</i> <i>ไม่มีงานใช้บ่งชี้ภาวะ...</i> 0 |
| Which of the following options do you consider for medical treatment, advice, or to get medicine? <i>ท่านเคยได้รับคำปรึกษา รักษารักษา หรือ รับ</i>                                                                                                                                                                                                                                                                                                                                                       | Pharmacist <i>เภสัชกร ผู้ขายยา</i>                                                                                          | Medical treatment <i>เพื่อการรักษา</i> <i>สำหรับผู้ป่วย...</i> 1                                 |
|                                                                                                                                                                                                                                                                                                                                                                                                                                                                                                          |                                                                                                                             | Medical advice <i>เพื่อคำแนะนำในการรักษา</i> <i>สำหรับคำแนะนำในการป่วย...</i> 2                  |
|                                                                                                                                                                                                                                                                                                                                                                                                                                                                                                          |                                                                                                                             | Access to medicine <i>เพื่อซื้อ/รับยา</i> <i>สำหรับซื้อ/รับยา...</i> 3                           |
|                                                                                                                                                                                                                                                                                                                                                                                                                                                                                                          |                                                                                                                             | Don't consider this provider <i>ไม่มีการให้บริการประเภทนี้</i> <i>ไม่มีงานใช้บ่งชี้ภาวะ...</i> 0 |
| Which of the following options do you consider for medical treatment, advice, or to get medicine? <i>ท่านเคยได้รับคำปรึกษา รักษารักษา หรือ รับ</i>                                                                                                                                                                                                                                                                                                                                                       | Private clinic <i>คลินิกเอกชน คลินิกเอกชน</i>                                                                               | Medical treatment <i>เพื่อการรักษา</i> <i>สำหรับผู้ป่วย...</i> 1                                 |
|                                                                                                                                                                                                                                                                                                                                                                                                                                                                                                          |                                                                                                                             | Medical advice <i>เพื่อคำแนะนำในการรักษา</i> <i>สำหรับคำแนะนำในการป่วย...</i> 2                  |
|                                                                                                                                                                                                                                                                                                                                                                                                                                                                                                          |                                                                                                                             | Access to medicine <i>เพื่อซื้อ/รับยา</i> <i>สำหรับซื้อ/รับยา...</i> 3                           |
|                                                                                                                                                                                                                                                                                                                                                                                                                                                                                                          |                                                                                                                             | Don't consider this provider <i>ไม่มีการให้บริการประเภทนี้</i> <i>ไม่มีงานใช้บ่งชี้ภาวะ...</i> 0 |



OxTREC reference: 528-17

ANTIBIOTICS AND ACTIVITY SPACES

1  
2  
3  
4  
5  
6  
7  
8  
9  
10  
11  
12  
13  
14  
15  
16  
17  
18  
19  
20  
21  
22  
23  
24  
25  
26  
27  
28  
29  
30  
31  
32  
33  
34  
35  
36  
37  
38  
39  
40  
41  
42  
43  
44  
45  
46  
47  
48  
49  
50  
51  
52  
53  
54  
55  
56  
57  
58  
59  
60

|                                                                                                                                                                           |  |
|---------------------------------------------------------------------------------------------------------------------------------------------------------------------------|--|
| <p>Can you please describe the symptoms or problem in your own words? กรุณาอธิบายอาการหรือปัญหาในรูปแบบที่ท่านเข้าใจ ภาะลุนาอะหิบาย อากาานຫຼືບັນຫາໃນແບບທີ່ທ່ານເຂົ້າໃຈ</p> |  |
|---------------------------------------------------------------------------------------------------------------------------------------------------------------------------|--|

For peer review only















|                                                                                                                                                                   |                                                                                                                                                                                                |               |                   |                                                                                                                                                                                                                                                                                                                                                                                                                                                                                                                                                                                                                                                                                                                                                                                                                                                                                                                                                                                                               |
|-------------------------------------------------------------------------------------------------------------------------------------------------------------------|------------------------------------------------------------------------------------------------------------------------------------------------------------------------------------------------|---------------|-------------------|---------------------------------------------------------------------------------------------------------------------------------------------------------------------------------------------------------------------------------------------------------------------------------------------------------------------------------------------------------------------------------------------------------------------------------------------------------------------------------------------------------------------------------------------------------------------------------------------------------------------------------------------------------------------------------------------------------------------------------------------------------------------------------------------------------------------------------------------------------------------------------------------------------------------------------------------------------------------------------------------------------------|
| 1<br>2<br>3<br>4<br>5<br>6<br>7<br>8<br>9<br>10<br>11<br>12<br>13<br>14<br>15<br>16<br>17<br>18<br>19<br>20<br>21<br>22<br>23<br>24<br>25<br>26<br>27<br>28<br>29 | Contact 1 คนที่ 1 ถิ่นที่ 1                                                                                                                                                                    |               |                   | Providing healthcare/attending ให้การรักษา/การดูแล<br>ใช้บริการเบี่ยงเบน..... 11<br>Providing advice ให้คำปรึกษา ใช้คำปรึกษา ..... 12<br>Providing medicine ให้ยา ใช้ยา ..... 13<br>Lending/granting money ให้หรือให้ยืมเงิน<br>ใช้ยืมยืมเงิน..... 21<br>Transportation/Lending vehicle อำนวยความสะดวกในด้านการ<br>เดินทาง/ให้ยืมพาหนะ สร้างความสะดวกด้านการเดินทาง/ใช้ยืม<br>ยานพาหนะ ..... 22<br>Contacting family/friends ติดต่อครอบครัว/เพื่อน ติดต่<br>อดปลิว/หมู..... 23<br>Providing food สนับสนุนอาหาร<br>สะทั้นบสะทั้นบอาหาร ..... 31<br>Helping with children/housework ช่วยดูแลลูกหลาน/งานบ้าน<br>ช่วยเบี่ยงเบนลูกหลานที่เด็กน้อย/วกรบ้าน ..... 32<br>Helping with jobs/agriculture work (feeding<br>animals/tending crops/covering shifts, etc.) ช่วยเหลือ<br>เกี่ยวกับอาชีพ/การเกษตร (ช่วยดูแลสัตว์เลี้ยง/งานเพาะปลูก/ทำงานแทน) ช่วย<br>ไร้วกร/งานกะสิกร (ช่วยเบี่ยงเบนสัตว์เลี้ยง/ไร้วกรไร้วกร/ไร้วกร/ไร้วกร/ไร้วกร)..... 33<br>Other (specify) อื่นๆ (โปรดระบุ) อื่นๆ (ระบุรายละเอียด) _ .. 99 |
| 30<br>31                                                                                                                                                          | Contact 2 คนที่ 2 ถิ่นที่ 2                                                                                                                                                                    | Name ชื่อ ๑๑๑ | 1 2 3 4 5 6 7 8 9 | 11 12 13 21 22 23 31 32 33 99                                                                                                                                                                                                                                                                                                                                                                                                                                                                                                                                                                                                                                                                                                                                                                                                                                                                                                                                                                                 |
| 32<br>33<br>34<br>35<br>36<br>37                                                                                                                                  | [continue until Contact x ๕<br>maximum 10 contacts] [ ๕ ๕ ๕ ๕ ๕ ๕ ๕ ๕ ๕ ๕ ๕ ๕ ๕ ๕ ๕ ๕ ๕ ๕ ๕ ๕ ๕ ๕ ]<br>[บันทึกทุกถิ่นที่มีเวลาทำเรื่องขอช่วยเหลือ<br>อาหารเจ็บป่วยฉุกเฉิน ไม่เกินกว่า 10 ถิ่น] | Name ชื่อ ๑๑๑ | 1 2 3 4 5 6 7 8 9 | 11 12 13 21 22 23 31 32 33 99                                                                                                                                                                                                                                                                                                                                                                                                                                                                                                                                                                                                                                                                                                                                                                                                                                                                                                                                                                                 |

- a. Do you think these questions are too hard? ท่านรู้สึกว่าการถามเหล่านี้ยากเกินไปหรือไม่ ท่านรู้สึกว่าการถามเหล่านี้ยากเกินไปหรือไม่
  - b. Did you find it tedious to go through the illness in such detail? เป็นเรื่องน่าเบื่อหรือไม่ที่ท่านต้องอธิบายอาการป่วยของท่านโดยละเอียด เป็นเรื่องน่าเบื่อหรือไม่ที่ท่านต้องอธิบายอาการป่วยของท่านโดยละเอียด
  - c. How well do you remember the medicines that you used during that illness? ท่านสามารถจดจำยาที่ท่านใช้ระหว่างการรักษาได้แค่ไหน ท่านสามารถจำยาที่ท่านใช้ระหว่างการรักษาได้แค่ไหน
  - d. Did you think about anything in particular to help you recall the medicines? ที่ท่านนึกถึงอะไรเพื่อเป็นความช่วยเหลือในการทวนความจำเกี่ยวกับยาเหล่านี้ ท่านนึกถึงอะไรเพื่อเป็นความช่วยเหลือในการทวนความจำเกี่ยวกับยาเหล่านี้
  - e. How do you indicate that the symptoms are cured? Would you stop taking medicines then? What if the doctor's instruction is to complete the dose? ท่านสามารถบอกได้อย่างไรว่าการป่วยของท่านหายแล้ว หากอาการป่วยของท่านหายท่านจะหยุดรับประทานยาหรือไม่ หากแพทย์แนะนำให้ท่านใช้ยาจนหมดแต่อาการของท่านหายแล้วท่านจะปฏิบัติตามคำสั่งแพทย์หรือไม่ ท่านสามารถบอกได้แน่นอนว่าอาการเจ็บป่วยของท่านดีแล้ว ถ้าอาการเจ็บป่วยของท่านดี ท่านจะหยุดกินยาทันทีหรือไม่ ถ้าเช่นนั้นแนะนำให้ท่านใช้ยาจนหมดแต่อาการของท่านดีแล้วท่านจะปฏิบัติตามคำสั่งแพทย์หรือไม่
10. The next question deals with medicine. Could you please tell me what is going through your mind while you are answering the question? คำถามต่อไปจะเป็นคำถามเกี่ยวกับยา เราขอให้คุณบอกเราว่าท่านนึกถึงอะไรระหว่างการตอบคำถามเหล่านี้ ถ้าเป็นไปได้จะเป็นคำถามเกี่ยวกับยา เราขอให้คุณบอกเราว่าท่านนึกถึงอะไรระหว่างการตอบคำถามเหล่านี้

I would now like to ask you your opinion about medicine. There are no right or wrong answers, I only want to understand what you think. เราอยากทราบความคิดเห็นของท่านเกี่ยวกับการใช้ยา คำถามเหล่านี้ไม่มีคำตอบที่ถูกต้องหรือผิด เราเพียงต้องการรู้ว่าท่านคิดอย่างไร เรียอยากรู้ความถี่เห็นของท่านที่เกี่ยวกับงานใช้ยา คำถามเหล่านี้มีคำตอบที่ถูกต้องหรือไม่ เรียหวังต่อจางานรู้จางานที่ถกเถียงกัน

Consider the following medicines they are commonly referred to as antibiotics.

พิจารณาหาเหล่านี้ซึ่งเป็นยาที่รู้จักกันในนาม "ยาปฏิชีวนะ" มีจาละนามยาเหล่านี้ที่รู้จักกันในามม ยาต้านเชื้อ

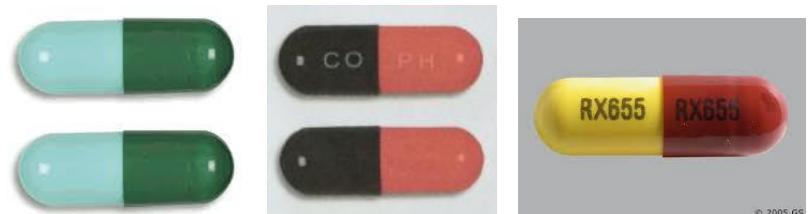

|                                                                                                                                                                                                                                                                                                                                                                                |                                                                                                                                                          |
|--------------------------------------------------------------------------------------------------------------------------------------------------------------------------------------------------------------------------------------------------------------------------------------------------------------------------------------------------------------------------------|----------------------------------------------------------------------------------------------------------------------------------------------------------|
| <p>Would you buy this medicine if you think you need it but cannot get it prescribed by a doctor? หากท่านไม่ได้รับยาหลังจากเข้าพบแพทย์แม้ท่านรู้สึกว่าท่านควรรับประทานยา ท่านจะซื้อยานี้จากแหล่งอื่นหรือไม่ ถ้าท่านซื้อได้ รับประทานยาหลังจากเข้าพบแพทย์ ท่านจะรู้สึกว่าการรับประทานยานี้ ท่านจะซื้อยาอื่นจากแพทย์อื่นหรือไม่</p>                                              | <p>Yes ใช่ ..... 1<br/>                 No ไม่ใช่ ..... 2<br/>                 I don't know ไม่ทราบ ..... 99</p>                                         |
| <p>Would you try other remedies such as sponge bath, herbs, or paracetamol before using this medicine? ท่านจะลองใช้วิธีการรักษาอื่น เช่น เช็ดตัว สมุนไพร หรือ พาราเซตามอลก่อนใช้นี้หรือไม่ ท่านจะพยายามอื่นโดยวิธีอื่นอื่น เช่น เช็ดตัว ยารักษาไม่ ชีพาราศาเดตามอนก่อนใช้ยาอื่น</p>                                                                                            | <p>Yes ใช่ ..... 1<br/>                 No ไม่ใช่ ..... 2<br/>                 I don't know ไม่ทราบ ..... 99</p>                                         |
| <p>If you had to take this medicine and your symptoms disappear after 2 days, would you finish a complete course of 7 days or stop taking it immediately? หากท่านจำเป็นต้องรับประทานยา และอาการของท่านดีขึ้นภายใน 2 วัน ท่านจะรับประทานยาต่อจนครบ 7 วัน หรือหยุดรับประทานทันที ถ้าหากท่านมีความจำเป็นต่อจางานอื่น ๆ ท่านจะรับประทานยาต่อจนครบ 7 วัน หรือหยุดรับประทานทันที</p> | <p>Finish course รับประทานต่อจนหมด ..... 1<br/>                 Stop taking หยุดรับประทาน ..... 2<br/>                 I don't know ไม่ทราบ ..... 99</p> |
| <p>Do you think the way other people use this medicine affects its efficacy on you? ท่านคิดว่า การใช้ยาของคนอื่นมีผลกระทบต่อผลของการใช้ยาของท่านหรือไม่ ท่านคิดว่างานใช้ยาอื่น ๆ มีผลกับประสิทธิภาพของงานใช้ยาอื่น ๆ หรือไม่</p>                                                                                                                                               | <p>Yes ใช่ ..... 1<br/>                 No ไม่ใช่ ..... 2<br/>                 I don't know ไม่ทราบ ..... 99</p>                                         |

- As I have said before, these survey questions are not intended to measure your knowledge. Did you feel tested or pressured being asked these questions at all? เราได้บอกท่านข้างต้นเกี่ยวกับคำถามเหล่านี้ที่ไม่ได้ถูกออกแบบเพื่อเป็นข้อสอบวัดความรู้ ท่านรู้สึกถูกทดสอบหรือกดดันในการตอบคำถามเหล่านี้หรือไม่ เราได้บอกท่านข้างต้นเกี่ยวกับคำถามเหล่านี้ที่บ่งบอกถึงความรู้สึกของท่านเกี่ยวกับยา
- Have you heard of antibiotics? ท่านเคยได้ยินเกี่ยวกับยาปฏิชีวนะหรือไม่ ท่านเคยได้ยินเกี่ยวกับยาต้านเชื้อหรือไม่
- Other than the term "antibiotics," how do you normally call these medicines? นอกจากคำว่า "ยาปฏิชีวนะ" ท่านเรียกยาชนิดนี้ว่าอะไรอีกบ้าง นอกจากคำว่า ยาต้านเชื้อ ท่านเรียกยาชนิดนี้ว่าอะไรอีกบ้าง
- Do you think other villagers will associate the pictures with other types of medicine? ท่านคิดว่าชาวบ้านคนอื่น ๆ จะนึกถึงยาชนิดอื่นหรือไม่เมื่อเห็นภาพเหล่านี้ ท่านคิดว่าชาวบ้านคนอื่น ๆ จะนึกถึงยาชนิดอื่นหรือไม่เมื่อเห็นภาพเหล่านี้

**Part V – Household-Related Survey Questions ส่วนที่ 5 – คำถามเกี่ยวกับครัวเรือน ส่วนที่ 5 - คำถามเกี่ยวกับครัวเรือน**

*Thank you. We now come to the last part. ขอบคุณครับ/ค่ะ ส่วนต่อไปเป็นส่วนสุดท้ายของการสัมภาษณ์ ขอบใจ ส่วนนี้เป็นส่วนสุดท้ายของงานสำเนา*

11. The following questions relate to your household. คำถามต่อไปนี้เป็นคำถามเกี่ยวกับครัวเรือนของท่าน คำถามต่อไปนี้จะเป็นคำถามเกี่ยวกับครัวเรือนของท่าน

| I will now ask you for some items in your household. Please tell me <input type="checkbox"/> ต่อไปเราจะถามท่านเกี่ยวกับสิ่งของที่ท่านครอบครองในครัวเรือนต่อไปนี้ที่จะถามเกี่ยวกับสิ่งของที่มีอยู่ในครัวเรือนของท่าน                                                                              |  | Number of items in household <i>นวนของสิ่งของที่มีภายในครัวเรือนจำนวนของสิ่งของที่มีภายในครัวเรือน:</i> |
|--------------------------------------------------------------------------------------------------------------------------------------------------------------------------------------------------------------------------------------------------------------------------------------------------|--|---------------------------------------------------------------------------------------------------------|
| Have you got a <i>functioning</i> radio in your household? If so, how many? <i>ท่านมีวิทยุที่ใช้งานได้ใช้งานในครัวเรือนของท่านหรือไม่ ถ้ามี ที่เครื่อง</i> <i>ท่านมีวิทยุที่ใช้งานได้ใช้งานในครัวเรือนของท่านหรือไม่ ถ้ามี</i> จักอัน                                                            |  | _____                                                                                                   |
| Have you got a <i>functioning</i> TV in your household? If so, how many? <i>ท่านมีโทรทัศน์ที่ใช้งานได้ใช้งานในครัวเรือนของท่านหรือไม่ ถ้ามี ที่เครื่อง</i> <i>ท่านมีโทรทัศน์ที่ใช้งานได้ใช้งานในครัวเรือนของท่านหรือไม่ ถ้ามี</i> จักอัน                                                         |  | _____                                                                                                   |
| Have you got a <i>functioning</i> rice cooker in your household? If so, how many? <i>ท่านมีหม้อหุงข้าวที่ใช้งานได้ใช้งานในครัวเรือนของท่านหรือไม่ ถ้ามี ที่เครื่อง</i> <i>ท่านมีหม้อหุงข้าวที่ใช้งานได้ใช้งานในครัวเรือนของท่านหรือไม่ ถ้ามี</i> จักอัน                                          |  | _____                                                                                                   |
| Have you got a <i>functioning</i> landline telephone in your household? If so, how many? <i>ท่านมีโทรศัพท์บ้านที่ใช้งานได้ใช้งานในครัวเรือนของท่านหรือไม่ ถ้ามี ที่เครื่อง</i> <i>ท่านมีโทรศัพท์บ้านที่ใช้งานได้ใช้งานในครัวเรือนของท่านหรือไม่ ถ้ามี</i> จักอัน                                 |  | _____                                                                                                   |
| Have you got a <i>functioning</i> mobile phone in your household? If so, how many? <i>ท่านมีโทรศัพท์มือถือที่ใช้งานได้ใช้งานในครัวเรือนของท่านหรือไม่ ถ้ามี ที่เครื่อง</i> <i>ท่านมีโทรศัพท์มือถือที่ใช้งานได้ใช้งานในครัวเรือนของท่านหรือไม่ ถ้ามี</i> จักอัน                                   |  | _____                                                                                                   |
| Have you got a <i>functioning</i> computer in your household? If so, how many? <i>ท่านมีคอมพิวเตอร์ที่ใช้งานได้ใช้งานในครัวเรือนของท่านหรือไม่ ถ้ามี ที่เครื่อง</i> <i>ท่านมีคอมพิวเตอร์ที่ใช้งานได้ใช้งานในครัวเรือนของท่านหรือไม่ ถ้ามี</i> จักอัน                                             |  | _____                                                                                                   |
| Have you got a <i>functioning</i> bicycle in your household? If so, how many? <i>ท่านมีรถจักรยานที่ใช้งานได้ใช้งานในครัวเรือนของท่านหรือไม่ ถ้ามี ที่คัน</i> <i>ท่านมีรถจักรยานที่ใช้งานได้ใช้งานในครัวเรือนของท่านหรือไม่ ถ้ามี</i> จักอัน                                                      |  | _____                                                                                                   |
| Have you got a <i>functioning</i> scooter, motorcycle, or tricycle in your household? If so, how many? <i>ท่านมีจักรยานยนต์หรือรถสามล้อที่ใช้งานได้ใช้งานในครัวเรือนของท่านหรือไม่ ถ้ามี ที่คัน</i> <i>ท่านมีจักรยานยนต์หรือรถสามล้อที่ใช้งานได้ใช้งานในครัวเรือนของท่านหรือไม่ ถ้ามี</i> จักอัน |  | _____                                                                                                   |
| Have you got a <i>functioning</i> car or truck in your household? If so, how many? <i>ท่านมีรถยนต์ รถกระบะ หรือรถบรรทุกที่ใช้งานได้ใช้งานในครัวเรือนของท่านหรือไม่ ถ้ามี ที่คัน</i> <i>ท่านมีรถยนต์ รถกระบะ หรือรถบรรทุกที่ใช้งานได้ใช้งานในครัวเรือนของท่านหรือไม่ ถ้ามี</i> จักอัน             |  | _____                                                                                                   |
| Have you got a <i>functioning</i> tractor in your household? If so, how many? <i>ท่านมีรถแทรกเตอร์หรือรถไถที่ใช้งานได้ใช้งานในครัวเรือนของท่านหรือไม่ ถ้ามี ที่คัน</i> <i>ท่านมีรถแทรกเตอร์หรือรถไถที่ใช้งานได้ใช้งานในครัวเรือนของท่านหรือไม่ ถ้ามี</i> จักอัน                                  |  | _____                                                                                                   |
| Have you got a <i>functioning</i> refrigerator or freezer in your household? If so, how many? <i>ท่านมีตู้เย็นหรือตู้แช่แข็งที่ใช้งานได้ใช้งานในครัวเรือนของท่านหรือไม่ ถ้ามี ที่ตู้</i> <i>ท่านมีตู้เย็นหรือตู้แช่แข็งที่ใช้งานได้ใช้งานในครัวเรือนของท่านหรือไม่ ถ้ามี</i> จักอัน              |  | _____                                                                                                   |

- Do you feel comfortable (or uncomfortable) recalling these points for your household?  
ท่านรู้สึกสบายใจ (หรืออึดอัดใจ) ในการนึกถึงหัวข้อของเครื่องใช้เหล่านี้ในครัวเรือนของท่านหรือไม่ ท่านรู้สึกสบายใจ (หรืออึดอัดใจ) ในงานนึกถึงเรื่องใช้เหล่านี้ในครัวเรือนของท่านหรือไม่
- Are there some common household items that you normally see in your village?  
ข้าวของเครื่องใช้ที่เรากล่าวมาข้างต้นเป็นสิ่งที่คนในหมู่บ้านนี้ใช้กันทั่วไปหรือไม่ เรื่องใช้เหล่านี้เรากล่าวมาในขั้นต้นเป็นสิ่งที่คนในหมู่บ้านนี้ใช้กันทั่วไปหรือไม่
- How would you distinguish whether somebody in your village is wealthy or not?





| No                       | Topic                    | Item                                                                                                                                                                                                         | Check                               | Comment                                                                                                                                                 |
|--------------------------|--------------------------|--------------------------------------------------------------------------------------------------------------------------------------------------------------------------------------------------------------|-------------------------------------|---------------------------------------------------------------------------------------------------------------------------------------------------------|
| 1a                       | Title & Abstract         | (a) Indicate the study's design with a commonly used term in the title or the abstract                                                                                                                       | <input checked="" type="checkbox"/> | Page 1                                                                                                                                                  |
| 1b                       | Title & Abstract         | (b) Provide in the abstract an informative and balanced summary of what was done and what was found                                                                                                          | <input checked="" type="checkbox"/> | Pages 2-3                                                                                                                                               |
| <b>Introduction</b>      |                          |                                                                                                                                                                                                              |                                     |                                                                                                                                                         |
| 2                        | Background/rationale     | Explain the scientific background and rationale for the investigation being reported                                                                                                                         | <input checked="" type="checkbox"/> | See introduction, esp. page 4                                                                                                                           |
| 3                        | Objectives               | State specific objectives, including any prespecified hypotheses                                                                                                                                             | <input checked="" type="checkbox"/> | See introduction, page 4                                                                                                                                |
| <b>Methods</b>           |                          |                                                                                                                                                                                                              |                                     |                                                                                                                                                         |
| 4                        | Study design             | Present key elements of study design early in the paper                                                                                                                                                      | <input checked="" type="checkbox"/> | Research design at beginning of methods section, pages 5-6                                                                                              |
| 5                        | Setting                  | Describe the setting, locations, and relevant dates, including periods of recruitment, exposure, follow-up, and data collection                                                                              | <input checked="" type="checkbox"/> | See research design section, pages 5-6; exposure and follow-up not applicable                                                                           |
| 6                        | Participants             | Cross-sectional study—Give the eligibility criteria, and the sources and methods of selection of participants                                                                                                | <input checked="" type="checkbox"/> | See research design and study population sections, pages 5-6                                                                                            |
| 7                        | Variables                | Clearly define all outcomes, exposures, predictors, potential confounders, and effect modifiers. Give diagnostic criteria, if applicable                                                                     | <input checked="" type="checkbox"/> | Key outcomes described in data collection section, pages 7-8; All variables described in Appendix Table A2; diagnostic criteria not applicable          |
| 8                        | Data sources/measurement | For each variable of interest, give sources of data and details of methods of assessment (measurement). Describe comparability of assessment methods if there is more than one group                         | <input checked="" type="checkbox"/> | All variables described in Appendix Table A2, data collection and translation process for the two sites described in data collection section, page 7    |
| 9                        | Bias                     | Describe any efforts to address potential sources of bias                                                                                                                                                    | <input checked="" type="checkbox"/> | Recall biases mitigated through elicitation of behavioural sequences (pages 15-16)                                                                      |
| 10                       | Study size               | Explain how the study size was arrived at                                                                                                                                                                    | <input checked="" type="checkbox"/> | See research design section, pages 5-6                                                                                                                  |
| 11                       | Quantitative variables   | Explain how quantitative variables were handled in the analyses. If applicable, describe which groupings were chosen and why                                                                                 | <input checked="" type="checkbox"/> | All variables described in Appendix Table A2 (incl. variable construction)                                                                              |
| 12a                      | Statistical methods      | (a) Describe all statistical methods, including those used to control for confounding                                                                                                                        | <input checked="" type="checkbox"/> | Data analysis section, pages 8-9                                                                                                                        |
| 12b                      | Statistical methods      | (b) Describe any methods used to examine subgroups and interactions                                                                                                                                          | <input checked="" type="checkbox"/> | Data analysis section, pages 8-9                                                                                                                        |
| 12c                      | Statistical methods      | (c) Explain how missing data were addressed                                                                                                                                                                  | <input checked="" type="checkbox"/> | Not applicable (data complete; sub-group analysis of illness episodes indicated in data analysis section, page 9)                                       |
| 12d                      | Statistical methods      | Cross-sectional study—If applicable, describe analytical methods taking account of sampling strategy                                                                                                         | <input checked="" type="checkbox"/> | Page 8: SVY suite of commands in Stata 15                                                                                                               |
| 12e                      | Statistical methods      | Describe any sensitivity analyses                                                                                                                                                                            | <input checked="" type="checkbox"/> | Inclusion of "confirmed" and "potential" antibiotic use, data collection section, pages 7-8                                                             |
| <b>Results</b>           |                          |                                                                                                                                                                                                              |                                     |                                                                                                                                                         |
| 13a                      | Participants             | (a) Report numbers of individuals at each stage of study—eg numbers potentially eligible, examined for eligibility, confirmed eligible, included in the study, completing follow-up, and analysed            | <input checked="" type="checkbox"/> | See flow diagram of sampling strategy in Figure 1, page 6                                                                                               |
| 13b                      | Participants             | (b) Give reasons for non-participation at each stage                                                                                                                                                         | <input checked="" type="checkbox"/> | Research design section: Non-availability of random selection, information on random replacement procedures in pages 5-6 and selection data in Figure 1 |
| 13c                      | Participants             | (c) Consider use of a flow diagram                                                                                                                                                                           | <input checked="" type="checkbox"/> | See flow diagram of sampling strategy in Figure 1, page 6                                                                                               |
| 14a                      | Descriptive data         | (a) Give characteristics of study participants (eg demographic, clinical, social) and information on exposures and potential confounders                                                                     | <input checked="" type="checkbox"/> | Results section, Table 1, page 11                                                                                                                       |
| 14b                      | Descriptive data         | (b) Indicate number of participants with missing data for each variable of interest                                                                                                                          | <input checked="" type="checkbox"/> | Not applicable (data complete)                                                                                                                          |
| 15                       | Outcome data             | Cross-sectional study—Report numbers of outcome events or summary measures                                                                                                                                   | <input checked="" type="checkbox"/> | Results section, Table 1, page 11                                                                                                                       |
| 16a                      | Main results             | (a) Give unadjusted estimates and, if applicable, confounder-adjusted estimates and their precision (eg, 95% confidence interval). Make clear which confounders were adjusted for and why they were included | <input checked="" type="checkbox"/> | Not applicable: descriptive population estimates of knowledge, attitudes, behaviours                                                                    |
| 16b                      | Main results             | (b) Report category boundaries when continuous variables were categorized                                                                                                                                    | <input checked="" type="checkbox"/> | Not applicable                                                                                                                                          |
| 16c                      | Main results             | (c) If relevant, consider translating estimates of relative risk into absolute risk for a meaningful time period                                                                                             | <input checked="" type="checkbox"/> | Not applicable                                                                                                                                          |
| 17                       | Other analyses           | Report other analyses done—eg analyses of subgroups and interactions, and sensitivity analyses                                                                                                               | <input checked="" type="checkbox"/> | Throughout results section, pages 9-14, e.g. sensitivity analysis of antibiotic classifications in Footnote iv                                          |
| <b>Discussion</b>        |                          |                                                                                                                                                                                                              |                                     |                                                                                                                                                         |
| 18                       | Key results              | Summarise key results with reference to study objectives                                                                                                                                                     | <input checked="" type="checkbox"/> | Discussion/conclusion section, pages 14-15                                                                                                              |
| 19                       | Limitations              | Discuss limitations of the study, taking into account sources of potential bias or imprecision. Discuss both direction and magnitude of any potential bias                                                   | <input checked="" type="checkbox"/> | Discussion/conclusion section, pages 15-16                                                                                                              |
| 20                       | Interpretation           | Give a cautious overall interpretation of results considering objectives, limitations, multiplicity of analyses, results from similar studies, and other relevant evidence                                   | <input checked="" type="checkbox"/> | Discussion/conclusion section, lines 16-17                                                                                                              |
| 21                       | Generalisability         | Discuss the generalisability (external validity) of the study results                                                                                                                                        | <input checked="" type="checkbox"/> | Discussion/conclusion section, page 16                                                                                                                  |
| <b>Other information</b> |                          |                                                                                                                                                                                                              |                                     |                                                                                                                                                         |
| 22                       | Funding                  | Give the source of funding and the role of the funders for the present study and, if applicable, for the original study on which the present article is based                                                | <input checked="" type="checkbox"/> | See funding declaration, page 19                                                                                                                        |

# BMJ Open

## Antibiotic Knowledge, Attitudes, and Practices: New Insights from Cross-Sectional Rural Health Behaviour Surveys in Low- and Middle-Income Southeast Asia

|                               |                                                                                                                                                                                                                                                                                                                                                                                                                                                                                                                                                                                                                                                                                                                                                                                                                                                                                                                                                                                                                                                                                                                                                                                                                                                                                                                                                                                                                                                                                                                                                                                                                                                                                                                                                                                                                                                                                                                                                                                                                                                                                                                                                                                                     |
|-------------------------------|-----------------------------------------------------------------------------------------------------------------------------------------------------------------------------------------------------------------------------------------------------------------------------------------------------------------------------------------------------------------------------------------------------------------------------------------------------------------------------------------------------------------------------------------------------------------------------------------------------------------------------------------------------------------------------------------------------------------------------------------------------------------------------------------------------------------------------------------------------------------------------------------------------------------------------------------------------------------------------------------------------------------------------------------------------------------------------------------------------------------------------------------------------------------------------------------------------------------------------------------------------------------------------------------------------------------------------------------------------------------------------------------------------------------------------------------------------------------------------------------------------------------------------------------------------------------------------------------------------------------------------------------------------------------------------------------------------------------------------------------------------------------------------------------------------------------------------------------------------------------------------------------------------------------------------------------------------------------------------------------------------------------------------------------------------------------------------------------------------------------------------------------------------------------------------------------------------|
| Journal:                      | <i>BMJ Open</i>                                                                                                                                                                                                                                                                                                                                                                                                                                                                                                                                                                                                                                                                                                                                                                                                                                                                                                                                                                                                                                                                                                                                                                                                                                                                                                                                                                                                                                                                                                                                                                                                                                                                                                                                                                                                                                                                                                                                                                                                                                                                                                                                                                                     |
| Manuscript ID                 | bmjopen-2018-028224.R1                                                                                                                                                                                                                                                                                                                                                                                                                                                                                                                                                                                                                                                                                                                                                                                                                                                                                                                                                                                                                                                                                                                                                                                                                                                                                                                                                                                                                                                                                                                                                                                                                                                                                                                                                                                                                                                                                                                                                                                                                                                                                                                                                                              |
| Article Type:                 | Research                                                                                                                                                                                                                                                                                                                                                                                                                                                                                                                                                                                                                                                                                                                                                                                                                                                                                                                                                                                                                                                                                                                                                                                                                                                                                                                                                                                                                                                                                                                                                                                                                                                                                                                                                                                                                                                                                                                                                                                                                                                                                                                                                                                            |
| Date Submitted by the Author: | 20-May-2019                                                                                                                                                                                                                                                                                                                                                                                                                                                                                                                                                                                                                                                                                                                                                                                                                                                                                                                                                                                                                                                                                                                                                                                                                                                                                                                                                                                                                                                                                                                                                                                                                                                                                                                                                                                                                                                                                                                                                                                                                                                                                                                                                                                         |
| Complete List of Authors:     | <p>Haenssger, Marco; University of Oxford Centre for Tropical Medicine, Center for Tropical Medicine and Global Health; University of Warwick, School of Cross Faculty Studies</p> <p>Charoenboon, Nutcha; Mahidol Oxford Tropical Medicine Research Unit</p> <p>Zanello, Giacomo; University of Reading, School of Agriculture, Policy and Development; Leverhulme Centre for Integrative Research on Agriculture and Health</p> <p>Mayxay, Mayfong; Lao-Oxford-Mahosot Hospital-Wellcome Trust Research Unit; Faculty of Postgraduate Studies, University of Health Sciences</p> <p>Reed-Tsochas, Felix; University of Oxford Said Business School, Said Business School; University of Oxford, Oxford Martin School</p> <p>Lubell, Yoel ; University of Oxford Centre for Tropical Medicine, Center for Tropical Medicine and Global Health; Mahidol Oxford Tropical Medicine Research Unit</p> <p>Wertheim, Heiman; Radbuod University, Medical Microbiology Department; Oxford University Clinical Research Unit</p> <p>Lienert, Jeffrey; University of Oxford Said Business School, ; National Human Genome Research Institute,</p> <p>Xayavong, Thippaphone; University for Peace, Department of Peace and Conflict Studies; Ateneo de Manila University, Department of Political Science</p> <p>Khine Zaw, Yuzana; London School of Hygiene and Tropical Medicine, Department of Global Health and Development</p> <p>Thepkhamkong, Amphayvone; Lao-Oxford-Mahosot Hospital-Wellcome Trust Research Unit</p> <p>Sithongdeng, Nicksan; Lao-Oxford-Mahosot Hospital-Wellcome Trust Research Unit</p> <p>Khamsoukthavong, Nid; Lao-Oxford-Mahosot Hospital-Wellcome Trust Research Unit</p> <p>Phanthavong, Chanthasone; Lao-Oxford-Mahosot Hospital-Wellcome Trust Research Unit</p> <p>Boualaiseng, Somsanith; Lao-Oxford-Mahosot Hospital-Wellcome Trust Research Unit</p> <p>Vongsavang, Souksakhone; Lao-Oxford-Mahosot Hospital-Wellcome Trust Research Unit</p> <p>Wibunjak, Kanokporn; Mahidol Oxford Tropical Medicine Research Unit</p> <p>Chai-in, Poowadon; Mahidol Oxford Tropical Medicine Research Unit, Thavethanutthanawin, Patthanawin; Mahidol Oxford Tropical Medicine</p> |

|                                 |                                                                                                                                                                                                                                                                                                                                                                                                                                                                                                                                                                                                                                                                                                                                                                                                                                                                                                                                           |
|---------------------------------|-------------------------------------------------------------------------------------------------------------------------------------------------------------------------------------------------------------------------------------------------------------------------------------------------------------------------------------------------------------------------------------------------------------------------------------------------------------------------------------------------------------------------------------------------------------------------------------------------------------------------------------------------------------------------------------------------------------------------------------------------------------------------------------------------------------------------------------------------------------------------------------------------------------------------------------------|
|                                 | <p>Research Unit<br/>Althaus, Thomas; University of Oxford Centre for Tropical Medicine, Center for Tropical Medicine and Global Health; Mahidol Oxford Tropical Medicine Research Unit</p> <p>Greer, Rachel; Mahidol Oxford Tropical Medicine Research Unit, Faculty of Tropical Medicine Mahidol University; Chiangrai Regional Hospital, Chiangrai Clinical Research Unit</p> <p>Nedsuwan, Supalert; Chiangrai Regional Hospital, Primary Care Department</p> <p>Wangrangsimakul, Tri; Mahidol Oxford Tropical Medicine Research Unit; Chiangrai Regional Hospital, Chiangrai Clinical Research Unit</p> <p>Limmathurotsakul, Direk; Mahidol Oxford Tropical Medicine Research Unit,<br/>Elliott, Elizabeth; University College London, UCL Anthropology; Institut de recherche pour le développement</p> <p>Ariana, Proochista; University of Oxford Centre for Tropical Medicine, Center for Tropical Medicine and Global Health</p> |
| <b>Primary Subject Heading</b>: | Global health                                                                                                                                                                                                                                                                                                                                                                                                                                                                                                                                                                                                                                                                                                                                                                                                                                                                                                                             |
| Secondary Subject Heading:      | Health policy, Infectious diseases, Public health, Sociology                                                                                                                                                                                                                                                                                                                                                                                                                                                                                                                                                                                                                                                                                                                                                                                                                                                                              |
| Keywords:                       | Health policy < HEALTH SERVICES ADMINISTRATION & MANAGEMENT, TROPICAL MEDICINE, PUBLIC HEALTH                                                                                                                                                                                                                                                                                                                                                                                                                                                                                                                                                                                                                                                                                                                                                                                                                                             |
|                                 |                                                                                                                                                                                                                                                                                                                                                                                                                                                                                                                                                                                                                                                                                                                                                                                                                                                                                                                                           |

SCHOLARONE™  
Manuscripts



# Antibiotic Knowledge, Attitudes, and Practices: New Insights from Cross-Sectional Rural Health Behaviour Surveys in Low- and Middle-Income Southeast Asia

Marco J HAENSSGEN<sup>a, b, c, d</sup>, Nutchha CHAROENBOON<sup>d</sup>, Giacomo ZANELLO<sup>e, f</sup>, Mayfong MAYXAY<sup>a, g, h</sup>, Felix REED-TSOCHAS<sup>b, c, i</sup>, Yoel LUBELL<sup>a, d</sup>, Heiman FL WERTHEIM<sup>j, k</sup>, Jeffrey LIENERT<sup>b, c, l</sup>, Thippaphone XAYAVONG<sup>m, n</sup>, Yuzana KHINE ZAW<sup>o</sup>, Amphayvone THEPKHAMKONG<sup>g</sup>, Nicksan SITHONGDENG<sup>g</sup>, Nid KHAMSOUKTHAVONG<sup>g</sup>, Chanthasone PHANTHAVONG<sup>g</sup>, Somsanith BOUALAISENG<sup>g</sup>, Souksakhone VONGSAVANG<sup>g</sup>, Kanokporn WIBUNJAK<sup>d</sup>, Poowadon CHAI-IN<sup>d</sup>, Patthanant THAVETHANUTTHANAWIN<sup>d</sup>, Thomas ALTHAUS<sup>a, d</sup>, Rachel C GREER<sup>a, d</sup>, Supalert NEDSUWAN<sup>p</sup>, Tri WANGRANGSIMAKUL<sup>a, d</sup>, Direk LIMMATHUROTSAKUL<sup>d</sup>, Elizabeth ELLIOTT<sup>q, r</sup>, Proochista ARIANA<sup>a</sup>

<sup>a</sup>. Centre for Tropical Medicine and Global Health, Nuffield Department of Clinical Medicine, University of Oxford, Oxford, UK

<sup>b</sup>. CABDyN Complexity Centre, Saïd Business School, University of Oxford, Oxford, UK

<sup>c</sup>. Green Templeton College, Oxford, UK

<sup>d</sup>. Mahidol Oxford Tropical Medicine Research Unit, Faculty of Tropical Medicine, Mahidol University, Bangkok, Thailand

<sup>e</sup>. School of Agriculture, Policy and Development, University of Reading, Reading, UK

<sup>f</sup>. Leverhulme Centre for Integrative Research on Agriculture and Health, London, UK

<sup>g</sup>. Lao Oxford Mahosot Wellcome Trust Research Unit (LOMWRU), Mahidol Oxford Tropical Medicine Research Unit (MORU), Faculty of Tropical Medicine, Mahidol University, Bangkok, Thailand

<sup>h</sup>. Institute of Research and Education Development, University of Health Sciences, Vientiane, Lao PDR

<sup>i</sup>. Oxford Martin School, University of Oxford, Oxford, UK

<sup>j</sup>. Oxford University Clinical Research Unit (OUCRU), Ho Chi Minh City, Viet Nam

<sup>k</sup>. Medical Microbiology Department, Radboudumc, Nijmegen, Netherlands

<sup>l</sup>. National Human Genome Research Institute, National Institutes of Health, Bethesda, MD, US

<sup>m</sup>. Department of Peace and Conflict Studies, University for Peace, Costa Rica

<sup>n</sup>. Department of Political Science, School of Social Science, Ateneo de Manila University, Manila, Philippines

<sup>o</sup>. Department of Global Health and Development, London School of Hygiene & Tropical Medicine, London, UK

<sup>p</sup>. Primary Care Department, Chiangrai Prachanukroh Hospital, Chiang Rai, Thailand

<sup>q</sup>. UCL Anthropology, University College London, London, UK

<sup>r</sup>. Institut de recherche pour le développement, Vientiane, Lao PDR

Corresponding author: Marco J HAENSSGEN, Centre for Tropical Medicine and Global Health, Nuffield Department of Medicine, University of Oxford, Old Road Campus, Roosevelt Drive, Oxford OX3 7FZ, UK; phone: +66(0)951906543; email: marco.haenssngen@warwick.ac.uk

## WORD COUNT

4,371 (main text, excl. references, figures and tables)

## KEYWORDS

Antimicrobial resistance, antibiotics, awareness, treatment-seeking behaviour, survey, social sciences, development studies, interdisciplinary research, Thailand, Lao PDR

1  
2  
3 42 **ABSTRACT**  
4  
5

6 43 **Introduction:** Low- and middle-income countries (LMICs) are crucial in the global response to  
7  
8 44 antimicrobial resistance (AMR), but diverse health systems, healthcare practices, and cultural  
9  
10 45 conceptions of medicine can complicate global education and awareness-raising campaigns. Social  
11  
12 46 research can help understand LMIC contexts but remains underrepresented in AMR research.  
13  
14

15  
16 47 **Objective:** To (1) describe antibiotic-related knowledge, attitudes, and practices of the general  
17  
18 48 population in two LMICs and to (2) assess the role of antibiotic-related knowledge and attitudes on  
19  
20 49 antibiotic access from different types of healthcare providers.  
21  
22

23 50 **Design:** Observational study: cross-sectional rural health behaviour survey, representative on the  
24  
25 51 population level.  
26  
27

28 52 **Setting:** General rural population in Chiang Rai (Thailand) and Salavan (Lao PDR), surveyed between  
29  
30 53 November 2017 and May 2018.  
31  
32

33 54 **Participants:** 2141 adult members ( $\geq 18$  years) of the general rural population, representing 712,000  
34  
35 55 villagers.  
36  
37

38 56 **Outcome measures:** Antibiotic-related knowledge, attitudes, and practices across sites and healthcare  
39  
40 57 access channels.  
41  
42

43 58 **Findings:** Villagers were aware of antibiotics (Chiang Rai: 95.7%; Salavan: 86.4%;  $p < 0.001$ ) and drug  
44  
45 59 resistance (Chiang Rai: 74.8%; Salavan: 62.5%;  $p < 0.001$ ), but the usage of technical concepts for  
46  
47 60 antibiotics was dwarfed by local expressions like “anti-inflammatory medicine” in Chiang Rai (87.6%;  
48  
49 95% confidence interval [CI]: 84.9–90.0) and “*ampi*” in Salavan (75.6%; 95% CI: 71.4–79.4).  
50  
51 61 Multivariate linear regression suggested that attitudes against over-the-counter antibiotics were linked  
52  
53 62 to 0.12 additional antibiotic use episodes from public healthcare providers in Chiang Rai (95% CI:  
54  
55 63 0.01 – 0.23) and 0.53 in Salavan (95% CI: 0.16 – 0.90).  
56  
57 64  
58  
59  
60

1  
2  
3 65 **Conclusions:** Locally specific conceptions and counter-intuitive practices around antimicrobials can  
4  
5  
6 66 complicate AMR communication efforts and entail unforeseen consequences. Overcoming  
7  
8 67 “knowledge deficits” alone will therefore be insufficient for global AMR behaviour change. We call  
9  
10 68 for an expansion of behavioural AMR strategies towards “AMR-sensitive interventions” that address  
11  
12 69 context-specific upstream drivers of antimicrobial use (e.g. unemployment insurance) and complement  
13  
14  
15 70 education and awareness campaigns.

16  
17 71 **Registration:** clinicaltrials.gov identifier NCT03241316  
18  
19  
20  
21

## 22 72 **STRENGTH AND LIMITATIONS OF THIS STUDY**

- 23  
24 73 • Provincial-level representative survey using three-stage stratified cluster random sampling  
25  
26  
27 74 design
- 28  
29 75 • Survey based on preceding qualitative research on antibiotic use in Southeast Asia
- 30  
31  
32 76 • Inclusion of general population enables insights into formal and informal healthcare utilisation
- 33  
34 77 • Cross-sectional analysis of rural health behaviours excludes seasonal change and urban settings
- 35  
36 78 • Two-month recall period enabled greater inclusion but may bias responses towards better  
37  
38  
39 79 educated population groups

## 40 41 42 43 80 **MAIN TEXT**

### 44 45 46 47 81 **Introduction**

48  
49  
50 82 Antimicrobial resistance (AMR) threatens modern medicine by rendering antimicrobial drugs  
51  
52 83 ineffective. Multi-faceted global strategies target human, animal, and plant health alongside the  
53  
54  
55 84 environment and food production and safety to respond to this “superbug crisis” [1]. In human health,  
56  
57 85 supply-sided responses include incentives to stimulate drug research and development; action on the  
58  
59 86 demand side intends to limit and target antimicrobial use for instance through new diagnostic

1  
2  
3 87 technologies, public health intervention to improve vaccine coverage and hygiene, and other  
4  
5 88 antimicrobial stewardship activities like restricted dispensing of antibiotics and prescriber feedback  
6  
7  
8 89 [2-4]. As an interdisciplinary field, the social dimensions of the problem are being recognised in global  
9  
10 90 AMR policy, which are typically addressed via education and awareness-raising activities aimed at  
11  
12 91 governmental staff, healthcare workers, and the general public [2].  
13  
14

15 92 Low- and middle-income countries (LMICs) play an important role in the global response to AMR.  
16  
17 93 However, diverse health systems, healthcare practices, and conceptions related to the use of  
18  
19  
20 94 antimicrobials require social research to understand local contexts and the complexity of human  
21  
22 95 behaviour in LMIC settings. For example, with a focus on the health behaviour of the general public,  
23  
24 96 the anthropological literature suggests that social factors like precarity and discrimination can  
25  
26  
27 97 influence medicine use independently of awareness [5]; psychology and behavioural economics  
28  
29 98 indicate that health decision-making processes interact with the social environment and contextual  
30  
31 99 change to create adverse behavioural biases [6 7]; and communication studies research points at  
32  
33  
34 100 interferences between awareness campaigns and local contexts that can entail unforeseen  
35  
36 101 consequences like politicisation, stigmatisation, or accidentally encouraging the behaviours they try to  
37  
38 102 discourage [8 9]. Such examples underline the possible contribution of the social sciences to AMR,  
39  
40  
41 103 but they remain persistently underrepresented with less than 2% of all AMR-related publications (see  
42  
43 104 Figure A1 in supplementary file 1 for a time trend) [10]. This is problematic for at least three reasons:  
44

- 45  
46 105 • We currently have an insufficient social science knowledge base for behavioural interventions  
47  
48 106 in AMR—a global health priority that has attracted more than £600 million of AMR  
49  
50 107 expenditure and future commitments [11-13].
- 51  
52  
53 108 • The recent withdrawal of large pharmaceutical companies from antimicrobial research and  
54  
55 109 development [14] threatens the AMR supply-side response, requiring yet more effective action  
56  
57 110 on the demand side.  
58  
59  
60

- More extensive social sciences work can yield novel social innovations as a benefit of disciplinary diversification [15].

Using social research methods, the objectives of this paper were to (1) describe antibiotic-related knowledge, attitudes, and practices of the general population in two LMICs and to (2) assess the role of antibiotic-related knowledge and attitudes on antibiotic access from different types of healthcare providers. We report findings from a provincial-level representative survey of rural health behaviours across 69 villages in northern Thailand and 65 villages in southern Lao PDR as part of the interdisciplinary “Antibiotics and Activity Spaces” project [16].<sup>i</sup> We implemented the study in Southeast Asia, which is characterised as a region “at high risk of the emergence and spread of antibiotic resistance in humans” [17 18]. With more than 9% of global air passengers and more than 110 million international tourist arrivals in 2016 [19], the potential of cross-border spread of drug-resistant microbes also gives AMR research in Southeast Asia a global relevance—as the recent importation of multi-drug-resistant *Neisseria gonorrhoeae* to the UK showed [20]. Within Southeast Asia, Thailand and Lao PDR lent themselves for a comparative analysis because of their physical and cultural proximity, and Chiang Rai (Thailand) and Salavan (Lao PDR) in particular had similarly varied terrain and large and ethnically diverse rural populations. The main field site differences were Thailand’s more advanced economic and health system context and more established AMR action plan [21]. For example, Thailand maintains a national strategic plan on antimicrobial resistance (2017-2021) [22]. In addition, according to World Bank data, Thailand’s public health expenditure per capita in 2016 were nearly ten times higher than Lao’s (USD 496.2 vs. USD 50.1 in purchasing power parity), and Thailand had 2.3 nurses per 1,000 people in 2015, compared to 1.0 per 1,000 people in Lao PDR in 2014 [19].

---

<sup>i</sup> This paper contributes to the project’s research question, “*What are the manifestations and determinants of problematic antibiotic use in patients’ healthcare-seeking pathways?*” [16].

1  
2  
3  
4  
5  
6  
7  
8  
9  
10  
11  
12  
13  
14  
15  
16  
17  
18  
19  
20  
21  
22  
23  
24  
25  
26  
27  
28  
29  
30  
31  
32  
33  
34  
35  
36  
37  
38  
39  
40  
41  
42  
43  
44  
45  
46  
47  
48  
49  
50  
51  
52  
53  
54  
55  
56  
57  
58  
59  
60

## 133 **Methods**

### 134 *Multistage Survey Design*

135 Our study design was a three-stage stratified cluster random survey (Figure 1): Following the  
136 purposive selection of five districts per province, we selected a random sample of 30 primary sampling  
137 units (PSUs) per province (six per district), stratified by distance to the nearest district headquarters.  
138 The second stage was the selection of an interval sample of 5% but at least 30 of all households in the  
139 PSU, which we approximated as residential structures on satellite maps [23]. Participants were  
140 sampled in the third and final stage. This process involved the random selection of available household  
141 members (one for every five members). At each sampling stage, we substituted unavailable selections  
142 (1) with a stratified random replacement for the random PSU sample, (2) with the nearest available  
143 neighbour for the interval sample of households, and (3) with a simple random replacement for the  
144 random household member sample (replacement numbers indicated in Figure 1). The cross-sectional  
145 data collection took place between November 2017 and May 2018.

147 [Insert Figure 1 about here]

148 Figure 1. Survey sites and multi-stage sampling process.

149 Source: Authors, adapted from Wikimedia Commons [24].

150 Notes: Unavailable selections at each sampling stage were substituted with a random replacement for the random samples of PSUs and  
151 household members, and with the nearest available neighbour for the interval sample of households. One PSU could contain more than  
152 one administrative village; if the first-chosen village contained less than 600 houses, then adjacent villages would be included.  
153 PSU=Primary Sampling Unit.

### 155 *Study Population*

156 Our study population was the general adult population of rural Chiang Rai and Salavan (522,000 in  
157 Chiang Rai and 190,000 in Salavan as per census data), from whom we drew a representative sample  
158 of 1158 villagers in Chiang Rai and 983 in Salavan. We did not specifically sample patients, but we

1  
2  
3 159 recorded any acute illness episode or accident-related injury if one occurred within the last two months  
4  
5  
6 160 of the interview, both for the respondents and any children under their supervision.  
7

8 161  
9  
10  
11 162 *Patient and Public Involvement*  
12

13  
14 163 This study did not sample patients but only adult members of the general public. The survey instrument  
15  
16 164 was based on preceding qualitative research in Southeast Asia [25 26], in which patients, healthcare  
17  
18 165 providers, and healthy adults participated, but patients or members of the public were not directly  
19  
20  
21 166 involved in the design or conception of the study. This preceding research prompted the research  
22  
23 167 interest in treatment-seeking behaviours and conceptions of medicine and illness among the broader  
24  
25 168 rural population in Southeast Asia. We will disseminate our findings through outreach to policy  
26  
27  
28 169 stakeholders and local development organisations, through public engagement activities like the World  
29  
30 170 Antibiotic Awareness Week, and through our local network of collaborators in the field sites.  
31  
32

33 171  
34  
35  
36 172 *Data Collection*  
37

38  
39 173 Our survey instrument was a 45-minute face-to-face questionnaire (see supplementary file 2). It was  
40  
41 174 administered on tablets running the survey software SurveyCTO (Dobility Inc., Cambridge, MA,  
42  
43 175 USA) by locally recruited survey teams comprising seven enumerators and two survey supervisors per  
44  
45 176 country, who received five days of full-time classroom and field training. The original English  
46  
47  
48 177 questionnaire was co-developed with, and translated into Thai and Lao by, the local research team,<sup>ii</sup>  
49  
50 178 and local translators were recruited for the 228 instances where we encountered language barriers. The  
51  
52

53  
54  
55 <sup>ii</sup> We refrained from additional back-translation as the local-language versions of the questionnaire were based on  
56  
57 qualitative research material that we had previously used in the region, aided further by field pilots and cognitive  
58  
59 interviewing.  
60



1  
2  
3 179 questionnaires were piloted in rural Chiang Rai and Salavan, with 50 cognitive interviews supporting  
4  
5  
6 180 the questionnaire development and revision as well as the contextualisation of the survey data (not  
7  
8 181 reported here; interview guide in supplementary file 3) [27].  
9

10  
11 182 The questionnaire covered basic demographic and socio-economic information, antibiotic-related  
12  
13 183 knowledge and attitudes, and treatment-seeking behaviour during acute illnesses and accident-related  
14  
15 184 injuries. When measuring people's awareness of antibiotics, we could not simply ask villagers whether  
16  
17 185 they knew what "antibiotics" are, considering that (a) a variety of local terms related to antibiotics  
18  
19  
20 186 existed, (b) people may be familiar with specific antibiotic brands but not aware of their antibiotic  
21  
22 187 attributes, and (c) the understanding of technical language was uncommon (see Results section for  
23  
24  
25 188 evidence on this point). We therefore asked respondents first if they recognised images of common  
26  
27 189 antibiotics in the field site.<sup>iii</sup> In the 108/1974 (5.5%) of cases where the respondents did not mention  
28  
29 190 "antibiotics," its colloquial equivalents, or the names of specific antibiotic types, we asked them if they  
30  
31 191 had heard about "anti-inflammatory drugs" ("ยาแก้อักเสบ" or "yah kae ak seb") in Thai and "germ  
32  
33  
34 192 resisters" ("ຢາຕ້ານເຊື້ອ" or "yah dtan suea") in Lao as common local notions of "antibiotics."  
35  
36  
37 193 We next asked about the purposes for which the respondent would use these antibiotics, which served  
38  
39  
40 194 as information alongside inputs from local pharmacists to triangulate in later parts of the questionnaire  
41  
42 195 whether the respondent received antibiotics during an illness. However, 752/2986 (25.2%) medicine  
43  
44 196 use episodes could not be confirmed as either antibiotic or non-antibiotic (e.g. "white powder" or  
45  
46  
47 197 "green capsule"). We included these uncertain cases as "potential" antibiotic use episodes to capture  
48  
49 198 behaviour more comprehensively.  
50

51  
52 199  
53  
54  
55  
56  
57 <sup>iii</sup> Three images on the survey tablet in Chiang Rai and a bag with seven local antibiotics in Salavan (considering the wider range of  
58  
59 terms and medicines in circulation). See questionnaire in supplementary file 2.  
60



1  
2  
3 200 *Data Analysis*  
4  
5

6 201 In order to inform the current global health agenda on antibiotic education and awareness raising, we  
7  
8 202 used descriptive statistical analysis and regression analysis to describe the patterns of knowledge and  
9  
10  
11 203 attitudes – and their role in determining antibiotic use – across the two field sites, using the variables  
12  
13 204 described in Table A1 in supplementary file 1. If the common policy narrative holds, then we would  
14  
15 205 expect rural populations in Chiang Rai and Salavan to exhibit:

- 16  
17  
18 206 • low degrees of antibiotic-related knowledge,
- 19  
20  
21 207 • generally high levels of antibiotic consumption especially from informal sources (e.g.  
22  
23 208 unregistered shops selling antibiotics over the counter), and
- 24  
25 209 • lower general antibiotic use and a higher share of supervised antibiotic use from formal  
26  
27 210 healthcare providers among people whose attitudes correspond to awareness-raising messages  
28  
29  
30 211 for AMR (based on FAO/OIE/WHO material, see Table A1 in supplementary file 1) [1].

31  
32  
33 212 We stratified and compared the samples by field site (i.e. province) to account for the systemic  
34  
35 213 influence of the health system configuration on people's health knowledge and behaviour in Chiang  
36  
37 214 Rai and Salavan. We estimated provincially representative patterns using post-stratification weights  
38  
39 215 based on census data (considering village size and district-specific age and gender composition) and  
40  
41  
42 216 adjusting the descriptive and regression analysis results for the multi-stage sampling design with the  
43  
44 217 help of the SVY suite of commands in Stata 15 (StataCorp, College Station, TX, USA). We separately  
45  
46 218 analysed the full sample and the subset of respondents who reported a recent illness, whereby we tested  
47  
48  
49 219 differences in knowledge, attitudes, and behaviours across provinces and across antibiotic access  
50  
51 220 channels with  $\chi^2$  tests for binary and Wilcoxon rank-sum tests (two-sided) for non-normally distributed  
52  
53 221 variables. We further carried out multivariate analysis of the determinants of antibiotic use from public  
54  
55  
56 222 (public hospitals and primary care units), private (private hospitals, clinics, and pharmacies), and  
57  
58 223 informal sources (grocery stores selling medicine, traditional healers). The multivariate analysis used  
59  
60 224 linear regression models adjusted by the complex survey design (sampling clusters and survey

1  
2  
3  
4  
5  
6  
7  
8  
9  
10  
11  
12  
13  
14  
15  
16  
17  
18  
19  
20  
21  
22  
23  
24  
25  
26  
27  
28  
29  
30  
31  
32  
33  
34  
35  
36  
37  
38  
39  
40  
41  
42  
43  
44  
45  
46  
47  
48  
49  
50  
51  
52  
53  
54  
55  
56  
57  
58  
59  
60

weights), which we compared across the two country samples, using the Chow test to ascertain systematic differences in the determinants of antibiotic use across the two field sites [28].<sup>iv</sup> We indicated significance levels below 0.1, 0.05, and 0.01 with \*, \*\*, and \*\*\*, respectively.

## Results

Representative statistical data of Chiang Rai and Salavan are presented in Appendix Table 1. In terms of socio-demographic characteristics of the rural population in the two provinces, Chiang Rai villagers were older on average ( $p<0.001$ ), tended to have received more formal education ( $p<0.001$ ), and had higher asset wealth ( $p<0.001$ ), while fewer Salavan villagers belonged to the local majority ethnicity ( $p=0.030$ ).

Respondents' recognition of antibiotics in Chiang Rai was significantly higher than in Salavan, but overall high in both sites (Chiang Rai: 95.7%; Salavan: 86.4%;  $p<0.001$ ). Recognition of the phrase "drug resistance" was high as well, whereby 74.8% recognised the term in Chiang Rai and 62.5%

---

<sup>iv</sup> Although the dependent variables were not normally distributed, the otherwise preferable functional form of Poisson regression did not converge in most cases owing to the relatively small sample sizes. However, where they did converge, the linear regressions yielded more conservative estimates (likewise, the linear regressions adjusted by the complex survey design yielded more conservative results than linear multilevel models that take the hierarchical structure of the data into account). We therefore present the linear regression results in this article. For improved model fitness and to reduce the influence of outliers, we further substituted the duration of the illness with its log. To test for multicollinearity in the cross-sectional survey data, we analysed the pairwise correlations between all independent variables stratified by field site, whereby the largest correlation coefficients in Chiang Rai were +0.59 (ethnicity/religion) and -0.50 (education/age), and in Salavan +0.76 (ethnicity/religion) and +0.62 (religion/wealth) (see Table A3 in supplementary file 1). The largest variance inflation factors (VIFs) were for the dummy variables of religion (VIF = 3.12 in the Salavan sample) and ethnicity (VIF = 2.01 in the Chiang Rai sample), the exclusion of which from the regression models did not produce meaningful differences in parameter estimates or significance levels of the other independent variables. We therefore presented the full regression models to not omit independent variables selectively.

( $p < 0.001$ ) recognised either of the two common variations in Salavan. Appendix Table 1 further indicates that antibiotic-related knowledge and attitudes aligned more closely with FAO/OIE/WHO messages in Chiang Rai than in Salavan ( $p < 0.001$  for all four questions). Across the four questions, respondents in rural Chiang Rai had an average answer score of 1.8 as opposed to rural Salavan with 0.7 ( $p < 0.001$ ).

Figure 2, Panel a, demonstrates the ways in which people related to “antibiotics.” In Chiang Rai, respondents commonly referred to antibiotics as “anti-inflammatory drug,” representing 87.6% of all responses (“ยามแก้อักเสบ” or “*yah kae ak seb*,” a vernacular notion specific to antibiotics).<sup>v</sup> Only 7.2% used the official term for “antibiotic” (“ยาปฏิชีวนะ” or “*yah pa ti chee wa na*”) alongside “germ killer” and specific antibiotic types like “*corlam*” (chloramphenicol; 4.6%). In rural Salavan, a larger portion of 38.6% used the official term for antibiotics (“ຍາຕ ງານຊ ອ” or “*yah dtan suea*,” translated as “germ resister”), but Salavan respondents were also more likely to use various colloquial expressions for specific types of antibiotics, like “*Ampi*” with 75.6% and “*Amok*” with 35.3%.

Reported purposes of antibiotic use were yet more varied and are displayed in Figure 2, Panel b. The overall most common use was the treatment of external wounds (Chiang Rai: 33.7%; Salavan: 44.4%;  $p < 0.001$ ). Other frequently reported uses in Salavan included coughs (30.5%; Chiang Rai: 10.9%;  $p < 0.001$ ) and fevers (30.5%; Chiang Rai: 8.3%;  $p < 0.001$ ). Thai respondents further indicated common use of antibiotics for sore throats (Chiang Rai: 36.3%, where it was the single most common use; Salavan: 28.9%;  $p = 0.016$ ) and for the more general idea of an “inflammation” of the body (Chiang Rai: 23.5%; Salavan: 18.6%;  $p = 0.083$ ). Thai respondents would also more often limit their use to whatever a healthcare worker would recommend (Chiang Rai: 9.5%; Salavan: 5.4%;  $p = 0.037$ ), while 2.3% indicated that they would treat their plants or animals (dogs and chickens) with antibiotics

<sup>v</sup> Actual anti-inflammatory medicine like ibuprofen would usually be referred to by its brand names.

1  
2  
3  
4  
5  
6  
7  
8  
9  
10  
11  
12  
13  
14  
15  
16  
17  
18  
19  
20  
21  
22  
23  
24  
25  
26  
27  
28  
29  
30  
31  
32  
33  
34  
35  
36  
37  
38  
39  
40  
41  
42  
43  
44  
45  
46  
47  
48  
49  
50  
51  
52  
53  
54  
55  
56  
57  
58  
59  
60

259 (Salavan: 0.1%;  $p < 0.001$ ). Using antibiotics to treat infections or to fight bacteria and germs was only  
260 mentioned by a small minority of the rural populations (Chiang Rai: 2.4%; Salavan: 2.8%;  $p = 0.243$ ).

[Insert Figure 2 about here]

Figure 2. Common names and purposes for antibiotics.

Source: Authors' analysis of survey data.

Notes: Only including respondents who indicated that they had seen the presented medicine (i.e. common antibiotics) before. Chiang Rai:  $n = 1076$ ; Salavan:  $n = 775$ . Population-weighted statistics, accounting for complex survey design. Multiple response permitted. Error bars indicate 95% confidence interval.

Table 1 indicates that—though people typically recognised the term “drug resistance”—the responses to the question “*What do you think is drug resistance?*” only rarely corresponded to clinical definitions, and the coexistence of two common translations of the term in Lao PDR complicated the picture further. In Chiang Rai, 10.6% of the interpretations related to antibiotics and/or drug-resistant germs. Lao respondents linked the official term “*due yah*” to clinical definitions in 7.7% of all interpretations, and the colloquial term “*lueng yah*” in 9.6% of all interpretations. Not unlike other high- and low-income countries [29], drug resistance was typically interpreted as a growing tolerance of the body towards medicine as a result of repeated use (not limited to antibiotics). Other common interpretations in Chiang Rai were the incorrect or erratic use of medicine (12.5%), and an understanding of drug resistance as side-effects of or allergic reactions to medicine in general (4.2%). In Salavan, “*due yah*” was often interpreted as a refusal or “stubbornness” to take medicine (21.8%; possibly due to its literal translation into “*stubborn [to the effect of] medicine*”), while its vernacular equivalent “*lueng yah*” was often interpreted in the opposite way as a psychological dependence or addiction to medicine (24.9%).

Table 1. Awareness and interpretations of “drug resistance.”

|                               |                                                       | Chiang Rai                  |                                                       | Salavan                    |                                                                                     |
|-------------------------------|-------------------------------------------------------|-----------------------------|-------------------------------------------------------|----------------------------|-------------------------------------------------------------------------------------|
|                               |                                                       | “due yah”                   | “due yah”                                             | “due yah”                  | “lueng yah”                                                                         |
| Awareness in rural population |                                                       | 72.9%<br>(67.4–77.8)        | 27.1%<br>(22.2–32.6)                                  | 58.8%<br>(54.6–63.0)       |                                                                                     |
| <b>Top 5 interpretations</b>  |                                                       |                             |                                                       |                            |                                                                                     |
| Rank 1                        | Body becomes tolerant to medicine                     | 54.1%<br>(49.3–58.9)        | Body becomes tolerant to medicine                     | 38.1%<br>(30.4–46.4)       | Body becomes tolerant to medicine<br>50.9%<br>(44.7–57.1)                           |
| Rank 2                        | Taking medicine incorrectly                           | 12.5%<br>(10.2–15.3)        | Patient is “stubborn,” refuses medicine               | 21.8%<br>(14.8–31.0)       | Addicted to / preference for medicine<br>24.9%<br>(20.2–30.2)                       |
| Rank 3                        | <b>Reference to antibiotics, drug-resistant germs</b> | <b>10.6%<br/>(8.1–13.8)</b> | Side-effects, drug allergy                            | 9.2%<br>(5.2–15.8)         | <b>Reference to antibiotics, drug-resistant germs</b><br><b>9.6%<br/>(6.9–13.1)</b> |
| Rank 4                        | Don’t know                                            | 6.3%<br>(4.6–8.7)           | <b>Reference to antibiotics, drug-resistant germs</b> | <b>7.7%<br/>(4.7–12.5)</b> | Don’t know<br>4.0%<br>(2.3–6.8)                                                     |
| Rank 5                        | Side-effects, drug allergy                            | 4.2%<br>(2.6–6.7)           | Addicted to / preference for medicine                 | 7.1%<br>(3.5–13.8)         | Sickness is “stubborn” / unresponsive<br>2.9%<br>(1.3–6.2)                          |

Source: Authors’ analysis of survey data.

Notes: Ranking percentages only include respondents who indicated that they had heard the respective term “drug resistance” before. 95% confidence intervals in parentheses. Chiang Rai:  $n = 871$ ; Salavan (*due yah*):  $n = 206$ ; Salavan (*lueng yah*):  $n = 470$ . Population-weighted statistics, accounting for complex survey design. Only single response permitted. In Salavan, the common response “*due yah*” means *lueng yah*” (24.8% [18.4–32.6]) was recoded to incorporate respondent’s definition of *lueng yah*.

According to our survey data, 99.9% of the rural population in Chiang Rai and 91.6% of the rural Salavan population had a public primary healthcare centre within a 10km radius. Private sources were more varied, as 93.0% and 34% of the rural Chiang Rai population had a private clinic and a pharmacy within a 10km radius, respectively (37.8% and 47.4% in Salavan, respectively), whereas informal healthcare through shops and informal healers was nearly universally available within the survey villages (>97.8% in all cases).

Among our 2141 respondents, we captured 608 illness episodes in Chiang Rai and 356 in Salavan (Appendix Table 1). Healthcare utilisation during these episodes varied slightly across the two field sites. Chiang Rai respondents accessed a narrower spectrum of healthcare providers and were significantly less likely to access public and “other” healthcare providers ( $p < 0.001$  in both cases). Both

1  
2  
3 301 sites also exhibited a high level of medicine access, with 2.2 and 2.5 medicine use episodes during an  
4  
5  
6 302 illness Chiang Rai and Salavan, respectively ( $p=0.050$ ). Respondents in Chiang Rai thereby indicated  
7  
8 303 higher use of non-antibiotic medicine (Chiang Rai: 1.6; Salavan: 1.3;  $p=0.048$ ). In contrast,  
9  
10 304 respondents in Salavan had more episodes of antibiotic use per illness (Chiang Rai: 0.2; Salavan: 0.4;  
11  
12 305  $p<0.001$ ), and more usage of medicines that could potentially include antibiotics (Chiang Rai: 0.4;  
13  
14  
15 306 Salavan: 0.9;  $p<0.001$ ). The pattern of antibiotic access was similar for informal sources, but generally  
16  
17 307 lower in Chiang Rai: confirmed antibiotic use from informal channels represented 1.6% of all medicine  
18  
19 308 use episodes in Chiang Rai and 3.3% in Salavan; and 3.6% in Chiang Rai and 7.9% in Salavan if  
20  
21  
22 309 unconfirmed but potential antibiotic use episodes are included.

23  
24  
25 310 Comparing the bivariate differences between individuals who accessed antibiotics from public, private,  
26  
27 311 and informal sources (see Table A2 in supplementary file 1) indicated that, contrary to intuition,  
28  
29 312 patients receiving antibiotics from informal sources had no less wealth or formal education than users  
30  
31 313 of public healthcare. Indeed, wealthier and more educated individuals in Chiang Rai were significantly  
32  
33  
34 314 associated with receiving antibiotics from informal sources (wealth:  $p=0.012$ ; education:  $p=0.032$ ).  
35  
36 315 Similarly, awareness of drug resistance was not significantly lower among patients who received  
37  
38 316 antibiotics from informal sources, while the share of respondents who linked drug resistance to  
39  
40  
41 317 biomedical notions of AMR in Salavan was significantly higher among individuals accessing  
42  
43 318 antibiotics through informal channels compared to public channels (13.4% vs. 4.4%,  $p=0.030$ ).  
44  
45 319 Patients who accessed antibiotics through informal channels were nevertheless significantly more  
46  
47  
48 320 inclined towards buying over-the-counter antibiotics than public antibiotic users (Chiang Rai:  $p=0.040$ ;  
49  
50 321 Salavan:  $p<0.001$ ).

51  
52  
53 322 The results of the multivariate analysis are presented in Table 2. The dependent variables were the  
54  
55 323 number of confirmed antibiotic use episodes from public, private, and informal sources; as a sensitivity  
56  
57 324 check, we also included the more inclusive definition of “confirmed and potential” antibiotic use  
58  
59 325 episodes. The relationship between antibiotic-related knowledge and attitudes and antibiotic use was  
60

1  
2  
3 326 mixed. Among the most common knowledge- and attitude-related predictors of antibiotic use was the  
4  
5  
6 327 respondents' inclination to buy antibiotics. Again contrary to expectations, the attitude to not buy  
7  
8 328 antibiotics over the counter was linked to disproportionate consumption of antibiotics from public  
9  
10 329 sources. For example, patients who would not buy antibiotics over the counter would have 0.12  
11  
12 330 additional potential antibiotic use episodes in Chiang Rai (Model 7; 95% CI: 0.01 – 0.23) and up to  
13  
14  
15 331 0.53 in Salavan (Model 8; 95% CI: 0.16 – 0.90), *ceteris paribus*. Also knowledge of antibiotics was  
16  
17 332 positively associated with antibiotic consumption from private sources in Chiang Rai (Model 3) and  
18  
19 333 from public and informal sources in Salavan (Models 2 and 6). In contrast, other antibiotic-related  
20  
21 334 attitudes and knowledge linked negatively to antibiotic consumption. For example, the knowledge that  
22  
23  
24 335 antibiotic resistance can spread was linked to 0.25 fewer potential antibiotic use episodes from  
25  
26 336 informal sources (Model 12, 95% CI: -0.39 – -0.10) and Chiang Rai patients who preferred alternatives  
27  
28  
29 337 over antibiotics had 0.12 fewer confirmed antibiotic use episodes from private sources (Model 3; 95%  
30  
31 338 CI: -0.22 – -0.03).

32  
33  
34 339 Among other covariates, wealthier patients had lower consumption of antibiotics from public (Chiang  
35  
36 340 Rai and Salavan, Models 7 and 8) but also higher consumption from private (Salavan, Model 4) and  
37  
38 341 informal healthcare providers (Chiang Rai, Models 5 and 11) – presumably enabled by their higher  
39  
40  
41 342 purchasing power. Speakers of the majority language were also more likely to consume more  
42  
43 343 antibiotics from public sources, which resonates with anecdotes encountered during the field research  
44  
45 344 according to which speakers of minority languages tended to be less assertive in the patient-doctor  
46  
47 345 encounter (the link to education was less clear). Not surprisingly, longer illness episodes were also  
48  
49  
50 346 associated with more antibiotic use episodes from public and private sources.

51  
52  
53 347 The Chow test indicated that the determinants of confirmed antibiotic use from private sources were  
54  
55 348 significantly different in Chiang Rai and Salavan (Models 3 and 4;  $p=0.011$ ), as were all sources of  
56  
57 349 potential and confirmed antibiotic use (Models 7 to 12;  $p=0.056$ ,  $p=0.015$ , and  $p=0.083$  for public,  
58  
59 350 private, and informal antibiotic use, respectively).  
60



Table 2. Regression results of determinants of antibiotic use from public, private, and informal sources.

| Site<br>Model number                             | Confirmed antibiotic use episodes |                           |                            |                          |                            |                             | Confirmed and potential antibiotic use episodes |                           |                           |                           |                          |                              |
|--------------------------------------------------|-----------------------------------|---------------------------|----------------------------|--------------------------|----------------------------|-----------------------------|-------------------------------------------------|---------------------------|---------------------------|---------------------------|--------------------------|------------------------------|
|                                                  | Public providers                  |                           | Private providers          |                          | Informal providers         |                             | Public providers                                |                           | Private providers         |                           | Informal providers       |                              |
|                                                  | CR<br>(1)                         | SAL<br>(2)                | CR<br>(3)                  | SAL<br>(4)               | CR<br>(5)                  | SAL<br>(6)                  | CR<br>(7)                                       | SAL<br>(8)                | CR<br>(9)                 | SAL<br>(10)               | CR<br>(11)               | SAL<br>(12)                  |
| <b>Independent variables</b>                     |                                   |                           |                            |                          |                            |                             |                                                 |                           |                           |                           |                          |                              |
| Would not buy antibiotics over the counter       | 0.045*<br>(-0.01 - 0.10)          | 0.168**<br>(0.02 - 0.32)  | 0.074<br>(-0.02 - 0.16)    | -0.040<br>(-0.13 - 0.05) | -0.050<br>(-0.11 - 0.01)   | -0.008<br>(-0.09 - 0.08)    | 0.117**<br>(0.01 - 0.23)                        | 0.530***<br>(0.16 - 0.90) | 0.151*<br>(-0.03 - 0.33)  | -0.095<br>(-0.33 - 0.14)  | -0.031<br>(-0.10 - 0.04) | 0.021<br>(-0.14 - 0.18)      |
| Prefers antibiotics over alternatives            | -0.023<br>(-0.08 - 0.03)          | -0.017<br>(-0.12 - 0.08)  | -0.124**<br>(-0.22 - 0.03) | -0.009<br>(-0.10 - 0.08) | 0.033<br>(-0.02 - 0.08)    | -0.014<br>(-0.09 - 0.07)    | -0.026<br>(-0.17 - 0.12)                        | -0.222*<br>(-0.44 - 0.00) | -0.161*<br>(-0.35 - 0.03) | 0.054<br>(-0.18 - 0.28)   | 0.005<br>(-0.07 - 0.08)  | 0.044<br>(-0.10 - 0.19)      |
| Does not keep antibiotics for future use         | -0.049*<br>(-0.10 - 0.00)         | -0.008<br>(-0.11 - 0.09)  | -0.060<br>(-0.14 - 0.02)   | -0.013<br>(-0.12 - 0.09) | -0.024<br>(-0.08 - 0.03)   | 0.037<br>(-0.07 - 0.15)     | -0.073<br>(-0.20 - 0.05)                        | 0.185<br>(-0.18 - 0.55)   | -0.056<br>(-0.25 - 0.14)  | 0.056<br>(-0.26 - 0.37)   | -0.049<br>(-0.12 - 0.02) | -0.050<br>(-0.21 - 0.11)     |
| Knows that antibiotic resistance can spread      | 0.041<br>(-0.05 - 0.13)           | -0.088<br>(-0.35 - 0.17)  | 0.030<br>(-0.11 - 0.17)    | -0.051<br>(-0.34 - 0.24) | 0.035<br>(-0.04 - 0.11)    | -0.155***<br>(-0.25 - 0.06) | 0.068<br>(-0.15 - 0.29)                         | -0.355<br>(-1.53 - 0.82)  | -0.060<br>(-0.25 - 0.13)  | -0.138<br>(-0.73 - 0.46)  | 0.013<br>(-0.09 - 0.11)  | -0.247***<br>(-0.39 - -0.10) |
| Aware of antibiotics                             | -0.028<br>(-0.12 - 0.07)          | 0.101*<br>(-0.00 - 0.20)  | 0.109**<br>(0.01 - 0.21)   | 0.017<br>(-0.08 - 0.11)  | -0.135<br>(-0.38 - 0.10)   | 0.064**<br>(0.01 - 0.12)    | 0.093<br>(-0.20 - 0.39)                         | 0.185<br>(-0.28 - 0.65)   | -0.197<br>(-0.78 - 0.39)  | -0.346<br>(-0.94 - 0.25)  | -0.073<br>(-0.33 - 0.18) | 0.130*<br>(-0.00 - 0.26)     |
| Aware of drug resistance <sup>a</sup>            | -0.041<br>(-0.11 - 0.03)          | 0.056<br>(-0.08 - 0.20)   | 0.056<br>(-0.03 - 0.14)    | 0.086<br>(-0.04 - 0.21)  | 0.016<br>(-0.01 - 0.05)    | 0.014<br>(-0.09 - 0.12)     | -0.143*<br>(-0.29 - 0.01)                       | -0.041<br>(-0.39 - 0.31)  | -0.063<br>(-0.33 - 0.20)  | 0.113<br>(-0.16 - 0.38)   | -0.024<br>(-0.09 - 0.04) | -0.027<br>(-0.20 - 0.14)     |
| Female                                           | -0.005<br>(-0.06 - 0.05)          | 0.086*<br>(-0.01 - 0.18)  | -0.005<br>(-0.09 - 0.08)   | -0.064<br>(-0.17 - 0.04) | 0.035<br>(-0.02 - 0.09)    | 0.049<br>(-0.03 - 0.13)     | -0.122<br>(-0.27 - 0.03)                        | 0.168<br>(-0.09 - 0.42)   | 0.001<br>(-0.19 - 0.20)   | -0.296*<br>(-0.59 - 0.00) | 0.028<br>(-0.04 - 0.09)  | 0.181**<br>(0.03 - 0.33)     |
| Age                                              | -0.001<br>(-0.00 - 0.00)          | -0.001<br>(-0.00 - 0.00)  | 0.003*<br>(0.01 - 0.00)    | -0.001<br>(-0.00 - 0.00) | -0.002*<br>(-0.00 - 0.00)  | 0.002<br>(0.00 - 0.00)      | 0.001<br>(-0.00 - 0.01)                         | -0.001<br>(-0.01 - 0.01)  | 0.009**<br>(0.02 - 0.00)  | -0.004<br>(0.00 - 0.00)   | -0.001<br>(-0.00 - 0.00) | 0.007**<br>(0.00 - 0.01)     |
| Education (years)                                | -0.002<br>(-0.01 - 0.01)          | -0.012*<br>(-0.02 - 0.00) | 0.004<br>(-0.01 - 0.02)    | 0.012<br>(-0.00 - 0.03)  | -0.006**<br>(-0.01 - 0.00) | 0.010<br>(0.00 - 0.02)      | 0.001<br>(-0.01 - 0.02)                         | -0.001<br>(-0.05 - 0.05)  | 0.015<br>(-0.01 - 0.04)   | 0.018<br>(-0.01 - 0.05)   | -0.001<br>(-0.01 - 0.01) | 0.010<br>(-0.01 - 0.03)      |
| Speaking Thai / Lao                              | 0.161***<br>(0.07 - 0.25)         | 0.251***<br>(0.10 - 0.40) | 0.005<br>(-0.12 - 0.13)    | -0.010<br>(-0.12 - 0.10) | 0.019<br>(-0.02 - 0.06)    | 0.058<br>(-0.01 - 0.13)     | -0.016<br>(-0.46 - 0.43)                        | 0.161<br>(-0.27 - 0.59)   | -0.336<br>(-0.79 - 0.12)  | -0.005<br>(-0.30 - 0.29)  | 0.033<br>(-0.05 - 0.12)  | 0.152**<br>(0.01 - 0.30)     |
| Wealth index                                     | -0.179<br>(-0.42 - 0.06)          | -0.105<br>(-0.47 - 0.26)  | -0.001<br>(-0.28 - 0.28)   | 0.340*<br>(-0.01 - 0.69) | 0.158**<br>(0.01 - 0.31)   | -0.121<br>(-0.35 - 0.10)    | -0.417*<br>(-0.90 - 0.06)                       | -1.073*<br>(-2.26 - 0.12) | 0.323<br>(-0.30 - 0.95)   | 0.505<br>(-0.30 - 1.31)   | 0.241**<br>(0.02 - 0.46) | 0.065<br>(-0.73 - 0.86)      |
| Buddhist religion                                | -0.016<br>(-0.11 - 0.08)          | -0.065<br>(-0.29 - 0.16)  | -0.074<br>(-0.21 - 0.06)   | -0.031<br>(-0.18 - 0.12) | 0.010<br>(-0.02 - 0.04)    | 0.028<br>(-0.06 - 0.12)     | -0.033<br>(-0.22 - 0.16)                        | 0.037<br>(-0.40 - 0.47)   | -0.122<br>(-0.44 - 0.19)  | -0.031<br>(-0.35 - 0.29)  | 0.017<br>(-0.05 - 0.08)  | -0.021<br>(-0.23 - 0.19)     |
| Thai/Lao nationality                             | -0.030<br>(-0.13 - 0.07)          | -0.140<br>(-0.53 - 0.25)  | -0.069<br>(-0.24 - 0.10)   | 0.013<br>(-0.11 - 0.13)  | -0.003<br>(-0.06 - 0.06)   | 0.088<br>(-0.03 - 0.21)     | 0.009<br>(-0.37 - 0.39)                         | 0.003<br>(-0.43 - 0.44)   | 0.005<br>(-0.52 - 0.53)   | -0.118<br>(-0.46 - 0.22)  | -0.078<br>(-0.24 - 0.09) | -0.603<br>(-1.95 - 0.74)     |
| Majority ethnic group (Thai/Lao Loum)            | 0.033<br>(-0.04 - 0.11)           | 0.169*<br>(-0.02 - 0.36)  | 0.065<br>(-0.04 - 0.17)    | -0.059<br>(-0.19 - 0.07) | 0.050**<br>(0.01 - 0.09)   | -0.039<br>(-0.14 - 0.06)    | 0.049<br>(-0.11 - 0.21)                         | 0.360*<br>(-0.04 - 0.76)  | -0.044<br>(-0.27 - 0.18)  | 0.118<br>(-0.20 - 0.44)   | 0.035<br>(-0.03 - 0.10)  | 0.030<br>(-0.17 - 0.23)      |
| Self-rated severity (1=mild, 2=medium, 3=severe) | 0.063***<br>(0.02 - 0.10)         | 0.009<br>(-0.08 - 0.09)   | 0.002<br>(-0.05 - 0.05)    | 0.062<br>(-0.02 - 0.14)  | 0.009<br>(-0.02 - 0.04)    | 0.023<br>(-0.03 - 0.08)     | 0.077<br>(-0.02 - 0.17)                         | 0.254**<br>(0.01 - 0.50)  | 0.068<br>(-0.06 - 0.20)   | 0.107<br>(-0.17 - 0.39)   | 0.065**<br>(0.01 - 0.12) | -0.038<br>(-0.20 - 0.12)     |
| Log of duration of illness episode (days)        | 0.060***<br>(0.02 - 0.10)         | 0.036<br>(-0.01 - 0.08)   | 0.076***<br>(0.03 - 0.12)  | 0.046<br>(-0.01 - 0.10)  | 0.003<br>(-0.02 - 0.02)    | -0.025<br>(-0.07 - 0.02)    | 0.275***<br>(0.16 - 0.39)                       | 0.507***<br>(0.27 - 0.74) | 0.257***<br>(0.10 - 0.41) | 0.234**<br>(0.05 - 0.42)  | 0.005<br>(-0.03 - 0.04)  | -0.012<br>(-0.13 - 0.10)     |
| Constant                                         | -0.007<br>(-0.23 - 0.21)          | -0.123<br>(-0.55 - 0.30)  | -0.152<br>(-0.38 - 0.08)   | -0.198<br>(-0.46 - 0.07) | 0.117<br>(-0.12 - 0.35)    | -0.207*<br>(-0.43 - 0.02)   | -0.022<br>(-0.61 - 0.56)                        | -0.767<br>(-1.82 - 0.29)  | -0.181<br>(-1.08 - 0.72)  | 0.029<br>(-1.17 - 1.23)   | -0.006<br>(-0.37 - 0.35) | 0.199<br>(-1.18 - 1.58)      |
| <b>Model Statistics</b>                          |                                   |                           |                            |                          |                            |                             |                                                 |                           |                           |                           |                          |                              |
| Number                                           | 604                               | 356                       | 604                        | 356                      | 604                        | 356                         | 604                                             | 356                       | 604                       | 356                       | 604                      | 356                          |
| R <sup>2</sup>                                   | 0.102                             | 0.106                     | 0.080                      | 0.133                    | 0.104                      | 0.046                       | 0.143                                           | 0.218                     | 0.126                     | 0.136                     | 0.052                    | 0.095                        |
| F statistic                                      | 2.29***                           | 3.34***                   | 1.89**                     | 1.79**                   | 0.89                       | 1.48                        | 2.82***                                         | 4.57***                   | 2.41***                   | 1.30                      | 1.18                     | 2.27***                      |
| <b>Chow Test</b>                                 | <b>(2) - (1) = 0</b>              |                           | <b>(4) - (3) = 0</b>       |                          | <b>(6) - (5) = 0</b>       |                             | <b>(8) - (7) = 0</b>                            |                           | <b>(10) - (9) = 0</b>     |                           | <b>(12) - (11) = 0</b>   |                              |
| F statistic                                      | 1.33                              |                           | 2.05**                     |                          | 1.08                       |                             | 1.65*                                           |                           | 1.97**                    |                           | 1.55*                    |                              |

Source: Authors' analysis of survey data.

Notes: Illness episode level, including completed illnesses experienced by respondent or child under their supervision, excluding incomplete episodes. Population-weighted statistics, accounting for complex survey design. 95% confidence intervals in parentheses. CR = Chiang Rai. SAL = Salavan.

1  
2  
3 357 \*p < 0.1, \*\*p < 0.05, \*\*\*p < 0.01.

4 358 a. Comparing Thai “due yah” with the combined Lao “due yah” and “lueng yah.”  
5  
6

## 7 359 **Discussion and Conclusion**

8  
9  
10 360 Our paper aimed at understanding AMR-related general population behaviour in LMICs through a  
11  
12 361 description of antibiotic-related knowledge, attitudes, and practices in rural Thailand and Lao PDR,  
13  
14 362 and an assessment of the role of antibiotic-related knowledge and attitudes on antibiotic access from  
15  
16  
17 363 different types of healthcare providers. We demonstrated that rural populations exhibited:

- 18  
19  
20 364 • mixed but surprisingly high levels of awareness and attitudes corresponding to AMR  
21  
22 365 awareness-raising material, although only a minority of villagers were familiar with technical  
23  
24 366 notions of antibiotics and drug resistance;
- 25  
26  
27 367 • relatively low levels of antibiotic access from informal sources; and
- 28  
29 368 • surprisingly counter-intuitive links between informal antibiotic use, socio-economic status, and  
30  
31 369 their attitudes—especially among villagers in Salavan, who had disproportionately high  
32  
33 370 antibiotic use if their attitude showed a disinclination against over-the-counter antibiotics.  
34  
35

36 371 Our survey data also revealed profound differences between the two field sites despite their cultural  
37  
38  
39 372 and geographical proximity. For example, villagers referred to antibiotics with wide-ranging and  
40  
41 373 locally specific vernacular expressions (only a minority adopted technical language in either site), and  
42  
43 374 “drug resistance” was typically understood as a general tolerance of the body to medicine but local  
44  
45 375 interpretations ranged from patients refusing medicine to patients being addicted to medicine. Some  
46  
47  
48 376 of these differences could be explained by the local health system configuration. The better endowed  
49  
50 377 and more regulated health system as well as the more extensive public health campaigns in Chiang Rai  
51  
52 378 arguably contributed to the higher rates of public awareness and the comparatively lower rates of  
53  
54  
55 379 antibiotic use, whereas the Salavan health system faced more pressing trade-offs between ensuring  
56  
57 380 access to and preventing the overuse of antibiotics. Alas, as the analysis has shown, antibiotic-related  
58  
59  
60

1

2

3 381 awareness and attitudes appeared to have little bearing on people's antibiotic consumption when  
4  
5 382 controlling for other determinants of medicine use.

7

8 383 The surveys were implemented after the Monsoon season to reduce accessibility barriers like  
9  
10 384 landslides, floods, and farm work. This temporal focus meant that our survey was not able to capture  
11  
12 385 internal migration or seasonal change affecting the epidemiological environment. The rural survey is  
13  
14  
15 386 also unable to speak for urban health behaviour or behavioural patterns outside rural Thailand and Lao  
16  
17 387 PDR, or for awareness and behaviour among healthcare staff and policy makers (with which  
18  
19 388 awareness-raising activities for the general public may interact). Lastly, our focus on health behaviour  
20  
21  
22 389 and our 60-day recall period could introduce recall and social desirability biases. Most LMIC health  
23  
24 390 behaviour research uses 14-30-day recall periods; longer recall periods can lead to underrepresentation  
25  
26  
27 391 of lower educated groups [30]. However, for a survey of behaviour rather than of epidemiological  
28  
29 392 patterns, 14-day recall would have truncated the sample to an impractical size (omitting 540/964  
30  
31 393 [56.0%] of all responses) and neglected that illness episodes often extended beyond a fortnight (as was  
32  
33 394 the case for 91/964 [8.7%] of the recorded illnesses). In response, we conducted regular review  
34  
35 395 sessions with our survey team to identify and alleviate social desirability; we excluded chronic  
36  
37 396 illnesses; and our questionnaire asked our respondents to walk through the sequence of events, which  
38  
39  
40 397 improves recall [31]. While we cannot rule out a residual risk of social desirability and recall bias, it  
41  
42  
43 398 is not clear *a priori* whether and how any remaining bias would affect our comparison of antibiotic  
44  
45 399 uses across different healthcare providers.

46

47

48 400 By virtue of being a representative rural survey in northern Thailand and southern Lao PDR, the  
49  
50 401 specific notions and behavioural patterns around antibiotic use are not generalisable beyond the study  
51  
52 402 context, although similar interpretations of antibiotics as "anti-inflammatory medicine" exist  
53  
54 403 elsewhere (e.g. in China) [32], and even the documented practice of using antibiotics in plant  
55  
56 404 cultivation has historical antecedents [33]. Other study findings like the widespread use of antibiotics  
57  
58 405 for external (and often allegedly "internal") wounds have few documented equivalents in other settings  
59  
60

1  
2  
3 406 and deserve further research. However, the findings of our study have a broader relevance insofar as  
4  
5  
6 407 they expose the complexity of local knowledge and its relationship to AMR-related behaviour. On the  
7  
8 408 one hand, our work underlines the challenges facing public awareness campaigns as the current  
9  
10 409 principal strategy to change AMR-related population behaviour. For example, if not mindful of the  
11  
12 410 local context, the slogan of the 2017 World Antibiotic Awareness Week to “use antibiotics wisely to  
13  
14  
15 411 combat rising drug resistance” could plausibly entail *increased* antibiotic use or the use of stronger  
16  
17 412 medicine if people understand drug resistance as stubbornness of patients or as a problem applying to  
18  
19 413 all types of medicines.

20  
21  
22 414 On the other hand, our study also demonstrated that the link between knowledge, attitudes, and  
23  
24 415 antibiotic-related behaviour may be weak in LMIC contexts. This disjunction is not new [5], but the  
25  
26  
27 416 counter-intuitive link between awareness, antibiotic-related attitudes, and antibiotic use from informal  
28  
29 417 sources suggests that AMR-related information can easily entail unintended consequences—  
30  
31 418 knowledge and awareness empower, but people themselves decide how they will use this new “power”  
32  
33  
34 419 in their daily lives [34]. For instance, villagers may not necessarily buy antibiotics from private clinics  
35  
36 420 and unregulated corner shops because of ignorance, but because they become more assertive about  
37  
38 421 their health (and increased wealth may enable patients to exercise this assertiveness).

39  
40  
41 422 Considering potential misunderstandings in AMR communication on the one hand and contextual  
42  
43 423 determinants of behaviour beyond knowledge deficits on the other, we call for an expansion of  
44  
45  
46 424 behavioural AMR strategies to address structural factors of behavioural change. For example,  
47  
48 425 vulnerability and adversity may drive people into seemingly irrational antimicrobial use [35]. A sick  
49  
50 426 labourer or factory worker may take antimicrobials desperately to maintain their job and to sustain  
51  
52  
53 427 their families, in which case it would be futile trying to convince them that their hardship is secondary  
54  
55 428 to the global health goal of tackling AMR. Yet, it may be possible to alleviate their pressure to consume  
56  
57 429 antimicrobials through paid sick leave and unemployment insurance. We propose the exploration of  
58  
59 430 such “AMR-sensitive interventions” to address upstream drivers of antimicrobial use and to  
60

1  
2  
3  
4  
5  
6  
7  
8  
9  
10  
11  
12  
13  
14  
15  
16  
17  
18  
19  
20  
21  
22  
23  
24  
25  
26  
27  
28  
29  
30  
31  
32  
33  
34  
35  
36  
37  
38  
39  
40  
41  
42  
43  
44  
45  
46  
47  
48  
49  
50  
51  
52  
53  
54  
55  
56  
57  
58  
59  
60

431 complement education and awareness campaigns—similar to nutrition-sensitive interventions that  
432 target the determinants of mal- and undernutrition through upstream interventions like social safety  
433 nets (rather than e.g. providing supplements directly to people) [36]. AMR-sensitive interventions  
434 require us to venture out of health policy terrain into broader development policy. There is yet little  
435 evidence whether and how such context-oriented approaches bear fruit. Greater involvement of the  
436 social sciences is necessary to uncover this gap and to find constructive solutions that address the social  
437 factors of which AMR is a symptom.

## 438 **ACKNOWLEDGEMENTS**

439 We thank our collaborators Caroline OH Jones, Romyen Kosaikanont, Pollavat Praphatong,  
440 Pathompong Manohan, Paul N Newton, Sommay Keomany, Penporn Warapikuptanun, Daranee  
441 Intralawan, Patchapoom U-Thong, Patipat Benjaroon, Narinnira Sangkham, Sirirat Chailert, Krittanon  
442 Promsutt, Maipheth Keovilayvanh, and Phaengnitta Phanthasomchit for guidance during the study  
443 design and for field survey implementation assistance. We further thank Ernest R Guevarra and Eric  
444 Ohuma for helpful discussions, feedback, and support during the survey design phase; Edward Gibbs,  
445 Lisa White, the Centre for Tropical Medicine and Global Health, the CABDyN Complexity Centre,  
446 and the Mahidol-Oxford Tropical Medicine Research Unit / Wellcome Trust Strategic Award for  
447 institutional support; Zoë Doran and the Clinical Trials Support Group at the Mahidol Oxford Tropical  
448 Medicine Research Unit for quality assurance during the protocol development process; Alison  
449 Brindle, Claire-Lise Kessler, and John Bleho for engaging communication work; and Karen Valentine,  
450 Holly Blades, and Kanchana Pongsaswat for indispensable operational and logistical assistance.

## 451 **AUTHOR CONTRIBUTIONS**

452 Study conceptualisation, design, and theoretical framing: MJH

1  
2  
3 453 Study design: MJH, NC, GZ, MM, FR-T, YL, HFLW, JL, TX, YKZ, AT, NS, NK, CP, SB, SV, KW,  
4  
5 454 PC-I, PT, TA, RCG, SN, TW, DL, EE, PA  
6  
7

8 455 Survey instrument development: MJH, GZ, NC  
9  
10

11 456 Study protocol development: MJH, NC  
12  
13

14 457 Data cleaning and coding: MJH, NC  
15  
16

17 458 Data analysis and manuscript draft: MJH  
18  
19

20 459 Manuscript review and approval: MJH, NC, GZ, MM, FR-T, YL, HFLW, JL, TX, YKZ, AT, NS, NK,  
21  
22 460 CP, SB, SV, KW, PC-I, PT, TA, RCG, SN, TW, DL, EE, PA  
23  
24  
25

## 26 461 **COMPETING INTERESTS** 27 28

29 462 We declare that no conflict of interest – financial or otherwise – exists.  
30  
31  
32

## 33 463 **DATA SHARING** 34 35

36 464 The data set will be made publicly available in June 2019 on the UK Data Service and equivalent  
37  
38 465 repositories in Thailand and Lao PDR.  
39  
40  
41  
42

## 43 466 **ETHICS APPROVAL** 44 45

46 467 The research was reviewed and approved by the University of Oxford Tropical Research Ethics  
47  
48 468 Committee (Ref. OxtREC 528-17), and it received local ethical approval in Thailand from the Mae  
49  
50 469 Fah Luang University Research Ethics Committee on Human Research (Ref. REH 60099), and in Lao  
51  
52 470 PDR from the National Ethics Committee for Health Research (Ref. NEHCR 074). Participation in the  
53  
54  
55 471 survey was voluntary and we obtained informed verbal consent from all participants, which was audio  
56  
57 472 recorded and documented by the survey field investigators with a written record of oral consent for  
58  
59 473 each participant.  
60

1  
2  
3  
4  
5  
6  
7  
8  
9  
10  
11  
12  
13  
14  
15  
16  
17  
18  
19  
20  
21  
22  
23  
24  
25  
26  
27  
28  
29  
30  
31  
32  
33  
34  
35  
36  
37  
38  
39  
40  
41  
42  
43  
44  
45  
46  
47  
48  
49  
50  
51  
52  
53  
54  
55  
56  
57  
58  
59  
60

## 474 **FUNDING SOURCES**

475 This project is funded by the Antimicrobial Resistance Cross Council Initiative supported by the seven  
476 research councils in partnership with the Department of Health and Department for Environment Food  
477 & Rural Affairs (grant ref. ES/P00511X/1, administered by the UK Economic and Social Research  
478 Council). YKZ was further supported by internal research placement funding by the MSc International  
479 Health and Tropical Medicine (University of Oxford). The funders had no involvement in the design  
480 and implementation of the project.

## 481 **REFERENCES**

- 482 1. FAO, OIE, WHO. Handle antimicrobials with care: Tripartite brochure [infographic]. Geneva:  
483 World Health Organization, 2017.
- 484 2. The Review on Antimicrobial Resistance. Tackling drug-resistant infections globally: final report  
485 and recommendations. London: The UK Prime Minister, 2016.
- 486 3. WHO. Global action plan on antimicrobial resistance. Geneva: World Health Organization, 2015.
- 487 4. MacDougall C, Polk RE. Antimicrobial stewardship programs in health care systems. *Clinical*  
488 *Microbiology Reviews* 2005;**18**(4):638-56 doi: 10.1128/CMR.18.4.638-656.2005.
- 489 5. Chandler CIR, Hutchinson E, Hutchison C. Addressing antimicrobial resistance through social  
490 theory: an anthropologically oriented report. London: London School of Hygiene & Tropical  
491 Medicine, 2016.
- 492 6. Cawley J, Ruhm CJ. The economics of risky health behaviors. In: Pauly MV, McGuire TG, Barros  
493 PP, eds. *Handbook of health economics*. Amsterdam: Elsevier, 2011:95-199.
- 494 7. Sheehy-Skeffington J, Rea J. How poverty affects people's decision-making processes. York:  
495 Joseph Rowntree Foundation, 2017.



- 1  
2  
3 496 8. Davis M, Whittaker A, Lindgren M, et al. Understanding media publics and the antimicrobial  
4  
5  
6 497 resistance crisis. *Global Public Health* 2017;**13**(9):1158-68 doi:  
7  
8 498 10.1080/17441692.2017.1336248.  
9  
10 499 9. Fynbo L, Jensen CS. Antimicrobial stigmatization: public health concerns about conventional pig  
11  
12 500 farming and pig farmers' experiences with stigmatization. *Social science & medicine*  
13  
14  
15 501 2018;**201**:1-8 doi: 10.1016/j.socscimed.2018.01.036.  
16  
17 502 10. Elsevier B.V. Scopus. Secondary Scopus 2018. <http://www.scopus.com/>.  
18  
19 503 11. Research Councils UK. Gateway to research. Secondary Gateway to research 2018.  
20  
21  
22 504 <http://gtr.rcuk.ac.uk/>.  
23  
24 505 12. Kinh NV, Wertheim HFL, Thwaites GE, et al. Developing an antimicrobial resistance reference  
25  
26 506 laboratory and surveillance programme in Vietnam. *The Lancet Global Health*  
27  
28  
29 507 2017;**5**(12):e1186-e87 doi: 10.1016/S2214-109X(17)30370-4.  
30  
31 508 13. GARDP. Business plan 2017-2023: developing new antibiotic treatments and ensuring sustainable  
32  
33 509 access for all. Geneva: Global Antibiotic Research and Development Partnership, 2017.  
34  
35 510 14. Paton J, Kresge N. Superbugs win another round as Big Pharma leaves antibiotics. Secondary  
36  
37  
38 511 Superbugs win another round as Big Pharma leaves antibiotics 2018.  
39  
40 512 [https://www.bloomberg.com/news/articles/2018-07-13/superbugs-win-another-round-as-big-](https://www.bloomberg.com/news/articles/2018-07-13/superbugs-win-another-round-as-big-pharma-leaves-antibiotics)  
41  
42 513 [pharma-leaves-antibiotics](https://www.bloomberg.com/news/articles/2018-07-13/superbugs-win-another-round-as-big-pharma-leaves-antibiotics).  
43  
44  
45 514 15. The Lancet. UK life science research: time to burst the biomedical bubble. *The Lancet*  
46  
47 515 2018;**392**(10143):187 doi: 10.1016/S0140-6736(18)31609-X.  
48  
49 516 16. Haenssger MJ, Charoenboon N, Zanello G, et al. Antibiotics and activity spaces: protocol of an  
50  
51  
52 517 exploratory study of behaviour, marginalisation, and knowledge diffusion. *BMJ Global Health*  
53  
54 518 2018;**3**(e000621) doi: 10.1136/bmjgh-2017-000621.  
55  
56  
57  
58  
59  
60

- 1  
2  
3 519 17. Holloway KA, Batmanabane G, Puri M, et al. Antibiotic use in South East Asia and policies to  
4  
5 promote appropriate use: reports from country situational analyses. *Bmj* 2017;**358**(Suppl1) doi:  
6 520  
7 10.1136/bmj.j2291.  
8 521  
9
- 10 522 18. Chereau F, Opatowski L, Tourdjman M, et al. Risk assessment for antibiotic resistance in South  
11  
12 East Asia. *Bmj* 2017;**358**(Suppl1) doi: 10.1136/bmj.j3393.  
13 523  
14
- 15 524 19. World Bank. World databank. Secondary World databank 2018.  
16  
17 <http://databank.worldbank.org/data/home.aspx>.  
18 17525
- 19 526 20. Public Health England. UK case of *Neisseria gonorrhoeae* with high-level resistance to  
20  
21 azithromycin and resistance to ceftriaxone acquired abroad. Health Protection Report  
22 527  
23 Advanced Access Report 2018;**12**(11).  
24 528  
25
- 26 529 21. Klein EY, Van Boeckel TP, Martinez EM, et al. Global increase and geographic convergence in  
27  
28 antibiotic consumption between 2000 and 2015. *Proceedings of the National Academy of*  
29 530  
30 *Sciences* 2018;**115**(15):E3463-E70 doi: 10.1073/pnas.1717295115.  
31 531  
32
- 33 532 22. Sumpradit N, Wongkongkathep S, Poonpolsup S, et al. New chapter in tackling antimicrobial  
34  
35 resistance in Thailand. *Bmj* 2017;**358**(Suppl1) doi: 10.1136/bmj.j2423.  
36 533  
37
- 38 534 23. Haenssger MJ. Satellite-aided survey sampling and implementation in low- and middle-income  
39  
40 contexts: a low-cost/low-tech alternative. *Emerging Themes in Epidemiology* 2015;**12**(20) doi:  
41  
42 10.1186/s12982-015-0041-8.  
43 536  
44
- 45 537 24. Wikimedia Commons. Locator map of Chiang Rai Province, Thailand, by NordNordWest; a map  
46  
47 of Laos with Salavan province highlighted, by Infernoapple. Secondary Locator map of Chiang  
48  
49 Rai Province, Thailand, by NordNordWest; a map of Laos with Salavan province highlighted,  
50  
51 by Infernoapple 2018. Wikimedia Commons Web pages:  
52 540  
53 [http://en.wikipedia.org/wiki/File:Gansu\\_in\\_China\\_\(%2Ball\\_claims\\_hatched\).svg](http://en.wikipedia.org/wiki/File:Gansu_in_China_(%2Ball_claims_hatched).svg) and  
54 541  
55 [https://commons.wikimedia.org/wiki/File:Rajasthan\\_in\\_India\\_\(claimed\\_and\\_disputed\\_hatched\).svg?uselang=en](https://commons.wikimedia.org/wiki/File:Rajasthan_in_India_(claimed_and_disputed_hatched).svg?uselang=en).  
56 542  
57  
58 543  
59  
60

- 1  
2  
3 544 25. Haenssge MJ, Charoenboon N, Althaus T, et al. The social role of C-reactive protein point-of-  
4 care testing to guide antibiotic prescription in Northern Thailand. *Social science & medicine*  
5 545 2018;**202**:1-12 doi: 10.1016/j.socscimed.2018.02.018.  
6  
7  
8 546  
9
- 10 547 26. Khine Zaw Y, Charoenboon N, Haenssge MJ, et al. A comparison of patients' local conceptions  
11 of illness and medicines in the context of C-reactive protein biomarker testing in Chiang Rai  
12 and Yangon. *American Journal of Tropical Medicine and Hygiene* 2018;**98**(6):1661-760 doi:  
13 548 10.4269/ajtmh.17-0906.  
14  
15 549  
16  
17 550  
18
- 19 551 27. Willis GB. The practice of cross-cultural cognitive interviewing. *Public Opinion Quarterly*  
20 2015;**79**(S1):359-95 doi: 10.1093/poq/nfu092.  
21  
22 552  
23
- 24 553 28. Chow GC. Tests of equality between sets of coefficients in two linear regressions. *Econometrica*  
25 1960;**28**(3):591-605 doi: 10.2307/1910133.  
26 554  
27
- 28 555 29. McCullough AR, Parekh S, Rathbone J, et al. A systematic review of the public's knowledge and  
29 beliefs about antibiotic resistance. *Journal of Antimicrobial Chemotherapy* 2016;**71**(1):27-33  
30 doi: 10.1093/jac/dkv310.  
31 556  
32
- 33 557 30. Das J, Hammer J, Sánchez-Paramo C. The impact of recall periods on reported morbidity and  
34 health seeking behavior. *Journal of Development Economics* 2012;**98**(1):76-88 doi:  
35 558 10.1016/j.jdeveco.2011.07.001.  
36  
37  
38 559  
39
- 40 560 31. Fowler FJ. *Improving survey questions: design and evaluation*. Thousand Oaks, CA: Sage, 1995.  
41  
42 561  
43
- 44 562 32. Yu M, Zhao G, Stålsby Lundborg C, et al. Knowledge, attitudes, and practices of parents in rural  
45 China on the use of antibiotics in children: a cross-sectional study. *BMC Infectious Diseases*  
46 2014;**14**(1):112 doi: 10.1186/1471-2334-14-112.  
47 563  
48  
49 564  
50
- 51 565 33. Kirchhelle C. *Pharming animals: a global history of antibiotics in food production (1935–2017)*.  
52 Palgrave Communications 2018;**4**(96) doi: 10.1057/s41599-018-0152-2.  
53  
54 566  
55  
56  
57  
58  
59  
60

1  
2  
3  
4  
5  
6  
7  
8  
9  
10  
11  
12  
13  
14  
15  
16  
17  
18  
19  
20  
21  
22  
23  
24  
25  
26  
27  
28  
29  
30  
31  
32  
33  
34  
35  
36  
37  
38  
39  
40  
41  
42  
43  
44  
45  
46  
47  
48  
49  
50  
51  
52  
53  
54  
55  
56  
57  
58  
59  
60

- 567 34. Carrion ML. "You need to do your research": vaccines, contestable science, and maternal  
epistemology. *Public Understanding of Science* 2018;**27**(3):310-24 doi:  
10.1177/0963662517728024.
- 570 35. Ribera JM, Hausmann-Muela S. The straw that breaks the camel's back: redirecting health-seeking  
behavior studies on malaria and vulnerability. *Medical Anthropology Quarterly*  
2011;**25**(1):103-21 doi: 10.1111/j.1548-1387.2010.01139.x.
- 573 36. Ruel MT, Alderman H, The Maternal and Child Nutrition Study Group. Nutrition-sensitive  
interventions and programmes: How can they help to accelerate progress in improving maternal  
and child nutrition? *The Lancet* 2013;**382**(9891):536-51 doi: 10.1016/S0140-6736(13)60843-  
0.

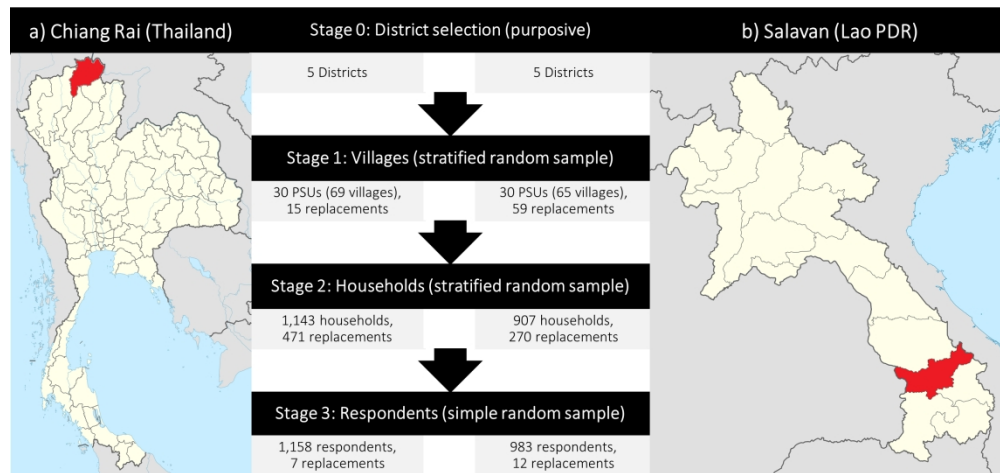

Survey sites and multi-stage sampling process. Source: Authors, adapted from Wikimedia Commons [22]. Notes: Unavailable selections at each sampling stage were substituted with a random replacement for the random samples of PSUs and household members, and with the nearest available neighbour for the interval sample of households. One PSU could contain more than one administrative village; if the first-chosen village contained less than 600 houses, then adjacent villages would be included. PSU=Primary Sampling Unit.

257x120mm (300 x 300 DPI)

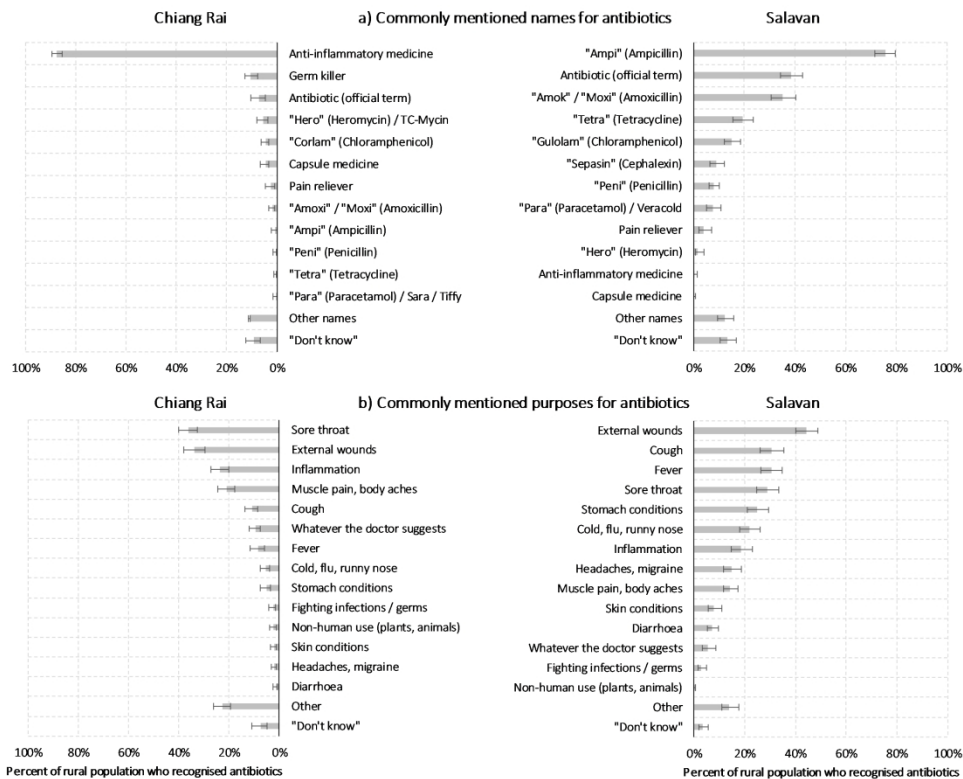

Common names and purposes for antibiotics. Source: Authors' analysis of survey data. Notes: Only including respondents who indicated that they had seen the presented medicine (i.e. common antibiotics) before. Chiang Rai: n = 1076; Salavan: n = 775. Population-weighted statistics, accounting for complex survey design. Multiple response permitted. Error bars indicate 95% confidence interval.

249x193mm (300 x 300 DPI)

1 **Appendix**

2 **Appendix Table 1. Provincial-level estimates of rural surveys in Chiang Rai and Salavan.**

|                                                                      | Chiang Rai        | Salavan           | X <sup>2</sup> / z-score |
|----------------------------------------------------------------------|-------------------|-------------------|--------------------------|
| <b>Demographics</b>                                                  |                   |                   |                          |
| Number                                                               | 1158              | 983               | ..                       |
| Female <sup>a</sup>                                                  | 51.3% (44.9–57.6) | 50.9% (47.0–54.9) | 0.01                     |
| Age <sup>a</sup>                                                     | 46 (13)           | 37 (20)           | 10.83***                 |
| Education (years)                                                    | 6.3 (4.5)         | 4.4 (5.5)         | 2.10**                   |
| Speaking Thai / Lao                                                  | 92.4% (89.9–94.2) | 93.6% (91.9–94.9) | 0.88                     |
| Wealth index                                                         | 0.7 (0.1)         | 0.4 (0.2)         | 13.12***                 |
| Buddhist religion                                                    | 81.9% (77.4–85.7) | 67.5% (61.7–72.9) | 16.85***                 |
| Thai/Lao nationality                                                 | 95.0% (93.1–96.4) | 98.8% (97.7–99.4) | 18.50***                 |
| Majority ethnic group (Thai/Lao Loum)                                | 65.2% (59.6–70.4) | 56.2% (49.9–62.2) | 4.73**                   |
| <b>Antibiotic knowledge / attitudes</b>                              |                   |                   |                          |
| Number                                                               | 1158              | 983               | ..                       |
| Aware of antibiotics                                                 | 95.7% (94.0–96.9) | 86.4% (83.6–88.7) | 41.47***                 |
| Aware of drug resistance <sup>b</sup>                                | 74.8% (71.1–78.2) | 62.5% (58.1–66.7) | 18.80***                 |
| Would not buy antibiotics over the counter                           | 57.0% (52.7–61.1) | 27.7% (24.6–31.0) | 115.03***                |
| Prefers antibiotics over alternatives                                | 61.8% (57.9–65.5) | 24.8% (21.1–29.0) | 151.35***                |
| Does not keep antibiotics for future use                             | 57.1% (53.1–61.0) | 16.2% (13.2–19.8) | 201.30***                |
| Knows that antibiotic resistance can spread                          | 9.1% (7.2–11.5)   | 3.4% (2.1–5.5)    | 15.09***                 |
| Answer score (0 to 4)                                                | 1.8 (0.9)         | 0.7 (1.0)         | 17.13***                 |
| <b>Illness episodes<sup>c</sup></b>                                  |                   |                   |                          |
| Number                                                               | 608               | 356               | ..                       |
| Self-rated severity (1=mild, 2=medium, 3=severe)                     | 1.6 (0.7)         | 1.8 (0.8)         | 2.43**                   |
| Duration of illness episode (days)                                   | 6.8 (7.1)         | 6.5 (7.9)         | 0.82                     |
| <b>Treatment-seeking behaviour<sup>c</sup></b>                       |                   |                   |                          |
| Number                                                               | 608               | 356               | ..                       |
| Public healthcare provider                                           | 29.0% (24.8–33.7) | 44.8% (37.8–52.0) | 14.17***                 |
| Private healthcare providers                                         | 25.0% (20.5–30.1) | 23.8% (17.8–31.0) | 0.08                     |
| Informal healthcare provider                                         | 8.5% (6.1–11.8)   | 6.9% (3.9–11.8)   | 0.45                     |
| Care from family or self-care                                        | 88.8% (84.3–92.2) | 93.2% (88.3–96.1) | 2.27                     |
| Other types of healthcare access                                     | 0.3% (0.1–1.4)    | 6.0% (2.8–12.3)   | 23.43***                 |
| <b>Medicine use episodes per illness<sup>c</sup></b>                 |                   |                   |                          |
| Number                                                               | 608               | 356               | ..                       |
| Medicine use episodes                                                | 2.2 (1.7)         | 2.5 (2.3)         | 1.96**                   |
| Non-antibiotic medicine use episodes                                 | 1.6 (1.2)         | 1.3 (1.4)         | 1.98**                   |
| Antibiotic use episodes                                              | 0.2 (0.5)         | 0.4 (0.7)         | 3.51***                  |
| Potential antibiotic use episodes                                    | 0.4 (0.9)         | 0.9 (1.8)         | 4.32***                  |
| Antibiotic use episodes per illness from public sources              | 0.1 (0.3)         | 0.1 (0.4)         | 0.78                     |
| Antibiotic use episodes per illness from private sources             | 0.1 (0.3)         | 0.2 (0.5)         | 1.65*                    |
| Antibiotic use episodes per illness from informal sources            | 0.0 (0.2)         | 0.1 (0.4)         | 1.69*                    |
| Antibiotic / potential antibiotic use episodes from public sources   | 0.3 (0.8)         | 0.3 (1.1)         | 0.57                     |
| Antibiotic / potential antibiotic use episodes from private sources  | 0.2 (0.6)         | 0.7 (1.5)         | 3.11***                  |
| Antibiotic / potential antibiotic use episodes from informal sources | 0.1 (0.3)         | 0.2 (0.7)         | 2.33**                   |

3 Source: Authors' analysis of survey data.

4 Notes: Population-weighted statistics, accounting for complex survey design. Not applicable categories indicated with “..” Group  
5 comparison using X<sup>2</sup> tests for binary and Wilcoxon rank-sum tests for non-normally distributed variables.

6 \*p < 0.1, \*\*p < 0.05, \*\*\*p < 0.01.

7 a. Due to population weighting, samples reflect the same sex and age profiles as the respective censuses.

8 b. Comparing Thai “due yah” with the combined Lao “due yah” and “lueng yah.”

9 c. Completed illnesses experienced by respondent or child under their supervision, excluding incomplete episodes.



## Supplemental Material

Figure A1. Trend of AMR-related social sciences and multidisciplinary publications, 1970–2017.

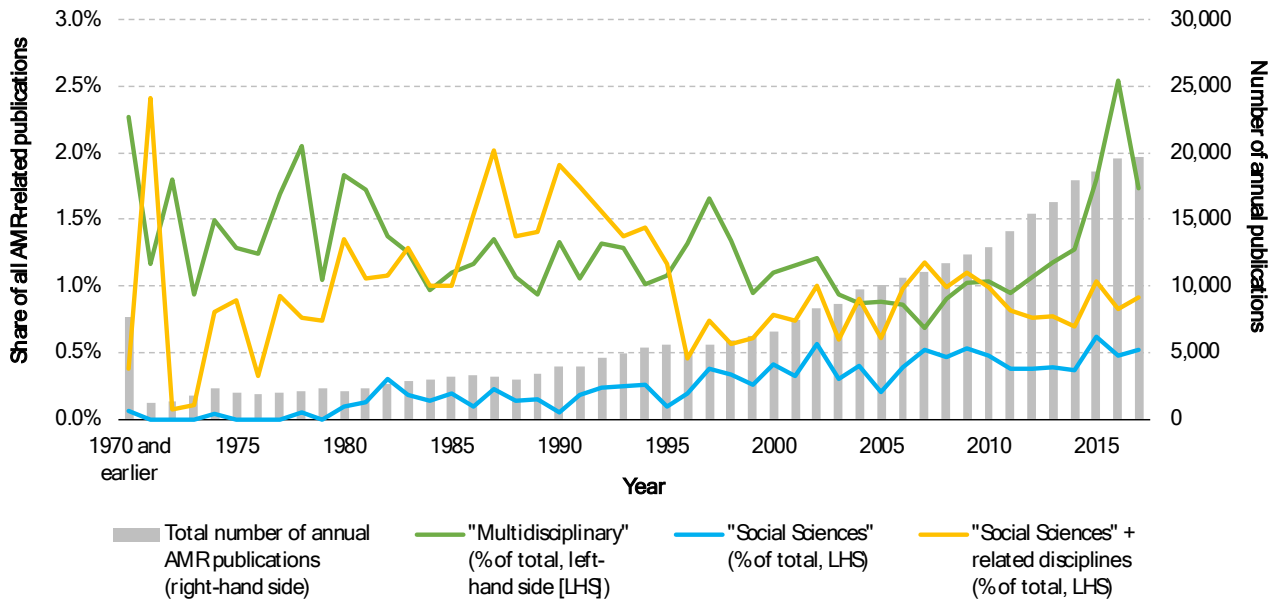

Source: Authors, based on Elsevier B.V. [15].

Notes: Data until 2018, as of 9 October 2018. Disciplines as reported by Scopus database, with “Social Sciences’ + related disciplines” providing upper bound of social science publications including Arts and Humanities;” “Business, Management and Accounting;” “Decision Sciences;” “Economics, Econometrics and Finance;” and “Psychology” alongside “Social Sciences.” Based on search query [TITLE-ABS-KEY (“antibiotic resistance” OR “drug resistance” OR “antimicrobial resistance” OR “AMR”)]. Total number of publications as of 9 October 2018 was 347,511, of which 66.0% arose from “Medicine;” 28.3% from “Biochemistry, Genetics and Molecular Biology;” and 18.2% from “Immunology and Microbiology” (multiple categories per publication possible.) “Social Sciences” average during the period was 0.4% (0.9% for “Social Sciences’ + related disciplines”). LHS=left-hand side.

12 Table A1. Variable descriptions.

|                                  | Variable                                    | Description                                                                                                                                                                                                                                                                                                                                                                                                                                                                                                                                                                     |
|----------------------------------|---------------------------------------------|---------------------------------------------------------------------------------------------------------------------------------------------------------------------------------------------------------------------------------------------------------------------------------------------------------------------------------------------------------------------------------------------------------------------------------------------------------------------------------------------------------------------------------------------------------------------------------|
| Demographic attributes           | Female                                      | Binary variable: Sex of respondent (R); [1] if female.                                                                                                                                                                                                                                                                                                                                                                                                                                                                                                                          |
|                                  | Age                                         | Continuous variable: Age in years.                                                                                                                                                                                                                                                                                                                                                                                                                                                                                                                                              |
|                                  | Education                                   | Continuous variable: Completed years of formal education.                                                                                                                                                                                                                                                                                                                                                                                                                                                                                                                       |
|                                  | Speaking Thai / Lao                         | Binary variable: [1] if R reported ability to communicate in main language (irrespective of reading and writing).                                                                                                                                                                                                                                                                                                                                                                                                                                                               |
|                                  | Wealth index                                | Continuous variable: Average of 17 household assets and amenities on scale from [0] to [1].                                                                                                                                                                                                                                                                                                                                                                                                                                                                                     |
|                                  | Buddhist religion                           | Binary variable: [1] if R belongs to the majority religion (Buddhism in both sites).                                                                                                                                                                                                                                                                                                                                                                                                                                                                                            |
|                                  | Thai/Lao nationality                        | Binary variable: [1] if R has Thai (Chiang Rai) or Lao (Salavan) nationality.                                                                                                                                                                                                                                                                                                                                                                                                                                                                                                   |
|                                  | Majority ethnic group                       | Binary variable: [1] if R belongs to the majority ethnic group Thai (Chiang Rai) or Lao Loum (Salavan).                                                                                                                                                                                                                                                                                                                                                                                                                                                                         |
| Antibiotic knowledge / attitudes | Aware of antibiotics                        | Binary variable: [1] if R recognised images of antibiotic capsules that are common in the field site and, if not, the most common translation of antibiotics as “anti-inflammatory drug” (“ยาแก้อักเสบ”) or “yah kae ak seb”) in Thai and “germ resister” (“ຍາຕໍ່ ງາດຊຸ້ ອ” or “yah dtan suea”) in Lao. Additional categorical variables (coded ex ante and ex post) recorded the names and purposes that the respondent reported following recognition of the medicine.                                                                                                        |
|                                  | Aware of drug resistance                    | Binary variable: [1] if R recognised the local terms for “drug resistance.” In Thai, “drug resistance” was translated as “ดื้อยา” (“due yah”). Lao has two translations of which “ດູ້ ຍາ” (“due yah”) is the formal term and “ລູ່ ງຸ່ຍາ” (“lueng yah”) is a more colloquial but broader expression (both translations were asked separately). Additional categorical variables (coded ex ante and ex post) recorded the interpretations of each term.                                                                                                                           |
|                                  | Would not buy antibiotics over the counter  | Binary variable: [1] if answer to question “Is there any situation for which you would buy this medicine?” corresponded to FAO/OIE/WHO message “When using antibiotics: follow professional advice” (field coded based on survey training manual) [1].                                                                                                                                                                                                                                                                                                                          |
|                                  | Prefers alternatives over antibiotics       | Binary variable: [1] if answer to question “Do you prefer other remedies such as herbs or cough syrup to this medicine for sore throat?” corresponded to FAO/OIE/WHO message “Ensure medicines are only used when necessary” (field coded) [1].                                                                                                                                                                                                                                                                                                                                 |
|                                  | Does not keep antibiotics for future use    | Binary variable: [1] if answer to question “If you were prescribed this medicine by a doctor and did not finish the course, would you keep it for future use?” corresponded to FAO/OIE/WHO message “When using antibiotics: never share medicines or use leftover drugs to treat a different illness” (field coded) [1].                                                                                                                                                                                                                                                        |
|                                  | Knows that antibiotic resistance can spread | Binary variable: [1] if answer to question “Can your ‘due yah’ (drug resistance) spread to other people, for example if you sneeze on them?” corresponded to FAO/OIE/WHO message “antimicrobial resistance can affect us all” (field coded) [1].                                                                                                                                                                                                                                                                                                                                |
|                                  | Answer score                                | Continuous variable: Number of preceding answers ([0] to [4]) corresponding to FAO/OIE/WHO material [1].                                                                                                                                                                                                                                                                                                                                                                                                                                                                        |
| Illness episodes                 | Self-rated severity                         | Ordinal variable: [1] if illness is reported as “mild;” [2] as “moderate;” [3] as “severe.”                                                                                                                                                                                                                                                                                                                                                                                                                                                                                     |
|                                  | Duration of illness episode                 | Continuous variable: Total duration of illness episode in days, calculated as sum of duration of individual steps in episode.                                                                                                                                                                                                                                                                                                                                                                                                                                                   |
| Treatment-seeking behaviour      | Public healthcare provider                  | Binary variable: [1] if R reported accessing health centre or hospital during illness episode.                                                                                                                                                                                                                                                                                                                                                                                                                                                                                  |
|                                  | Private healthcare provider                 | Binary variable: [1] if R reported accessing private clinic, hospital, or pharmacy.                                                                                                                                                                                                                                                                                                                                                                                                                                                                                             |
|                                  | Informal healthcare provider                | Binary variable: [1] if R reported accessing grocery store or traditional healer.                                                                                                                                                                                                                                                                                                                                                                                                                                                                                               |
|                                  | Care from family or self-care               | Binary variable: [1] if R reported self-treatment or care from family member or friend.                                                                                                                                                                                                                                                                                                                                                                                                                                                                                         |
|                                  | Other types of healthcare access            | Binary variable: [1] if R reported accessing other healthcare provider (e.g. village health volunteer).                                                                                                                                                                                                                                                                                                                                                                                                                                                                         |
|                                  | Medicines use episodes                      | Continuous variable: Number of reported medicine use episodes per illness, categorised into types of medicine (coded ex post into non-antibiotic medicine, antibiotics, and potential antibiotics) and sources of access (public, private, informal healthcare provider). Note that the actual amount of medicine used during each “medicine use episode” is likely to vary systematically across formal and informal healthcare providers, with “episodes” from the latter typically containing only a small number of pills and capsules for immediate treatment of symptoms. |

13 Source: Authors.

14 Table A2. Correlation matrixes of independent variables in regression models.

|                                             | Would not buy antibiotics over the counter | Prefers antibiotics over alternatives | Does not keep antibiotics for future use | Knows that antibiotic resistance can spread | Aware of antibiotics | Aware of drug resistance | Female   | Age      | Education (years) | Speaking Thai / Lao | Wealth index | Buddhist religion | Thai/Lao nationality | Majority ethnic group (Thai/Lao Loum) | Self-rated severity | Log of duration of illness episode (days) |
|---------------------------------------------|--------------------------------------------|---------------------------------------|------------------------------------------|---------------------------------------------|----------------------|--------------------------|----------|----------|-------------------|---------------------|--------------|-------------------|----------------------|---------------------------------------|---------------------|-------------------------------------------|
| <b>Chiang Rai</b>                           |                                            |                                       |                                          |                                             |                      |                          |          |          |                   |                     |              |                   |                      |                                       |                     |                                           |
| Would not buy antibiotics over the counter  | 1.00                                       |                                       |                                          |                                             |                      |                          |          |          |                   |                     |              |                   |                      |                                       |                     |                                           |
| Prefers antibiotics over alternatives       | 0.05                                       | 1.00                                  |                                          |                                             |                      |                          |          |          |                   |                     |              |                   |                      |                                       |                     |                                           |
| Does not keep antibiotics for future use    | 0.25***                                    | 0.16**                                | 1.00                                     |                                             |                      |                          |          |          |                   |                     |              |                   |                      |                                       |                     |                                           |
| Knows that antibiotic resistance can spread | 0.01                                       | -0.03                                 | 0.02                                     | 1.00                                        |                      |                          |          |          |                   |                     |              |                   |                      |                                       |                     |                                           |
| Aware of antibiotics                        | 0.03                                       | 0.05                                  | 0.00                                     | 0.07                                        | 1.00                 |                          |          |          |                   |                     |              |                   |                      |                                       |                     |                                           |
| Aware of drug resistance                    | -0.02                                      | 0.02                                  | -0.06                                    | 0.09                                        | 0.17***              | 1.00                     |          |          |                   |                     |              |                   |                      |                                       |                     |                                           |
| Female                                      | 0.13                                       | -0.02                                 | -0.02                                    | -0.02                                       | -0.03                | -0.01                    | 1.00     |          |                   |                     |              |                   |                      |                                       |                     |                                           |
| Age                                         | 0.00                                       | -0.03                                 | 0.10                                     | 0.03                                        | -0.09                | -0.11                    | -0.03    | 1.00     |                   |                     |              |                   |                      |                                       |                     |                                           |
| Education (years)                           | 0.02                                       | 0.10                                  | -0.01                                    | 0.03                                        | 0.13                 | 0.37***                  | -0.18*** | -0.50*** | 1.00              |                     |              |                   |                      |                                       |                     |                                           |
| Speaking Thai / Lao                         | 0.04                                       | 0.04                                  | 0.04                                     | 0.02                                        | 0.23***              | 0.32***                  | -0.06    | -0.08    | 0.26***           | 1.00                |              |                   |                      |                                       |                     |                                           |
| Wealth index                                | 0.05                                       | 0.09                                  | -0.03                                    | 0.04                                        | 0.07                 | 0.28***                  | -0.08    | 0.12     | 0.29***           | 0.33***             | 1.00         |                   |                      |                                       |                     |                                           |
| Buddhist religion                           | -0.04                                      | 0.02                                  | -0.03                                    | 0.08                                        | 0.02                 | 0.26***                  | 0.00     | 0.17***  | 0.19***           | 0.19***             | 0.27***      | 1.00              |                      |                                       |                     |                                           |
| Thai/Lao nationality                        | 0.04                                       | 0.03                                  | 0.01                                     | 0.04                                        | 0.12                 | 0.16**                   | -0.06    | 0.02     | 0.15**            | 0.32***             | 0.22***      | 0.24***           | 1.00                 |                                       |                     |                                           |
| Majority ethnic group (Thai/Lao Loum)       | -0.02                                      | 0.04                                  | 0.00                                     | 0.04                                        | 0.12                 | 0.33***                  | -0.03    | 0.21***  | 0.26***           | 0.32***             | 0.43***      | 0.59***           | 0.27***              | 1.00                                  |                     |                                           |
| Self-rated severity                         | 0.04                                       | 0.09                                  | 0.02                                     | -0.01                                       | 0.03                 | -0.01                    | 0.00     | -0.02    | -0.01             | -0.03               | -0.01        | -0.14*            | 0.05                 | -0.15**                               | 1.00                |                                           |
| Log of duration of illness episode (days)   | 0.02                                       | 0.06                                  | -0.03                                    | -0.04                                       | 0.03                 | 0.05                     | 0.09     | 0.04     | -0.07             | -0.04               | 0.00         | -0.02             | 0.02                 | -0.06                                 | 0.36***             | 1.00                                      |
| <b>Salavan</b>                              |                                            |                                       |                                          |                                             |                      |                          |          |          |                   |                     |              |                   |                      |                                       |                     |                                           |
| Would not buy antibiotics over the counter  | 1.00                                       |                                       |                                          |                                             |                      |                          |          |          |                   |                     |              |                   |                      |                                       |                     |                                           |
| Prefers antibiotics over alternatives       | -0.16                                      | 1.00                                  |                                          |                                             |                      |                          |          |          |                   |                     |              |                   |                      |                                       |                     |                                           |
| Does not keep antibiotics for future use    | -0.01                                      | 0.01                                  | 1.00                                     |                                             |                      |                          |          |          |                   |                     |              |                   |                      |                                       |                     |                                           |
| Knows that antibiotic resistance can spread | 0.00                                       | 0.03                                  | 0.10                                     | 1.00                                        |                      |                          |          |          |                   |                     |              |                   |                      |                                       |                     |                                           |
| Aware of antibiotics                        | -0.23***                                   | 0.04                                  | -0.07                                    | 0.01                                        | 1.00                 |                          |          |          |                   |                     |              |                   |                      |                                       |                     |                                           |
| Aware of drug resistance                    | -0.19**                                    | 0.13                                  | -0.03                                    | 0.14                                        | 0.30***              | 1.00                     |          |          |                   |                     |              |                   |                      |                                       |                     |                                           |
| Female                                      | -0.01                                      | -0.08                                 | 0.02                                     | 0.06                                        | -0.06                | 0.06                     | 1.00     |          |                   |                     |              |                   |                      |                                       |                     |                                           |
| Age                                         | -0.03                                      | 0.03                                  | 0.02                                     | 0.03                                        | 0.13                 | 0.15                     | -0.09    | 1.00     |                   |                     |              |                   |                      |                                       |                     |                                           |
| Education (years)                           | -0.13                                      | 0.13                                  | -0.02                                    | 0.14                                        | 0.20*                | 0.36***                  | -0.23*** | -0.19**  | 1.00              |                     |              |                   |                      |                                       |                     |                                           |
| Speaking Thai / Lao                         | -0.27***                                   | 0.15                                  | 0.03                                     | 0.01                                        | 0.26***              | 0.25***                  | -0.28*** | 0.11     | 0.34***           | 1.00                |              |                   |                      |                                       |                     |                                           |
| Wealth index                                | -0.33***                                   | 0.16                                  | 0.04                                     | -0.06                                       | 0.28***              | 0.38***                  | -0.02    | 0.08     | 0.40***           | 0.36***             | 1.00         |                   |                      |                                       |                     |                                           |
| Buddhist religion                           | -0.42***                                   | 0.17                                  | 0.02                                     | 0.00                                        | 0.29***              | 0.48***                  | 0.05     | 0.15     | 0.26***           | 0.44***             | 0.62***      | 1.00              |                      |                                       |                     |                                           |
| Thai/Lao nationality                        | 0.05                                       | -0.07                                 | 0.07                                     | 0.02                                        | -0.05                | -0.02                    | -0.02    | -0.19**  | 0.11              | -0.05               | -0.03        | -0.07             | 1.00                 |                                       |                     |                                           |
| Majority ethnic group (Thai/Lao Loum)       | -0.32***                                   | 0.16                                  | 0.03                                     | 0.03                                        | 0.30***              | 0.53***                  | 0.07     | 0.16     | 0.32***           | 0.36***             | 0.55***      | 0.76***           | 0.03                 | 1.00                                  |                     |                                           |
| Self-rated severity                         | 0.19**                                     | 0.02                                  | 0.07                                     | 0.01                                        | -0.12                | -0.02                    | 0.11     | -0.01    | -0.02             | -0.08               | -0.05        | -0.13             | 0.10                 | -0.08                                 | 1.00                |                                           |
| Log of duration of illness episode (days)   | 0.13                                       | 0.07                                  | 0.04                                     | 0.04                                        | -0.02                | -0.04                    | 0.11     | 0.07     | -0.08             | -0.07               | 0.02         | -0.05             | 0.10                 | -0.09                                 | 0.21***             | 1.00                                      |

15 Source: Authors' analysis of survey data.

16 Notes: Unweighted statistics.

17 \*p &lt; 0.1, \*\*p &lt; 0.05, \*\*\*p &lt; 0.01.

18 Table A3. Characteristics of individuals who received antibiotics from public, private, and informal  
19 sources.

|                                                    | Chiang Rai               |                           |                            | X <sup>2</sup> / z-score <sup>c</sup> |                |                | Salavan                  |                           |                            | X <sup>2</sup> / z-score <sup>c</sup> |                |                |
|----------------------------------------------------|--------------------------|---------------------------|----------------------------|---------------------------------------|----------------|----------------|--------------------------|---------------------------|----------------------------|---------------------------------------|----------------|----------------|
|                                                    | Public antibiotic access | Private antibiotic access | Informal antibiotic access | Publ. vs. priv.                       | Publ. vs. inf. | Priv. vs. inf. | Public antibiotic access | Private antibiotic access | Informal antibiotic access | Publ. vs. priv.                       | Publ. vs. inf. | Priv. vs. inf. |
| Number                                             | 93                       | 115                       | 35                         | 200                                   | 110            | 132            | 157                      | 38                        | 41                         | 179                                   | 178            | 77             |
| <b>Demographics</b>                                |                          |                           |                            |                                       |                |                |                          |                           |                            |                                       |                |                |
| Female                                             | 53.8%<br>(40.3–66.8)     | 59.6%<br>(46.6–71.4)      | 56.9%<br>(34.2–77.1)       | 0.54                                  | 0.11           | 0.05           | 71.5%<br>(63.8–78.2)     | 41.0%<br>(23.5–61.1)      | 71.8%<br>(51.2–86.1)       | 9.13***                               | 0.07           | 6.63**         |
| Age                                                | 43<br>(13)               | 48<br>(14)                | 40<br>(11)                 | 1.41                                  | 0.55           | 3.54***        | 35<br>(19)               | 33<br>(12)                | 39<br>(18)                 | 0.42                                  | 0.96           | 0.94           |
| Education (years)                                  | 6.2<br>(4.9)             | 5.8<br>(5.2)              | 8.0<br>(3.8)               | 0.30                                  | 1.18           | 2.14**         | 4.7<br>(6.3)             | 8.1<br>(5.9)              | 5.9<br>(5.5)               | 4.75***                               | 0.81           | 1.48           |
| Speaking Thai / Lao                                | 92.3%<br>(81.9–96.9)     | 85%<br>(73.7–92)          | 98%<br>(86.1–99.7)         | 2.04                                  | 1.50           | 4.63**         | 92.7%<br>(89.3–95.1)     | 100.0%<br>(100.0–100.0)   | 100.0%<br>(100.0–100.0)    | 7.80***                               | 4.96**         | ..             |
| Wealth index                                       | 0.6<br>(0.1)             | 0.7<br>(0.1)              | 0.7<br>(0.1)               | 2.42**                                | 3.48***        | 2.52**         | 0.4<br>(0.2)             | 0.5<br>(0.1)              | 0.5<br>(0.2)               | 3.86***                               | 0.86           | 1.27           |
| Buddhist religion                                  | 78.5%<br>(64.8–87.8)     | 77.2%<br>(63.9–86.6)      | 89.0%<br>(74.4–95.8)       | 0.03                                  | 1.44           | 2.14           | 66.5%<br>(58.3–73.8)     | 78.9%<br>(52.9–92.5)      | 79.2%<br>(58.9–91.0)       | 1.05                                  | 2.61           | <0.01          |
| Thai/Lao nationality                               | 97.1%<br>(89.8–99.2)     | 95.9%<br>(88.8–98.5)      | 98%<br>(86.1–99.7)         | 0.14                                  | 0.03           | 0.28           | 99%<br>(92.9–99.9)       | 100.0%<br>(100.0–100.0)   | 97.6%<br>(84.0–99.7)       | 0.38                                  | 0.66           | 24.41***       |
| Majority ethnic group (Thai/Lao Loum)              | 58.8%<br>(45.3–71.1)     | 64.6%<br>(52.3–75.3)      | 81.9%<br>(65.8–91.4)       | 0.60                                  | 7.36***        | 2.84*          | 58.6%<br>(48.9–67.7)     | 69.9%<br>(45.6–86.6)      | 68.2%<br>(44.4–85.2)       | 0.71                                  | 0.67           | 0.03           |
| <b>Antibiotic knowledge / attitudes</b>            |                          |                           |                            |                                       |                |                |                          |                           |                            |                                       |                |                |
| Aware of antibiotics                               | 97.5%<br>(90.4–99.4)     | 95.7%<br>(88.6–98.4)      | 93.3%<br>(64.5–99.1)       | 0.42                                  | 2.70           | 0.24           | 88.7%<br>(82.3–92.9)     | 92.7%<br>(72.2–98.4)      | 100.0%<br>(100.0–100.0)    | 1.21                                  | 5.50**         | 2.32           |
| Aware of drug resistance <sup>a</sup>              | 75.0%<br>(62.5–84.3)     | 76.5%<br>(64.9–85.1)      | 90.2%<br>(76.4–96.4)       | 0.06                                  | 3.35*          | 3.63*          | 66.3%<br>(57.8–73.8)     | 84.7%<br>(61.1–95.1)      | 79.5%<br>(61.3–90.5)       | 2.94*                                 | 2.22           | 0.18           |
| Links drug resistance to AMR concepts <sup>b</sup> | 1.7%<br>(0.3–9.5)        | 5.4%<br>(2.0–13.6)        | 1.3%<br>(0.2–9.0)          | 1.39                                  | 0.01           | 5.17**         | 4.4%<br>(2.0–9.3)        | 9.0%<br>(1.9–33.5)        | 13.4%<br>(5.6–28.7)        | 0.89                                  | 4.92**         | 0.27           |
| Would not buy antibiotics over the counter         | 62.0%<br>(48.2–74.1)     | 62.1%<br>(48.3–74.2)      | 42.0%<br>(22.0–65.0)       | <0.01                                 | 4.19**         | 4.44**         | 44.5%<br>(35.9–53.5)     | 18.3%<br>(9.3–32.7)       | 23.3%<br>(12.3–39.6)       | 13.92***                              | 24.99***       | 0.62           |
| Prefers antibiotics over alternatives              | 62.7%<br>(49.6–74.2)     | 50.2%<br>(36.8–63.6)      | 70.3%<br>(46.2–86.7)       | 2.48                                  | 1.17           | 3.21*          | 22.8%<br>(16.8–30.2)     | 33.7%<br>(19.5–51.7)      | 29.3%<br>(13.7–52.0)       | 2.52                                  | 0.37           | 0.36           |
| Does not keep antibiotics for future use           | 54.3%<br>(41.2–66.8)     | 53.9%<br>(41.7–65.6)      | 38.1%<br>(18.9–62.0)       | <0.01                                 | 0.88           | 3.35*          | 21.1%<br>(14.2–30.2)     | 14.0%<br>(4.6–35.4)       | 13.9%<br>(5.2–32.1)        | 0.52                                  | 2.07           | <0.01          |
| Knows that antibiotic resistance can spread        | 8.1%<br>(3.9–16.2)       | 10.9%<br>(5.7–19.9)       | 6.5%<br>(1.6–23.2)         | 0.51                                  | 0.25           | 0.53           | 1.9%<br>(0.5–6.6)        | 1.8%<br>(0.2–12.4)        | 0.0%<br>(0.0–0.0)          | <0.01                                 | 1.90           | 0.95           |
| Answer score (0 to 4)                              | 1.9<br>(0.9)             | 1.8<br>(0.9)              | 1.6<br>(0.8)               | 0.54                                  | 1.72*          | 1.05           | 0.9<br>(1.1)             | 0.7<br>(0.7)              | 0.7<br>(0.6)               | 1.86*                                 | 1.87*          | 0.05           |

20 Source: Authors' analysis of survey data.

21 Notes: Including antibiotics and unconfirmed medicines that may include antibiotics. Illness-level data, including only completed  
22 illnesses experienced by respondent or a child under their supervision. Population-weighted statistics, accounting for complex survey  
23 design. Multiple types of healthcare access per individual and illness episode possible.

24 a. Comparing Thai “due yah” with the combined Lao “due yah” and “lueng yah.”

25 b. Corresponding to interpretation of “drug resistance” as “Reference to antibiotics, drug-resistant germs” in Exhibit 6.

26 c. X<sup>2</sup> and Wilcoxon rank-sum tests, omitting simultaneous antibiotic access from more than one type of healthcare provider, which was  
27 the case in 82/958 [8.6%] of all pairwise comparisons of antibiotic access.

1  
2  
3  
4  
5  
6  
7  
8  
9  
10  
11  
12  
13  
14  
15  
16  
17  
18  
19  
20  
21  
22  
23  
24  
25  
26  
27  
28  
29  
30  
31  
32  
33  
34  
35  
36  
37  
38  
39  
40  
41  
42  
43  
44  
45  
46  
47  
48  
49  
50  
51  
52  
53  
54  
55  
56  
57  
58  
59  
60

| 1. Village Checklist (GPS coordinates of village and facilities) (to be completed by supervisor)                 |                                                  |                                                    |
|------------------------------------------------------------------------------------------------------------------|--------------------------------------------------|----------------------------------------------------|
| What kind of facility would you like to record?                                                                  |                                                  |                                                    |
| A. District Number                                                                                               |                                                  | [code entered automatically]                       |
| B. Village Number                                                                                                |                                                  | [code entered automatically]                       |
| C. Village centre                                                                                                | a) Latitude                                      | [coordinates entered automatically]                |
|                                                                                                                  | b) Longitude                                     | [coordinates entered automatically]                |
| D. Village head's house                                                                                          | a) Latitude                                      | [coordinates entered automatically]                |
|                                                                                                                  | b) Longitude                                     | [coordinates entered automatically]                |
| E. Local shop                                                                                                    | a) Latitude                                      | [coordinates entered automatically]                |
|                                                                                                                  | b) Longitude                                     | [coordinates entered automatically]                |
| F. Market                                                                                                        | a) Latitude                                      | [coordinates entered automatically]                |
|                                                                                                                  | b) Longitude                                     | [coordinates entered automatically]                |
| G. Temple                                                                                                        | a) Latitude                                      | [coordinates entered automatically]                |
|                                                                                                                  | b) Longitude                                     | [coordinates entered automatically]                |
| H. School                                                                                                        | a) Latitude                                      | [coordinates entered automatically]                |
|                                                                                                                  | b) Longitude                                     | [coordinates entered automatically]                |
| I. Bus stop                                                                                                      | a) Latitude                                      | [coordinates entered automatically]                |
|                                                                                                                  | b) Longitude                                     | [coordinates entered automatically]                |
| J. Health facility<br>Specify (public, private,<br>pharmacy, local store,<br>traditional healer, etc.):<br>_____ | a) Latitude                                      | [coordinates entered automatically]                |
|                                                                                                                  | b) Longitude                                     | [coordinates entered automatically]                |
|                                                                                                                  | c) Who is staffing the facility?                 | Total staff: ____<br>Staff at time of visit: _____ |
|                                                                                                                  | d) Does the provider have antibiotics available? | Yes ..... 1<br>No ..... 0                          |

Peer review only

| <b>Interview data [Record observation]</b>                                                                                                                                                                                                                                                                                                                                                                                                                                                                                            |                 |                                                                                                                                                                                                                                                                                                                                                                                                                                                         |                   |                                           |      |          |             |     |                                           |  |  |  |  |  |  |  |  |  |  |  |  |  |  |  |
|---------------------------------------------------------------------------------------------------------------------------------------------------------------------------------------------------------------------------------------------------------------------------------------------------------------------------------------------------------------------------------------------------------------------------------------------------------------------------------------------------------------------------------------|-----------------|---------------------------------------------------------------------------------------------------------------------------------------------------------------------------------------------------------------------------------------------------------------------------------------------------------------------------------------------------------------------------------------------------------------------------------------------------------|-------------------|-------------------------------------------|------|----------|-------------|-----|-------------------------------------------|--|--|--|--|--|--|--|--|--|--|--|--|--|--|--|
| i. District Number                                                                                                                                                                                                                                                                                                                                                                                                                                                                                                                    |                 | [code entered automatically]                                                                                                                                                                                                                                                                                                                                                                                                                            |                   |                                           |      |          |             |     |                                           |  |  |  |  |  |  |  |  |  |  |  |  |  |  |  |
| ii. PSU Number                                                                                                                                                                                                                                                                                                                                                                                                                                                                                                                        |                 | [code entered automatically]                                                                                                                                                                                                                                                                                                                                                                                                                            |                   |                                           |      |          |             |     |                                           |  |  |  |  |  |  |  |  |  |  |  |  |  |  |  |
| iii. Household number                                                                                                                                                                                                                                                                                                                                                                                                                                                                                                                 |                 | Number: _____                                                                                                                                                                                                                                                                                                                                                                                                                                           |                   |                                           |      |          |             |     |                                           |  |  |  |  |  |  |  |  |  |  |  |  |  |  |  |
| iv. Household coordinates                                                                                                                                                                                                                                                                                                                                                                                                                                                                                                             | a) Latitude     | [coordinates entered automatically]                                                                                                                                                                                                                                                                                                                                                                                                                     |                   |                                           |      |          |             |     |                                           |  |  |  |  |  |  |  |  |  |  |  |  |  |  |  |
|                                                                                                                                                                                                                                                                                                                                                                                                                                                                                                                                       | b) Longitude    | [coordinates entered automatically]                                                                                                                                                                                                                                                                                                                                                                                                                     |                   |                                           |      |          |             |     |                                           |  |  |  |  |  |  |  |  |  |  |  |  |  |  |  |
| v. What type is this house most similar to?                                                                                                                                                                                                                                                                                                                                                                                                                                                                                           |                 | <div style="display: flex; flex-direction: column; align-items: flex-start;"> <div style="margin-bottom: 10px;">1... </div> <div style="margin-bottom: 10px;">2... </div> <div>3... </div> </div> |                   |                                           |      |          |             |     |                                           |  |  |  |  |  |  |  |  |  |  |  |  |  |  |  |
| vi. Time of visit                                                                                                                                                                                                                                                                                                                                                                                                                                                                                                                     | a) First visit  | [time entered automatically]                                                                                                                                                                                                                                                                                                                                                                                                                            |                   |                                           |      |          |             |     |                                           |  |  |  |  |  |  |  |  |  |  |  |  |  |  |  |
|                                                                                                                                                                                                                                                                                                                                                                                                                                                                                                                                       | b) Second visit | [time entered automatically]                                                                                                                                                                                                                                                                                                                                                                                                                            |                   |                                           |      |          |             |     |                                           |  |  |  |  |  |  |  |  |  |  |  |  |  |  |  |
| <b>List all persons aged 18+ years in household</b>                                                                                                                                                                                                                                                                                                                                                                                                                                                                                   |                 |                                                                                                                                                                                                                                                                                                                                                                                                                                                         |                   |                                           |      |          |             |     |                                           |  |  |  |  |  |  |  |  |  |  |  |  |  |  |  |
| <p>Hello, I'm a researcher working for the Mahidol-Oxford Tropical Medicine Research Unit. We are interested in the lives and health behaviours of villagers across Thailand and Lao PDR. We are selecting participants randomly and would like to choose one or two members of your household. In order to choose and ask them to participate, could you please tell us who lives here? [provide PIS on request]</p> <p><b>[1 respondent per every 5 household members will be selected randomly from this list]</b></p>             |                 |                                                                                                                                                                                                                                                                                                                                                                                                                                                         |                   |                                           |      |          |             |     |                                           |  |  |  |  |  |  |  |  |  |  |  |  |  |  |  |
| <table border="1" style="width: 100%; border-collapse: collapse;"> <thead> <tr> <th style="width: 15%;">Name</th> <th style="width: 15%;">Nickname</th> <th style="width: 15%;">Sex (M / F)</th> <th style="width: 15%;">Age</th> <th style="width: 40%;">Available for interview today? (Yes / No)</th> </tr> </thead> <tbody> <tr><td> </td><td> </td><td> </td><td> </td><td> </td></tr> <tr><td> </td><td> </td><td> </td><td> </td><td> </td></tr> <tr><td> </td><td> </td><td> </td><td> </td><td> </td></tr> </tbody> </table> |                 |                                                                                                                                                                                                                                                                                                                                                                                                                                                         |                   |                                           | Name | Nickname | Sex (M / F) | Age | Available for interview today? (Yes / No) |  |  |  |  |  |  |  |  |  |  |  |  |  |  |  |
| Name                                                                                                                                                                                                                                                                                                                                                                                                                                                                                                                                  | Nickname        | Sex (M / F)                                                                                                                                                                                                                                                                                                                                                                                                                                             | Age               | Available for interview today? (Yes / No) |      |          |             |     |                                           |  |  |  |  |  |  |  |  |  |  |  |  |  |  |  |
|                                                                                                                                                                                                                                                                                                                                                                                                                                                                                                                                       |                 |                                                                                                                                                                                                                                                                                                                                                                                                                                                         |                   |                                           |      |          |             |     |                                           |  |  |  |  |  |  |  |  |  |  |  |  |  |  |  |
|                                                                                                                                                                                                                                                                                                                                                                                                                                                                                                                                       |                 |                                                                                                                                                                                                                                                                                                                                                                                                                                                         |                   |                                           |      |          |             |     |                                           |  |  |  |  |  |  |  |  |  |  |  |  |  |  |  |
|                                                                                                                                                                                                                                                                                                                                                                                                                                                                                                                                       |                 |                                                                                                                                                                                                                                                                                                                                                                                                                                                         |                   |                                           |      |          |             |     |                                           |  |  |  |  |  |  |  |  |  |  |  |  |  |  |  |
| <b>Statement of consent (Respondent will receive participant information sheet and verbal consent will be taken)</b>                                                                                                                                                                                                                                                                                                                                                                                                                  |                 |                                                                                                                                                                                                                                                                                                                                                                                                                                                         |                   |                                           |      |          |             |     |                                           |  |  |  |  |  |  |  |  |  |  |  |  |  |  |  |
| Thank you for participating. You will receive a small token of gratitude for your participation at the end of the interview.                                                                                                                                                                                                                                                                                                                                                                                                          |                 |                                                                                                                                                                                                                                                                                                                                                                                                                                                         |                   |                                           |      |          |             |     |                                           |  |  |  |  |  |  |  |  |  |  |  |  |  |  |  |
| vii. Date of interview                                                                                                                                                                                                                                                                                                                                                                                                                                                                                                                |                 | [date entered automatically]                                                                                                                                                                                                                                                                                                                                                                                                                            |                   |                                           |      |          |             |     |                                           |  |  |  |  |  |  |  |  |  |  |  |  |  |  |  |
| viii. Time of interview begin                                                                                                                                                                                                                                                                                                                                                                                                                                                                                                         |                 | [time entered automatically]                                                                                                                                                                                                                                                                                                                                                                                                                            |                   |                                           |      |          |             |     |                                           |  |  |  |  |  |  |  |  |  |  |  |  |  |  |  |
| ix. Respondent name                                                                                                                                                                                                                                                                                                                                                                                                                                                                                                                   |                 | Respondent name: _____                                                                                                                                                                                                                                                                                                                                                                                                                                  |                   |                                           |      |          |             |     |                                           |  |  |  |  |  |  |  |  |  |  |  |  |  |  |  |
| x. Interviewer code                                                                                                                                                                                                                                                                                                                                                                                                                                                                                                                   |                 | [code entered automatically]                                                                                                                                                                                                                                                                                                                                                                                                                            |                   |                                           |      |          |             |     |                                           |  |  |  |  |  |  |  |  |  |  |  |  |  |  |  |
| <b>Part I: Personal and Household Characteristics</b>                                                                                                                                                                                                                                                                                                                                                                                                                                                                                 |                 |                                                                                                                                                                                                                                                                                                                                                                                                                                                         |                   |                                           |      |          |             |     |                                           |  |  |  |  |  |  |  |  |  |  |  |  |  |  |  |
| Let us begin with a few questions about yourself and your household.                                                                                                                                                                                                                                                                                                                                                                                                                                                                  |                 |                                                                                                                                                                                                                                                                                                                                                                                                                                                         |                   |                                           |      |          |             |     |                                           |  |  |  |  |  |  |  |  |  |  |  |  |  |  |  |
| 1. [record as observed] Sex                                                                                                                                                                                                                                                                                                                                                                                                                                                                                                           |                 | Female..... 1<br>Male ..... 0                                                                                                                                                                                                                                                                                                                                                                                                                           |                   |                                           |      |          |             |     |                                           |  |  |  |  |  |  |  |  |  |  |  |  |  |  |  |
| 2. How old are you? [in years] [If respondent cannot give exact age, ask for approximate age and code in range: 18-24, 25-34, 35-44, 45-59, 60 and older]                                                                                                                                                                                                                                                                                                                                                                             |                 | Age in years: _____                                                                                                                                                                                                                                                                                                                                                                                                                                     |                   |                                           |      |          |             |     |                                           |  |  |  |  |  |  |  |  |  |  |  |  |  |  |  |
| 3. Please indicate what kind of work you do. If you have more than one occupation at one time or throughout the year, please begin with the one in which you spend the most time and name up to three. If you do not have an occupation, please also mention whether you are still a student, retired, or unemployed.                                                                                                                                                                                                                 |                 | a) Main occupation                                                                                                                                                                                                                                                                                                                                                                                                                                      | Occupation: _____ |                                           |      |          |             |     |                                           |  |  |  |  |  |  |  |  |  |  |  |  |  |  |  |
|                                                                                                                                                                                                                                                                                                                                                                                                                                                                                                                                       |                 | b) Side occupation                                                                                                                                                                                                                                                                                                                                                                                                                                      | Occupation: _____ |                                           |      |          |             |     |                                           |  |  |  |  |  |  |  |  |  |  |  |  |  |  |  |
|                                                                                                                                                                                                                                                                                                                                                                                                                                                                                                                                       |                 | c) Side occupation                                                                                                                                                                                                                                                                                                                                                                                                                                      | Occupation: _____ |                                           |      |          |             |     |                                           |  |  |  |  |  |  |  |  |  |  |  |  |  |  |  |
| 4. What is your mother tongue?                                                                                                                                                                                                                                                                                                                                                                                                                                                                                                        |                 | Mother tongue: _____                                                                                                                                                                                                                                                                                                                                                                                                                                    |                   |                                           |      |          |             |     |                                           |  |  |  |  |  |  |  |  |  |  |  |  |  |  |  |
| 5. [In Thailand:] Can you speak Thai? [In Laos:] Can you speak Lao?                                                                                                                                                                                                                                                                                                                                                                                                                                                                   |                 | Yes ..... 1<br>No ..... 0                                                                                                                                                                                                                                                                                                                                                                                                                               |                   |                                           |      |          |             |     |                                           |  |  |  |  |  |  |  |  |  |  |  |  |  |  |  |
| 6. What is the highest grade of schooling that you completed?<br>[excluding informal education and pre-school education such as nursery and kindergarten, but including grade school, high school, vocational training, tertiary education, etc.]                                                                                                                                                                                                                                                                                     |                 |                                                                                                                                                                                                                                                                                                                                                                                                                                                         |                   | Highest grade: ____                       |      |          |             |     |                                           |  |  |  |  |  |  |  |  |  |  |  |  |  |  |  |
| 7. Are you the head of your household?                                                                                                                                                                                                                                                                                                                                                                                                                                                                                                |                 |                                                                                                                                                                                                                                                                                                                                                                                                                                                         |                   | Yes ..... 1<br>No ..... 0                 |      |          |             |     |                                           |  |  |  |  |  |  |  |  |  |  |  |  |  |  |  |
| 7.1. [if no] What is the name of your household head?                                                                                                                                                                                                                                                                                                                                                                                                                                                                                 |                 |                                                                                                                                                                                                                                                                                                                                                                                                                                                         |                   | Name: _____                               |      |          |             |     |                                           |  |  |  |  |  |  |  |  |  |  |  |  |  |  |  |

|    |                                                                                                                                          |                                                                                                                        |                                                                                       |
|----|------------------------------------------------------------------------------------------------------------------------------------------|------------------------------------------------------------------------------------------------------------------------|---------------------------------------------------------------------------------------|
| 1  | 8. What is your current marital status?                                                                                                  | Never married.....                                                                                                     | 1                                                                                     |
| 2  |                                                                                                                                          | Currently married .....                                                                                                | 2                                                                                     |
| 3  |                                                                                                                                          | Cohabiting.....                                                                                                        | 3                                                                                     |
| 4  |                                                                                                                                          | Separated / divorced .....                                                                                             | 4                                                                                     |
| 5  |                                                                                                                                          | Widowed.....                                                                                                           | 5                                                                                     |
| 6  | 9. Are there any close family members of yours [children, spouse, siblings, parents] who live elsewhere? [select "no" if not applicable] | 9.1. Do your parents live outside of this village? [ <b>do not count parents-in-law</b> ]                              | At least 1 person outside village .... 1<br>All inside village / not applicable.... 0 |
| 7  |                                                                                                                                          | 9.2. Does your spouse live outside of this village?                                                                    | At least 1 person outside village .... 1<br>All inside village / not applicable.... 0 |
| 8  |                                                                                                                                          | 9.3. Do you have siblings who live outside of this village? [ <b>do not count brothers-in-law and sisters-in-law</b> ] | At least 1 person outside village .... 1<br>All inside village / not applicable.... 0 |
| 9  |                                                                                                                                          | 9.4. Do you have children who live outside of this village?                                                            | At least 1 person outside village .... 1<br>All inside village / not applicable.... 0 |
| 10 | <b>Part II: Social Networks [for network census villages only]</b>                                                                       |                                                                                                                        |                                                                                       |
| 11 | I will now ask you some questions about your interactions with other people within and outside of your village.                          |                                                                                                                        |                                                                                       |
| 12 | 10. [Round I of network survey only] Where do you spend most of your time interacting with other people from your village?               | a) Field: ____                                                                                                         |                                                                                       |
| 13 |                                                                                                                                          | b) Temple: ____                                                                                                        |                                                                                       |
| 14 |                                                                                                                                          | c) Local store: ____                                                                                                   |                                                                                       |
| 15 |                                                                                                                                          | d) Market: ____                                                                                                        |                                                                                       |
| 16 |                                                                                                                                          | e) Children's schools: ____                                                                                            |                                                                                       |
| 17 |                                                                                                                                          | f) Home: ____                                                                                                          |                                                                                       |
| 18 |                                                                                                                                          | g) Workplace: ____                                                                                                     |                                                                                       |
| 19 |                                                                                                                                          | h) Village event/s: ____                                                                                               |                                                                                       |
| 20 |                                                                                                                                          | i) Other site: ____                                                                                                    |                                                                                       |
| 21 |                                                                                                                                          |                                                                                                                        |                                                                                       |
| 22 |                                                                                                                                          |                                                                                                                        |                                                                                       |
| 23 |                                                                                                                                          |                                                                                                                        |                                                                                       |
| 24 |                                                                                                                                          |                                                                                                                        |                                                                                       |
| 25 |                                                                                                                                          |                                                                                                                        |                                                                                       |
| 26 |                                                                                                                                          |                                                                                                                        |                                                                                       |
| 27 |                                                                                                                                          |                                                                                                                        |                                                                                       |
| 28 |                                                                                                                                          |                                                                                                                        |                                                                                       |
| 29 |                                                                                                                                          |                                                                                                                        |                                                                                       |
| 30 |                                                                                                                                          |                                                                                                                        |                                                                                       |
| 31 |                                                                                                                                          |                                                                                                                        |                                                                                       |
| 32 |                                                                                                                                          |                                                                                                                        |                                                                                       |
| 33 |                                                                                                                                          |                                                                                                                        |                                                                                       |
| 34 |                                                                                                                                          |                                                                                                                        |                                                                                       |
| 35 |                                                                                                                                          |                                                                                                                        |                                                                                       |
| 36 |                                                                                                                                          |                                                                                                                        |                                                                                       |
| 37 |                                                                                                                                          |                                                                                                                        |                                                                                       |
| 38 |                                                                                                                                          |                                                                                                                        |                                                                                       |
| 39 |                                                                                                                                          |                                                                                                                        |                                                                                       |
| 40 |                                                                                                                                          |                                                                                                                        |                                                                                       |
| 41 |                                                                                                                                          |                                                                                                                        |                                                                                       |
| 42 |                                                                                                                                          |                                                                                                                        |                                                                                       |
| 43 |                                                                                                                                          |                                                                                                                        |                                                                                       |
| 44 |                                                                                                                                          |                                                                                                                        |                                                                                       |
| 45 |                                                                                                                                          |                                                                                                                        |                                                                                       |
| 46 |                                                                                                                                          |                                                                                                                        |                                                                                       |
| 47 |                                                                                                                                          |                                                                                                                        |                                                                                       |
| 48 |                                                                                                                                          |                                                                                                                        |                                                                                       |
| 49 |                                                                                                                                          |                                                                                                                        |                                                                                       |
| 50 |                                                                                                                                          |                                                                                                                        |                                                                                       |
| 51 |                                                                                                                                          |                                                                                                                        |                                                                                       |
| 52 |                                                                                                                                          |                                                                                                                        |                                                                                       |
| 53 |                                                                                                                                          |                                                                                                                        |                                                                                       |
| 54 |                                                                                                                                          |                                                                                                                        |                                                                                       |
| 55 |                                                                                                                                          |                                                                                                                        |                                                                                       |
| 56 |                                                                                                                                          |                                                                                                                        |                                                                                       |
| 57 |                                                                                                                                          |                                                                                                                        |                                                                                       |
| 58 |                                                                                                                                          |                                                                                                                        |                                                                                       |
| 59 |                                                                                                                                          |                                                                                                                        |                                                                                       |
| 60 |                                                                                                                                          |                                                                                                                        |                                                                                       |



OxTREC reference: 528-17

| 11. [Round I of network survey only] Outside your household, with whom do you interact on a regular basis? (May be anyone from both inside and outside of the village, and through any platform which might not require a face-to-face interaction) |                                        |                                                                                                                                                                                                             |                                    |                                                                    |                                                           |                                                                                                                                                                   |                                                                                       |                                                           |                                       |
|-----------------------------------------------------------------------------------------------------------------------------------------------------------------------------------------------------------------------------------------------------|----------------------------------------|-------------------------------------------------------------------------------------------------------------------------------------------------------------------------------------------------------------|------------------------------------|--------------------------------------------------------------------|-----------------------------------------------------------|-------------------------------------------------------------------------------------------------------------------------------------------------------------------|---------------------------------------------------------------------------------------|-----------------------------------------------------------|---------------------------------------|
|                                                                                                                                                                                                                                                     | a) What is the nickname of the person? | b) How is this person related to you?<br>[give examples if respondent is unsure about answer categories]                                                                                                    | c) What is the sex of this person? | d) Where does this person live?                                    | e) What is the name of the household head of this person? | f) How often do you interact with this person?                                                                                                                    | g) How do you interact with this person?<br>[Mark all that apply]                     | h) Do your conversations relate to health and well-being? |                                       |
| 11.1.<br>Contact 1                                                                                                                                                                                                                                  | Nickname _____<br>Name _____           | Spouse..... 1<br>Parent..... 2<br>Child ..... 3<br>Sibling..... 4<br>Other relative ..... 5<br>Neighbour ..... 6<br>Friend (if not neighbour)..... 7<br>Other villager ..... 8<br>Other (specify) _ ..... 9 | Female...1<br>Male .....0          | In village ..... 1<br>(specify: _____)<br><br>Outside village .. 2 | Name of household head<br>_____                           | Daily or more often .....4<br>Weekly or few times/week .....3<br>Monthly or few times/month ...2<br>Yearly or few times/year .....1<br>Less often or never .....0 | Face-to-face... 1<br>Voice call..... 2<br>Messenger ..... 3<br>Other (specify) _____4 | Yes ..... 1<br>No ..... 0                                 |                                       |
| 11.2.<br>Contact n                                                                                                                                                                                                                                  | Nickname<br>Name                       | 1 2 3 4 5 6 7 8 9                                                                                                                                                                                           | 1 0                                | 1 2                                                                | Name                                                      | 0 1 2 3 4                                                                                                                                                         | 1 2 3 4                                                                               | 1 0                                                       |                                       |
| 11a. [Round II of network survey only] When we last visited you, you told us that you interact regularly with [names]. Has anything changed since last time?                                                                                        |                                        |                                                                                                                                                                                                             |                                    | Yes .....1<br>No .....0                                            |                                                           |                                                                                                                                                                   |                                                                                       |                                                           | → [update social network question 11] |
| 11i. [Round I of network survey only] Is there anybody in your household with whom you talk about health and well-being? [Mark all that apply]                                                                                                      |                                        |                                                                                                                                                                                                             |                                    | [mark all names from household roster that apply]                  |                                                           |                                                                                                                                                                   |                                                                                       |                                                           |                                       |

|                                                                                                                                                                                                                                                                                                                                                                              |                                                                                                                                                                                                              |                                    |
|------------------------------------------------------------------------------------------------------------------------------------------------------------------------------------------------------------------------------------------------------------------------------------------------------------------------------------------------------------------------------|--------------------------------------------------------------------------------------------------------------------------------------------------------------------------------------------------------------|------------------------------------|
| [For network survey village respondents in Round 2]                                                                                                                                                                                                                                                                                                                          |                                                                                                                                                                                                              |                                    |
| 12. An education activity has recently taken place in your village.                                                                                                                                                                                                                                                                                                          |                                                                                                                                                                                                              |                                    |
| 12.1. Did you participate in any of the activities?                                                                                                                                                                                                                                                                                                                          | Yes .....                                                                                                                                                                                                    | 1                                  |
|                                                                                                                                                                                                                                                                                                                                                                              | Yes, but not throughout.....                                                                                                                                                                                 | 2                                  |
|                                                                                                                                                                                                                                                                                                                                                                              | No .....                                                                                                                                                                                                     | 3                                  |
|                                                                                                                                                                                                                                                                                                                                                                              | Don't know / prefer not to say .....                                                                                                                                                                         | 4                                  |
| 12.2. Did you talk with anybody about the activity in your village?<br>["Talking" can involve any conversation including asking for information, informing about the educational activity, or discussing it (regardless of actual attendance)]                                                                                                                               | a) Nickname 1: _____ b) Full name 1: _____ c) Relationship 1: 1 2 3 4 5 6 7<br>a) Nickname n: _____ b) Full name n: _____ c) Relationship n: 1 2 3 4 5 6 7<br>[Relationship codes]<br>Household member ..... | 1                                  |
|                                                                                                                                                                                                                                                                                                                                                                              | Family member outside HH.....                                                                                                                                                                                | 2                                  |
|                                                                                                                                                                                                                                                                                                                                                                              | Other relative .....                                                                                                                                                                                         | 3                                  |
|                                                                                                                                                                                                                                                                                                                                                                              | Neighbour.....                                                                                                                                                                                               | 4                                  |
|                                                                                                                                                                                                                                                                                                                                                                              | Friend other than neighbour.....                                                                                                                                                                             | 5                                  |
|                                                                                                                                                                                                                                                                                                                                                                              | Other villager.....                                                                                                                                                                                          | 6                                  |
|                                                                                                                                                                                                                                                                                                                                                                              | Other (specify) _ .....                                                                                                                                                                                      | 7                                  |
| [If respondent indicates conversation in Q 12.2]                                                                                                                                                                                                                                                                                                                             | Going to doctor when sick .....                                                                                                                                                                              | 1                                  |
| 12.3. What subjects did you talk about in respect to the activity?<br>[mark all that apply]                                                                                                                                                                                                                                                                                  | Anti-inflammatories/antibiotics .....                                                                                                                                                                        | 2                                  |
|                                                                                                                                                                                                                                                                                                                                                                              | Germs.....                                                                                                                                                                                                   | 3                                  |
|                                                                                                                                                                                                                                                                                                                                                                              | Using medicines correctly.....                                                                                                                                                                               | 4                                  |
|                                                                                                                                                                                                                                                                                                                                                                              | Activity in general.....                                                                                                                                                                                     | 5                                  |
|                                                                                                                                                                                                                                                                                                                                                                              | Games/awards.....                                                                                                                                                                                            | 6                                  |
|                                                                                                                                                                                                                                                                                                                                                                              | Song/Story/Play .....                                                                                                                                                                                        | 7                                  |
|                                                                                                                                                                                                                                                                                                                                                                              | Money/compensation.....                                                                                                                                                                                      | 8                                  |
|                                                                                                                                                                                                                                                                                                                                                                              | Other (specify) _____.....                                                                                                                                                                                   | 9                                  |
| <b>Part III: Healthcare Seeking</b> Thank you for this. Now we come to a part where I will ask you some questions about health and health providers around here.                                                                                                                                                                                                             |                                                                                                                                                                                                              |                                    |
| 13. I would now like to ask you about the sources of health advice and medicine or other treatment that are available to you. Please think about all the places where you can go to get advice, treatment, or drugs if you (or your children) are sick.<br><br>Do you consider the following providers when you (or your children) feel unwell?<br><br>[Mark all that apply] | 13.1. Drug dispensary, other local store selling medicine                                                                                                                                                    | Consultation .....                 |
|                                                                                                                                                                                                                                                                                                                                                                              |                                                                                                                                                                                                              | Medical advice.....                |
|                                                                                                                                                                                                                                                                                                                                                                              |                                                                                                                                                                                                              | Access to medicine.....            |
|                                                                                                                                                                                                                                                                                                                                                                              |                                                                                                                                                                                                              | Other reason(s) .....              |
|                                                                                                                                                                                                                                                                                                                                                                              |                                                                                                                                                                                                              | Don't consider this provider ..... |
|                                                                                                                                                                                                                                                                                                                                                                              |                                                                                                                                                                                                              | Don't know such a provider .....   |
|                                                                                                                                                                                                                                                                                                                                                                              |                                                                                                                                                                                                              | 13.2. Traditional healer           |
|                                                                                                                                                                                                                                                                                                                                                                              | Medical advice.....                                                                                                                                                                                          |                                    |
|                                                                                                                                                                                                                                                                                                                                                                              | Access to medicine.....                                                                                                                                                                                      |                                    |
|                                                                                                                                                                                                                                                                                                                                                                              | Other reason(s) .....                                                                                                                                                                                        |                                    |
|                                                                                                                                                                                                                                                                                                                                                                              | Don't consider this provider .....                                                                                                                                                                           |                                    |
|                                                                                                                                                                                                                                                                                                                                                                              | Don't know such a provider .....                                                                                                                                                                             |                                    |
|                                                                                                                                                                                                                                                                                                                                                                              | 13.3. Pharmacist                                                                                                                                                                                             | Consultation .....                 |
|                                                                                                                                                                                                                                                                                                                                                                              | Medical advice.....                                                                                                                                                                                          |                                    |
|                                                                                                                                                                                                                                                                                                                                                                              | Access to medicine.....                                                                                                                                                                                      |                                    |
|                                                                                                                                                                                                                                                                                                                                                                              | Other reason(s) .....                                                                                                                                                                                        |                                    |
|                                                                                                                                                                                                                                                                                                                                                                              | Don't consider this provider .....                                                                                                                                                                           |                                    |
|                                                                                                                                                                                                                                                                                                                                                                              | Don't know such a provider .....                                                                                                                                                                             |                                    |
|                                                                                                                                                                                                                                                                                                                                                                              | 13.4. Private clinic                                                                                                                                                                                         | Consultation .....                 |
|                                                                                                                                                                                                                                                                                                                                                                              | Medical advice.....                                                                                                                                                                                          |                                    |
|                                                                                                                                                                                                                                                                                                                                                                              | Access to medicine.....                                                                                                                                                                                      |                                    |
|                                                                                                                                                                                                                                                                                                                                                                              | Other reason(s) .....                                                                                                                                                                                        |                                    |
|                                                                                                                                                                                                                                                                                                                                                                              | Don't consider this provider .....                                                                                                                                                                           |                                    |
|                                                                                                                                                                                                                                                                                                                                                                              | Don't know such a provider .....                                                                                                                                                                             |                                    |
|                                                                                                                                                                                                                                                                                                                                                                              | 13.5. Private hospital                                                                                                                                                                                       | Consultation .....                 |
|                                                                                                                                                                                                                                                                                                                                                                              | Medical advice.....                                                                                                                                                                                          |                                    |
|                                                                                                                                                                                                                                                                                                                                                                              | Access to medicine.....                                                                                                                                                                                      |                                    |
|                                                                                                                                                                                                                                                                                                                                                                              | Other reason(s) .....                                                                                                                                                                                        |                                    |
|                                                                                                                                                                                                                                                                                                                                                                              | Don't consider this provider .....                                                                                                                                                                           |                                    |
|                                                                                                                                                                                                                                                                                                                                                                              | Don't know such a provider .....                                                                                                                                                                             |                                    |
|                                                                                                                                                                                                                                                                                                                                                                              | 13.6. Health volunteer                                                                                                                                                                                       | Consultation .....                 |
|                                                                                                                                                                                                                                                                                                                                                                              | Medical advice.....                                                                                                                                                                                          |                                    |
|                                                                                                                                                                                                                                                                                                                                                                              | Access to medicine.....                                                                                                                                                                                      |                                    |
|                                                                                                                                                                                                                                                                                                                                                                              | Other reason(s) .....                                                                                                                                                                                        |                                    |
|                                                                                                                                                                                                                                                                                                                                                                              | Don't consider this provider .....                                                                                                                                                                           |                                    |
|                                                                                                                                                                                                                                                                                                                                                                              | Don't know such a provider .....                                                                                                                                                                             |                                    |
|                                                                                                                                                                                                                                                                                                                                                                              | 13.7. Public primary care unit                                                                                                                                                                               | Consultation .....                 |
|                                                                                                                                                                                                                                                                                                                                                                              | Medical advice.....                                                                                                                                                                                          |                                    |
|                                                                                                                                                                                                                                                                                                                                                                              | Access to medicine.....                                                                                                                                                                                      |                                    |
|                                                                                                                                                                                                                                                                                                                                                                              | Other reason(s) .....                                                                                                                                                                                        |                                    |
|                                                                                                                                                                                                                                                                                                                                                                              | Don't consider this provider .....                                                                                                                                                                           |                                    |
|                                                                                                                                                                                                                                                                                                                                                                              | Don't know such a provider .....                                                                                                                                                                             |                                    |

|  |                                                             |                                                                                                                                                                                       |
|--|-------------------------------------------------------------|---------------------------------------------------------------------------------------------------------------------------------------------------------------------------------------|
|  | <b>13.8.</b> Public hospital                                | Consultation ..... 1<br>Medical advice..... 2<br>Access to medicine..... 3<br>Other reason(s) ..... 4<br>Don't consider this provider ..... 98<br>Don't know such a provider ..... 99 |
|  | <b>13.9.</b> Other providers or Internet? Specify:<br>_____ | Consultation ..... 1<br>Medical advice..... 2<br>Access to medicine..... 3<br>Other reason(s) ..... 4<br>Don't consider this provider ..... 98<br>Don't know such a provider ..... 99 |

1  
2  
3  
4  
5  
6  
7  
8  
9  
10  
11  
12  
13  
14  
15  
16  
17  
18  
19  
20  
21  
22  
23  
24  
25  
26  
27  
28  
29  
30  
31  
32  
33  
34  
35  
36  
37  
38  
39  
40  
41  
42  
43  
44  
45  
46  
47  
48  
49  
50  
51  
52  
53  
54  
55  
56  
57  
58  
59  
60

For peer review only

| 14. Now if you think again, is there anyone else with whom you talk about health? |                                        |                                         |                                                                                                                                                                                                              |                                    |                                                                    |                                                           |                                                                                                                                                                   |                                                                                           |
|-----------------------------------------------------------------------------------|----------------------------------------|-----------------------------------------|--------------------------------------------------------------------------------------------------------------------------------------------------------------------------------------------------------------|------------------------------------|--------------------------------------------------------------------|-----------------------------------------------------------|-------------------------------------------------------------------------------------------------------------------------------------------------------------------|-------------------------------------------------------------------------------------------|
|                                                                                   | a) What is the nickname of the person? | b) What is the full name of the person? | c) How is this person related to you?<br>[give examples if respondent is unsure about answer categories]                                                                                                     | d) What is the sex of this person? | e) Where does this person live?                                    | f) What is the name of the household head of this person? | g) How often do you interact with this person?                                                                                                                    | h) How do you interact with this person?<br><br>[Mark all that apply]                     |
| 14.1.<br>Contact 1                                                                | Name _____                             | Name _____                              | Spouse..... 1<br>Parent ..... 2<br>Child ..... 3<br>Sibling..... 4<br>Other relative ..... 5<br>Neighbour ..... 6<br>Friend (if not neighbour)..... 7<br>Other villager ..... 8<br>Other (specify) _ ..... 9 | Female ..1<br>Male .....0          | In village ..... 1<br>(specify: _____)<br><br>Outside village .. 2 | Name of household head<br>_____                           | Daily or more often .....4<br>Weekly or few times/week .....3<br>Monthly or few times/month ...2<br>Yearly or few times/year .....1<br>Less often or never .....0 | Face-to-face..... 1<br>Voice call ..... 2<br>Messenger ..... 3<br>Other (specify) _____ 4 |
| 14.2.<br>Contact n                                                                | Name                                   | Name                                    | 1 2 3 4 5 6 7 8 9                                                                                                                                                                                            | 1 0                                | 1 2                                                                | Name                                                      | 0 1 2 3 4                                                                                                                                                         | 1 2 3 4                                                                                   |

review only

|                                                                                                                                                                                                                                                                                                                                                                                                                             |                                                                                                                                                                           |                                                                                                                                                                                                                                                                                                                                                                                                                                        |
|-----------------------------------------------------------------------------------------------------------------------------------------------------------------------------------------------------------------------------------------------------------------------------------------------------------------------------------------------------------------------------------------------------------------------------|---------------------------------------------------------------------------------------------------------------------------------------------------------------------------|----------------------------------------------------------------------------------------------------------------------------------------------------------------------------------------------------------------------------------------------------------------------------------------------------------------------------------------------------------------------------------------------------------------------------------------|
| <p>15. Did you or a child in your household have an acute illness (not a chronic, long-term condition that comes again and again) or an accident in the last two months? If yes, I will ask you about these illnesses one-by-one. <b>[if no, continue with Question 19]</b></p>                                                                                                                                             |                                                                                                                                                                           | No.....0 → [Q 16]<br>Yes.....1 ↓                                                                                                                                                                                                                                                                                                                                                                                                       |
| <p><b>[if yes:]</b><br/>                 15.a [Confirm if this episode is for respondent or child]</p>                                                                                                                                                                                                                                                                                                                      |                                                                                                                                                                           | Respondent .....1 → [Q 15.1]<br>Child .....2                                                                                                                                                                                                                                                                                                                                                                                           |
| <p>15.b How old is the child?</p>                                                                                                                                                                                                                                                                                                                                                                                           |                                                                                                                                                                           | Age in years: _____                                                                                                                                                                                                                                                                                                                                                                                                                    |
| <p>15.c Is the child female or male</p>                                                                                                                                                                                                                                                                                                                                                                                     |                                                                                                                                                                           | Female .....1<br>Male .....0                                                                                                                                                                                                                                                                                                                                                                                                           |
| <p>15.1. Can you please describe the symptoms or problem in your own words?</p>                                                                                                                                                                                                                                                                                                                                             |                                                                                                                                                                           | Description of condition: _____                                                                                                                                                                                                                                                                                                                                                                                                        |
| <p>15.2. Did [you / the child] receive a diagnosis of the illness from any medical provide, friend, or internet source?<br/><br/>                 If so, can you please describe the diagnosis of the illness if you received any and where [you / the child] received it? <b>[note: the diagnosis might be given by any medical provider including untrained and informal. Record all diagnoses if more than one.]</b></p> |                                                                                                                                                                           | a) Diagnosis 1: _____ b) Medical provider 1: 1 2 3 4 5 6 7 8<br>a) Diagnosis n: _____ b) Medical provider n: 1 2 3 4 5 6 7 8<br><br><b>[Response codes]</b><br>Drug dispensary, other local store selling medicine .....1<br>Traditional healer.....2<br>Pharmacist .....3<br>Private clinic.....4<br>Private hospital.....5<br>Primary care unit .....6<br>Public hospital.....7<br>Other providers or Internet? Specify: _____.....8 |
| <p>15.3. When did [you / the child] experience the accident/discomfort (for the first time)</p>                                                                                                                                                                                                                                                                                                                             |                                                                                                                                                                           | Onset: ___ days / ___ weeks / ___ months ago                                                                                                                                                                                                                                                                                                                                                                                           |
| <p>15.4. Would you describe the illness/accident as “mild,” “moderate,” or “severe”?</p>                                                                                                                                                                                                                                                                                                                                    |                                                                                                                                                                           | Mild.....1<br>Moderate.....2<br>Severe.....3                                                                                                                                                                                                                                                                                                                                                                                           |
| <p>15.5. Can you please explain the stages of the treatment? I will ask you step-by-step what you did, starting from the moment [you / the child] first experienced a discomfort.</p>                                                                                                                                                                                                                                       |                                                                                                                                                                           |                                                                                                                                                                                                                                                                                                                                                                                                                                        |
| <p><b>15.5.1. Step 1 (detection)</b></p>                                                                                                                                                                                                                                                                                                                                                                                    |                                                                                                                                                                           | Step n                                                                                                                                                                                                                                                                                                                                                                                                                                 |
| <p>a) What kind of help or treatment did you get at this stage? <b>[if unsure, specify]</b></p>                                                                                                                                                                                                                                                                                                                             | Ignored /did nothing .....1                                                                                                                                               | 1                                                                                                                                                                                                                                                                                                                                                                                                                                      |
|                                                                                                                                                                                                                                                                                                                                                                                                                             | Self-care (sleep, rest, medicine at home) .....2                                                                                                                          | 2                                                                                                                                                                                                                                                                                                                                                                                                                                      |
|                                                                                                                                                                                                                                                                                                                                                                                                                             | Care from family and friends (full-time).....3                                                                                                                            | 3                                                                                                                                                                                                                                                                                                                                                                                                                                      |
|                                                                                                                                                                                                                                                                                                                                                                                                                             | Treated/consulted at a traditional healer .....4                                                                                                                          | 4                                                                                                                                                                                                                                                                                                                                                                                                                                      |
|                                                                                                                                                                                                                                                                                                                                                                                                                             | Treated/cons. at a pharmacist.....5                                                                                                                                       | 5                                                                                                                                                                                                                                                                                                                                                                                                                                      |
|                                                                                                                                                                                                                                                                                                                                                                                                                             | Treated/cons. at shop selling drugs.....6                                                                                                                                 | 6                                                                                                                                                                                                                                                                                                                                                                                                                                      |
|                                                                                                                                                                                                                                                                                                                                                                                                                             | Treated/cons. at priv. clinic/hospital.....7                                                                                                                              | 7                                                                                                                                                                                                                                                                                                                                                                                                                                      |
|                                                                                                                                                                                                                                                                                                                                                                                                                             | Treated/cons. at primary care unit.....8                                                                                                                                  | 8                                                                                                                                                                                                                                                                                                                                                                                                                                      |
|                                                                                                                                                                                                                                                                                                                                                                                                                             | Treated/cons. at a gvt. Hospital.....9                                                                                                                                    | 9                                                                                                                                                                                                                                                                                                                                                                                                                                      |
|                                                                                                                                                                                                                                                                                                                                                                                                                             | Other (specify) _____.....10                                                                                                                                              | 10                                                                                                                                                                                                                                                                                                                                                                                                                                     |
| <p>b) Where did this activity take place?</p>                                                                                                                                                                                                                                                                                                                                                                               | At home .....1                                                                                                                                                            | 1                                                                                                                                                                                                                                                                                                                                                                                                                                      |
|                                                                                                                                                                                                                                                                                                                                                                                                                             | Less than 10 min. from home.....2                                                                                                                                         | 2                                                                                                                                                                                                                                                                                                                                                                                                                                      |
|                                                                                                                                                                                                                                                                                                                                                                                                                             | 10 to 29 min. ....3                                                                                                                                                       | 3                                                                                                                                                                                                                                                                                                                                                                                                                                      |
|                                                                                                                                                                                                                                                                                                                                                                                                                             | 30 to 59 min. ....4                                                                                                                                                       | 4                                                                                                                                                                                                                                                                                                                                                                                                                                      |
|                                                                                                                                                                                                                                                                                                                                                                                                                             | 60 to 119 min. ....5                                                                                                                                                      | 5                                                                                                                                                                                                                                                                                                                                                                                                                                      |
|                                                                                                                                                                                                                                                                                                                                                                                                                             | 2 hours or more from home.....6                                                                                                                                           | 6                                                                                                                                                                                                                                                                                                                                                                                                                                      |
| <p>c) How did [you / the child] get to the place of the activity? <b>[select “at home” according to prior responses]</b></p>                                                                                                                                                                                                                                                                                                | At home .....1                                                                                                                                                            | 1                                                                                                                                                                                                                                                                                                                                                                                                                                      |
|                                                                                                                                                                                                                                                                                                                                                                                                                             | Walk .....2                                                                                                                                                               | 2                                                                                                                                                                                                                                                                                                                                                                                                                                      |
|                                                                                                                                                                                                                                                                                                                                                                                                                             | Own bicycle .....3                                                                                                                                                        | 3                                                                                                                                                                                                                                                                                                                                                                                                                                      |
|                                                                                                                                                                                                                                                                                                                                                                                                                             | Own motorcycle / Three-wheeler.....4                                                                                                                                      | 4                                                                                                                                                                                                                                                                                                                                                                                                                                      |
|                                                                                                                                                                                                                                                                                                                                                                                                                             | Own car / four-wheeler .....5                                                                                                                                             | 5                                                                                                                                                                                                                                                                                                                                                                                                                                      |
|                                                                                                                                                                                                                                                                                                                                                                                                                             | Taxi or other hired ride.....6                                                                                                                                            | 6                                                                                                                                                                                                                                                                                                                                                                                                                                      |
|                                                                                                                                                                                                                                                                                                                                                                                                                             | Public transport.....7                                                                                                                                                    | 7                                                                                                                                                                                                                                                                                                                                                                                                                                      |
|                                                                                                                                                                                                                                                                                                                                                                                                                             | Other (specify) ___ .....8                                                                                                                                                | 8                                                                                                                                                                                                                                                                                                                                                                                                                                      |
| <p>d) How long did this stage last? <b>[let respondent choose category; if &lt;1 day, code “1” day]</b></p>                                                                                                                                                                                                                                                                                                                 | Duration: _____                                                                                                                                                           | ___ days<br>___ weeks<br>___ months                                                                                                                                                                                                                                                                                                                                                                                                    |
|                                                                                                                                                                                                                                                                                                                                                                                                                             |                                                                                                                                                                           | ___ days<br>___ weeks<br>___ months                                                                                                                                                                                                                                                                                                                                                                                                    |
| <p>e) Can you please name or describe all the medicines that you received or were prescribed during this step?<br/><br/> <b>[include medicine stored at home if “self-care at home”] [continue for all medicines received, then complete Questions g to k for each medicine individually]</b></p>                                                                                                                           |  Medicine 1:<br>Name/description: _____<br><br>Medicine n:<br>Name/description: _____ | Medicine 1<br><br>Medicine n                                                                                                                                                                                                                                                                                                                                                                                                           |
|                                                                                                                                                                                                                                                                                                                                                                                                                             |                                                                                                                                                                           | <p>f) For how long did [you / the child] take the medicine? <b>[let respondent choose category; if more than one repeated episode, indicate total duration] [for each medicine individually]</b></p>                                                                                                                                                                                                                                   |
|                                                                                                                                                                                                                                                                                                                                                                                                                             | ___ days<br>___ weeks<br>___ months                                                                                                                                       |                                                                                                                                                                                                                                                                                                                                                                                                                                        |

|                                                                                                                                                                                          |                                    |                                                                                                                                                                                                                                                                                                                                                                                                                             |                                                                                                                                                                                                                                                                                                                                                                                                                             |
|------------------------------------------------------------------------------------------------------------------------------------------------------------------------------------------|------------------------------------|-----------------------------------------------------------------------------------------------------------------------------------------------------------------------------------------------------------------------------------------------------------------------------------------------------------------------------------------------------------------------------------------------------------------------------|-----------------------------------------------------------------------------------------------------------------------------------------------------------------------------------------------------------------------------------------------------------------------------------------------------------------------------------------------------------------------------------------------------------------------------|
| g) How often per day did [you / the child] take the medicine?<br><i>[calculate into daily use according to respondent's chosen frequency]</i><br><i>[for each medicine individually]</i> |                                    | Frequency: ___ times daily                                                                                                                                                                                                                                                                                                                                                                                                  | ___ times daily                                                                                                                                                                                                                                                                                                                                                                                                             |
| h) What dosage did [you / the child] normally take?<br><i>[let respondent choose category according to type of medicine]</i><br><i>[for each medicine individually]</i>                  |                                    | Dosage<br>___ tablets / capsules<br>___ drops (for liquid medicine)<br>___ spoons (for liquid medicine)<br>___ shots/injections (for intravenous medicine)<br>per time administered                                                                                                                                                                                                                                         | ___ tablets<br>___ drops<br>___ spoons<br>___ shots                                                                                                                                                                                                                                                                                                                                                                         |
| i) Did [you / the child] take the medicine exactly as it was recommended to you by the person who prescribed/sold them<br><i>[for each medicine individually]</i>                        |                                    | Yes ..... 1<br>No ..... 0<br>Did not receive advice ..... 9<br>Don't know ..... 99                                                                                                                                                                                                                                                                                                                                          | 1<br>2<br>9<br>99                                                                                                                                                                                                                                                                                                                                                                                                           |
| j) Did [you / the child] finish the medicine?<br><i>[for each medicine individually]</i>                                                                                                 |                                    | Yes ..... 1<br>No ..... 0                                                                                                                                                                                                                                                                                                                                                                                                   | 1<br>0                                                                                                                                                                                                                                                                                                                                                                                                                      |
| k) Did you or anybody else use a mobile phone during this stage in connection with your condition? <i>[if no, go to next step]</i>                                                       |                                    | Yes ..... 1<br>No ..... 0 → <i>[next step]</i>                                                                                                                                                                                                                                                                                                                                                                              | 1<br>0                                                                                                                                                                                                                                                                                                                                                                                                                      |
| l) What was the purpose of using the mobile phone?<br><i>[Mark all that apply]</i>                                                                                                       |                                    | Ask for advice ..... 1<br>Call for treatment ..... 2<br>Arrange transport ..... 3<br>Appointment ..... 4<br>Reassure family/friends ..... 5<br>Ask for money/supplies ..... 6<br>Provider contacting me for information ..... 7<br>Treatment reminder ..... 8<br>Other (specify) _ ..... 9                                                                                                                                  | 1<br>2<br>3<br>4<br>5<br>6<br>7<br>8<br>9                                                                                                                                                                                                                                                                                                                                                                                   |
| m) Which mobile phone functions did you or anybody else use?<br><i>[Mark all that apply]</i>                                                                                             |                                    | Call ..... 1<br>SMS ..... 2<br>Internet, messenger ..... 3<br>Alarm, calendar, reminder, etc. .... 4<br>Other (specify) _ ..... 5                                                                                                                                                                                                                                                                                           | 1<br>2<br>3<br>4<br>5                                                                                                                                                                                                                                                                                                                                                                                                       |
| 15.6. [Have you / has the child] now recovered from the illness/accident?                                                                                                                |                                    | Yes ..... 1<br>No ..... 0                                                                                                                                                                                                                                                                                                                                                                                                   |                                                                                                                                                                                                                                                                                                                                                                                                                             |
| 15.7. Was anybody of your personal relationships involved in providing advice or help during the illness? <i>[record up to ten names]</i>                                                |                                    | Yes ..... 1<br>No ..... 0                                                                                                                                                                                                                                                                                                                                                                                                   |                                                                                                                                                                                                                                                                                                                                                                                                                             |
| <i>[For district survey]</i><br>15.7.b How are these people related to you? <i>[Mark all that apply]</i>                                                                                 |                                    | Spouse ..... 1<br>Parent ..... 2<br>Child ..... 3<br>Sibling ..... 4<br>Other relative ..... 5<br>Neighbour ..... 6<br>Friend (if not neighbour) ..... 7<br>Other villager ..... 8<br>Other (specify) _ ..... 9                                                                                                                                                                                                             |                                                                                                                                                                                                                                                                                                                                                                                                                             |
| 15.7.c What kind of support did they provide? <i>[Mark all that apply]</i>                                                                                                               |                                    | Providing healthcare/attending ..... 11<br>Providing advice ..... 12<br>Providing medicine ..... 13<br>Lending/granting money ..... 21<br>Transportation/Lending vehicle ..... 22<br>Contacting family/friends ..... 23<br>Providing food ..... 31<br>Helping with children/housework ..... 32<br>Helping with jobs/agriculture work (feeding animals/tending crops/covering shifts, etc.) 33<br>Other (specify) _ ..... 99 |                                                                                                                                                                                                                                                                                                                                                                                                                             |
| <i>[For network survey]</i>                                                                                                                                                              | a) What is the name of the person? | b) How is this person related to you?                                                                                                                                                                                                                                                                                                                                                                                       | c) What kind of support was provided?<br><i>[mark all that apply]</i>                                                                                                                                                                                                                                                                                                                                                       |
| 15.7.1.<br>Contact 1                                                                                                                                                                     | Name:<br>_____                     | Spouse ..... 1<br>Parent ..... 2<br>Child ..... 3<br>Sibling ..... 4<br>Other relative ..... 5<br>Neighbour ..... 6<br>Friend (if not neighbour) ..... 7<br>Other villager ..... 8<br>Other (specify) _ ..... 9                                                                                                                                                                                                             | Providing healthcare/attending ..... 11<br>Providing advice ..... 12<br>Providing medicine ..... 13<br>Lending/granting money ..... 21<br>Transportation/Lending vehicle ..... 22<br>Contacting family/friends ..... 23<br>Providing food ..... 31<br>Helping with children/housework ..... 32<br>Helping with jobs/agriculture work (feeding animals/tending crops/covering shifts, etc.) 33<br>Other (specify) _ ..... 99 |
| 15.7.2.<br>Contact n                                                                                                                                                                     | Name                               | 1 2 3 4 5 6 7 8 9                                                                                                                                                                                                                                                                                                                                                                                                           | 11 12 13 21 22 23 31 32 33 99                                                                                                                                                                                                                                                                                                                                                                                               |

|                                                                                                                                                                                                                                                                          |                                                                                                                                                                                                                                                                                                                                                                                                                                                                                                                                                                                                                                                                                                                                                                                                                                                                                                                   |
|--------------------------------------------------------------------------------------------------------------------------------------------------------------------------------------------------------------------------------------------------------------------------|-------------------------------------------------------------------------------------------------------------------------------------------------------------------------------------------------------------------------------------------------------------------------------------------------------------------------------------------------------------------------------------------------------------------------------------------------------------------------------------------------------------------------------------------------------------------------------------------------------------------------------------------------------------------------------------------------------------------------------------------------------------------------------------------------------------------------------------------------------------------------------------------------------------------|
| <p>15.8. Did you have another acute illness (not a chronic, long-term condition that comes again and again) or an accident in the last two months?<br/> <i>[if yes, complete another sheet for Question 15]</i></p>                                                      | <p>Yes ..... 1 → [Q 15]<br/>                 No ..... 0 ↓</p>                                                                                                                                                                                                                                                                                                                                                                                                                                                                                                                                                                                                                                                                                                                                                                                                                                                     |
| <p>16. I would now like to ask you your opinion about medicine. There are no right or wrong answers, I only want to understand what you think. Consider the following medicines:</p>  |                                                                                                                                                                                                                                                                                                                                                                                                                                                                                                                                                                                                                                                                                                                                                                                                                                                                                                                   |
| <p>16.1. Have you seen these medicines before?</p>                                                                                                                                                                                                                       | <p>Yes ..... 1<br/>                 No ..... 0 → [Q 16.4]</p>                                                                                                                                                                                                                                                                                                                                                                                                                                                                                                                                                                                                                                                                                                                                                                                                                                                     |
| <p>16.2. What do you call this medicine?</p>                                                                                                                                                                                                                             | <p>Antibiotics ຫານເຮັດຍານີ້ວ່າອະໄວ ..... 11<br/>                 Anti-inflammatory ຍານແກ້ອັກເສນ ..... 12<br/>                 Germ killer ຍາຜ່າເຂື່ອ ..... 13<br/>                 Amoxy / Amoxicillin ອະມິອກຊີ/ອະມິອກຊີຊີລິນ ..... 14<br/>                 Sore throat medicine ຍານແກ້ເຈັບຄອ ..... 15<br/>                 Cough medicine ຍານກັໄອ ..... 16<br/>                 Pain reliever ຍານແກ້ປວດ ..... 17<br/>                 Fever reliever ຍານແກ້ໄຂ້ ..... 18<br/>                 Other (specify: _____) ອື່ນໆ (ໄປຮຽນ) ..... 98<br/>                 Germ preventer / antibiotic ຍາຕ້ານເຊື້ອ ..... 21<br/>                 Amok ຍາຕ້ານເຊື້ອ ..... 22<br/>                 Ampicillin ຍາແອມປິ ..... 23<br/>                 Tetra ຍາຕຕຕາ ..... 24<br/>                 Gulolam ກູໂລລາມ ..... 25<br/>                 Sepasin ເຊພາສິນ ..... 26<br/>                 Other (specify: _____) ..... 99</p> |
| <p>16.3. What symptoms or illnesses would you use this medicine for?</p>                                                                                                                                                                                                 | <p>Fever ..... 1<br/>                 Cough ..... 2<br/>                 Sore throat ..... 3<br/>                 Inflammation ..... 4<br/>                 Cold, flu, runny nose ..... 5<br/>                 Diarrhoea ..... 6<br/>                 Headache ..... 7<br/>                 Stomach ache ..... 8<br/>                 Muscle pain, other aches ..... 9<br/>                 Skin diseases, rashes, lumps ..... 10<br/>                 Wounds ..... 11<br/>                 Urinary tract infections ..... 12<br/>                 Every kind of sickness ..... 13<br/>                 Whatever the doctor suggests ..... 14<br/>                 Don't know / prefer not to say ..... 98<br/>                 Other (specify: _____) ..... 99</p>                                                                                                                                               |
| <p>16.4. Is there any situation for which you would buy this medicine?</p>                                                                                                                                                                                               | <p>Desirable attitude/knowledge ..... 1<br/>                 Undesirable attitude/knowledge ..... 0<br/>                 No attitude / refuse to answer (respondent is aware, but doesn't reveal attitude) ..... 97<br/>                 Answer does not apply to question (respondent may be aware/unaware; satisficing) ..... 98<br/>                 Not aware of this medicine (awkward, cannot answer but does not try to satisfy) ..... 99</p>                                                                                                                                                                                                                                                                                                                                                                                                                                                              |
| <p>16.5. Do you prefer other remedies such as herbs or cough syrup to this medicine for [sore throat]?</p>                                                                                                                                                               | <p>Desirable attitude/knowledge ..... 1<br/>                 Undesirable attitude/knowledge ..... 0<br/>                 No attitude / refuse to answer (respondent is aware, but doesn't reveal attitude) ..... 97<br/>                 Answer does not apply to question (respondent may be aware/unaware; satisficing) ..... 98<br/>                 Not aware of this medicine (awkward, cannot answer but does not try to satisfy) ..... 99</p>                                                                                                                                                                                                                                                                                                                                                                                                                                                              |
| <p>16.6. If you were prescribed this medicine by a doctor and did not finish the course, would you keep it for future use?</p>                                                                                                                                           | <p>Desirable attitude/knowledge ..... 1<br/>                 Undesirable attitude/knowledge ..... 0<br/>                 No attitude / refuse to answer (respondent is aware, but doesn't reveal attitude) ..... 97<br/>                 Answer does not apply to question (respondent may be aware/unaware; satisficing) ..... 98<br/>                 Not aware of this medicine (awkward, cannot answer but does not try to satisfy) ..... 99</p>                                                                                                                                                                                                                                                                                                                                                                                                                                                              |
| <p>16.7. Have you heard about drug resistance?<br/>                 (16.7a using alternative term "lueng yah" in Lao)</p>                                                                                                                                                | <p>Yes ..... 1<br/>                 No ..... 2</p>                                                                                                                                                                                                                                                                                                                                                                                                                                                                                                                                                                                                                                                                                                                                                                                                                                                                |
| <p>16.8. What do you think is drug resistance?<br/>                 (16.8a using alternative term "lueng yah" in Lao)</p>                                                                                                                                                | <p>Bacteria are resistant to medicine ..... 1<br/>                 Antibiotics become less effective if used wrongly/too much ..... 2<br/>                 Medicine in general becomes less effective if used wrongly/too much ..... 3<br/>                 Being stubborn to take medicine ..... 4<br/>                 Being addicted to medicine ..... 5<br/>                 Drug allergy ..... 6<br/>                 Lueng yah (drug resistance) ..... 7<br/>                 Answer does not relate to drug resistance ..... 8<br/>                 Other (specify) ..... 98<br/>                 "Don't know" ..... 99</p>                                                                                                                                                                                                                                                                                |
| <p>16.9. Can your drug resistance ("due yah") spread to other people, for example if you sneeze on them?</p>                                                                                                                                                             | <p>Desirable attitude/knowledge ..... 1<br/>                 Undesirable attitude/knowledge ..... 0<br/>                 No attitude / refuse to answer (respondent is aware, but doesn't reveal attitude) ..... 97<br/>                 Answer does not apply to question (respondent may be aware/unaware; satisficing) ..... 98<br/>                 Not aware of this medicine (awkward, cannot answer but does not try to satisfy) ..... 99</p>                                                                                                                                                                                                                                                                                                                                                                                                                                                              |



| Part IV: Household assets                                                                                                                                                            |                                                                                                                                                                    |                            |   |
|--------------------------------------------------------------------------------------------------------------------------------------------------------------------------------------|--------------------------------------------------------------------------------------------------------------------------------------------------------------------|----------------------------|---|
| We now come to the last part. Can you please provide me with some information about your household?                                                                                  |                                                                                                                                                                    |                            |   |
| 17. How many rooms does this house have apart from toilet and hallways?                                                                                                              | Number of rooms: _____                                                                                                                                             |                            |   |
| 18. What is the electricity situation in your household on a typical day?                                                                                                            | Power at all times, no power cuts (90-100%) .....                                                                                                                  | 1                          |   |
|                                                                                                                                                                                      | Power most of the time, occasional power cuts (>50%) .....                                                                                                         | 2                          |   |
|                                                                                                                                                                                      | Power sometimes, frequent power cuts (<50%) .....                                                                                                                  | 3                          |   |
|                                                                                                                                                                                      | No electricity .....                                                                                                                                               | 4                          |   |
| 19. What kind of toilet does this house have and is it shared with other people in this community?<br>[if more than one, choose "best" toilet] [use show card to facilitate answers] | Unshared flush toilet (e.g. piped sewer system, septic tank, pour flush toilet).....                                                                               | 1                          |   |
|                                                                                                                                                                                      | Shared (flush or non-flush) toilet with other community members or public toilet                                                                                   | 2                          |   |
|                                                                                                                                                                                      | No facility, Bush, Field, or others.....                                                                                                                           | 3                          |   |
| 20. What is the drinking water source of this house and is it shared with other people in this community?<br>[use show card to facilitate answers]                                   | Water piped into house or yard.....                                                                                                                                | 1                          |   |
|                                                                                                                                                                                      | Water not directly piped into house or yard (e.g. well, borehole, water from spring, rainwater, tanker truck, surface water including rivers, bottled water, etc.) | 2                          |   |
| 21. What kind of fuel does this household use for cooking?                                                                                                                           | Improved fuel source (e.g. Electricity, gas stove, etc.).....                                                                                                      | 1                          |   |
|                                                                                                                                                                                      | Unimproved fuel source (e.g. Coal / Lignite, Charcoal, Wood, Straw / Shrubs / Grass, Animal dung, Agricultural crop residue) .....                                 | 2                          |   |
|                                                                                                                                                                                      | No food cooked in household.....                                                                                                                                   | 3                          |   |
| 22. I will now ask you for some items in your household. Please tell me...                                                                                                           | Number of items in household:                                                                                                                                      |                            |   |
|                                                                                                                                                                                      | 22.1. Have you got a <i>functioning</i> radio in your household? If so, how many?                                                                                  | ___                        |   |
|                                                                                                                                                                                      | 22.2. Have you got a <i>functioning</i> TV in your household? If so, how many?                                                                                     | ___                        |   |
|                                                                                                                                                                                      | 22.3. Have you got a <i>functioning</i> rice cooker in your household? If so, how many?                                                                            | ___                        |   |
|                                                                                                                                                                                      | 22.4. Have you got a <i>functioning</i> landline telephone in your household? If so, how many?                                                                     | ___                        |   |
|                                                                                                                                                                                      | 22.5. Have you got a <i>functioning</i> mobile phone in your household? If so, how many?                                                                           | ___                        |   |
|                                                                                                                                                                                      | 22.6. Have you got a <i>functioning</i> computer in your household? If so, how many?                                                                               | ___                        |   |
|                                                                                                                                                                                      | 22.7. Have you got a <i>functioning</i> bicycle in your household? If so, how many?                                                                                | ___                        |   |
|                                                                                                                                                                                      | 22.8. Have you got a <i>functioning</i> scooter, motorcycle, or tricycle in your household? If so, how many?                                                       | ___                        |   |
|                                                                                                                                                                                      | 22.9. Have you got a <i>functioning</i> car or truck in your household? If so, how many?                                                                           | ___                        |   |
|                                                                                                                                                                                      | 22.10. Have you got a <i>functioning</i> tractor in your household? If so, how many?                                                                               | ___                        |   |
| 22.11. Have you got a <i>functioning</i> refrigerator or freezer in your household? If so, how many?                                                                                 | ___                                                                                                                                                                |                            |   |
| 23. How long does it normally take you to get to the following places?                                                                                                               | 23.1. How long does it take to get to the nearest market?                                                                                                          | Less than 10 minutes ..... | 1 |
|                                                                                                                                                                                      |                                                                                                                                                                    | 10 to 29 minutes .....     | 2 |
|                                                                                                                                                                                      |                                                                                                                                                                    | 30 to 59 minutes .....     | 3 |
|                                                                                                                                                                                      | 23.2. How long does it take to get to the village hall or the village head's house?                                                                                | Less than 10 minutes ..... | 1 |
|                                                                                                                                                                                      |                                                                                                                                                                    | 10 to 29 minutes .....     | 2 |
|                                                                                                                                                                                      |                                                                                                                                                                    | 30 to 59 minutes .....     | 3 |
|                                                                                                                                                                                      | 23.3. How long does it take to get to the nearest public or private doctor?                                                                                        | Less than 10 minutes ..... | 1 |
|                                                                                                                                                                                      |                                                                                                                                                                    | 10 to 29 minutes .....     | 2 |
|                                                                                                                                                                                      |                                                                                                                                                                    | 30 to 59 minutes .....     | 3 |
| 24. What is your religion?                                                                                                                                                           | No religion .....                                                                                                                                                  | 0                          |   |
|                                                                                                                                                                                      | Buddhist.....                                                                                                                                                      | 1                          |   |
|                                                                                                                                                                                      | Christian.....                                                                                                                                                     | 2                          |   |
|                                                                                                                                                                                      | Muslim .....                                                                                                                                                       | 3                          |   |
|                                                                                                                                                                                      | Spirit (religious belief in Lao).....                                                                                                                              | 4                          |   |
|                                                                                                                                                                                      | Other (Specify) .....                                                                                                                                              | 5                          |   |
|                                                                                                                                                                                      | Don't know .....                                                                                                                                                   | 99                         |   |
|                                                                                                                                                                                      | 25. What is your nationality?                                                                                                                                      | Thai .....                 | 1 |
|                                                                                                                                                                                      |                                                                                                                                                                    | Lao.....                   | 2 |
| Myanmar/Burmese .....                                                                                                                                                                |                                                                                                                                                                    | 3                          |   |
| Chinese .....                                                                                                                                                                        |                                                                                                                                                                    | 4                          |   |
| Other (Specify) .....                                                                                                                                                                |                                                                                                                                                                    | 9                          |   |
| Don't know .....                                                                                                                                                                     |                                                                                                                                                                    | 99                         |   |

|                                                                                              |                                                                                                                                                                                                                                                                                                                                                                                                                                                                                                                                                                                                                                                                                                                                                                                                                                                                                                                                                                                                                                                                                                                                                                                                                                                                                                                                                            |                         |   |                                        |   |                            |   |                          |   |                       |   |                    |   |                    |   |                  |   |               |   |                        |    |                     |    |           |    |               |    |                      |    |                |    |                       |    |                  |    |
|----------------------------------------------------------------------------------------------|------------------------------------------------------------------------------------------------------------------------------------------------------------------------------------------------------------------------------------------------------------------------------------------------------------------------------------------------------------------------------------------------------------------------------------------------------------------------------------------------------------------------------------------------------------------------------------------------------------------------------------------------------------------------------------------------------------------------------------------------------------------------------------------------------------------------------------------------------------------------------------------------------------------------------------------------------------------------------------------------------------------------------------------------------------------------------------------------------------------------------------------------------------------------------------------------------------------------------------------------------------------------------------------------------------------------------------------------------------|-------------------------|---|----------------------------------------|---|----------------------------|---|--------------------------|---|-----------------------|---|--------------------|---|--------------------|---|------------------|---|---------------|---|------------------------|----|---------------------|----|-----------|----|---------------|----|----------------------|----|----------------|----|-----------------------|----|------------------|----|
| <p>26. What is your ethnic background?</p>                                                   | <table style="width: 100%; border-collapse: collapse;"> <tr><td>Thai .....</td><td style="text-align: right;">1</td></tr> <tr><td>Tai Yai .....</td><td style="text-align: right;">2</td></tr> <tr><td>Akha (E-Koh) .....</td><td style="text-align: right;">3</td></tr> <tr><td>Pakakeryor (Karen) .....</td><td style="text-align: right;">4</td></tr> <tr><td>Lahu (Muser) .....</td><td style="text-align: right;">5</td></tr> <tr><td>Lisu (Lisaw) .....</td><td style="text-align: right;">6</td></tr> <tr><td>Hmong (Meaw) .....</td><td style="text-align: right;">7</td></tr> <tr><td>Mien (Yao) .....</td><td style="text-align: right;">8</td></tr> <tr><td>Burmese .....</td><td style="text-align: right;">9</td></tr> <tr><td>Yunnan (Jin Haw) .....</td><td style="text-align: right;">10</td></tr> <tr><td>Tai Lue (Tai) .....</td><td style="text-align: right;">11</td></tr> <tr><td>Lao .....</td><td style="text-align: right;">21</td></tr> <tr><td>Kathuic .....</td><td style="text-align: right;">22</td></tr> <tr><td>Bahnaric Khmer .....</td><td style="text-align: right;">23</td></tr> <tr><td>Tai Thai .....</td><td style="text-align: right;">24</td></tr> <tr><td>Other (Specify) .....</td><td style="text-align: right;">30</td></tr> <tr><td>Don't know .....</td><td style="text-align: right;">99</td></tr> </table> | Thai .....              | 1 | Tai Yai .....                          | 2 | Akha (E-Koh) .....         | 3 | Pakakeryor (Karen) ..... | 4 | Lahu (Muser) .....    | 5 | Lisu (Lisaw) ..... | 6 | Hmong (Meaw) ..... | 7 | Mien (Yao) ..... | 8 | Burmese ..... | 9 | Yunnan (Jin Haw) ..... | 10 | Tai Lue (Tai) ..... | 11 | Lao ..... | 21 | Kathuic ..... | 22 | Bahnaric Khmer ..... | 23 | Tai Thai ..... | 24 | Other (Specify) ..... | 30 | Don't know ..... | 99 |
| Thai .....                                                                                   | 1                                                                                                                                                                                                                                                                                                                                                                                                                                                                                                                                                                                                                                                                                                                                                                                                                                                                                                                                                                                                                                                                                                                                                                                                                                                                                                                                                          |                         |   |                                        |   |                            |   |                          |   |                       |   |                    |   |                    |   |                  |   |               |   |                        |    |                     |    |           |    |               |    |                      |    |                |    |                       |    |                  |    |
| Tai Yai .....                                                                                | 2                                                                                                                                                                                                                                                                                                                                                                                                                                                                                                                                                                                                                                                                                                                                                                                                                                                                                                                                                                                                                                                                                                                                                                                                                                                                                                                                                          |                         |   |                                        |   |                            |   |                          |   |                       |   |                    |   |                    |   |                  |   |               |   |                        |    |                     |    |           |    |               |    |                      |    |                |    |                       |    |                  |    |
| Akha (E-Koh) .....                                                                           | 3                                                                                                                                                                                                                                                                                                                                                                                                                                                                                                                                                                                                                                                                                                                                                                                                                                                                                                                                                                                                                                                                                                                                                                                                                                                                                                                                                          |                         |   |                                        |   |                            |   |                          |   |                       |   |                    |   |                    |   |                  |   |               |   |                        |    |                     |    |           |    |               |    |                      |    |                |    |                       |    |                  |    |
| Pakakeryor (Karen) .....                                                                     | 4                                                                                                                                                                                                                                                                                                                                                                                                                                                                                                                                                                                                                                                                                                                                                                                                                                                                                                                                                                                                                                                                                                                                                                                                                                                                                                                                                          |                         |   |                                        |   |                            |   |                          |   |                       |   |                    |   |                    |   |                  |   |               |   |                        |    |                     |    |           |    |               |    |                      |    |                |    |                       |    |                  |    |
| Lahu (Muser) .....                                                                           | 5                                                                                                                                                                                                                                                                                                                                                                                                                                                                                                                                                                                                                                                                                                                                                                                                                                                                                                                                                                                                                                                                                                                                                                                                                                                                                                                                                          |                         |   |                                        |   |                            |   |                          |   |                       |   |                    |   |                    |   |                  |   |               |   |                        |    |                     |    |           |    |               |    |                      |    |                |    |                       |    |                  |    |
| Lisu (Lisaw) .....                                                                           | 6                                                                                                                                                                                                                                                                                                                                                                                                                                                                                                                                                                                                                                                                                                                                                                                                                                                                                                                                                                                                                                                                                                                                                                                                                                                                                                                                                          |                         |   |                                        |   |                            |   |                          |   |                       |   |                    |   |                    |   |                  |   |               |   |                        |    |                     |    |           |    |               |    |                      |    |                |    |                       |    |                  |    |
| Hmong (Meaw) .....                                                                           | 7                                                                                                                                                                                                                                                                                                                                                                                                                                                                                                                                                                                                                                                                                                                                                                                                                                                                                                                                                                                                                                                                                                                                                                                                                                                                                                                                                          |                         |   |                                        |   |                            |   |                          |   |                       |   |                    |   |                    |   |                  |   |               |   |                        |    |                     |    |           |    |               |    |                      |    |                |    |                       |    |                  |    |
| Mien (Yao) .....                                                                             | 8                                                                                                                                                                                                                                                                                                                                                                                                                                                                                                                                                                                                                                                                                                                                                                                                                                                                                                                                                                                                                                                                                                                                                                                                                                                                                                                                                          |                         |   |                                        |   |                            |   |                          |   |                       |   |                    |   |                    |   |                  |   |               |   |                        |    |                     |    |           |    |               |    |                      |    |                |    |                       |    |                  |    |
| Burmese .....                                                                                | 9                                                                                                                                                                                                                                                                                                                                                                                                                                                                                                                                                                                                                                                                                                                                                                                                                                                                                                                                                                                                                                                                                                                                                                                                                                                                                                                                                          |                         |   |                                        |   |                            |   |                          |   |                       |   |                    |   |                    |   |                  |   |               |   |                        |    |                     |    |           |    |               |    |                      |    |                |    |                       |    |                  |    |
| Yunnan (Jin Haw) .....                                                                       | 10                                                                                                                                                                                                                                                                                                                                                                                                                                                                                                                                                                                                                                                                                                                                                                                                                                                                                                                                                                                                                                                                                                                                                                                                                                                                                                                                                         |                         |   |                                        |   |                            |   |                          |   |                       |   |                    |   |                    |   |                  |   |               |   |                        |    |                     |    |           |    |               |    |                      |    |                |    |                       |    |                  |    |
| Tai Lue (Tai) .....                                                                          | 11                                                                                                                                                                                                                                                                                                                                                                                                                                                                                                                                                                                                                                                                                                                                                                                                                                                                                                                                                                                                                                                                                                                                                                                                                                                                                                                                                         |                         |   |                                        |   |                            |   |                          |   |                       |   |                    |   |                    |   |                  |   |               |   |                        |    |                     |    |           |    |               |    |                      |    |                |    |                       |    |                  |    |
| Lao .....                                                                                    | 21                                                                                                                                                                                                                                                                                                                                                                                                                                                                                                                                                                                                                                                                                                                                                                                                                                                                                                                                                                                                                                                                                                                                                                                                                                                                                                                                                         |                         |   |                                        |   |                            |   |                          |   |                       |   |                    |   |                    |   |                  |   |               |   |                        |    |                     |    |           |    |               |    |                      |    |                |    |                       |    |                  |    |
| Kathuic .....                                                                                | 22                                                                                                                                                                                                                                                                                                                                                                                                                                                                                                                                                                                                                                                                                                                                                                                                                                                                                                                                                                                                                                                                                                                                                                                                                                                                                                                                                         |                         |   |                                        |   |                            |   |                          |   |                       |   |                    |   |                    |   |                  |   |               |   |                        |    |                     |    |           |    |               |    |                      |    |                |    |                       |    |                  |    |
| Bahnaric Khmer .....                                                                         | 23                                                                                                                                                                                                                                                                                                                                                                                                                                                                                                                                                                                                                                                                                                                                                                                                                                                                                                                                                                                                                                                                                                                                                                                                                                                                                                                                                         |                         |   |                                        |   |                            |   |                          |   |                       |   |                    |   |                    |   |                  |   |               |   |                        |    |                     |    |           |    |               |    |                      |    |                |    |                       |    |                  |    |
| Tai Thai .....                                                                               | 24                                                                                                                                                                                                                                                                                                                                                                                                                                                                                                                                                                                                                                                                                                                                                                                                                                                                                                                                                                                                                                                                                                                                                                                                                                                                                                                                                         |                         |   |                                        |   |                            |   |                          |   |                       |   |                    |   |                    |   |                  |   |               |   |                        |    |                     |    |           |    |               |    |                      |    |                |    |                       |    |                  |    |
| Other (Specify) .....                                                                        | 30                                                                                                                                                                                                                                                                                                                                                                                                                                                                                                                                                                                                                                                                                                                                                                                                                                                                                                                                                                                                                                                                                                                                                                                                                                                                                                                                                         |                         |   |                                        |   |                            |   |                          |   |                       |   |                    |   |                    |   |                  |   |               |   |                        |    |                     |    |           |    |               |    |                      |    |                |    |                       |    |                  |    |
| Don't know .....                                                                             | 99                                                                                                                                                                                                                                                                                                                                                                                                                                                                                                                                                                                                                                                                                                                                                                                                                                                                                                                                                                                                                                                                                                                                                                                                                                                                                                                                                         |                         |   |                                        |   |                            |   |                          |   |                       |   |                    |   |                    |   |                  |   |               |   |                        |    |                     |    |           |    |               |    |                      |    |                |    |                       |    |                  |    |
| xi. Interview end time                                                                       | [time entered automatically]                                                                                                                                                                                                                                                                                                                                                                                                                                                                                                                                                                                                                                                                                                                                                                                                                                                                                                                                                                                                                                                                                                                                                                                                                                                                                                                               |                         |   |                                        |   |                            |   |                          |   |                       |   |                    |   |                    |   |                  |   |               |   |                        |    |                     |    |           |    |               |    |                      |    |                |    |                       |    |                  |    |
| Thank you very much for participating in this survey. [give gift to respondent]              |                                                                                                                                                                                                                                                                                                                                                                                                                                                                                                                                                                                                                                                                                                                                                                                                                                                                                                                                                                                                                                                                                                                                                                                                                                                                                                                                                            |                         |   |                                        |   |                            |   |                          |   |                       |   |                    |   |                    |   |                  |   |               |   |                        |    |                     |    |           |    |               |    |                      |    |                |    |                       |    |                  |    |
| <b>Part V: Interviewer observations [to be completed by interviewer after interview]</b>     |                                                                                                                                                                                                                                                                                                                                                                                                                                                                                                                                                                                                                                                                                                                                                                                                                                                                                                                                                                                                                                                                                                                                                                                                                                                                                                                                                            |                         |   |                                        |   |                            |   |                          |   |                       |   |                    |   |                    |   |                  |   |               |   |                        |    |                     |    |           |    |               |    |                      |    |                |    |                       |    |                  |    |
| xii. Was the interview completed?                                                            | <table style="width: 100%; border-collapse: collapse;"> <tr><td>Yes .....</td><td style="text-align: right;">1</td></tr> <tr><td>Yes, with difficulties .....</td><td style="text-align: right;">2</td></tr> <tr><td>No .....</td><td style="text-align: right;">3</td></tr> </table>                                                                                                                                                                                                                                                                                                                                                                                                                                                                                                                                                                                                                                                                                                                                                                                                                                                                                                                                                                                                                                                                      | Yes .....               | 1 | Yes, with difficulties .....           | 2 | No .....                   | 3 |                          |   |                       |   |                    |   |                    |   |                  |   |               |   |                        |    |                     |    |           |    |               |    |                      |    |                |    |                       |    |                  |    |
| Yes .....                                                                                    | 1                                                                                                                                                                                                                                                                                                                                                                                                                                                                                                                                                                                                                                                                                                                                                                                                                                                                                                                                                                                                                                                                                                                                                                                                                                                                                                                                                          |                         |   |                                        |   |                            |   |                          |   |                       |   |                    |   |                    |   |                  |   |               |   |                        |    |                     |    |           |    |               |    |                      |    |                |    |                       |    |                  |    |
| Yes, with difficulties .....                                                                 | 2                                                                                                                                                                                                                                                                                                                                                                                                                                                                                                                                                                                                                                                                                                                                                                                                                                                                                                                                                                                                                                                                                                                                                                                                                                                                                                                                                          |                         |   |                                        |   |                            |   |                          |   |                       |   |                    |   |                    |   |                  |   |               |   |                        |    |                     |    |           |    |               |    |                      |    |                |    |                       |    |                  |    |
| No .....                                                                                     | 3                                                                                                                                                                                                                                                                                                                                                                                                                                                                                                                                                                                                                                                                                                                                                                                                                                                                                                                                                                                                                                                                                                                                                                                                                                                                                                                                                          |                         |   |                                        |   |                            |   |                          |   |                       |   |                    |   |                    |   |                  |   |               |   |                        |    |                     |    |           |    |               |    |                      |    |                |    |                       |    |                  |    |
| xiii. Was someone else present during the interview?<br>[mark all that apply]                | <table style="width: 100%; border-collapse: collapse;"> <tr><td>Survey supervisor .....</td><td style="text-align: right;">1</td></tr> <tr><td>Other household or family member .....</td><td style="text-align: right;">2</td></tr> <tr><td>Medical practitioner .....</td><td style="text-align: right;">3</td></tr> <tr><td>Government officer .....</td><td style="text-align: right;">4</td></tr> <tr><td>Other (specify) .....</td><td style="text-align: right;">5</td></tr> <tr><td>No one .....</td><td style="text-align: right;">0</td></tr> </table>                                                                                                                                                                                                                                                                                                                                                                                                                                                                                                                                                                                                                                                                                                                                                                                           | Survey supervisor ..... | 1 | Other household or family member ..... | 2 | Medical practitioner ..... | 3 | Government officer ..... | 4 | Other (specify) ..... | 5 | No one .....       | 0 |                    |   |                  |   |               |   |                        |    |                     |    |           |    |               |    |                      |    |                |    |                       |    |                  |    |
| Survey supervisor .....                                                                      | 1                                                                                                                                                                                                                                                                                                                                                                                                                                                                                                                                                                                                                                                                                                                                                                                                                                                                                                                                                                                                                                                                                                                                                                                                                                                                                                                                                          |                         |   |                                        |   |                            |   |                          |   |                       |   |                    |   |                    |   |                  |   |               |   |                        |    |                     |    |           |    |               |    |                      |    |                |    |                       |    |                  |    |
| Other household or family member .....                                                       | 2                                                                                                                                                                                                                                                                                                                                                                                                                                                                                                                                                                                                                                                                                                                                                                                                                                                                                                                                                                                                                                                                                                                                                                                                                                                                                                                                                          |                         |   |                                        |   |                            |   |                          |   |                       |   |                    |   |                    |   |                  |   |               |   |                        |    |                     |    |           |    |               |    |                      |    |                |    |                       |    |                  |    |
| Medical practitioner .....                                                                   | 3                                                                                                                                                                                                                                                                                                                                                                                                                                                                                                                                                                                                                                                                                                                                                                                                                                                                                                                                                                                                                                                                                                                                                                                                                                                                                                                                                          |                         |   |                                        |   |                            |   |                          |   |                       |   |                    |   |                    |   |                  |   |               |   |                        |    |                     |    |           |    |               |    |                      |    |                |    |                       |    |                  |    |
| Government officer .....                                                                     | 4                                                                                                                                                                                                                                                                                                                                                                                                                                                                                                                                                                                                                                                                                                                                                                                                                                                                                                                                                                                                                                                                                                                                                                                                                                                                                                                                                          |                         |   |                                        |   |                            |   |                          |   |                       |   |                    |   |                    |   |                  |   |               |   |                        |    |                     |    |           |    |               |    |                      |    |                |    |                       |    |                  |    |
| Other (specify) .....                                                                        | 5                                                                                                                                                                                                                                                                                                                                                                                                                                                                                                                                                                                                                                                                                                                                                                                                                                                                                                                                                                                                                                                                                                                                                                                                                                                                                                                                                          |                         |   |                                        |   |                            |   |                          |   |                       |   |                    |   |                    |   |                  |   |               |   |                        |    |                     |    |           |    |               |    |                      |    |                |    |                       |    |                  |    |
| No one .....                                                                                 | 0                                                                                                                                                                                                                                                                                                                                                                                                                                                                                                                                                                                                                                                                                                                                                                                                                                                                                                                                                                                                                                                                                                                                                                                                                                                                                                                                                          |                         |   |                                        |   |                            |   |                          |   |                       |   |                    |   |                    |   |                  |   |               |   |                        |    |                     |    |           |    |               |    |                      |    |                |    |                       |    |                  |    |
| xiv. What is your evaluation of the accuracy and trustworthiness of the informant's answers? | <table style="width: 100%; border-collapse: collapse;"> <tr><td>Very good .....</td><td style="text-align: right;">1</td></tr> <tr><td>Satisfactory .....</td><td style="text-align: right;">2</td></tr> <tr><td>Doubtful .....</td><td style="text-align: right;">3</td></tr> <tr><td>Very low .....</td><td style="text-align: right;">4</td></tr> </table>                                                                                                                                                                                                                                                                                                                                                                                                                                                                                                                                                                                                                                                                                                                                                                                                                                                                                                                                                                                              | Very good .....         | 1 | Satisfactory .....                     | 2 | Doubtful .....             | 3 | Very low .....           | 4 |                       |   |                    |   |                    |   |                  |   |               |   |                        |    |                     |    |           |    |               |    |                      |    |                |    |                       |    |                  |    |
| Very good .....                                                                              | 1                                                                                                                                                                                                                                                                                                                                                                                                                                                                                                                                                                                                                                                                                                                                                                                                                                                                                                                                                                                                                                                                                                                                                                                                                                                                                                                                                          |                         |   |                                        |   |                            |   |                          |   |                       |   |                    |   |                    |   |                  |   |               |   |                        |    |                     |    |           |    |               |    |                      |    |                |    |                       |    |                  |    |
| Satisfactory .....                                                                           | 2                                                                                                                                                                                                                                                                                                                                                                                                                                                                                                                                                                                                                                                                                                                                                                                                                                                                                                                                                                                                                                                                                                                                                                                                                                                                                                                                                          |                         |   |                                        |   |                            |   |                          |   |                       |   |                    |   |                    |   |                  |   |               |   |                        |    |                     |    |           |    |               |    |                      |    |                |    |                       |    |                  |    |
| Doubtful .....                                                                               | 3                                                                                                                                                                                                                                                                                                                                                                                                                                                                                                                                                                                                                                                                                                                                                                                                                                                                                                                                                                                                                                                                                                                                                                                                                                                                                                                                                          |                         |   |                                        |   |                            |   |                          |   |                       |   |                    |   |                    |   |                  |   |               |   |                        |    |                     |    |           |    |               |    |                      |    |                |    |                       |    |                  |    |
| Very low .....                                                                               | 4                                                                                                                                                                                                                                                                                                                                                                                                                                                                                                                                                                                                                                                                                                                                                                                                                                                                                                                                                                                                                                                                                                                                                                                                                                                                                                                                                          |                         |   |                                        |   |                            |   |                          |   |                       |   |                    |   |                    |   |                  |   |               |   |                        |    |                     |    |           |    |               |    |                      |    |                |    |                       |    |                  |    |
| xv. Were there any unusual circumstances during the interview?                               | Please describe: _____                                                                                                                                                                                                                                                                                                                                                                                                                                                                                                                                                                                                                                                                                                                                                                                                                                                                                                                                                                                                                                                                                                                                                                                                                                                                                                                                     |                         |   |                                        |   |                            |   |                          |   |                       |   |                    |   |                    |   |                  |   |               |   |                        |    |                     |    |           |    |               |    |                      |    |                |    |                       |    |                  |    |

## INTERVIEW GUIDES – COGNITIVE INTERVIEWS FOR SURVEY TESTING

บทสัมภาษณ์ – การสัมภาษณ์กระบวนการคิดเพื่อการทดสอบแบบสอบถาม

บิกสำเนา - งานสำเนากระบวนการคิดเพื่อการทดสอบแบบสอบถาม

### Objective วัตถุประสงค์ จุดประสงค์

To understand how survey participants understand the survey questions and arrive at their answers. เพื่อเรียนรู้ว่าผู้เข้าร่วมงานวิจัยมีการทำความเข้าใจคำถามที่ใช้ในแบบสอบถามอย่างไร และมีความคิดอย่างไรก่อนตัดสินใจตอบคำถามแต่ละข้อ เพื่อเรียนรู้ว่าผู้เข้าร่วมงานวิจัยมีความเข้าใจคำถามที่ใช้ในแบบสอบถามแบบใด และมีความคิดแบบใดก่อนตัดสินใจตอบคำถามแต่ละข้อ

### Introduction บทนำ บิกนำ

<Obtaining verbal informed consent in accordance with Oral Consent Script> <ดำเนินการขอคำยินยอม โดยใช้ข้อความสำหรับอธิบายงานวิจัยและขอคำยินยอมเข้าร่วมการวิจัยด้วยวาจา> <ดำเนินการขอคำยินยอมโดยใช้ข้อความสำหรับอธิบายวัตถุประสงค์และขอคำยินยอมเข้าร่วมงานวิจัยด้วยวาจา>

*Thank you for agreeing to participate in this study. ขอขอบคุณท่านสำหรับการตกลงเข้าร่วมการวิจัยครั้งนี้ ขอใจท่านสำหรับงานวิจัยที่เข้าร่วมงานวิจัยในครั้งนี้*

### Part I – About Yourself ส่วนที่ 1 – เกี่ยวกับตัวท่าน ส่วนที่ 1 - ภาวกับตัวท่าน

*Let us start with a few questions about yourself. เราจะเริ่มโดยถามคำถามเกี่ยวกับข้อมูลส่วนตัวของท่าน เราจะไม่ถามคำถามที่เกี่ยวกับคุณลักษณะส่วนตัวของคุณ*

Guiding question: Who is my informant? คำถามนำ: ผู้ให้สัมภาษณ์คือใคร คำถามนำ: ผู้ใช้สำเนาแบบใด

1. How old are you? อายุของท่าน อายุท่าน
2. What is your level of education? การศึกษาสูงสุดของท่าน การศึกษาสูงสุดของท่าน
3. What is your ethnicity and nationality? เชื้อชาติ และ สัญชาติของท่าน เชื้อชาติและสัญชาติของท่าน

### Part II – Practicing the “Think Aloud” Technique ส่วนที่ 2 – เทคนิคการคิดออกเสียง (การบรรยายกระบวนการคิด) ส่วนที่ 2 - ภาวกับ

การคิดออกเสียง (การบรรยายกระบวนการคิด)

*Thank you. As we are trying to improve our survey, you can help us develop the questionnaire by participating in this interview. I would like to ask you to describe your thoughts as you think about the question and the answer as though you are talking to yourself. For example, what do you think as you receive the question? What does the question make you think of? In what way do you want answer to question? How do you arrive at your answer? Let me give you an example so you understand this type of interview better.*

*Let's say I was asked a question about “What do you see when you go from your home to the nearest temple?” If I was thinking out loud, I would say “[interviewer describing their own village].” So you can see how it works, though that was only one of many ways. The important thing is that there are no right or wrong answers. What really matters is your view and thought process. And this is what I would like you to share with me. So now it is your turn to practice.*

ขอบคุณครับ/ค่ะ เนื่องจากเรากำลังอยู่ในช่วงปรับปรุงแบบสอบถาม ท่านสามารถช่วยเราพัฒนาแบบสอบถามนี้ได้โดยการเข้าร่วมการสัมภาษณ์นี้ ซึ่งเราจะขอให้ท่านบรรยายความคิดของท่านในขณะที่ท่านพิจารณาคำถามและคำตอบเสมือนกับท่านกำลังคุยกับตนเอง เช่น ท่านคิดอย่างไรเมื่อท่านได้รับคำถาม คำถามทำให้ท่านนึกถึงอะไรบ้าง ท่านต้องการตอบคำถามเหล่านี้ได้อย่างไร ท่านได้คำตอบมาได้อย่างไร เราจะยกตัวอย่างให้ท่านหนึ่งตัวอย่างเพื่อให้ท่านสามารถเข้าใจการสัมภาษณ์ในลักษณะนี้มากขึ้น

ยกตัวอย่าง ถ้าเราต้องตอบคำถามที่ว่า “ท่านมองเห็นอะไรบ้างหากท่านเดินทางจากบ้านไปวัดที่ใกล้ที่สุด” และเราต้องบรรยายความคิดของเราให้ท่านฟัง เราจะพูดว่า “ผู้สัมภาษณ์บรรยายการเดินทางในหมู่บ้านของตนเอง” ซึ่งเป็นเพียงหนึ่งในหลากหลายวิธีที่ท่านสามารถใช้ได้ สิ่งที่สำคัญที่สุดเกี่ยวกับการคิดออกเสียงของท่านคือคำตอบของท่านจะไม่ถูกตัดสินว่าถูกหรือผิด เพราะสิ่งที่เราต้องการเรียนรู้มากที่สุดคือมุมมองและวิธีการคิดของท่าน และนั่นคือสิ่งที่เราอยากให้คุณแบ่งปันกับเรา ดังนั้นเราจึงขอให้ท่านลองคิดออกเสียงกับเราในคำถามต่อไปนี้

ຂອບໃຈ ເນື່ອງຈາກເຮົາກຳລັງຢູ່ໃນຊ່ວງປັບປຸງແບບສອບຖາມ ທ່ານສາມາດຊ່ວຍເຮົາພັດທະນາແບບສອບຖາມນີ້ໄດ້ໂດຍການເຂົ້າຮ່ວມການສຳພາດນີ້ ເຊິ່ງເຮົາຈະຂໍໃຫ້ທ່ານບັນລະຍາຍຄວາມຄິດຂອງທ່ານໃນຕອນທີ່ທ່ານກຳລັງພິຈາລະນາຄຳຖາມແລະຄຳຕອບຄືກັບທ່ານກຳລັງລົມກັບຕົນເອງ ເຊັ່ນ ທ່ານຄິດແນວໃດເມື່ອທ່ານໄດ້ຮັບຄຳຖາມ ຄຳຖາມເຮັດໃຫ້ເຮົາຄິດຫາຫຍັງແດ່ ທ່ານຕ້ອງການຕອບຄຳຖາມເຫຼົ່ານີ້ແນວໃດ ທ່ານໄດ້ຄຳຕອບມາໄດ້ແນວໃດ ເຮົາຈະຍົກຕົວຢ່າງໃຫ້ທ່ານໜຶ່ງຕົວຢ່າງເມື່ອໃຫ້ທ່ານສາມາດເຂົ້າໃຈການສຳພາດໃນລັກຊະນະນີ້ຫຼາຍຂຶ້ນ.

ຍົກຕົວຢ່າງ ຖ້າເຮົາຕ້ອງຕອບຄຳຖາມວ່າ ທ່ານເບິ່ງເຫັນຫຍັງແດ່ຖ້າທ່ານເດີນທາງຈາກເຮືອນຫວັດທີ່ໃກ້ທີ່ສຸດ ແລະເຮົາຕ້ອງບັນລະຍາຍຄວາມຄິດຂອງເຮົາໃຫ້ທ່ານຟັງເຮົາຈະເວົ້າວ່າ “[ຜູ້ສຳພາດບັນຍາຍການເດີນທາງໃນໝູ່ບ້ານຂອງຕົນເອງ]” ເຊິ່ງເປັນພຽງໜຶ່ງໃນຫຼາກຫຼາຍວິທີທີ່ທ່ານສາມາດໃຊ້ໄດ້ ສິ່ງທີ່ສຳຄັນທີ່ສຸດກ່ຽວກັບການຄິດອອກສຽງຂອງທ່ານຄຳຕອບຂອງທ່ານຈະບໍ່ຖືກຕັດສິນວ່າຖືກຫຼືຜິດ ເພາະສິ່ງທີ່ເຮົາຕ້ອງການຮຽນຮູ້ຫຼາຍທີ່ສຸດມາມຸມມອງແລະວິທີການຄິດຂອງທ່ານ ແລະມັນແມ່ນສິ່ງທີ່ເຮົາຍາກໃຫ້ທ່ານແບ່ງປັນກັບເຮົາ ດັ່ງນັ້ນເຮົາຈຶ່ງຂໍໃຫ້ທ່ານລອງຄິດອອກສຽງກັບເຮົາໃນຄຳຖາມຕໍ່ໄປນີ້

Guiding question: Is the respondent comfortable with the “think aloud” technique? ຄຳຄາມນຳ: ຜູ້ໃຫ້ສັມພາບສາມາດໃຊ້ເຕັກນິກຄາລິດອອກເສຍຫຼືບໍ່ ຄຳຖາມນຳ: ຜູ້ໃຫ້ສຳພາດໃຊ້ເຕັກນິກການຄິດອອກສຽງຫຼືບໍ່

- I would like you to imagine your village. Could you please describe to me what you see when you go from your home to the nearest temple, in as much detail as you can? ເຮາວອາໄຫ້ທ່ານນິກາພາບໝູ່ບ້ານຂອງທ່ານແລະບອກໃຫ້ເຮົາຟັງວ່າທ່ານເຫັນອະໄພເມື່ອທ່ານເດີນທາງຈາກບ້ານຂອງທ່ານໄປຍັງວັດທີ່ໃກ້ທີ່ສຸດ ໂດຍໃຊ້ລາຍລະອຽດທີ່ສຸດເທົ່າທີ່ທ່ານສາມາດເຮັດໄດ້ ເຮົາຂໍໃຫ້ທ່ານນິກາພາບໝູ່ບ້ານຂອງທ່ານແລະບັນຍາຍໃຫ້ເຮົາຟັງວ່າທ່ານເຫັນຫຍັງເມື່ອທ່ານເດີນທາງຈາກເຮືອນຂອງທ່ານໄປຫວັດທີ່ໃກ້ທີ່ສຸດ ໂດຍໃຊ້ລາຍລະອຽດຫຼາຍທີ່ສຸດທີ່ທ່ານສາມາດເຮັດໄດ້

Before we start, I'd like to give you another example that is more closely related to the actual questions from our questionnaire. Say you ask me to list all persons age ≥18 years in my household with their sex and age, I'd go [interviewer answering question about adults in household]. ກ່ອນທີ່ເຮົາຈະເລີ່ມ ເຮົາຈະອອກຄຳວ່າທີ່ໃກ້ຄືກັບຄຳຄາມຈິງກັບແບບສອບຖາມຂອງເຮົາ ໃຫ້ທ່ານອີກໜຶ່ງຄັ້ງ ສນມຕິທ່ານຂໍໃຫ້ເຮົາອອກຂໍ້ມູນຂອງສມາຊິກອາຍຸ 18 ປີຫຼືເກີນກວ່າ ທີ່ອາໄສຢູ່ໃນຄວາມຮຽນນີ້ທຸກຄົນ ຮວມທັງເພດແລະອາຍຸ ເຮົາຈະທຸລາວາ “[ຜູ້ສັມພາບໃຫ້ຄຳຕອບເຄື່ອນກັບສມາຊິກໃນຄວາມຮຽນຂອງຕົນເອງ].” ກ່ອນທີ່ເຮົາຈະເລີ່ມເຮົາຂໍຍົກຕົວຢ່າງທີ່ຄ້າຍກັນກັບແບບສອບຖາມຂອງເຮົາ ສົມມຸດທຳບອກໃຫ້ເຮົາບອກຂໍ້ມູນຂອງຊະນະຊິກອາຍຸ 18 ປີຫຼືຫຼາຍກວ່າ ທີ່ອາໄສຢູ່ໃນຄົວເຮືອນນີ້ທຸກຄົນ ລວມເຖິງເພດແລະອາຍຸ ເຮົາຈະເວົ້າວ່າ “[ຜູ້ສຳພາດໃຫ້ຄຳຕອບກ່ຽວກັບສະມາຊິກໃນຄົວເຮືອນຂອງຕົນເອງ]”

List all persons aged 18+ years in household ກອກຂໍ້ມູນຂອງສມາຊິກອາຍຸ 18 ປີຫຼືເກີນກວ່າ ທີ່ອາໄສຢູ່ໃນຄວາມຮຽນນີ້ ໃສ່ຂໍ້ມູນຂອງຊະນະຊິກອາຍຸ 18 ປີຫຼືຫຼາຍກວ່າ ທີ່ອາໄສຢູ່ຄົວເຮືອນນີ້

[1 respondent per every 5 household members will be selected randomly from this list] [ຕົວແທນ 1 ຄົນຕໍ່ສມາຊິກຈຳນວນ 5 ຄົນ ຈະຖືກສຸ່ມເລືອກໃຫ້ເຂົ້າຮ່ວມການສຳພາດ]

| Name ຊື່ ຊື່ | Sex ເພດ ເພດ<br>(M / F) (ຜ/ຍຸ) (ຊ/ຍ) | Age ອາຍຸ ອາຍຸ<br>(in completed Years) (ຈຳນວນປີເຕັມ)<br>(ຈຳນວນປີເຕັມ) | Available for interview today ຜູ້ເຂົ້າຮ່ວມສາມາດໃຫ້ສັມພາບໃນວັນນີ້<br>ຫຼືບໍ່ ຜູ້ເຂົ້າຮ່ວມສາມາດໃຫ້ສັມພາດໃນມື້ນີ້ໄດ້ຫຼືບໍ່?<br>(Yes / No) (ໄ/ບໍ່ໄ) (ແມ່ນ/ບໍ່ແມ່ນ) |
|--------------|-------------------------------------|----------------------------------------------------------------------|---------------------------------------------------------------------------------------------------------------------------------------------------------------|
|              |                                     |                                                                      |                                                                                                                                                               |
|              |                                     |                                                                      |                                                                                                                                                               |
|              |                                     |                                                                      |                                                                                                                                                               |

**Part III – Social-Network-Related Survey Questions ສ່ວນທີ່ 3 – ຄຳຄາມເຄື່ອນກັບເສືອນສັງຄົມ ສ່ວນທີ່ 3 - ຄຳຖາມກ່ຽວກັບເສືອນສັງຄົມ**

I will now ask you some questions about your interactions with other people within and outside of your village. ເຮາວຈະເລີ່ມ ໂດຍການຄາມທ່ານເຄື່ອນກັບປະຊາກອນຂອງທ່ານກັບບ້ານອື່ນໆ ທັງໃນແລະນອກໝູ່ບ້ານ ເຮົາຈະເລີ່ມໂດຍການຖາມຄຳຖາມທ່ານກ່ຽວກັບການພົວພັນຂອງທ່ານກັບຊາວບ້ານອື່ນໆ ທັງໃນແລະນອກໝູ່ບ້ານ

- What are you thinking about when you hear the following question? ທ່ານມີຄວາມຄິດອະໄພເມື່ອທ່ານໄດ້ຍິນຄຳຄາມຕໍ່ໄປນີ້ ທ່ານມີຄວາມຄິດຫຍັງແດ່ເມື່ອທ່ານໄດ້ຍິນຄຳຖາມຕໍ່ໄປນີ້

|                                                                                                                                                                                                                                                                                                                                                                                                                                                                                                                                                                                                                                     |                                                                                                                                                                                                                                                                                                                                                                                                                                                                                                                                                                                                                                                                                                                                                            |
|-------------------------------------------------------------------------------------------------------------------------------------------------------------------------------------------------------------------------------------------------------------------------------------------------------------------------------------------------------------------------------------------------------------------------------------------------------------------------------------------------------------------------------------------------------------------------------------------------------------------------------------|------------------------------------------------------------------------------------------------------------------------------------------------------------------------------------------------------------------------------------------------------------------------------------------------------------------------------------------------------------------------------------------------------------------------------------------------------------------------------------------------------------------------------------------------------------------------------------------------------------------------------------------------------------------------------------------------------------------------------------------------------------|
| <p>1 Where do you spend most of your time<br/>2 interacting with other people from your<br/>3 village? <i>ທ່ານໃຊ້ເວລາສ່ວນໃຫຍ່ໃນການພົວພັນຢູ່ກັບບ້ານໃນ</i><br/>4 <i>ໜູ່ບ້ານຂອງທ່ານໃນສະຖານທີ່ໃດ ທ່ານໃຊ້ເວລາຫຼາຍທີ່ສຸດໃນການ</i><br/>5 <i>ພົວພັນຢູ່ກັບຊາວບ້ານໃນໝູ່ບ້ານຂອງທ່ານໃນບ່ອນໃດ</i><br/>6 <i>ແດ່</i></p> <p>7<br/>8<br/>9 <b>[mark all that apply or select 99 if respondent</b><br/>10 <b>indicates no noteworthy interaction]</b> <i>[ຕອບໄດ້</i><br/>11 <i>ຫຼາຍກວ່າ 1 ຕົວເລືອກ ຫຼືເລືອກ 99 ຫາກໄດ້ປະຕິບັດທີ່ເປັນຈຸດປາກົດ]</i><br/>12 <i>[ຕອບໄດ້ຫຼາຍກວ່າ 1 ຕົວເລືອກ ຫຼືເລືອກ 99 ຖ້າບໍ່ມີການ</i><br/>13 <i>ພົວພັນທີ່ຊັດເຈນ]</i></p> | <p>Field (specify) ໄຮ່ນາ (ໂປຣຣະນຸ) ໄຮ່ນາ (ກະລຸນາບອກ) _____ 1</p> <p>Temple (specify) ວັດ (ໂປຣຣະນຸ) ວັດ (ກະລຸນາບອກ) _____ 2</p> <p>Local store (specify) ຮ້ານຄ້າ (ໂປຣຣະນຸ) ຮ້ານຄ້າ (ກະລຸນາບອກ) _____ 3</p> <p>Market (specify) ຕະຫຼາດ (ໂປຣຣະນຸ) ຕະຫຼາດ (ກະລຸນາບອກ) _____ 4</p> <p>Children’s schools (specify) ໂຮງຮຽນຂອງນັກສູນ (ໂປຣຣະນຸ) ໂຮງຮຽນຂອງລູກ (ກະລຸນາບອກ) _____ 5</p> <p>Home (specify) ທີ່ບ້ານ (ໂປຣຣະນຸ) ເຮືອນ (ກະລຸນາບອກ) _____ 6</p> <p>Workplace (specify) ທີ່ທຳການ (ໂປຣຣະນຸ) ບ່ອນເຮັດວຽກ (ກະລຸນາບອກ) _____ 7</p> <p>Other site (specify) ອື່ນໆ (ໂປຣຣະນຸ) ອື່ນໆ (ກະລຸນາບອກ) _____ 8</p> <p>I don’t interact notably with others <i>ໄດ້ມີການພົວພັນທີ່ເຫັນຮູ້ກັບບ້ານຄົນອື່ນໆ</i><br/><i>ບໍ່ມີການພົວພັນທີ່ຊັດເຈນກັບຊາວບ້ານຄົນອື່ນໆ</i>..... 99</p> |
|-------------------------------------------------------------------------------------------------------------------------------------------------------------------------------------------------------------------------------------------------------------------------------------------------------------------------------------------------------------------------------------------------------------------------------------------------------------------------------------------------------------------------------------------------------------------------------------------------------------------------------------|------------------------------------------------------------------------------------------------------------------------------------------------------------------------------------------------------------------------------------------------------------------------------------------------------------------------------------------------------------------------------------------------------------------------------------------------------------------------------------------------------------------------------------------------------------------------------------------------------------------------------------------------------------------------------------------------------------------------------------------------------------|

- a. How do you understand “interacting?” ສຳລັບທ່ານ ທ່ານຄິດວ່າຄຳວ່າ “ພົວພັນຢູ່ກັນ” ມີຄວາມໝາຍວ່າແນວໃດ ສຳລັບທ່ານ ທ່ານຄິດວ່າ “ການພົວພັນຢູ່ກັນ” ມີຄວາມໝາຍວ່າແນວໃດ
- b. What does “most of your time” mean to you? Which time frame did you have in mind? ຄຳວ່າ “ເວລາສ່ວນໃຫຍ່” ສຳລັບທ່ານມີຄວາມໝາຍວ່າແນວໃດ ໃນຂະນະທີ່ທ່ານຕອບຄຳຖາມໃນໃຈຂອງທ່ານນັກເຖິງຊ່ວງເວລາໃດ ຄຳວ່າ “ເວລາຫຼາຍທີ່ສຸດ” ສຳລັບທ່ານມີຄວາມໝາຍວ່າແນວໃດ
- c. What are the possible places where people spend time together? ມີທີ່ໃດບ່ອນທີ່ບ້ານສາມາດໃຊ້ເວລາຮ່ວມກັນໄດ້ ມີບ່ອນໃດແດ່ທີ່ຊາວບ້ານສາມາດໃຊ້ເວລາຮ່ວມກັນໄດ້
- d. Please ask us the same question in your own words. ກະລຸນາຖາມຄຳຖາມນີ້ກັບເຮົາໂດຍໃຊ້ຄຳເວົ້າໃນແບບຂອງທ່ານເອງ
- e. What kind of things do you normally talk about when you interact with other villagers? ໂດຍປົກກະຕິເມື່ອທ່ານພົວພັນຢູ່ກັບບ້ານຄົນອື່ນໆ ທ່ານສາມາດເວົ້າເຖິງຫຍັງແດ່



ANTIBIOTICS AND ACTIVITY SPACES

6. I will now ask you a set of questions, regarding the people you interact with. **ชุดคำถามต่อไปจะถามถึงบุคคลที่ท่านพบปะพูดคุยด้วย** ชุดคำถามต่อไปจะถามถึงบุคคลที่ท่านพบปะพูดคุยด้วย

| With whom do you interact on a regular basis? <b>โดยปกติในชีวิตประจำวันท่านพบปะพูดคุยกับใครบ้าง</b> โดยปกติในชีวิตประจำวันท่านพบปะพูดคุยกับใครบ้าง |                                                                                                                                                                                                                                                                                                                                                                    |                                                          |                                                                                                                                                                                                                                   |                                                                                                               |                                                                                                                                                                                                                                                                       |                                                                                                                                                     |                                                                                                                                                                                                                                                                                                                   |                                                                                                                                                                                                                                                                                                                                                                                               |  |
|----------------------------------------------------------------------------------------------------------------------------------------------------|--------------------------------------------------------------------------------------------------------------------------------------------------------------------------------------------------------------------------------------------------------------------------------------------------------------------------------------------------------------------|----------------------------------------------------------|-----------------------------------------------------------------------------------------------------------------------------------------------------------------------------------------------------------------------------------|---------------------------------------------------------------------------------------------------------------|-----------------------------------------------------------------------------------------------------------------------------------------------------------------------------------------------------------------------------------------------------------------------|-----------------------------------------------------------------------------------------------------------------------------------------------------|-------------------------------------------------------------------------------------------------------------------------------------------------------------------------------------------------------------------------------------------------------------------------------------------------------------------|-----------------------------------------------------------------------------------------------------------------------------------------------------------------------------------------------------------------------------------------------------------------------------------------------------------------------------------------------------------------------------------------------|--|
| a) What is the name of the person?<br><small>ชื่อ</small>                                                                                          | b) How is this person related to you?<br><small>ความสัมพันธ์กับท่าน</small><br><i>[give examples if respondent is unsure about answer categories]</i><br><small>[หากผู้ให้สัมภาษณ์ไม่แน่ใจในหมวดคำตอบให้ยกตัวอย่างคำตอบได้]</small><br><small>[ถ้าผู้ใช้ไม่สามารถระบุชื่อได้ในหมวดคำตอบ ใช้ยี่สิบตัวอักษรมาตอบได้]</small>                                         | c) What is the sex of this person?<br><small>เพศ</small> | d) Where does this person live?<br><small>ที่อยู่</small>                                                                                                                                                                         | e) What is the name of the household head of this person?<br><small>ใครคือหัวหน้าครัวเรือนของบุคคลนี้</small> | f) How often do you interact with this person?<br><small>ท่านพบปะพูดคุยกับบุคคลนี้บ่อยเท่าใด</small><br><small>ท่านพบปะพูดคุยกับบุคคลนี้บ่อยปานใด</small>                                                                                                             | g) How do you interact with this person?<br><small>ท่านพบปะพูดคุยกับบุคคลนี้อย่างไร</small><br><small>ท่านพบปะพูดคุยกับบุคคลนี้บ่อยปานใด</small>    | h) How often do your conversations relate to health and well-being?<br><small>ท่านมีการสนทนากับบุคคลนี้เกี่ยวกับเรื่องสุขภาพบ่อยเท่าใด</small><br><small>ท่านสนทนากับบุคคลนี้เกี่ยวกับเรื่องสุขภาพบ่อยปานใด</small>                                                                                               | i) What health-related subjects do your conversations cover?<br><small>หัวข้อการสนทนาเกี่ยวกับสุขภาพของท่านกับบุคคลนี้คือเรื่องอะไร</small><br><small>หัวข้อสนทนาที่เกี่ยวกับสุขภาพของท่านกับบุคคลนี้</small>                                                                                                                                                                                 |  |
| Contact 1<br>คนที่ 1<br>ลินท์ 1<br>Name<br>ชื่อ                                                                                                    | Spouse คู่สมรส คู่แต่งงาน..... 1<br>Parent บิด มารดา ฝั่งแม่..... 2<br>Child บุตร ลูก..... 3<br>Sibling พี่น้อง อ้ายน้อง..... 4<br>Other relative ย่า ตายาย..... 5<br>Neighbour เพื่อนบ้าน ฝั่งบ้าน..... 6<br>Friend (if not neighbour) เพื่อน (ที่ไม่ใช่เพื่อนบ้าน) ฝั่ง..... 7<br>Other villager ชาวบ้านคนอื่น..... 8<br>Other (specify) อื่นๆ (โปรดระบุ)..... 9 | Female...1<br>หญิง..... 1<br>Male.....2<br>ชาย..... 2    | In village .....1<br>(specify: _____)<br>ในหมู่บ้าน..... 1<br>(โปรดระบุ: _____)<br>ในหมู่บ้าน (ระบุหมู่บ้าน)<br>Outside village ...2<br>(specify: _____)<br>นอกหมู่บ้าน..... 2<br>(โปรดระบุ: _____)<br>นอกหมู่บ้าน (ระบุหมู่บ้าน) | Name of household head ชื่อหัวหน้าครัวเรือน:<br>ชื่อ.....                                                     | Daily or more often ทุกวันหรือบ่อยกว่า..... 4<br>Weekly or few times/week ทุกสัปดาห์หรือมากกว่าหนึ่งครั้งต่อสัปดาห์..... 3<br>Monthly or few times/month ทุกเดือนหรือมากกว่าหนึ่งครั้งต่อเดือน..... 3<br>Yearly or few times/year ปีหรือมากกว่าหนึ่งครั้งต่อปี..... 1 | Face-to-face ทั่วหน้า..... 1<br>Voice call โทรศัพท์..... 2<br>Messenger คัดลอกข้อความโดยอัตโนมัติ..... 3<br>Other (specify) อื่นๆ (โปรดระบุ)..... 4 | Always (100%) เป็นประจำ (100%) .. 5<br>Nearly always (<100%) เกือบเป็นประจำ (<100%) .. 4<br>Often (<90%) บ่อยครั้ง (<90%) .. 3<br>Sometimes (<50%) บางครั้ง (<50%) .. 2<br>Hardly ever (<10%) แทบไม่เคย (<10%) .. 1<br>Never (0%) ไม่เคย (0%) .. 0<br>→ [go to next contact] [ข้ามไปบุคคลต่อไป] [ข้ามไปบุคคลอื่น] | Talk about general well-being ไม่ถามสารทุกข์สุกดิบทั่วไป..... 1<br>Update on health knowledge/news ข่าวสารสุขภาพใหม่ๆ..... 2<br>Update on personal health status อัปเดตเรื่องสุขภาพส่วนตัว..... 3<br>Advice on diagnosis ให้คำแนะนำเกี่ยวกับการวินิจฉัย..... 4<br>Advice on doctors ให้คำแนะนำเกี่ยวกับแพทย์..... 5<br>Advice on treatment/medicine ให้คำแนะนำเกี่ยวกับวิธีการรักษา/ยา..... 6 |  |

BMJ Open  
ANTIBIOTICS AND ACTIVITY SPACES

|    |                      |           |                   |     |     |                                                                  |           |         |                                                                                              |                   |
|----|----------------------|-----------|-------------------|-----|-----|------------------------------------------------------------------|-----------|---------|----------------------------------------------------------------------------------------------|-------------------|
| 1  |                      |           |                   |     |     | Less often or never ไม่ค่อยบ่อย<br>หรือไม่เคยเลย บ่อยน้อย .....0 |           |         | Emotional support/reassure ให้กำลังใจ ให้ความมั่นใจ ใช้กำลัง<br>จิตใจ ใช้ความมั่นใจ .....7   |                   |
| 2  |                      |           |                   |     |     |                                                                  |           |         | Provide help during illness ให้ความช่วยเหลือระหว่างการป่วย<br>ใช้ความช่วยเหลือตอนป่วย .....8 |                   |
| 3  |                      |           |                   |     |     |                                                                  |           |         | Other (specify) อื่นๆ (โปรดระบุ) อื่นๆ (ระบุนอก) ____ .9                                     |                   |
| 4  | Contact 2            | Name ชื่อ | 1 2 3 4 5 6 7 8 9 | 1 2 | 1 2 | Name ชื่อ                                                        | 0 1 2 3 4 | 1 2 3 4 | 0 1 2 3 4 5                                                                                  | 1 2 3 4 5 6 7 8 9 |
| 5  | คนที่ 2              | ชื่อ      |                   |     |     | ชื่อ                                                             |           |         |                                                                                              |                   |
| 6  | คนที่ 2              | ชื่อ      |                   |     |     | ชื่อ                                                             |           |         |                                                                                              |                   |
| 7  | [continue            |           |                   |     |     |                                                                  |           |         |                                                                                              |                   |
| 8  | until Contact        |           |                   |     |     |                                                                  |           |         |                                                                                              |                   |
| 9  | x                    |           |                   |     |     |                                                                  |           |         |                                                                                              |                   |
| 10 | maximum 10           |           |                   |     |     |                                                                  |           |         |                                                                                              |                   |
| 11 | contacts]            |           |                   |     |     |                                                                  |           |         |                                                                                              |                   |
| 12 | [บันทึกบุคคลที่มี    |           |                   |     |     |                                                                  |           |         |                                                                                              |                   |
| 13 | ความเกี่ยวข้อง       |           |                   |     |     |                                                                  |           |         |                                                                                              |                   |
| 14 | ระหว่างการเจ็บป่วย   | Name ชื่อ | 1 2 3 4 5 6 7 8 9 | 1 2 | 1 2 | Name ชื่อ                                                        | 0 1 2 3 4 | 1 2 3 4 | 0 1 2 3 4 5                                                                                  | 1 2 3 4 5 6 7 8 9 |
| 15 | ทุกคน ไม่เกิน 10 คน] | ชื่อ      |                   |     |     | ชื่อ                                                             |           |         |                                                                                              |                   |
| 16 | [บันทึกบุคคลที่มี    |           |                   |     |     |                                                                  |           |         |                                                                                              |                   |
| 17 | ความเกี่ยวข้อง       |           |                   |     |     |                                                                  |           |         |                                                                                              |                   |
| 18 | ระหว่างการเจ็บป่วย   |           |                   |     |     |                                                                  |           |         |                                                                                              |                   |
| 19 | ทุกคน ไม่เกิน 10 คน] |           |                   |     |     |                                                                  |           |         |                                                                                              |                   |
| 20 | [บันทึกบุคคลที่มี    |           |                   |     |     |                                                                  |           |         |                                                                                              |                   |
| 21 | ความเกี่ยวข้อง       |           |                   |     |     |                                                                  |           |         |                                                                                              |                   |
| 22 | ระหว่างการเจ็บป่วย   |           |                   |     |     |                                                                  |           |         |                                                                                              |                   |
| 23 | ทุกคน ไม่เกิน 10 คน] |           |                   |     |     |                                                                  |           |         |                                                                                              |                   |
| 24 | [บันทึกบุคคลที่มี    |           |                   |     |     |                                                                  |           |         |                                                                                              |                   |
| 25 | ความเกี่ยวข้อง       |           |                   |     |     |                                                                  |           |         |                                                                                              |                   |
| 26 | ระหว่างการเจ็บป่วย   |           |                   |     |     |                                                                  |           |         |                                                                                              |                   |
| 27 | ทุกคน ไม่เกิน 10 คน] |           |                   |     |     |                                                                  |           |         |                                                                                              |                   |
| 28 | [บันทึกบุคคลที่มี    |           |                   |     |     |                                                                  |           |         |                                                                                              |                   |
| 29 | ความเกี่ยวข้อง       |           |                   |     |     |                                                                  |           |         |                                                                                              |                   |
| 30 | ระหว่างการเจ็บป่วย   |           |                   |     |     |                                                                  |           |         |                                                                                              |                   |
| 31 | ทุกคน ไม่เกิน 10 คน] |           |                   |     |     |                                                                  |           |         |                                                                                              |                   |
| 32 | [บันทึกบุคคลที่มี    |           |                   |     |     |                                                                  |           |         |                                                                                              |                   |
| 33 | ความเกี่ยวข้อง       |           |                   |     |     |                                                                  |           |         |                                                                                              |                   |
| 34 | ระหว่างการเจ็บป่วย   |           |                   |     |     |                                                                  |           |         |                                                                                              |                   |
| 35 | ทุกคน ไม่เกิน 10 คน] |           |                   |     |     |                                                                  |           |         |                                                                                              |                   |
| 36 | [บันทึกบุคคลที่มี    |           |                   |     |     |                                                                  |           |         |                                                                                              |                   |
| 37 | ความเกี่ยวข้อง       |           |                   |     |     |                                                                  |           |         |                                                                                              |                   |
| 38 | ระหว่างการเจ็บป่วย   |           |                   |     |     |                                                                  |           |         |                                                                                              |                   |
| 39 | ทุกคน ไม่เกิน 10 คน] |           |                   |     |     |                                                                  |           |         |                                                                                              |                   |
| 40 | [บันทึกบุคคลที่มี    |           |                   |     |     |                                                                  |           |         |                                                                                              |                   |
| 41 | ความเกี่ยวข้อง       |           |                   |     |     |                                                                  |           |         |                                                                                              |                   |
| 42 | ระหว่างการเจ็บป่วย   |           |                   |     |     |                                                                  |           |         |                                                                                              |                   |
| 43 | ทุกคน ไม่เกิน 10 คน] |           |                   |     |     |                                                                  |           |         |                                                                                              |                   |
| 44 | [บันทึกบุคคลที่มี    |           |                   |     |     |                                                                  |           |         |                                                                                              |                   |
| 45 | ความเกี่ยวข้อง       |           |                   |     |     |                                                                  |           |         |                                                                                              |                   |
| 46 | ระหว่างการเจ็บป่วย   |           |                   |     |     |                                                                  |           |         |                                                                                              |                   |



- a. How did you go about answering these questions? *ທ່ານມີວິທີການຕອບຄຳຖາມເຫຼົ່ານີ້ແນວໃດ*
- b. What did you imagine while answering the question, e.g. the “interaction setting” that you had in mind? *ໃນຂະນະທີ່ທ່ານຕອບຄຳຖາມເຫຼົ່ານີ້ທ່ານມີຄຳພະໂອ້ນໃຈ ເຊັ່ນ ລັກສະນະຂອງສະຖານທີ່ ຯລຯ ໃນຂະນະທີ່ທ່ານຕອບຄຳຖາມເຫຼົ່ານີ້ທ່ານມີພາບຫຍັງຢູ່ໃຈເຊັ່ນ ລັກສະນະຂອງສະຖານທີ່ ແລະອື່ນໆ*
- c. What time period were you thinking of? *ຈາກຄຳຕອບທີ່ທ່ານໃຫ້ເຮົາເຖິງຄຳບຸກຄົນທີ່ທ່ານມີປະຕິສຳພັນນຳ ທ່ານນຶກເຖິງຊ່ວງເວລາໃດ ທ່ານໃຫ້ເຮົາກ່ຽວກັບບຸກຄົນທີ່ທ່ານມີປະຕິສຳພັນນຳ ທ່ານນຶກເຖິງຊ່ວງເວລາໃດ*
- d. How did you come up with the order of people? Why did you think of these people first rather than others? *ທ່ານມີການເຮັດລຳດັບບຸກຄົນເຫຼົ່ານີ້ແນວໃດ ເພາະເຫຼົ່າໃດທ່ານຈື່ນອກຊື່ບຸກຄົນເຫຼົ່ານັ້ນເປັນລຳດັບແກ່ກາ ຫາກເຮົາເຮັດສູນກັບບຸກຄົນອື່ນ ທ່ານມີການລຽງລຳດັບບຸກຄົນເຫຼົ່ານີ້ແນວໃດ ຍ້ອນຫຍັງທ່ານຈື່ບຸກຄົນເຫຼົ່ານີ້ກ່ອນຄົນອື່ນ*
- e. What is the best way we can find these people from your interaction circle? How would you describe where they live? *ຫາກເຮົາຕ້ອງການພົບບຸກຄົນທີ່ທ່ານກ່າວເຖິງເຫຼົ່ານີ້ ເຮົາສາມາດພົບພວກເຂົາໄດ້ແນວໃດ ທ່ານສາມາດອະທິບາຍທີ່ຢູ່ຂອງພວກເຂົາໄດ້ແນວໃດ*

**Part IV – Health-Related Survey Questions ສ່ວນທີ່ 4 – ຄຳຖາມເຖິງຄຳບຸກຄົນ ສ່ວນທີ່ 4 - ຄຳຖາມກ່ຽວກັບສຸຂະພາບ**

*Thank you for this. Now we come to a part where I will ask you some questions about health and health providers around here. ຂອບຄຸມຄຣັບ/ຄະ ຄຳຖາມຊ່ວງຕໍ່ໄປຈະເປັນເລື່ອງສຸຂະພາບແລະສະຖານບໍລິການສຸຂະພາບໃນພື້ນທີ່ນີ້ ຂອບໃຈ ຄຳຖາມຕໍ່ໄປນີ້ຈະເປັນຄຳຖາມກ່ຽວກັບສຸຂະພາບ ແລະສະຖານບໍລິການສຸຂະພາບໃນພື້ນທີ່ນີ້*

7. For the following question, can you please “think out loud” about your answers? *ເຮົາຂໍໃຫ້ທ່ານ “ຄິດອອກສຽງ” ໃນຂະນະທີ່ທ່ານຕອບຄຳຖາມຕໍ່ໄປນີ້ ທ່ານຕອບຄຳຖາມຕໍ່ໄປນີ້ ເຮົາຂໍໃຫ້ທ່ານ “ຄິດອອກສຽງ” ໃນຂະນະທີ່ທ່ານຕອບຄຳຖາມຕໍ່ໄປນີ້*

|                                                                                                                                                                                                                                                                                                                                                                                                                                                                         |                                                                                                                                   |                                                                                                                                                                                                                                                                                                                                                            |
|-------------------------------------------------------------------------------------------------------------------------------------------------------------------------------------------------------------------------------------------------------------------------------------------------------------------------------------------------------------------------------------------------------------------------------------------------------------------------|-----------------------------------------------------------------------------------------------------------------------------------|------------------------------------------------------------------------------------------------------------------------------------------------------------------------------------------------------------------------------------------------------------------------------------------------------------------------------------------------------------|
| I would now like to ask you about the sources of health advice and medicine or other treatment that are available to you. Please think about all the places where you can go to get advice, treatment, or drugs if you (or your children) are sick. ຄຳຖາມຕໍ່ໄປເປັນຄຳຖາມເຖິງສະຖານທີ່ ຫຼື ບຸກຄົນທີ່ທ່ານສາມາດຮັບຄຳປຶກສາ ຮັບຮ້າງ ຫຼື ຮັບການຮັກສາອື່ນໆ ໄດ້ ກະລຸນານຶກເຖິງສະຖານທີ່ ຫຼື ບຸກຄົນທີ່ທ່ານສາມາດຮັບຄຳປຶກສາ ຮັບຮ້າງ ຫຼື ຮັບຮ້າງ ຖ້າຫາກທ່ານ ຫຼື ເດັກທີ່ທ່ານດູແລບໍ່ສະຍາຍ | Drug dispensary, other local store selling medicine ຮ້ານຂາຍ ຂອງຮ້ານ ຫຼື ຮ້ານຄ້າທຸກໆພື້ນທີ່ ທີ່ມີການຈຳນ່າຍ ຮ້ານທົ່ວໄປທີ່ມີການຂາຍຢາ | Medical treatment ເພື່ອການຮັກສາ ສຳລັບການປິ່ນປົວ..... 1<br>Medical advice ເພື່ອຄຳແນະນຳໃນການຮັກສາ ສຳລັບຄຳແນະນຳໃນການປິ່ນປົວ ..... 2<br>Access to medicine ເພື່ອຮ້ອ/ຮັບຮ້າງ ສຳລັບຊື້/ຮັບຮ້າງ..... 3<br>Don't consider this provider ໃນການໃຊ້ບໍລິການປະເພດນີ້ ບໍ່ມີການໃຊ້ບໍລິການປະເພດນີ້.. 0<br>Don't know such a provider ໃນການຮູ້ຈັກຜູ້ໃຫ້ບໍລິການປະເພດນີ້.. 99 |
|                                                                                                                                                                                                                                                                                                                                                                                                                                                                         | Traditional healer ພອ ຂາວບ້ານ ພັນຊາວບ້ານ                                                                                          | Medical treatment ເພື່ອການຮັກສາ ສຳລັບການປິ່ນປົວ..... 1<br>Medical advice ເພື່ອຄຳແນະນຳໃນການຮັກສາ ສຳລັບຄຳແນະນຳໃນການປິ່ນປົວ ..... 2<br>Access to medicine ເພື່ອຮ້ອ/ຮັບຮ້າງ ສຳລັບຊື້/ຮັບຮ້າງ..... 3<br>Don't consider this provider ໃນການໃຊ້ບໍລິການປະເພດນີ້ ບໍ່ມີການໃຊ້ບໍລິການປະເພດນີ້.. 0<br>Don't know such a provider ໃນການຮູ້ຈັກຜູ້ໃຫ້ບໍລິການປະເພດນີ້.. 99 |
|                                                                                                                                                                                                                                                                                                                                                                                                                                                                         | Pharmacist ເທສັກຮ ຜູ້ ຂາຍຢາ                                                                                                       | Medical treatment ເພື່ອການຮັກສາ ສຳລັບການປິ່ນປົວ..... 1<br>Medical advice ເພື່ອຄຳແນະນຳໃນການຮັກສາ ສຳລັບຄຳແນະນຳໃນການປິ່ນປົວ ..... 2<br>Access to medicine ເພື່ອຮ້ອ/ຮັບຮ້າງ ສຳລັບຊື້/ຮັບຮ້າງ..... 3<br>Don't consider this provider ໃນການໃຊ້ບໍລິການປະເພດນີ້ ບໍ່ມີການໃຊ້ບໍລິການປະເພດນີ້.. 0<br>Don't know such a provider ໃນການຮູ້ຈັກຜູ້ໃຫ້ບໍລິການປະເພດນີ້.. 99 |
|                                                                                                                                                                                                                                                                                                                                                                                                                                                                         | Private clinic ຄລີນິກເອກະ ຄລີນິກເອກະຊົນ                                                                                           | Medical treatment ເພື່ອການຮັກສາ ສຳລັບການປິ່ນປົວ..... 1<br>Medical advice ເພື່ອຄຳແນະນຳໃນການຮັກສາ ສຳລັບຄຳແນະນຳໃນການປິ່ນປົວ ..... 2<br>Access to medicine ເພື່ອຮ້ອ/ຮັບຮ້າງ ສຳລັບຊື້/ຮັບຮ້າງ..... 3<br>Don't consider this provider ໃນການໃຊ້ບໍລິການປະເພດນີ້ ບໍ່ມີການໃຊ້ບໍລິການປະເພດນີ້.. 0<br>Don't know such a provider ໃນການຮູ້ຈັກຜູ້ໃຫ້ບໍລິການປະເພດນີ້.. 99 |
| Which of the following options do you consider for medical treatment, advice, or to get medicine? ທ່ານເຮົາສາມາດຮັບຄຳປຶກສາ ຮັບຮ້າງ ຫຼື ຮັບຮ້າງ                                                                                                                                                                                                                                                                                                                           |                                                                                                                                   | Medical treatment ເພື່ອການຮັກສາ ສຳລັບການປິ່ນປົວ..... 1<br>Medical advice ເພື່ອຄຳແນະນຳໃນການຮັກສາ ສຳລັບຄຳແນະນຳໃນການປິ່ນປົວ ..... 2<br>Access to medicine ເພື່ອຮ້ອ/ຮັບຮ້າງ ສຳລັບຊື້/ຮັບຮ້າງ..... 3<br>Don't consider this provider ໃນການໃຊ້ບໍລິການປະເພດນີ້ ບໍ່ມີການໃຊ້ບໍລິການປະເພດນີ້.. 0<br>Don't know such a provider ໃນການຮູ້ຈັກຜູ້ໃຫ້ບໍລິການປະເພດນີ້.. 99 |

|                                                                                                                                                                                                                                                                                                                                                             |                                                                                                                                                                                                                                                                                                                                                             |                                                                                                                                                                                                                                                                                                                                                             |                                                                                                                                                                                                                                                                                                                                                             |
|-------------------------------------------------------------------------------------------------------------------------------------------------------------------------------------------------------------------------------------------------------------------------------------------------------------------------------------------------------------|-------------------------------------------------------------------------------------------------------------------------------------------------------------------------------------------------------------------------------------------------------------------------------------------------------------------------------------------------------------|-------------------------------------------------------------------------------------------------------------------------------------------------------------------------------------------------------------------------------------------------------------------------------------------------------------------------------------------------------------|-------------------------------------------------------------------------------------------------------------------------------------------------------------------------------------------------------------------------------------------------------------------------------------------------------------------------------------------------------------|
| 1<br>2<br>3<br>4<br>5<br>6<br>7<br>8<br>9<br>10<br>11<br>12<br>13<br>14<br>15<br>16<br>17<br>18<br>19<br>20<br>21<br>22<br>23<br>24<br>25<br>26<br>27<br>28<br>29<br>30<br>31<br>32<br>33<br>34<br>35<br>36<br>37<br>38<br>39<br>40<br>41<br>42<br>43<br>44<br>45<br>46<br>47<br>48<br>49<br>50<br>51<br>52<br>53<br>54<br>55<br>56<br>57<br>58<br>59<br>60 | 1<br>2<br>3<br>4<br>5<br>6<br>7<br>8<br>9<br>10<br>11<br>12<br>13<br>14<br>15<br>16<br>17<br>18<br>19<br>20<br>21<br>22<br>23<br>24<br>25<br>26<br>27<br>28<br>29<br>30<br>31<br>32<br>33<br>34<br>35<br>36<br>37<br>38<br>39<br>40<br>41<br>42<br>43<br>44<br>45<br>46<br>47<br>48<br>49<br>50<br>51<br>52<br>53<br>54<br>55<br>56<br>57<br>58<br>59<br>60 | 1<br>2<br>3<br>4<br>5<br>6<br>7<br>8<br>9<br>10<br>11<br>12<br>13<br>14<br>15<br>16<br>17<br>18<br>19<br>20<br>21<br>22<br>23<br>24<br>25<br>26<br>27<br>28<br>29<br>30<br>31<br>32<br>33<br>34<br>35<br>36<br>37<br>38<br>39<br>40<br>41<br>42<br>43<br>44<br>45<br>46<br>47<br>48<br>49<br>50<br>51<br>52<br>53<br>54<br>55<br>56<br>57<br>58<br>59<br>60 |                                                                                                                                                                                                                                                                                                                                                             |
|                                                                                                                                                                                                                                                                                                                                                             | 1<br>2<br>3<br>4<br>5<br>6<br>7<br>8<br>9<br>10<br>11<br>12<br>13<br>14<br>15<br>16<br>17<br>18<br>19<br>20<br>21<br>22<br>23<br>24<br>25<br>26<br>27<br>28<br>29<br>30<br>31<br>32<br>33<br>34<br>35<br>36<br>37<br>38<br>39<br>40<br>41<br>42<br>43<br>44<br>45<br>46<br>47<br>48<br>49<br>50<br>51<br>52<br>53<br>54<br>55<br>56<br>57<br>58<br>59<br>60 | 1<br>2<br>3<br>4<br>5<br>6<br>7<br>8<br>9<br>10<br>11<br>12<br>13<br>14<br>15<br>16<br>17<br>18<br>19<br>20<br>21<br>22<br>23<br>24<br>25<br>26<br>27<br>28<br>29<br>30<br>31<br>32<br>33<br>34<br>35<br>36<br>37<br>38<br>39<br>40<br>41<br>42<br>43<br>44<br>45<br>46<br>47<br>48<br>49<br>50<br>51<br>52<br>53<br>54<br>55<br>56<br>57<br>58<br>59<br>60 | 1<br>2<br>3<br>4<br>5<br>6<br>7<br>8<br>9<br>10<br>11<br>12<br>13<br>14<br>15<br>16<br>17<br>18<br>19<br>20<br>21<br>22<br>23<br>24<br>25<br>26<br>27<br>28<br>29<br>30<br>31<br>32<br>33<br>34<br>35<br>36<br>37<br>38<br>39<br>40<br>41<br>42<br>43<br>44<br>45<br>46<br>47<br>48<br>49<br>50<br>51<br>52<br>53<br>54<br>55<br>56<br>57<br>58<br>59<br>60 |
|                                                                                                                                                                                                                                                                                                                                                             | 1<br>2<br>3<br>4<br>5<br>6<br>7<br>8<br>9<br>10<br>11<br>12<br>13<br>14<br>15<br>16<br>17<br>18<br>19<br>20<br>21<br>22<br>23<br>24<br>25<br>26<br>27<br>28<br>29<br>30<br>31<br>32<br>33<br>34<br>35<br>36<br>37<br>38<br>39<br>40<br>41<br>42<br>43<br>44<br>45<br>46<br>47<br>48<br>49<br>50<br>51<br>52<br>53<br>54<br>55<br>56<br>57<br>58<br>59<br>60 | 1<br>2<br>3<br>4<br>5<br>6<br>7<br>8<br>9<br>10<br>11<br>12<br>13<br>14<br>15<br>16<br>17<br>18<br>19<br>20<br>21<br>22<br>23<br>24<br>25<br>26<br>27<br>28<br>29<br>30<br>31<br>32<br>33<br>34<br>35<br>36<br>37<br>38<br>39<br>40<br>41<br>42<br>43<br>44<br>45<br>46<br>47<br>48<br>49<br>50<br>51<br>52<br>53<br>54<br>55<br>56<br>57<br>58<br>59<br>60 | 1<br>2<br>3<br>4<br>5<br>6<br>7<br>8<br>9<br>10<br>11<br>12<br>13<br>14<br>15<br>16<br>17<br>18<br>19<br>20<br>21<br>22<br>23<br>24<br>25<br>26<br>27<br>28<br>29<br>30<br>31<br>32<br>33<br>34<br>35<br>36<br>37<br>38<br>39<br>40<br>41<br>42<br>43<br>44<br>45<br>46<br>47<br>48<br>49<br>50<br>51<br>52<br>53<br>54<br>55<br>56<br>57<br>58<br>59<br>60 |
|                                                                                                                                                                                                                                                                                                                                                             | 1<br>2<br>3<br>4<br>5<br>6<br>7<br>8<br>9<br>10<br>11<br>12<br>13<br>14<br>15<br>16<br>17<br>18<br>19<br>20<br>21<br>22<br>23<br>24<br>25<br>26<br>27<br>28<br>29<br>30<br>31<br>32<br>33<br>34<br>35<br>36<br>37<br>38<br>39<br>40<br>41<br>42<br>43<br>44<br>45<br>46<br>47<br>48<br>49<br>50<br>51<br>52<br>53<br>54<br>55<br>56<br>57<br>58<br>59<br>60 | 1<br>2<br>3<br>4<br>5<br>6<br>7<br>8<br>9<br>10<br>11<br>12<br>13<br>14<br>15<br>16<br>17<br>18<br>19<br>20<br>21<br>22<br>23<br>24<br>25<br>26<br>27<br>28<br>29<br>30<br>31<br>32<br>33<br>34<br>35<br>36<br>37<br>38<br>39<br>40<br>41<br>42<br>43<br>44<br>45<br>46<br>47<br>48<br>49<br>50<br>51<br>52<br>53<br>54<br>55<br>56<br>57<br>58<br>59<br>60 | 1<br>2<br>3<br>4<br>5<br>6<br>7<br>8<br>9<br>10<br>11<br>12<br>13<br>14<br>15<br>16<br>17<br>18<br>19<br>20<br>21<br>22<br>23<br>24<br>25<br>26<br>27<br>28<br>29<br>30<br>31<br>32<br>33<br>34<br>35<br>36<br>37<br>38<br>39<br>40<br>41<br>42<br>43<br>44<br>45<br>46<br>47<br>48<br>49<br>50<br>51<br>52<br>53<br>54<br>55<br>56<br>57<br>58<br>59<br>60 |

- Do you choose any of these providers for specific symptoms or illnesses? *ທ່ານມີການເລືອກສະຖານບໍລິການສຸຂະພາບແຕ່ລະຊະນິດໃດໜຶ່ງສໍາລັບກວດພະຍາດໂດຍສະເພາະຫຼືບໍ່*
- Do you think these questions are too hard? *ທ່ານຮູ້ສຶກວ່າຄໍາຖາມເຫຼົ່ານີ້ຍາກເກີນໄປຫຼືບໍ່*
- How big of an area do you think of when you answered these questions? E.g. within the village, the province, the surrounding provinces *ໃນພື້ນທີ່ທີ່ທ່ານຕອບຄໍາຖາມເຫຼົ່ານີ້ ທ່ານນຶກເຖິງສະຖານທີ່ບໍລິການສຸຂະພາບພາຍໃນບໍລິເວນໃດ ເຊັ່ນ ພາຍໃນໝູ່ບ້ານ ພາຍໃນແຂວງ ຫຼືແຂວງຮອບນອກ*
- Are there other forms of health provider that you could use but we have not talked about? *ມີສະຖານບໍລິການສຸຂະພາບອື່ນໆທີ່ທ່ານສາມາດໃຊ້ບໍລິການໄດ້ແຕ່ເຮົາຍັງບໍ່ໄດ້ເວົ້າເຖິງອີກຫຼືບໍ່*

8. I will now ask you another series of questions regarding a recent illness. *ຕໍ່ໄປນີ້ເຮົາຈະຖາມຄໍາຖາມກ່ຽວກັບການເຈັບເປັນຄັ້ງລ່າສຸດຂອງທ່ານ*

|                                                                                                                                                                                                                                                                                                                                                                                  |                                                                 |
|----------------------------------------------------------------------------------------------------------------------------------------------------------------------------------------------------------------------------------------------------------------------------------------------------------------------------------------------------------------------------------|-----------------------------------------------------------------|
| Did you have an acute illness (not a chronic, long-term condition that comes again and again) or an accident in the last two months? <i>ໃນຊ່ວງສອງເດືອນທີ່ຜ່ານມາ ທ່ານມີອາການປ່ວຍ (ໄມ້ລວມໂຮກເຮືອງຮຸ່ງຫວັດ ຫຼື ຫຼີກທີ່ເປັນໄປຕາມເວລາ) ຫຼື ປະສົບອຸບັດຕິເຫດ ຫຼື ບໍ່ ໃນຊ່ວງສອງເດືອນທີ່ຜ່ານມາ ທ່ານມີອາການເຈັບເປັນ (ບໍ່ລວມພະຍາດຊໍາເຮື້ອຫຼືພະຍາດທີ່ເປັນຕໍ່ເນື່ອງ) ຫຼື ອຸປະຕິເຫດຫຼືບໍ່?</i> | No <i>ໄມ້ໃຜ່</i> ບໍ່ແມ່ນ ..... 2<br>Yes <i>ໃຜ່</i> ແມ່ນ ..... 1 |
| [if yes:] <i>[ຖ້າໃຜ່:]</i> <i>[ຖ້າແມ່ນ:]</i>                                                                                                                                                                                                                                                                                                                                     | Description of condition: <i>ຄໍາອະທິບາຍອາການ</i>                |

OxTREC reference: 528-17

## ANTIBIOTICS AND ACTIVITY SPACES

1  
2  
3  
4  
5  
6  
7  
8  
9  
10  
11  
12  
13  
14  
15  
16  
17  
18  
19  
20  
21  
22  
23  
24  
25  
26  
27  
28  
29  
30  
31  
32  
33  
34  
35  
36  
37  
38  
39  
40  
41  
42  
43  
44  
45  
46  
47  
48  
49  
50  
51  
52  
53  
54  
55  
56  
57  
58  
59  
60

|                                                                                                                                                                |  |
|----------------------------------------------------------------------------------------------------------------------------------------------------------------|--|
| Can you please describe the symptoms or problem in your own words? กรุณาอธิบายอาการหรือปัญหาในแบบที่ท่านเข้าใจ ภาะลุนาอะหิบาย อากาานซุ๊บั้นซาในแตบที่ทานเฮ้าใจ |  |
|----------------------------------------------------------------------------------------------------------------------------------------------------------------|--|

For peer review only

|                                                                                                                                                                                                                                                                                                                                                                                                                                                                                                                                                                                                                                                                                                                                                                                                                                                                                                                                                                                                                                                                                                                                                                                                                                                                                                                                                                                                                                                                                                                                                                                                                                                                                                             |                                                                                                                                                                                                                                                                                                                                                                                                                                                                                     |
|-------------------------------------------------------------------------------------------------------------------------------------------------------------------------------------------------------------------------------------------------------------------------------------------------------------------------------------------------------------------------------------------------------------------------------------------------------------------------------------------------------------------------------------------------------------------------------------------------------------------------------------------------------------------------------------------------------------------------------------------------------------------------------------------------------------------------------------------------------------------------------------------------------------------------------------------------------------------------------------------------------------------------------------------------------------------------------------------------------------------------------------------------------------------------------------------------------------------------------------------------------------------------------------------------------------------------------------------------------------------------------------------------------------------------------------------------------------------------------------------------------------------------------------------------------------------------------------------------------------------------------------------------------------------------------------------------------------|-------------------------------------------------------------------------------------------------------------------------------------------------------------------------------------------------------------------------------------------------------------------------------------------------------------------------------------------------------------------------------------------------------------------------------------------------------------------------------------|
| <p>Can you please describe the diagnosis of the illness if you received any and where you received it?</p> <p><i>[note: the diagnosis might be given by any medical provider including untrained and informal. Record all diagnoses if more than one.]</i> หากท่านได้รับการวินิจฉัยอาการ กรุณาอธิบายอาการวินิจฉัยนั้นและระบุแหล่งที่มา [หมายเหตุ: ผู้ให้สัมภาษณ์อาจได้รับการวินิจฉัยจากผู้ให้บริการทางสุขภาพลักษณะใดก็ได้ ซึ่งรวมถึงผู้ให้บริการที่ไม่รับการศึกษาค้นการแพทย์และผู้ให้บริการนอกระบบ กรอกข้อมูลการวินิจฉัยทั้งหมด หากผู้ให้สัมภาษณ์ได้รับการวินิจฉัยมากกว่า 1 ครั้ง] ถ้าหากท่านได้รับบริการวินิจฉัยเฉพาะ ระบุรายละเอียดการวินิจฉัยเฉพาะ</p> <p>เฉพาะที่อื่นและระบุแพทย์ผู้ให้ [หมายเหตุ: ผู้ให้สัมภาษณ์อาจได้รับการวินิจฉัยเฉพาะจากผู้ใช้บริการสุขภาพประชาชนได้] กรุณากรอกข้อมูลผู้ให้บริการสุขภาพที่ปรึกษาที่มีประสบการณ์ในการวินิจฉัยเฉพาะที่อื่นและระบุผู้ให้บริการสุขภาพประชาชนที่ปรึกษาที่มีประสบการณ์ในการวินิจฉัยเฉพาะที่อื่น</p> <p><i>[Response codes รหัสคำตอบ ลະຫັດຄຳຕອບ]</i></p> <p>Drug dispensary, other local store selling medicine<br/>         ร้านขายของชำหรือร้านค้าทั่วไปที่มีการจำหน่ายยา ..... 1<br/>         Traditional healer หมอชาวบ้าน ช่างยาบ้าน ..... 2<br/>         Pharmacist เภสัชกร ผู้ขายยา ..... 3<br/>         Private clinic คลินิกเอกชน คลินิกเอกชน ..... 4<br/>         Private hospital โรงพยาบาลเอกชน โรงพยาบาลเอกชน ..... 5<br/>         Primary care unit สถานีอนามัยของรัฐ สะพานมิตรภาพไทย-ลาว ..... 6<br/>         Public hospital โรงพยาบาลของรัฐ โรงพยาบาลของรัฐ ..... 7<br/>         Other providers or Internet? Specify: ผู้ให้บริการรูปแบบอื่นๆ หรืออินเทอร์เน็ต (โปรดระบุ) ผู้ให้บริการในรูปแบบอื่นๆ หรืออินเทอร์เน็ต (ระบุ) ..... 8</p> | <p>Diagnosis 1 การวินิจฉัยโรค 1 ภาควิเฉพาะเฉพาะ 1:</p> <hr/> <p>Medical provider 1 ผู้ให้บริการทางสุขภาพ 1 ผู้ให้บริการสุขภาพ 1:</p> <p>1 2 3 4 5 6 7 8</p> <p>Diagnosis 2 การวินิจฉัยโรค 2 ภาควิเฉพาะเฉพาะ 2:</p> <hr/> <p>Medical provider 2 ผู้ให้บริการทางสุขภาพ 2 ผู้ให้บริการสุขภาพ 2:</p> <p>1 2 3 4 5 6 7 8</p> <p>Diagnosis 3 การวินิจฉัยโรค 3 ภาควิเฉพาะเฉพาะ 3:</p> <hr/> <p>Medical provider 3 ผู้ให้บริการทางสุขภาพ 3 ผู้ให้บริการสุขภาพ 3:</p> <p>1 2 3 4 5 6 7 8</p> |
| <p>When did you experience the accident/discomfort (for the first time) ท่านเริ่มมีอาการป่วยหรือประสบอุบัติเหตุตั้งแต่เมื่อใด ท่านเริ่มมีอาการเจ็บป่วยหรืออุบัติเหตุเกิดขึ้นเมื่อใด?</p>                                                                                                                                                                                                                                                                                                                                                                                                                                                                                                                                                                                                                                                                                                                                                                                                                                                                                                                                                                                                                                                                                                                                                                                                                                                                                                                                                                                                                                                                                                                    | <p>Onset: ___ days / ___ weeks / ___ months ago<br/>         เริ่มมีอาการป่วย/อุบัติเหตุ: ___ วัน / ___ สัปดาห์ / ___ เดือนที่แล้ว<br/>         เริ่มมีอาการเจ็บป่วยหรืออุบัติเหตุเกิดขึ้นเมื่อ: ___ ปี / ___ อาทิตย์ / ___ เดือนก่อน</p>                                                                                                                                                                                                                                           |
| <p>Would you describe the illness/accident as “mild,” “moderate,” or “severe”? ท่านคิดว่าอาการป่วยหรืออุบัติเหตุครั้งนั้นอยู่ในขั้นน้อย ปานกลาง หรือหนัก ท่านคิดว่าอาการเจ็บป่วยหรืออุบัติเหตุครั้งนั้นอยู่ในขั้นน้อย, ปานกลาง, หรือหนัก</p>                                                                                                                                                                                                                                                                                                                                                                                                                                                                                                                                                                                                                                                                                                                                                                                                                                                                                                                                                                                                                                                                                                                                                                                                                                                                                                                                                                                                                                                                | <p>Mild น้อย น้อย.....1<br/>         Moderate ปานกลาง ปานกลาง .....2<br/>         Severe หนัก หนัก.....3</p>                                                                                                                                                                                                                                                                                                                                                                        |

- a. Did you feel comfortable talking about your health? ท่านรู้สึกสบายใจ (หรืออึดอัดใจ) ในการพูดคุยเรื่องสุขภาพหรือไม่ ท่านรู้สึกสบายใจ (หรืออึดอัดใจ) ในการถามคำถามเกี่ยวกับสุขภาพหรือไม่
- b. Do you think these questions are too hard? ท่านรู้สึกว่าคำถามเหล่านี้ยากเกินไปหรือไม่ ท่านรู้สึกว่าคำถามเหล่านี้ยากเกินไปหรือไม่
- c. How do you rank mild, moderate, and severe? What do those words mean to you? ท่านใช้อะไรเป็นเครื่องบ่งบอกว่าอาการป่วยของท่านน้อย ปานกลาง หรือหนัก, ในความคิดของท่าน น้อย ปานกลาง และหนัก หมายความว่าอย่างไร ท่านใช้คำอะไรเป็นเครื่องบ่งบอกว่าอาการเจ็บป่วยของท่าน น้อย ปานกลาง หรือหนัก, ในความคิดของท่าน น้อย ปานกลาง และหนัก หมายความว่าอย่างไร

9. The next set of questions still relates to the same illness. คำถามชุดต่อไปยังคงเกี่ยวกับอาการป่วยครั้งเดียวกับคำถามก่อนหน้า คำถามชุดต่อไปยังเกี่ยวข้องกับอาการเจ็บป่วยเช่นเดียวกับคำถามก่อนหน้า

Can you please explain the stages of the treatment? I will ask you step-by-step what you did, starting from the moment you first detected the condition. กรุณาอธิบายขั้นตอนการรักษาทุกขั้นตอนระหว่างการป่วยครั้งนี้ เราขอให้ท่านเล่าให้เราฟังทีละขั้นตอนตั้งแต่ท่านเริ่มรู้สึกมีอาการป่วย ภาชนะจะทยอยขึ้นขั้นตอนการป่วยทุกขั้นตอนจะชว่าวการเจ็บเป็นลั้ญนี้ เราใช้ให้ท่านเล่าให้เรารู้ถึงขั้นตอนที่แตกต่างตอนที่ท่านเริ่มมีอาการป่วย

[ask respondent what he or she did first, then code answer and continue. After each column, ask: "What did you do next?" Only one activity per step. If e.g. medical treatment and then home care, first step is medical treatment, second step is home care. Repeat until respondent was cured or today otherwise.] [ถามคำถามเกี่ยวกับขั้นตอนการรักษาขั้นแรกสุด จากนั้นกรอกรหัสคำตอบ แล้วจึงถามคำถามต่อไป หลังจากกรอกข้อมูลในแต่ละคอลัมน์ ให้ถาม "ท่านทำอะไรต่อไปหลังจากนั้น" กรอกข้อมูลของการรักษาแต่ละชนิดต่อหนึ่งขั้นตอนเท่านั้น ตัวอย่าง: "เข้าพบแพทย์แล้วรักษาอาการที่บ้าน" ให้กรอก ขั้นที่ 1 เข้าพบแพทย์ และขั้นที่ 2 รักษาอาการที่บ้าน บันทึกขั้นตอนทุกขั้นตอนเช่นนี้จนถึงขั้นที่หายจากอาการหรือจนถึงวันที่ทำการเก็บข้อมูล] [ถามคำถามเกี่ยวกับขั้นตอนการป่วยเป็นปอดอักเสบซ้ำอีก จากนั้นจะข้ดคำถามแล้วจึงถามคำถามตามคำถามต่อไป ช้ญจากข้ดมุนในแต่ละข้อ ให้ถาม "ท่านเร้ดที่ยังต้ไปช้ญจากนั้น" ข้ดมุนของการป่วยเป็นปอดอักเสบแต่จะข้ดต้ช้ญขั้นตอนที่นั้น ตัวอย่าง: "เข้าพบแพทย์แล้วเป็นปอดอักเสบเรื้อรณ" ให้ข้ดมุนขั้นที่ 1 เข้าพบแพทย์ และขั้นที่ 2 ปอดอักเสบเรื้อรณ บันทึกขั้นตอนการป่วยเป็นปอดอักเสบแบบเรื้อรณข้ดต้ช้ญข้ดต้ช้ญจากรายการข้ดต้ช้ญ

|                                                                                                                                                                                                                                                              | Step 1 (detection)<br>ขั้นที่ 1 (เมื่อเริ่มรู้สึกป่วย)<br>ขั้นที่ 1 (เมื่อเริ่มบ่นป่วย)                                                                                                                                                                                                                                                                                                                                                                                                                                                                                                                                                                                                                                                                                                                                                                                                                                                                                                                                                                                                                                                                     | Step 2<br>ขั้นที่ 2<br>ขั้นที่ 2          | [continue until Step x when discomfort was cured or until today] [บันทึกขั้นตอนทุกขั้นตอนในตารางนี้ ตั้งแต่เริ่มป่วยจนถึงขั้นที่หายจากอาการหรือจนถึงวันที่ทำการเก็บข้อมูล] [บันทึกขั้นตอนการป่วยเป็นปอดอักเสบเรื้อรณข้ดต้ช้ญข้ดต้ช้ญจากรายการข้ดต้ช้ญ] |
|--------------------------------------------------------------------------------------------------------------------------------------------------------------------------------------------------------------------------------------------------------------|-------------------------------------------------------------------------------------------------------------------------------------------------------------------------------------------------------------------------------------------------------------------------------------------------------------------------------------------------------------------------------------------------------------------------------------------------------------------------------------------------------------------------------------------------------------------------------------------------------------------------------------------------------------------------------------------------------------------------------------------------------------------------------------------------------------------------------------------------------------------------------------------------------------------------------------------------------------------------------------------------------------------------------------------------------------------------------------------------------------------------------------------------------------|-------------------------------------------|--------------------------------------------------------------------------------------------------------------------------------------------------------------------------------------------------------------------------------------------------------|
| a) What kind of help or treatment did you get at this stage? ท่านมีการรักษาในขั้นตอนนี้อย่างไร ท่านมีการป่วยเป็นปอดอักเสบแบบใด<br><br>[if unsure, specify] [หากไม่แน่ใจ ให้กรอกรายละเอียดในหมวด "อื่นๆ"] [ระบุข้อบ่งชี้ที่ใช้ข้ดมุนรายละเอียดในหมวด "อื่นๆ"] | Ignored /did nothing ละเลย/ไม่ทำอะไร บ่นสใจ/บ่นเร้ดที่ยังเลย. 1<br>Self-care (sleep, rest, medicine at home) รักษาตัวเอง (นอนหลับ, พักผ่อน, ใ้ยาที่มีที่บ้าน) ปวดคินเอง (นอน, ฝักผ่อน, ใ้ยาที่มีอยู่เรื้อรณ) ..... 2<br>Care from family and friends (full-time) ใ้ได้รับการรักษาจากครอบครัวหรือเพื่อน (ตลอดเวลา) ใ้ได้รับการป่วยเป็นปอดอักเสบจากครอบครัว..... 3<br>Treated/consulted at a pharmacist ใ้รับการรักษา/ใ้ปรึกษาจากเภสัชกร ใ้การป่วยเป็นปอดอักเสบจากเภสัชกร..... 4<br>Treated/consulted at shop selling drugs ใ้รับการรักษา/ใ้ปรึกษาจากร้านขายของชำหรือร้านค้าทั่วไปที่มีกรจำหน่าย ใ้การป่วยเป็นปอดอักเสบจากร้านที่อไปที่มีกรจำหน่าย ..... 5<br>Treated/consulted at priv. clinic/hospital ใ้รับการรักษา/ใ้ปรึกษาจากคลินิก/โรงพยาบาลเอกชน ใ้การป่วยเป็นปอดอักเสบจากรากคลินิก/โรงพยาบาลเอกชน ..... 6<br>Treated/consulted at primary care unit ใ้รับการรักษา/ใ้ปรึกษาจากสถานอณนัฒของรัฐ ใ้การป่วยเป็นปอดอักเสบจากรากสถานอณนัฒของรัฐ ..... 7<br>Treated/consulted at a gvt. Hospital ใ้รับการรักษา/ใ้ปรึกษาจากโรงพยาบาลของรัฐ ใ้การป่วยเป็นปอดอักเสบจากรากโรงพยาบาลของรัฐ ..... 8<br>Other (specify) อื่นๆ (โปรดระบุ) อื่นๆ (ภาชนะบอกร) _ ..... 9 | 1<br>2<br>3<br>4<br>5<br>6<br>7<br>8<br>9 | 1<br>2<br>3<br>4<br>5<br>6<br>7<br>8<br>9                                                                                                                                                                                                              |



|                                                                                                                                                                                                                                                                                                                                                                                                                                                                                                                                                                                                                                                                                                                                                                                                                                                                                                                                                                                                                                                                                                                                                                                     |                                                                                                                                                                                                                                                                                                                                                                                                                                                                                                                                                                                                                                                                                                                 |                                                                         |                                                                                             |
|-------------------------------------------------------------------------------------------------------------------------------------------------------------------------------------------------------------------------------------------------------------------------------------------------------------------------------------------------------------------------------------------------------------------------------------------------------------------------------------------------------------------------------------------------------------------------------------------------------------------------------------------------------------------------------------------------------------------------------------------------------------------------------------------------------------------------------------------------------------------------------------------------------------------------------------------------------------------------------------------------------------------------------------------------------------------------------------------------------------------------------------------------------------------------------------|-----------------------------------------------------------------------------------------------------------------------------------------------------------------------------------------------------------------------------------------------------------------------------------------------------------------------------------------------------------------------------------------------------------------------------------------------------------------------------------------------------------------------------------------------------------------------------------------------------------------------------------------------------------------------------------------------------------------|-------------------------------------------------------------------------|---------------------------------------------------------------------------------------------|
| <p>b) Where did this activity take place? <b>At home</b> ที่บ้าน อยู่เรือน..... 1</p> <p>ขั้นตอนการรักษานี้เกิดขึ้นที่ไหน <b>Less than 10 min. from home</b> น้อยกว่า 10 นาทีจากบ้าน น้อยกว่า 10 นาทีจากเรือน..... 2</p> <p>เกิดขึ้นอยู่ใกล้ <b>10 to 29 min.</b> 10 ถึง 29 นาทีจากบ้าน 10 นาที 29 นาทีจากเรือน..... 3</p> <p><b>30 to 59 min.</b> 30 ถึง 59 นาทีจากบ้าน 30 นาที 59 นาทีจากเรือน..... 4</p> <p><b>60 to 119 min.</b> 60 ถึง 119 นาทีจากบ้าน 60 นาที 119 นาทีจากเรือน..... 5</p> <p><b>2 hours or more from home</b> 2 ชั่วโมงหรือมากกว่านั้น สอง ชั่วโมงหรือมากกว่า..... 6</p>                                                                                                                                                                                                                                                                                                                                                                                                                                                                                                                                                                                      | <p>At home ที่บ้าน อยู่เรือน..... 1</p> <p>Walk เดินเท้า ง่าย..... 2</p> <p>Own bicycle จักรยานของท่าน ลีดพับของของท่าน..... 3</p> <p>Own motorcycle / Three-wheeler รถจักรยานยนต์/รถสามล้อของท่าน ลีดจัก/ลีดสามล้อของท่าน..... 4</p> <p>Own car / four-wheeler รถยนต์/ขับเคลื่อนสี่ล้อของท่าน ลีดยีน/ลีดไฮยี่สี่ล้อของท่าน..... 5</p> <p>Taxi or other hired ride รถแท็กซี่/รถรับจ้าง ลีดแท็กซี่/ลีดรับจ้าง..... 6</p> <p>Public transport ขนส่งสาธารณะ ลีดขี้นสิ่งสาธารณะ..... 7</p> <p>Other (specify) อื่นๆ (โปรดระบุ) อื่นๆ (ระบุลงบอกร) _..... 8</p>                                                                                                                                                      | <p>1</p> <p>2</p> <p>3</p> <p>4</p> <p>5</p> <p>6</p>                   | <p>1</p> <p>2</p> <p>3</p> <p>4</p> <p>5</p> <p>6</p>                                       |
| <p>c) How did you get to the place of the activity? <b>At home</b> ที่บ้าน อยู่เรือน..... 1</p> <p>ท่านเดินทางไปที่สถานที่ที่ท่านทำการรักษาใน <b>Walk</b> เดินเท้า ง่าย..... 2</p> <p>ขั้นตอนนี้อย่างไร ท่านเดินทางไปที่ไหน <b>Own bicycle</b> จักรยานของท่าน ลีดพับของของท่าน..... 3</p> <p>ปีนปัดในชั้นตอนนี้เสมอใด <b>Own motorcycle / Three-wheeler</b> รถจักรยานยนต์/รถสามล้อของท่าน ลีดจัก/ลีดสามล้อของท่าน..... 4</p> <p><b>[select "at home" according to prior responses</b> เลือก "ที่บ้าน" ให้สอดคล้องกับคำตอบก่อนหน้าหากเข้าข่ายกรณีนั้น] <b>เลือก "อยู่เรือน" ให้สอดคล้องกับคำตอบก่อนหน้าหากกรวดข้ออื่น]</b> <b>Own car / four-wheeler</b> รถยนต์/ขับเคลื่อนสี่ล้อของท่าน ลีดยีน/ลีดไฮยี่สี่ล้อของท่าน..... 5</p> <p><b>เลือก "อยู่เรือน" ให้สอดคล้องกับคำตอบก่อนหน้าหากกรวดข้ออื่น]</b> <b>Taxi or other hired ride</b> รถแท็กซี่/รถรับจ้าง ลีดแท็กซี่/ลีดรับจ้าง..... 6</p> <p><b>เลือก "อยู่เรือน" ให้สอดคล้องกับคำตอบก่อนหน้าหากกรวดข้ออื่น]</b> <b>Public transport</b> ขนส่งสาธารณะ ลีดขี้นสิ่งสาธารณะ..... 7</p> <p><b>เลือก "อยู่เรือน" ให้สอดคล้องกับคำตอบก่อนหน้าหากกรวดข้ออื่น]</b> <b>Other (specify)</b> อื่นๆ (โปรดระบุ) อื่นๆ (ระบุลงบอกร) _..... 8</p> | <p>At home ที่บ้าน อยู่เรือน..... 1</p> <p>Walk เดินเท้า ง่าย..... 2</p> <p>Own bicycle จักรยานของท่าน ลีดพับของของท่าน..... 3</p> <p>Own motorcycle / Three-wheeler รถจักรยานยนต์/รถสามล้อของท่าน ลีดจัก/ลีดสามล้อของท่าน..... 4</p> <p>Own car / four-wheeler รถยนต์/ขับเคลื่อนสี่ล้อของท่าน ลีดยีน/ลีดไฮยี่สี่ล้อของท่าน..... 5</p> <p>Taxi or other hired ride รถแท็กซี่/รถรับจ้าง ลีดแท็กซี่/ลีดรับจ้าง..... 6</p> <p>Public transport ขนส่งสาธารณะ ลีดขี้นสิ่งสาธารณะ..... 7</p> <p>Other (specify) อื่นๆ (โปรดระบุ) อื่นๆ (ระบุลงบอกร) _..... 8</p>                                                                                                                                                      | <p>1</p> <p>2</p> <p>3</p> <p>4</p> <p>5</p> <p>6</p> <p>7</p> <p>8</p> | <p>1</p> <p>2</p> <p>3</p> <p>4</p> <p>5</p> <p>6</p> <p>7</p> <p>8</p>                     |
| <p>d) How long did this stage last? <b>At home</b> ที่บ้าน อยู่เรือน..... 1</p> <p>ในขั้นตอนนี้เป็นระยะเวลาเท่าใด ท่านปีนปัดในชั้นตอนนี้เป็นระยะเวลาเท่าใด <b>Duration</b> ระยะเวลา ไลยะเวลา:..... 2</p> <p><b>[let respondent choose category; if less than one day, code "1" day]</b> [ให้ผู้ให้สัมภาษณ์เลือกหน่วยเวลาเอง หากน้อยกว่าหนึ่งวันให้กรอก "1" วัน] <b>_____ days</b> วัน มี..... 3</p> <p><b>[ให้ผู้ใช้สามารถเลือกหน่วยเวลาเอง หากน้อยกว่าหนึ่งวันให้กรอก "1" วัน]</b> <b>_____ weeks</b> สัปดาห์ อาทิตย์..... 4</p> <p><b>[ให้ผู้ใช้สามารถเลือกหน่วยเวลาเอง หากน้อยกว่าหนึ่งวันให้กรอก "1" วัน]</b> <b>_____ months</b> เดือน เดือน..... 5</p>                                                                                                                                                                                                                                                                                                                                                                                                                                                                                                                        | <p>Duration ระยะเวลา ไลยะเวลา:..... 2</p> <p>_____ days วัน มี..... 3</p> <p>_____ weeks สัปดาห์ อาทิตย์..... 4</p> <p>_____ months เดือน เดือน..... 5</p>                                                                                                                                                                                                                                                                                                                                                                                                                                                                                                                                                      | <p>_____ days</p> <p>_____ weeks</p> <p>_____ months</p>                | <p>_____ days วัน มี</p> <p>_____ weeks สัปดาห์ อาทิตย์</p> <p>_____ months เดือน เดือน</p> |
| <p>e) Why did you seek this advice/treatment? <b>This is the normal choice</b> เป็นสิ่งที่ทำอยู่ปกติ เป็นแนวปะติบัค..... 1</p> <p>เพราะเหตุใดท่านจึงเลือกรักษา/รับคำแนะนำนี้ <b>Advice from others</b> เป็นคำแนะนำจากคนอื่น เป็นคำแนะนำจากถิ่นอื่น..... 2</p> <p>รับคำแนะนำนี้ <b>Too busy for alternatives</b> ไม่มีตัวเลือกอื่นเพราะไม่ว่าง ไม่มีทางเลือกอื่น..... 3</p> <p><b>[Mark all that apply]</b> [ตอบได้มากกว่า 1 ตัวเลือก] <b>Other (specify)</b> อื่นๆ (โปรดระบุ) อื่นๆ (ระบุลงบอกร) _..... 8</p> <p><b>[ตอบได้มากกว่า 1 ตัวเลือก]</b> <b>No access to money/transportation</b> ไม่มีเงินหรือการคมนาคม มีขี้นขากกรวดกับเงินหรือการคมนาคม..... 4</p> <p><b>Ran out of medicines</b> ยาที่ใช้หมด ยาที่ใช้ขี้น..... 5</p> <p><b>Not feeling better</b> พยายามรักษาด้วยวิธีอื่นแล้วไม่หาย ปีนปัดโดยวิธีอื่นแล้วขี้น..... 6</p> <p><b>New/more serious symptoms</b> อาการหนักลงกว่าเท่าหรือมีอาการอื่นปรากฏ อาการหนักลงกว่าเท่าหรือมีอาการอื่นปรากฏ..... 7</p>                                                                                                                                                                                                               | <p>This is the normal choice เป็นสิ่งที่ทำอยู่ปกติ เป็นแนวปะติบัค..... 1</p> <p>Advice from others เป็นคำแนะนำจากคนอื่น เป็นคำแนะนำจากถิ่นอื่น..... 2</p> <p>Too busy for alternatives ไม่มีตัวเลือกอื่นเพราะไม่ว่าง ไม่มีทางเลือกอื่น..... 3</p> <p>No access to money/transportation ไม่มีเงินหรือการคมนาคม มีขี้นขากกรวดกับเงินหรือการคมนาคม..... 4</p> <p>Ran out of medicines ยาที่ใช้หมด ยาที่ใช้ขี้น..... 5</p> <p>Not feeling better พยายามรักษาด้วยวิธีอื่นแล้วไม่หาย ปีนปัดโดยวิธีอื่นแล้วขี้น..... 6</p> <p>New/more serious symptoms อาการหนักลงกว่าเท่าหรือมีอาการอื่นปรากฏ อาการหนักลงกว่าเท่าหรือมีอาการอื่นปรากฏ..... 7</p> <p>Other (specify) อื่นๆ (โปรดระบุ) อื่นๆ (ระบุลงบอกร) _..... 8</p> | <p>1</p> <p>2</p> <p>3</p> <p>4</p> <p>5</p> <p>6</p> <p>7</p> <p>8</p> | <p>1</p> <p>2</p> <p>3</p> <p>4</p> <p>5</p> <p>6</p> <p>7</p> <p>8</p>                     |

|                                                                                                                                                                                                                                                                                                                                                                                                                                                                                                                                                                                                                                                                                                                                                                                                                                                                                                                                                                                                                                                           |                                                                                                                                                                                                                                                                                                                         |                                                                                                                                                                      |                                                                                                                                                    |
|-----------------------------------------------------------------------------------------------------------------------------------------------------------------------------------------------------------------------------------------------------------------------------------------------------------------------------------------------------------------------------------------------------------------------------------------------------------------------------------------------------------------------------------------------------------------------------------------------------------------------------------------------------------------------------------------------------------------------------------------------------------------------------------------------------------------------------------------------------------------------------------------------------------------------------------------------------------------------------------------------------------------------------------------------------------|-------------------------------------------------------------------------------------------------------------------------------------------------------------------------------------------------------------------------------------------------------------------------------------------------------------------------|----------------------------------------------------------------------------------------------------------------------------------------------------------------------|----------------------------------------------------------------------------------------------------------------------------------------------------|
| <p>f) Can you please name or describe all the medicines that you received or were prescribed during this step? กรุณา<br/>ระบุชื่อหรืออธิบายลักษณะของยาทั้งหมดที่ท่านได้รับจากการ<br/>รักษาขั้นตอนนี้ ภาชนะยาหรือยาที่ซื้อเองที่รับประทาน<br/>เองยาที่ท่านได้รับจากสถานพยาบาลอื่น</p> <p><i>[leave blank if no medicine received]</i><br/><i>[include medicine stored at home if "self-care at home"]</i> <i>[continue for all medicines received, then complete Questions g to k for each medicine individually]</i> <i>[เว้นช่องว่างหากผู้ให้สัมภาษณ์ไม่ได้รับยา<br/>จากการรักษาในขั้นตอนนี้] [รวมถึงยาที่มีเก็บไว้ที่บ้านด้วยหาก<br/>ผู้ให้สัมภาษณ์รักษาตัวเองอยู่ที่บ้าน] [บันทึกยาทุกชนิดที่ผู้ให้<br/>สัมภาษณ์ได้รับ จากนั้นกรอกข้อมูลในคำถาม g ถึง k สำหรับยา<br/>แต่ละชนิด] [จึงขอร้องว่าผู้ให้สัมภาษณ์ไม่ควรได้รับ<br/>ยาจากสถานพยาบาลอื่นในขั้นตอนนี้] [รวมยาที่มี<br/>เก็บอยู่เรือนด้วย ถ้าหากผู้ให้สัมภาษณ์กินเอง<br/>อยู่เรือน] [บันทึกยาทุกชนิดที่ผู้ให้สัมภาษณ์ได้<br/>รับ จากนั้นเติมข้อมูลในคำถาม g ถึง k สำหรับ<br/>ยาแต่ละชนิด]</i></p> | <p>Medicine 1 ยานชนิดที่ 1 ยาชนิดที่ 1:<br/>Name/description ชื่อ/คำอธิบาย ชื่อ/คำอธิบาย:<br/>_____</p> <p>Medicine 2 ยานชนิดที่ 2 ยาชนิดที่ 2:<br/>Name/description ชื่อ/คำอธิบาย ชื่อ/คำอธิบาย:<br/>_____</p> <p>Medicine 3 ยานชนิดที่ 3 ยาชนิดที่ 3:<br/>Name/description ชื่อ/คำอธิบาย ชื่อ/คำอธิบาย:<br/>_____</p> | <p>Medicine<br/>1<br/>ยานชนิดที่ 1<br/>ยาชนิดที่ 1<br/>Medicine<br/>2<br/>ยานชนิดที่ 2<br/>ยาชนิดที่ 2<br/>2<br/>Medicine<br/>3<br/>ยานชนิดที่ 3<br/>ยาชนิดที่ 3</p> | <p>Medicine 1<br/>ยานชนิดที่ 1<br/>ยาชนิดที่ 1<br/>Medicine 2<br/>ยานชนิดที่ 2<br/>ยาชนิดที่ 2<br/>Medicine 3<br/>ยานชนิดที่ 3<br/>ยาชนิดที่ 3</p> |
| <p><i>[for each medicine individually]</i> <i>[สำหรับยา<br/>แต่ละชนิด]</i> <i>[สำหรับยาแต่ละชนิด]</i></p> <p>g) For how long did you take the medicine? ท่านใช้ยานชนิดนี้อยู่นานเท่าใด ท่านใช้ยา<br/>ชนิดนี้กี่วันกี่เดือน<br/><i>[let respondent choose category; if more than one repeated episode, indicate total duration]</i> <i>[ให้ผู้ให้สัมภาษณ์เลือก<br/>หน่วยเวลาของ หากมีการใช้ยาตัวเดียวกันหลายครั้ง ให้ผู้<br/>สัมภาษณ์รวมระยะเวลาทั้งหมด] [ให้ผู้ให้สัมภาษณ์เลือก<br/>หน่วยเวลาเอง ถ้ามีการใช้ยาชนิดเดียวกันทุกวัน<br/>ทุกยาเพื่อใช้ผู้ให้สัมภาษณ์รวมระยะเวลาทั้งหมด]</i></p>                                                                                                                                                                                                                                                                                                                                                                                                                                                               | <p>Duration ระยะเวลา ระยะเวลา:<br/>____ days วัน _____<br/>____ weeks สัปดาห์ อาทิตย์<br/>____ months เดือน เดือน</p>                                                                                                                                                                                                   | <p>____ days<br/>วัน _____<br/>____ weeks<br/>สัปดาห์ อาทิตย์<br/>____ months<br/>เดือน เดือน</p>                                                                    | <p>____ days วัน _____<br/>____ weeks สัปดาห์ อาทิตย์<br/>____ months เดือน เดือน</p>                                                              |
| <p>h) How often per day did you take the medicine? ท่านใช้ยานชนิดนี้วันละกี่ครั้ง ท่านใช้<br/>ยานชนิดนี้มีจะกี่ครั้ง<br/><i>[calculate into daily use according to respondent's chosen frequency]</i><br/><i>[คำนวณเป็นจำนวนครั้งต่อวันจากคำตอบของผู้ให้สัมภาษณ์]</i><br/><i>[โปรดใส่เป็นจำนวนเพื่อที่ผู้ให้สัมภาษณ์สามารถ<br/>คำนวณ]</i></p>                                                                                                                                                                                                                                                                                                                                                                                                                                                                                                                                                                                                                                                                                                             | <p>Frequency ความถี่ ความถี่: ____ times daily ครั้งต่อวัน เข็ือต่อวัน</p>                                                                                                                                                                                                                                              | <p>____ times<br/>daily<br/>ครั้งต่อวัน<br/>เข็ือต่อวัน</p>                                                                                                          | <p>____ times daily<br/>ครั้งต่อวัน เข็ือต่อวัน</p>                                                                                                |



|                                                                                                                                                                                                                                                                                                                                                                                                                                         |                                                                                                                                                                                                                                                                                                                     |                                                                                                                                                                                                                 |                                                                                   |
|-----------------------------------------------------------------------------------------------------------------------------------------------------------------------------------------------------------------------------------------------------------------------------------------------------------------------------------------------------------------------------------------------------------------------------------------|---------------------------------------------------------------------------------------------------------------------------------------------------------------------------------------------------------------------------------------------------------------------------------------------------------------------|-----------------------------------------------------------------------------------------------------------------------------------------------------------------------------------------------------------------|-----------------------------------------------------------------------------------|
| <p>i) What dosage did you normally take? ท่านใช้ยาชนิดนี้ในปริมาณเท่าใดต่อหนึ่งครั้ง<br/>ท่านใช้ยาชนิดนี้มีปริมาณเท่าใดต่อหนึ่งครั้ง</p> <p><i>[let respondent choose category according to type of medicine] [ให้ผู้ใช้สัมภาษณ์เลือกหน่วยปริมาณของ โดยขึ้นอยู่กับชนิดของยา]</i></p> <p><i>[ให้ผู้ใช้สามารถเลือกหน่วยปริมาณยาเอง โดยขึ้นอยู่กับชนิดของยา]</i></p>                                                                       | <p>Dosage ปริมาณ ถวามถี่:</p> <p>___ tablets / capsules<br/>เม็ด/แคปซูล เม็ด/แคปซูล</p> <p>___ drops (for liquid medicine)<br/>หยด (สำหรับยาน้ำ) หยด (สำหรับยาน้ำ)</p> <p>___ spoons (for liquid medicine)<br/>ช้อน (สำหรับยาน้ำ) ช้อน (สำหรับยาน้ำ)</p> <p>per time administered ต่อครั้งที่ใช้ ต่อครั้งที่ใช้</p> | <p>___ tablets เม็ด<br/>เม็ด</p> <p>___ drops หยด หยด</p> <p>___ spoons ช้อน ช้อน</p>                                                                                                                           | <p>___ tablets เม็ด เม็ด</p> <p>___ drops หยด หยด</p> <p>___ spoons ช้อน ช้อน</p> |
| <p>j) Did you take the medicine exactly as it was recommended to you by the person who prescribed/sold them? ท่านใช้ยาชนิดนี้ตามคำแนะนำของผู้สั่งจ่าย/จำหน่ายหรือไม่<br/>ท่านใช้ยาชนิดนี้ตามคำแนะนำจากผู้สั่งจ่าย/จำหน่ายหรือไม่</p> <p><i>ท่านใช้ยาชนิดนี้ตามคำแนะนำของผู้สั่งจ่าย/จำหน่ายหรือไม่</i></p> <p>อย่าทืบ</p>                                                                                                               | <p>Yes ใช่ 1</p> <p>No ไม่ใช่ 2</p> <p>Did not receive advice ไม่ได้รับคำแนะนำ 9</p> <p>Don't know ไม่รู้ 99</p>                                                                                                                                                                                                    | <p>1</p> <p>2</p> <p>9</p> <p>99</p>                                                                                                                                                                            | <p>1</p> <p>2</p> <p>9</p> <p>99</p>                                              |
| <p>k) Did you finish the medicine? ท่านใช้ยาชนิดนี้จนหมดหรือไม่<br/>ท่านใช้ยาชนิดนี้จนหมดหรือไม่</p>                                                                                                                                                                                                                                                                                                                                    | <p>Yes ใช่ 1</p> <p>No ไม่ใช่ 2</p>                                                                                                                                                                                                                                                                                 | <p>1</p> <p>2</p>                                                                                                                                                                                               | <p>1</p> <p>2</p>                                                                 |
| <p>Have you now recovered from the illness/accident? ท่านฟื้นตัวจากการป่วย/อุบัติเหตุแล้วหรือไม่ ท่านดี<br/>จากอาการเจ็บป่วย/อุบัติเหตุแล้วหรือไม่</p>                                                                                                                                                                                                                                                                                  |                                                                                                                                                                                                                                                                                                                     | <p>Yes ใช่ 1</p> <p>No ไม่ใช่ 2</p>                                                                                                                                                                             | <p>1</p> <p>2</p>                                                                 |
| <p>Was anybody of your personal relationships involved in providing advice or help during the illness? ท่านได้รับคำปรึกษาหรือความช่วยเหลือในชั้นใด ๆ<br/>ก็ตามจากบุคคลที่เกี่ยวข้องกับการป่วยครั้งนี้หรือไม่ ท่านได้รับคำปรึกษาหรือความช่วยเหลือในชั้นใด ๆ</p> <p><i>[record up to ten names] [กรอกชื่อของบุคคลที่มีความเกี่ยวข้องระหว่างการป่วยไม่เกิน 10 คน] [ระบุชื่อของบุคคลที่มีความเกี่ยวข้องระหว่างการป่วยไม่เกิน 10 คน]</i></p> |                                                                                                                                                                                                                                                                                                                     |                                                                                                                                                                                                                 |                                                                                   |
| <p>a) What is the name of the person? ชื่อ</p>                                                                                                                                                                                                                                                                                                                                                                                          | <p>b) How is this person related to you? ความสัมพันธ์กับท่าน ถวามสัมพันธ์กับท่าน?</p> <p><i>[give examples if respondent is unsure about answer categories]</i></p> <p><i>[หากผู้ใช้สัมภาษณ์ไม่แน่ใจในหมวดคำตอบ ให้ยกตัวอย่างคำตอบได้] [ถ้าผู้ใช้สามารถระบุชื่อในหมวดคำตอบ ใช้ชื่อย่อหรือชื่อจริงก็ได้]</i></p>     | <p>c) What kind of support was provided? ท่านได้รับความช่วยเหลือจากบุคคลนี้อย่างไร ท่านได้รับการช่วยเหลือจากบุคคลนี้ในชั้นใด?</p> <p><i>[mark all that apply] [ตอบได้มากกว่า 1 คำเลือก] [ตอบได้หลายข้อ]</i></p> |                                                                                   |

|                                                                                                                                                                   |                                                                                                                                                                                                              |                |                                                                                                                                                                                                                                                                                                                                                                                                                                                                                                                                                                                                                                                                                                                                                                                                                                                                                                                                                                                                      |
|-------------------------------------------------------------------------------------------------------------------------------------------------------------------|--------------------------------------------------------------------------------------------------------------------------------------------------------------------------------------------------------------|----------------|------------------------------------------------------------------------------------------------------------------------------------------------------------------------------------------------------------------------------------------------------------------------------------------------------------------------------------------------------------------------------------------------------------------------------------------------------------------------------------------------------------------------------------------------------------------------------------------------------------------------------------------------------------------------------------------------------------------------------------------------------------------------------------------------------------------------------------------------------------------------------------------------------------------------------------------------------------------------------------------------------|
| 1<br>2<br>3<br>4<br>5<br>6<br>7<br>8<br>9<br>10<br>11<br>12<br>13<br>14<br>15<br>16<br>17<br>18<br>19<br>20<br>21<br>22<br>23<br>24<br>25<br>26<br>27<br>28<br>29 | Contact 1 คนที่ 1 ถิ่นที่ 1                                                                                                                                                                                  |                | Providing healthcare/attending ให้การรักษา/การดูแล<br>ใช้บริการเบี่ยงเบน..... 11<br>Providing advice ให้คำปรึกษา ใช้คำปรึกษา ..... 12<br>Providing medicine ให้ยา ใช้ยา ..... 13<br><br>Lending/granting money ให้หรือให้ยืมเงิน<br>ใช้ยืมยืมเงิน..... 21<br>Transportation/Lending vehicle อำนวยความสะดวกในด้านการ<br>เดินทาง/ให้ยืมพาหนะ สร้างความสะดวกด้านการเดินทาง/ใช้ยืม<br>ยานพาหนะ ..... 22<br>Contacting family/friends ติดต่อครอบครัว/เพื่อน ติดต่<br>อดปลิว/หมู..... 23<br>Providing food สนับสนุนอาหาร<br>สะทั้นบสะทั้นบอาหาร ..... 31<br>Helping with children/housework ช่วยดูแลลูกหลาน/งานบ้าน<br>ช่วยเบี่ยงเบนลูกหลานที่เด็กน้อย/วกรบ้าน ..... 32<br>Helping with jobs/agriculture work (feeding<br>animals/tending crops/covering shifts, etc.) ช่วยเหลือ<br>เกี่ยวกับอาชีพ/การเกษตร (ช่วยดูแลสัตว์เลี้ยง/งานเพาะปลูก/ทำงานแทน) ช่วย<br>รับผิดชอบ/งานกะสีกา (ช่วยเบี่ยงเบนสัดล้ง/เร็ดไรเร็ดณา/<br>เร็ดวกรแทน)..... 33<br>Other (specify) อื่นๆ (โปรดระบุ) อื่นๆ (ระลุมบอกร) _ .. 99 |
| 30<br>31                                                                                                                                                          | Contact 2 คนที่ 2 ถิ่นที่ 2                                                                                                                                                                                  | Name ชื่อ ชื่อ | 1 2 3 4 5 6 7 8 9<br>11 12 13 21 22 23 31 32 33 99                                                                                                                                                                                                                                                                                                                                                                                                                                                                                                                                                                                                                                                                                                                                                                                                                                                                                                                                                   |
| 32<br>33<br>34<br>35<br>36<br>37                                                                                                                                  | [continue until Contact x –<br>maximum 10 contacts] [บันทึกบุคคลที่มี<br>ความเกี่ยวข้องระหว่างอาการป่วยทุกคน ไม่เกิน 10 คน]<br>[บันทึกบุคคลที่มีอาการป่วยอยู่ตลอดเวลา<br>อาการเจ็บป่วยทุกชนิด ไม่เกิน 10 คน] | Name ชื่อ ชื่อ | 1 2 3 4 5 6 7 8 9<br>11 12 13 21 22 23 31 32 33 99                                                                                                                                                                                                                                                                                                                                                                                                                                                                                                                                                                                                                                                                                                                                                                                                                                                                                                                                                   |

- a. Do you think these questions are too hard? ท่านรู้สึกว่าการถามเหล่านี้ยากเกินไปหรือไม่ ท่านรู้สึกว่าการถามเหล่านี้ยากเกินไปหรือไม่
  - b. Did you find it tedious to go through the illness in such detail? เป็นเรื่องน่าเบื่อหรือไม่ที่ท่านต้องอธิบายอาการป่วยของท่านโดยละเอียด เป็นเรื่องน่าเบื่อหรือไม่ที่ท่านต้องอธิบายอาการป่วยของท่านโดยละเอียด
  - c. How well do you remember the medicines that you used during that illness? ท่านสามารถจดจำยาที่ท่านใช้ระหว่างอาการป่วยได้หรือไม่ ท่านสามารถจำยาที่ท่านใช้ระหว่างอาการป่วยได้หรือไม่
  - d. Did you think about anything in particular to help you recall the medicines? ที่ท่านนึกถึงอะไรเพื่อเป็นความช่วยเหลือในการทวนความจำเกี่ยวกับยาเหล่านี้ ท่านนึกถึงอะไรเพื่อเป็นความช่วยเหลือในการทวนความจำเกี่ยวกับยาเหล่านี้
  - e. How do you indicate that the symptoms are cured? Would you stop taking medicines then? What if the doctor's instruction is to complete the dose? ท่านสามารถบอกได้อย่างไรว่าการป่วยของท่านหายแล้ว หากอาการป่วยของท่านหายท่านจะหยุดรับประทานยาหรือไม่ หากแพทย์แนะนำให้ท่านใช้ยาจนหมดแต่อาการของท่านหายแล้วท่านจะปฏิบัติตามคำสั่งแพทย์หรือไม่ ท่านสามารถบอกได้หรือไม่ว่าอาการเจ็บป่วยของท่านดีแล้ว ถ้าอาการเจ็บป่วยของท่านดี ท่านจะหยุดกินยาทันทีหรือไม่ ถ้าเช่นนั้นแนะนำให้ท่านใช้ยาจนหมดแต่อาการของท่านดีแล้วท่านจะปฏิบัติตามคำสั่งแพทย์หรือไม่
10. The next question deals with medicine. Could you please tell me what is going through your mind while you are answering the question? คำถามต่อไปจะเป็นคำถามเกี่ยวกับยาโรค เราขอให้ท่านบอกเราว่าท่านนึกถึงอะไรระหว่างการตอบคำถามเหล่านี้ ถ้าท่านไม่แน่ใจว่าเป็นคำถามที่เกี่ยวกับยาโรค เราขอให้ท่านบอกเราว่าท่านนึกถึงอะไรระหว่างการตอบคำถามเหล่านี้

I would now like to ask you your opinion about medicine. There are no right or wrong answers, I only want to understand what you think. เราอยากทราบความคิดเห็นของท่านเกี่ยวกับการใช้ยา คำถามเหล่านี้ไม่มีคำตอบที่ถูกหรือผิด เราเพียงต้องการรู้ว่าท่านคิดอย่างไร เรายังคงอยากรู้ว่าท่านคิดอย่างไร เรายังคงอยากรู้ว่าท่านคิดอย่างไร เรายังคงอยากรู้ว่าท่านคิดอย่างไร

Consider the following medicines – they are commonly referred to as “antibiotics.”

พิจารณาหาว่ายาเหล่านี้ซึ่งเป็นที่รู้จักกันในนาม “ยาปฏิชีวนะ” มีผลอย่างไรบ้างเมื่อเทียบกับยาที่รู้จักกันในนาม “ยาต้านเชื้อ”

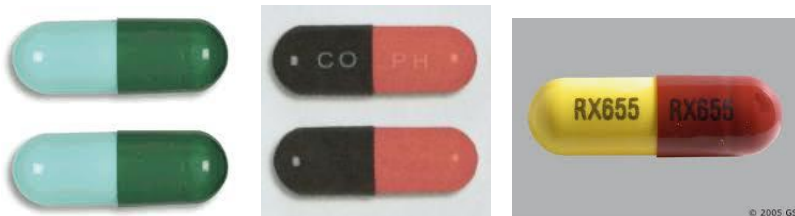

|                                                                                                                                                                                                                                                                                                                                                                                                                                             |                                                                                                                                                          |
|---------------------------------------------------------------------------------------------------------------------------------------------------------------------------------------------------------------------------------------------------------------------------------------------------------------------------------------------------------------------------------------------------------------------------------------------|----------------------------------------------------------------------------------------------------------------------------------------------------------|
| <p>Would you buy this medicine if you think you need it but cannot get it prescribed by a doctor? หากท่านไม่ได้รับยาหลังจากเข้าพบแพทย์แม้ท่านรู้ดีว่าท่านควรรับประทานยานี้ ท่านจะซื้อยานี้จากแหล่งอื่นหรือไม่ ถ้าท่านซื้อได้ รับประทานยาหลังจากเข้าพบแพทย์ท่านจะรู้สึกว่าการฉวยโอกาสแบบนี้ ท่านจะซื้อยาจากแหล่งอื่นหรือไม่</p>                                                                                                              | <p>Yes ใช่ ..... 1<br/>                 No ไม่ใช่ ..... 2<br/>                 I don't know ไม่ทราบ ..... 99</p>                                         |
| <p>Would you try other remedies such as sponge bath, herbs, or paracetamol before using this medicine? ท่านจะลองใช้วิธีการรักษาอื่น เช่น เช็ดตัว สมุนไพร หรือ พาราเซตามอลก่อนใช้ยานี้หรือไม่ ท่านจะพยายามเป็นปีโดยไม่ใช้วิธีการอื่น เช่น เช็ดตัว ยารักษาไม่ ชีวจิตบำบัดก่อนใช้ยานี้หรือไม่</p>                                                                                                                                              | <p>Yes ใช่ ..... 1<br/>                 No ไม่ใช่ ..... 2<br/>                 I don't know ไม่ทราบ ..... 99</p>                                         |
| <p>If you had to take this medicine and your symptoms disappear after 2 days, would you finish a complete course of 7 days or stop taking it immediately? หากท่านจำเป็นต้องรับประทานยานี้ และอาการของท่านดีขึ้นภายใน 2 วัน ท่านจะรับประทานยาต่อจนครบ 7 วัน หรือหยุดรับประทานทันที ถ้าหากท่านมีความจำเป็นที่จะต้องรับประทานยาเพื่อเป็นการป้องกัน และอาการของท่านดีขึ้นภายในสองวัน ท่านจะรับประทานยาต่อจนครบ 7 วัน หรือหยุดรับประทานทันที</p> | <p>Finish course รับประทานต่อจนหมด ..... 1<br/>                 Stop taking หยุดรับประทาน ..... 2<br/>                 I don't know ไม่ทราบ ..... 99</p> |
| <p>Do you think the way other people use this medicine affects its efficacy on you? ท่านคิดว่า การใช้ยาของคนอื่นมีผลกระทบต่อผลของการใช้ยาของท่านหรือไม่ ท่านคิดว่าท่านใช้ยาที่มีประสิทธิภาพอื่นที่มีลักษณะใกล้เคียงกัน</p>                                                                                                                                                                                                                  | <p>Yes ใช่ ..... 1<br/>                 No ไม่ใช่ ..... 2<br/>                 I don't know ไม่ทราบ ..... 99</p>                                         |

- As I have said before, these survey questions are not intended to measure your knowledge. Did you feel tested or pressured being asked these questions at all? เราได้บอกท่านข้างต้นเกี่ยวกับคำถามเหล่านี้ที่ไม่ได้ถูกออกแบบเพื่อเป็นข้อสอบวัดความรู้ ท่านรู้สึกถูกทดสอบหรือกดดันในการตอบคำถามเหล่านี้หรือไม่ เรายังคงอยากรู้ว่าท่านคิดอย่างไรเกี่ยวกับคำถามเหล่านี้ที่บ่งบอกถึงความรู้
- Have you heard of antibiotics? ท่านเคยได้ยินเกี่ยวกับยาปฏิชีวนะหรือไม่ ท่านเคยได้ยินเกี่ยวกับยาต้านเชื้อหรือไม่
- Other than the term “antibiotics,” how do you normally call these medicines? นอกจากคำว่า “ยาปฏิชีวนะ” ท่านเรียกยาชนิดนี้ว่าอะไรอีกบ้าง นอกจากคำว่า ยาต้านเชื้อ ท่านเรียกยาชนิดนี้ว่าอะไรอีกบ้าง
- Do you think other villagers will associate the pictures with other types of medicine? ท่านคิดว่าชาวบ้านคนอื่นๆ จะนึกถึงยาชนิดอื่นหรือไม่เมื่อเห็นภาพเหล่านี้ ท่านคิดว่าชาวบ้านคนอื่นๆ จะนึกถึงยาชนิดอื่นหรือไม่เมื่อเห็นภาพเหล่านี้

**Part V – Household-Related Survey Questions ส่วนที่ 5 – คำถามเกี่ยวกับครัวเรือน ส่วนที่ 5 - คำถามเกี่ยวกับครัวเรือน**

*Thank you. We now come to the last part. ขอบคุณครับ/ค่ะ ส่วนต่อไปเป็นส่วนสุดท้ายของการสัมภาษณ์ ขอบใจ ส่วนนี้เป็นส่วนสุดท้ายของงานสำผาด*

11. The following questions relate to your household. คำถามต่อไปนี้เป็นคำถามเกี่ยวกับครัวเรือนของท่าน คำถามต่อไปนี้จะเป็นคำถามเกี่ยวกับครัวเรือนของท่าน

| I will now ask you for some items in your household. Please tell me...<br>ต่อไปเราจะถามท่านเกี่ยวกับสิ่งของที่ท่านครอบครองในครัวเรือนต่อไปนี้เราจะถามท่านเกี่ยวกับสิ่งของ                           |                                                                                           | Number of items in household <i>นวนของสิ่งของที่มีภายในครัวเรือนจำนวนของสิ่งของที่มีภายในครัวเรือน:</i> |
|-----------------------------------------------------------------------------------------------------------------------------------------------------------------------------------------------------|-------------------------------------------------------------------------------------------|---------------------------------------------------------------------------------------------------------|
| Have you got a <i>functioning</i> radio in your household? If so, how many? <i>ท่านมีวิทยุที่ใช้งานได้ใช้งานในครัวเรือนของท่านหรือไม่ ถ้ามี ที่เครื่อง</i>                                          | ท่านมีวิทยุที่ใช้งานได้ใช้งานในครัวเรือนของท่านหรือไม่ ถ้ามี ที่เครื่อง                   | _____                                                                                                   |
| Have you got a <i>functioning</i> TV in your household? If so, how many? <i>ท่านมีโทรทัศน์ที่ใช้งานได้ใช้งานในครัวเรือนของท่านหรือไม่ ถ้ามี ที่เครื่อง</i>                                          | ท่านมีโทรทัศน์ที่ใช้งานได้ใช้งานในครัวเรือนของท่านหรือไม่ ถ้ามี ที่เครื่อง                | _____                                                                                                   |
| Have you got a <i>functioning</i> rice cooker in your household? If so, how many? <i>ท่านมีหม้อหุงข้าวที่ใช้งานได้ใช้งานในครัวเรือนของท่านหรือไม่ ถ้ามี ที่เครื่อง</i>                              | ท่านมีหม้อหุงข้าวที่ใช้งานได้ใช้งานในครัวเรือนของท่านหรือไม่ ถ้ามี ที่เครื่อง             | _____                                                                                                   |
| Have you got a <i>functioning</i> landline telephone in your household? If so, how many? <i>ท่านมีโทรศัพท์บ้านที่ใช้งานได้ใช้งานในครัวเรือนของท่านหรือไม่ ถ้ามี ที่เครื่อง</i>                      | ท่านมีโทรศัพท์บ้านที่ใช้งานได้ใช้งานในครัวเรือนของท่านหรือไม่ ถ้ามี ที่เครื่อง            | _____                                                                                                   |
| Have you got a <i>functioning</i> mobile phone in your household? If so, how many? <i>ท่านมีโทรศัพท์มือถือที่ใช้งานได้ใช้งานในครัวเรือนของท่านหรือไม่ ถ้ามี ที่เครื่อง</i>                          | ท่านมีโทรศัพท์มือถือที่ใช้งานได้ใช้งานในครัวเรือนของท่านหรือไม่ ถ้ามี ที่เครื่อง          | _____                                                                                                   |
| Have you got a <i>functioning</i> computer in your household? If so, how many? <i>ท่านมีคอมพิวเตอร์ที่ใช้งานได้ใช้งานในครัวเรือนของท่านหรือไม่ ถ้ามี ที่เครื่อง</i>                                 | ท่านมีคอมพิวเตอร์ที่ใช้งานได้ใช้งานในครัวเรือนของท่านหรือไม่ ถ้ามี ที่เครื่อง             | _____                                                                                                   |
| Have you got a <i>functioning</i> bicycle in your household? If so, how many? <i>ท่านมีรถจักรยานที่ใช้งานได้ใช้งานในครัวเรือนของท่านหรือไม่ ถ้ามี ที่คัน</i>                                        | ท่านมีรถจักรยานที่ใช้งานได้ใช้งานในครัวเรือนของท่านหรือไม่ ถ้ามี ที่คัน                   | _____                                                                                                   |
| Have you got a <i>functioning</i> scooter, motorcycle, or tricycle in your household? If so, how many? <i>ท่านมีจักรยานยนต์หรือรถสามล้อที่ใช้งานได้ใช้งานในครัวเรือนของท่านหรือไม่ ถ้ามี ที่คัน</i> | ท่านมีจักรยานยนต์หรือรถสามล้อที่ใช้งานได้ใช้งานในครัวเรือนของท่านหรือไม่ ถ้ามี ที่คัน     | _____                                                                                                   |
| Have you got a <i>functioning</i> car or truck in your household? If so, how many? <i>ท่านมีรถยนต์ รถกระบะ หรือรถบรรทุกที่ใช้งานได้ใช้งานในครัวเรือนของท่านหรือไม่ ถ้ามี ที่คัน</i>                 | ท่านมีรถยนต์ รถกระบะ หรือรถบรรทุกที่ใช้งานได้ใช้งานในครัวเรือนของท่านหรือไม่ ถ้ามี ที่คัน | _____                                                                                                   |
| Have you got a <i>functioning</i> tractor in your household? If so, how many? <i>ท่านมีรถแทรกเตอร์หรือรถไถที่ใช้งานได้ใช้งานในครัวเรือนของท่านหรือไม่ ถ้ามี ที่คัน</i>                              | ท่านมีรถแทรกเตอร์หรือรถไถที่ใช้งานได้ใช้งานในครัวเรือนของท่านหรือไม่ ถ้ามี ที่คัน         | _____                                                                                                   |
| Have you got a <i>functioning</i> refrigerator or freezer in your household? If so, how many? <i>ท่านมีตู้เย็นหรือตู้แช่แข็งที่ใช้งานได้ใช้งานในครัวเรือนของท่านหรือไม่ ถ้ามี ที่ตู้</i>            | ท่านมีตู้เย็นหรือตู้แช่แข็งที่ใช้งานได้ใช้งานในครัวเรือนของท่านหรือไม่ ถ้ามี ที่ตู้       | _____                                                                                                   |

- Do you feel comfortable (or uncomfortable) recalling these points for your household?  
ท่านรู้สึกสบายใจ (หรืออึดอัดใจ) ในการนึกถึงหัวข้อของเครื่องใช้เหล่านี้ในครัวเรือนของท่านหรือไม่ ท่านรู้สึกสบายใจ (หรืออึดอัดใจ) ในงานนึกถึงเรื่องใช้เหล่านี้ในครัวเรือนของท่านหรือไม่
- Are there some common household items that you normally see in your village?  
ข้าวของเครื่องใช้ที่เรากล่าวมาข้างต้นเป็นสิ่งที่คนในหมู่บ้านนี้ใช้กันทั่วไปหรือไม่ เรื่องใช้เหล่านี้เรากล่าวมาในขั้นต้นเป็นสิ่งที่คนในหมู่บ้านนี้ใช้ทั่วไปหรือไม่
- How would you distinguish whether somebody in your village is wealthy or not?





| No                       | Topic                    | Item                                                                                                                                                                                                         | Check                               | Comment                                                                                                                                                           |
|--------------------------|--------------------------|--------------------------------------------------------------------------------------------------------------------------------------------------------------------------------------------------------------|-------------------------------------|-------------------------------------------------------------------------------------------------------------------------------------------------------------------|
| 1a                       | Title & Abstract         | (a) Indicate the study's design with a commonly used term in the title or the abstract                                                                                                                       | <input checked="" type="checkbox"/> | Page 1                                                                                                                                                            |
| 1b                       | Title & Abstract         | (b) Provide in the abstract an informative and balanced summary of what was done and what was found                                                                                                          | <input checked="" type="checkbox"/> | Pages 2-3                                                                                                                                                         |
| <b>Introduction</b>      |                          |                                                                                                                                                                                                              |                                     |                                                                                                                                                                   |
| 2                        | Background/rationale     | Explain the scientific background and rationale for the investigation being reported                                                                                                                         | <input checked="" type="checkbox"/> | See introduction, esp. page 4                                                                                                                                     |
| 3                        | Objectives               | State specific objectives, including any prespecified hypotheses                                                                                                                                             | <input checked="" type="checkbox"/> | See introduction, page 5                                                                                                                                          |
| <b>Methods</b>           |                          |                                                                                                                                                                                                              |                                     |                                                                                                                                                                   |
| 4                        | Study design             | Present key elements of study design early in the paper                                                                                                                                                      | <input checked="" type="checkbox"/> | Research design at beginning of methods section, page 6                                                                                                           |
| 5                        | Setting                  | Describe the setting, locations, and relevant dates, including periods of recruitment, exposure, follow-up, and data collection                                                                              | <input checked="" type="checkbox"/> | See research design section, pages 6-7; exposure and follow-up not applicable                                                                                     |
| 6                        | Participants             | Cross-sectional study—Give the eligibility criteria, and the sources and methods of selection of participants                                                                                                | <input checked="" type="checkbox"/> | See research design and study population sections, pages 6-7                                                                                                      |
| 7                        | Variables                | Clearly define all outcomes, exposures, predictors, potential confounders, and effect modifiers. Give diagnostic criteria, if applicable                                                                     | <input checked="" type="checkbox"/> | Key outcomes described in data collection section, pages 7-8; All variables described in Supplemental Material Table A2; diagnostic criteria not applicable       |
| 8                        | Data sources/measurement | For each variable of interest, give sources of data and details of methods of assessment (measurement). Describe comparability of assessment methods if there is more than one group                         | <input checked="" type="checkbox"/> | All variables described in Supplemental Material Table A2, data collection and translation process for the two sites described in data collection section, page 8 |
| 9                        | Bias                     | Describe any efforts to address potential sources of bias                                                                                                                                                    | <input checked="" type="checkbox"/> | Recall biases mitigated through elicitation of behavioural sequences (pages 17-18)                                                                                |
| 10                       | Study size               | Explain how the study size was arrived at                                                                                                                                                                    | <input checked="" type="checkbox"/> | See research design section, page 6                                                                                                                               |
| 11                       | Quantitative variables   | Explain how quantitative variables were handled in the analyses. If applicable, describe which groupings were chosen and why                                                                                 | <input checked="" type="checkbox"/> | All variables described in Appendix Table A2 (incl. variable construction)                                                                                        |
| 12a                      | Statistical methods      | (a) Describe all statistical methods, including those used to control for confounding                                                                                                                        | <input checked="" type="checkbox"/> | Data analysis section, page 9                                                                                                                                     |
| 12b                      | Statistical methods      | (b) Describe any methods used to examine subgroups and interactions                                                                                                                                          | <input checked="" type="checkbox"/> | Data analysis section, page 9                                                                                                                                     |
| 12c                      | Statistical methods      | (c) Explain how missing data were addressed                                                                                                                                                                  | <input checked="" type="checkbox"/> | Not applicable (data complete; sub-group analysis of illness episodes indicated in data analysis section, page 9)                                                 |
| 12d                      | Statistical methods      | Cross-sectional study—If applicable, describe analytical methods taking account of sampling strategy                                                                                                         | <input checked="" type="checkbox"/> | Page 9: SVY suite of commands in Stata 15                                                                                                                         |
| 12e                      | Statistical methods      | Describe any sensitivity analyses                                                                                                                                                                            | <input checked="" type="checkbox"/> | Inclusion of "confirmed" and "potential" antibiotic use, data collection section, page 8                                                                          |
| <b>Results</b>           |                          |                                                                                                                                                                                                              |                                     |                                                                                                                                                                   |
| 13a                      | Participants             | (a) Report numbers of individuals at each stage of study—eg numbers potentially eligible, examined for eligibility, confirmed eligible, included in the study, completing follow-up, and analysed            | <input checked="" type="checkbox"/> | See flow diagram of sampling strategy in Figure 1, page 6                                                                                                         |
| 13b                      | Participants             | (b) Give reasons for non-participation at each stage                                                                                                                                                         | <input checked="" type="checkbox"/> | Research design section: Non-availability of random selection, information on random replacement procedures in page 6 and selection data in Figure 1              |
| 13c                      | Participants             | (c) Consider use of a flow diagram                                                                                                                                                                           | <input checked="" type="checkbox"/> | See flow diagram of sampling strategy in Figure 1, page 6                                                                                                         |
| 14a                      | Descriptive data         | (a) Give characteristics of study participants (eg demographic, clinical, social) and information on exposures and potential confounders                                                                     | <input checked="" type="checkbox"/> | Appendix Table 1                                                                                                                                                  |
| 14b                      | Descriptive data         | (b) Indicate number of participants with missing data for each variable of interest                                                                                                                          | <input checked="" type="checkbox"/> | Not applicable (data complete)                                                                                                                                    |
| 15                       | Outcome data             | Cross-sectional study—Report numbers of outcome events or summary measures                                                                                                                                   | <input checked="" type="checkbox"/> | Appendix Table 1                                                                                                                                                  |
| 16a                      | Main results             | (a) Give unadjusted estimates and, if applicable, confounder-adjusted estimates and their precision (eg, 95% confidence interval). Make clear which confounders were adjusted for and why they were included | <input checked="" type="checkbox"/> | Table 2, pages 15-16                                                                                                                                              |
| 16b                      | Main results             | (b) Report category boundaries when continuous variables were categorized                                                                                                                                    | <input checked="" type="checkbox"/> | Not applicable                                                                                                                                                    |
| 16c                      | Main results             | (c) If relevant, consider translating estimates of relative risk into absolute risk for a meaningful time period                                                                                             | <input checked="" type="checkbox"/> | Not applicable                                                                                                                                                    |
| 17                       | Other analyses           | Report other analyses done—eg analyses of subgroups and interactions, and sensitivity analyses                                                                                                               | <input checked="" type="checkbox"/> | Throughout results section, pages 10-16                                                                                                                           |
| <b>Discussion</b>        |                          |                                                                                                                                                                                                              |                                     |                                                                                                                                                                   |
| 18                       | Key results              | Summarise key results with reference to study objectives                                                                                                                                                     | <input checked="" type="checkbox"/> | Discussion/conclusion section, pages 16-17                                                                                                                        |
| 19                       | Limitations              | Discuss limitations of the study, taking into account sources of potential bias or imprecision. Discuss both direction and magnitude of any potential bias                                                   | <input checked="" type="checkbox"/> | Discussion/conclusion section, pages 17-18                                                                                                                        |
| 20                       | Interpretation           | Give a cautious overall interpretation of results considering objectives, limitations, multiplicity of analyses, results from similar studies, and other relevant evidence                                   | <input checked="" type="checkbox"/> | Discussion/conclusion section, lines 18-19                                                                                                                        |
| 21                       | Generalisability         | Discuss the generalisability (external validity) of the study results                                                                                                                                        | <input checked="" type="checkbox"/> | Discussion/conclusion section, pages 17-18                                                                                                                        |
| <b>Other information</b> |                          |                                                                                                                                                                                                              |                                     |                                                                                                                                                                   |
| 22                       | Funding                  | Give the source of funding and the role of the funders for the present study and, if applicable, for the original study on which the present article is based                                                | <input checked="" type="checkbox"/> | See funding declaration, page 21                                                                                                                                  |
