# Supplementary material for: Antibiotic knowledge, attitudes and practices: new insights from cross-sectional rural health behaviour surveys in low-income and middle-income South-East Asia
Source: PubMed Central journal article supplement (PMC6707701; doi:10.1136/bmjopen-2018-028224), 2019-08-20
Supplement: bmjopen-2018-028224supp001.pdf [file bmjopen-2018-028224supp001.pdf]

## 1 Supplemental Material

### 2 Figure A1. Trend of AMR-related social sciences and multidisciplinary publications, 1970–2017.

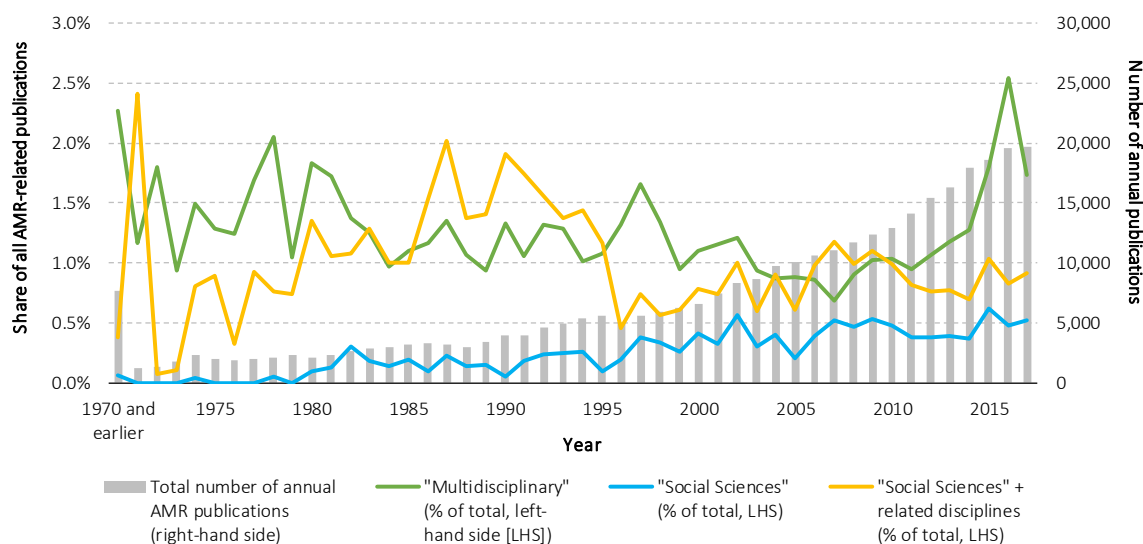

3

4 Source: Authors, based on Elsevier B.V. [15].

5 Notes: Data until 2018, as of 9 October 2018. Disciplines as reported by Scopus database, with "Social Sciences" + related disciplines" providing upper bound of social science publications including Arts and Humanities;" "Business, Management and Accounting;" "Decision Sciences;" "Economics, Econometrics and Finance;" and "Psychology" alongside "Social Sciences." Based on search query [TITLE-ABS-KEY ("antibiotic resistance" OR "drug resistance" OR "antimicrobial resistance" OR "AMR")]. Total number of publications as of 9 October 2018 was 347,511, of which 66.0% arose from "Medicine;" 28.3% from "Biochemistry, Genetics and Molecular Biology;" and 18.2% from "Immunology and Microbiology" (multiple categories per publication possible.) "Social Sciences" average during the period was 0.4% (0.9% for "Social Sciences" + related disciplines"). LHS=left-hand side.

11

12 Table A1. Variable descriptions.

|                                  | Variable                                    | Description                                                                                                                                                                                                                                                                                                                                                                                                                                                                                                                                                                     |
|----------------------------------|---------------------------------------------|---------------------------------------------------------------------------------------------------------------------------------------------------------------------------------------------------------------------------------------------------------------------------------------------------------------------------------------------------------------------------------------------------------------------------------------------------------------------------------------------------------------------------------------------------------------------------------|
| Demographic attributes           | Female                                      | Binary variable: Sex of respondent (R); [1] if female.                                                                                                                                                                                                                                                                                                                                                                                                                                                                                                                          |
|                                  | Age                                         | Continuous variable: Age in years.                                                                                                                                                                                                                                                                                                                                                                                                                                                                                                                                              |
|                                  | Education                                   | Continuous variable: Completed years of formal education.                                                                                                                                                                                                                                                                                                                                                                                                                                                                                                                       |
|                                  | Speaking Thai / Lao                         | Binary variable: [1] if R reported ability to communicate in main language (irrespective of reading and writing).                                                                                                                                                                                                                                                                                                                                                                                                                                                               |
|                                  | Wealth index                                | Continuous variable: Average of 17 household assets and amenities on scale from [0] to [1].                                                                                                                                                                                                                                                                                                                                                                                                                                                                                     |
|                                  | Buddhist religion                           | Binary variable: [1] if R belongs to the majority religion (Buddhism in both sites).                                                                                                                                                                                                                                                                                                                                                                                                                                                                                            |
|                                  | Thai/Lao nationality                        | Binary variable: [1] if R has Thai (Chiang Rai) or Lao (Salavan) nationality.                                                                                                                                                                                                                                                                                                                                                                                                                                                                                                   |
|                                  | Majority ethnic group                       | Binary variable: [1] if R belongs to the majority ethnic group Thai (Chiang Rai) or Lao Loum (Salavan).                                                                                                                                                                                                                                                                                                                                                                                                                                                                         |
| Antibiotic knowledge / attitudes | Aware of antibiotics                        | Binary variable: [1] if R recognised images of antibiotic capsules that are common in the field site and, if not, the most common translation of antibiotics as “anti-inflammatory drug” (“ยาแก้ปวด”) or “yah kae ak seb” in Thai and “germ resister” (“ຢາຕ້ານລູກຊີວິດ” or “yah dtan suea”) in Lao. Additional categorical variables (coded ex ante and ex post) recorded the names and purposes that the respondent reported following recognition of the medicine.                                                                                                            |
|                                  | Aware of drug resistance                    | Binary variable: [1] if R recognised the local terms for “drug resistance.” In Thai, “drug resistance” was translated as “ดื้อยา” (“due yah”). Lao has two translations of which “ດີ້ຍາ” (“due yah”) is the formal term and “ລູ່ງຍາ” (“lueng yah”) is a more colloquial but broader expression (both translations were asked separately). Additional categorical variables (coded ex ante and ex post) recorded the interpretations of each term.                                                                                                                               |
|                                  | Would not buy antibiotics over the counter  | Binary variable: [1] if answer to question “Is there any situation for which you would buy this medicine?” corresponded to FAO/OIE/WHO message “When using antibiotics: follow professional advice” (field coded based on survey training manual) [1].                                                                                                                                                                                                                                                                                                                          |
|                                  | Prefers alternatives over antibiotics       | Binary variable: [1] if answer to question “Do you prefer other remedies such as herbs or cough syrup to this medicine for sore throat?” corresponded to FAO/OIE/WHO message “Ensure medicines are only used when necessary” (field coded) [1].                                                                                                                                                                                                                                                                                                                                 |
|                                  | Does not keep antibiotics for future use    | Binary variable: [1] if answer to question “If you were prescribed this medicine by a doctor and did not finish the course, would you keep it for future use?” corresponded to FAO/OIE/WHO message “When using antibiotics: never share medicines or use leftover drugs to treat a different illness” (field coded) [1].                                                                                                                                                                                                                                                        |
|                                  | Knows that antibiotic resistance can spread | Binary variable: [1] if answer to question “Can your ‘due yah’ (drug resistance) spread to other people, for example if you sneeze on them?” corresponded to FAO/OIE/WHO message “antimicrobial resistance can affect us all” (field coded) [1].                                                                                                                                                                                                                                                                                                                                |
|                                  |                                             | Answer score                                                                                                                                                                                                                                                                                                                                                                                                                                                                                                                                                                    |
| Illness episodes                 | Self-rated severity                         | Ordinal variable: [1] if illness is reported as “mild;” [2] as “moderate;” [3] as “severe.”                                                                                                                                                                                                                                                                                                                                                                                                                                                                                     |
|                                  | Duration of illness episode                 | Continuous variable: Total duration of illness episode in days, calculated as sum of duration of individual steps in episode.                                                                                                                                                                                                                                                                                                                                                                                                                                                   |
| Treatment-seeking behaviour      | Public healthcare provider                  | Binary variable: [1] if R reported accessing health centre or hospital during illness episode.                                                                                                                                                                                                                                                                                                                                                                                                                                                                                  |
|                                  | Private healthcare provider                 | Binary variable: [1] if R reported accessing private clinic, hospital, or pharmacy.                                                                                                                                                                                                                                                                                                                                                                                                                                                                                             |
|                                  | Informal healthcare provider                | Binary variable: [1] if R reported accessing grocery store or traditional healer.                                                                                                                                                                                                                                                                                                                                                                                                                                                                                               |
|                                  | Care from family or self-care               | Binary variable: [1] if R reported self-treatment or care from family member or friend.                                                                                                                                                                                                                                                                                                                                                                                                                                                                                         |
|                                  | Other types of healthcare access            | Binary variable: [1] if R reported accessing other healthcare provider (e.g. village health volunteer).                                                                                                                                                                                                                                                                                                                                                                                                                                                                         |
|                                  | Medicines use episodes                      | Continuous variable: Number of reported medicine use episodes per illness, categorised into types of medicine (coded ex post into non-antibiotic medicine, antibiotics, and potential antibiotics) and sources of access (public, private, informal healthcare provider). Note that the actual amount of medicine used during each “medicine use episode” is likely to vary systematically across formal and informal healthcare providers, with “episodes” from the latter typically containing only a small number of pills and capsules for immediate treatment of symptoms. |

13 Source: Authors.

14 Table A2. Correlation matrixes of independent variables in regression models.

|                                             | Would not buy antibiotics over the counter | Prefers antibiotics over alternatives | Does not keep antibiotics for future use | Knows that antibiotic resistance can spread | Aware of antibiotics | Aware of drug resistance | Female   | Age      | Education (years) | Speaking Thai / Lao | Wealth index | Buddhist religion | Thai/Lao nationality | Majority ethnic group (Thai/Lao Loum) | Self-rated severity | Log of duration of illness episode (days) |
|---------------------------------------------|--------------------------------------------|---------------------------------------|------------------------------------------|---------------------------------------------|----------------------|--------------------------|----------|----------|-------------------|---------------------|--------------|-------------------|----------------------|---------------------------------------|---------------------|-------------------------------------------|
| <b>Chiang Rai</b>                           |                                            |                                       |                                          |                                             |                      |                          |          |          |                   |                     |              |                   |                      |                                       |                     |                                           |
| Would not buy antibiotics over the counter  | 1.00                                       |                                       |                                          |                                             |                      |                          |          |          |                   |                     |              |                   |                      |                                       |                     |                                           |
| Prefers antibiotics over alternatives       | 0.05                                       | 1.00                                  |                                          |                                             |                      |                          |          |          |                   |                     |              |                   |                      |                                       |                     |                                           |
| Does not keep antibiotics for future use    | 0.25***                                    | 0.16**                                | 1.00                                     |                                             |                      |                          |          |          |                   |                     |              |                   |                      |                                       |                     |                                           |
| Knows that antibiotic resistance can spread | 0.01                                       | -0.03                                 | 0.02                                     | 1.00                                        |                      |                          |          |          |                   |                     |              |                   |                      |                                       |                     |                                           |
| Aware of antibiotics                        | 0.03                                       | 0.05                                  | 0.00                                     | 0.07                                        | 1.00                 |                          |          |          |                   |                     |              |                   |                      |                                       |                     |                                           |
| Aware of drug resistance                    | -0.02                                      | 0.02                                  | -0.06                                    | 0.09                                        | 0.17***              | 1.00                     |          |          |                   |                     |              |                   |                      |                                       |                     |                                           |
| Female                                      | 0.13                                       | -0.02                                 | -0.02                                    | -0.02                                       | -0.03                | -0.01                    | 1.00     |          |                   |                     |              |                   |                      |                                       |                     |                                           |
| Age                                         | 0.00                                       | -0.03                                 | 0.10                                     | 0.03                                        | -0.09                | -0.11                    | -0.03    | 1.00     |                   |                     |              |                   |                      |                                       |                     |                                           |
| Education (years)                           | 0.02                                       | 0.10                                  | -0.01                                    | 0.03                                        | 0.13                 | 0.37***                  | -0.18*** | -0.50*** | 1.00              |                     |              |                   |                      |                                       |                     |                                           |
| Speaking Thai / Lao                         | 0.04                                       | 0.04                                  | 0.04                                     | 0.02                                        | 0.23***              | 0.32***                  | -0.06    | -0.08    | 0.26***           | 1.00                |              |                   |                      |                                       |                     |                                           |
| Wealth index                                | 0.05                                       | 0.09                                  | -0.03                                    | 0.04                                        | 0.07                 | 0.28***                  | -0.08    | 0.12     | 0.29***           | 0.33***             | 1.00         |                   |                      |                                       |                     |                                           |
| Buddhist religion                           | -0.04                                      | 0.02                                  | -0.03                                    | 0.08                                        | 0.02                 | 0.26***                  | 0.00     | 0.17***  | 0.19***           | 0.19***             | 0.27***      | 1.00              |                      |                                       |                     |                                           |
| Thai/Lao nationality                        | 0.04                                       | 0.03                                  | 0.01                                     | 0.04                                        | 0.12                 | 0.16**                   | -0.06    | 0.02     | 0.15**            | 0.32***             | 0.22***      | 0.24***           | 1.00                 |                                       |                     |                                           |
| Majority ethnic group (Thai/Lao Loum)       | -0.02                                      | 0.04                                  | 0.00                                     | 0.04                                        | 0.12                 | 0.33***                  | -0.03    | 0.21***  | 0.26***           | 0.32***             | 0.43***      | 0.59***           | 0.27***              | 1.00                                  |                     |                                           |
| Self-rated severity                         | 0.04                                       | 0.09                                  | 0.02                                     | -0.01                                       | 0.03                 | -0.01                    | 0.00     | -0.02    | -0.01             | -0.03               | -0.01        | -0.14*            | 0.05                 | -0.15**                               | 1.00                |                                           |
| Log of duration of illness episode (days)   | 0.02                                       | 0.06                                  | -0.03                                    | -0.04                                       | 0.03                 | 0.05                     | 0.09     | 0.04     | -0.07             | -0.04               | 0.00         | -0.02             | 0.02                 | -0.06                                 | 0.36***             | 1.00                                      |
| <b>Salavan</b>                              |                                            |                                       |                                          |                                             |                      |                          |          |          |                   |                     |              |                   |                      |                                       |                     |                                           |
| Would not buy antibiotics over the counter  | 1.00                                       |                                       |                                          |                                             |                      |                          |          |          |                   |                     |              |                   |                      |                                       |                     |                                           |
| Prefers antibiotics over alternatives       | -0.16                                      | 1.00                                  |                                          |                                             |                      |                          |          |          |                   |                     |              |                   |                      |                                       |                     |                                           |
| Does not keep antibiotics for future use    | -0.01                                      | 0.01                                  | 1.00                                     |                                             |                      |                          |          |          |                   |                     |              |                   |                      |                                       |                     |                                           |
| Knows that antibiotic resistance can spread | 0.00                                       | 0.03                                  | 0.10                                     | 1.00                                        |                      |                          |          |          |                   |                     |              |                   |                      |                                       |                     |                                           |
| Aware of antibiotics                        | -0.23***                                   | 0.04                                  | -0.07                                    | 0.01                                        | 1.00                 |                          |          |          |                   |                     |              |                   |                      |                                       |                     |                                           |
| Aware of drug resistance                    | -0.19**                                    | 0.13                                  | -0.03                                    | 0.14                                        | 0.30***              | 1.00                     |          |          |                   |                     |              |                   |                      |                                       |                     |                                           |
| Female                                      | -0.01                                      | -0.08                                 | 0.02                                     | 0.06                                        | -0.06                | 0.06                     | 1.00     |          |                   |                     |              |                   |                      |                                       |                     |                                           |
| Age                                         | -0.03                                      | 0.03                                  | 0.02                                     | 0.03                                        | 0.13                 | 0.15                     | -0.09    | 1.00     |                   |                     |              |                   |                      |                                       |                     |                                           |
| Education (years)                           | -0.13                                      | 0.13                                  | -0.02                                    | 0.14                                        | 0.20*                | 0.36***                  | -0.23*** | -0.19**  | 1.00              |                     |              |                   |                      |                                       |                     |                                           |
| Speaking Thai / Lao                         | -0.27***                                   | 0.15                                  | 0.03                                     | 0.01                                        | 0.26***              | 0.25***                  | -0.28*** | 0.11     | 0.34***           | 1.00                |              |                   |                      |                                       |                     |                                           |
| Wealth index                                | -0.33***                                   | 0.16                                  | 0.04                                     | -0.06                                       | 0.28***              | 0.38***                  | -0.02    | 0.08     | 0.40***           | 0.36***             | 1.00         |                   |                      |                                       |                     |                                           |
| Buddhist religion                           | -0.42***                                   | 0.17                                  | 0.02                                     | 0.00                                        | 0.29***              | 0.48***                  | 0.05     | 0.15     | 0.26***           | 0.44***             | 0.62***      | 1.00              |                      |                                       |                     |                                           |
| Thai/Lao nationality                        | 0.05                                       | -0.07                                 | 0.07                                     | 0.02                                        | -0.05                | -0.02                    | -0.02    | -0.19**  | 0.11              | -0.05               | -0.03        | -0.07             | 1.00                 |                                       |                     |                                           |
| Majority ethnic group (Thai/Lao Loum)       | -0.32***                                   | 0.16                                  | 0.03                                     | 0.03                                        | 0.30***              | 0.53***                  | 0.07     | 0.16     | 0.32***           | 0.36***             | 0.55***      | 0.76***           | 0.03                 | 1.00                                  |                     |                                           |
| Self-rated severity                         | 0.19**                                     | 0.02                                  | 0.07                                     | 0.01                                        | -0.12                | -0.02                    | 0.11     | -0.01    | -0.02             | -0.08               | -0.05        | -0.13             | 0.10                 | -0.08                                 | 1.00                |                                           |
| Log of duration of illness episode (days)   | 0.13                                       | 0.07                                  | 0.04                                     | 0.04                                        | -0.02                | -0.04                    | 0.11     | 0.07     | -0.08             | -0.07               | -0.05        | -0.05             | 0.10                 | -0.09                                 | 0.21***             | 1.00                                      |

15 Source: Authors' analysis of survey data.

16 Notes: Unweighted statistics.

17 \*p &lt; 0.1, \*\*p &lt; 0.05, \*\*\*p &lt; 0.01.

18 Table A3. Characteristics of individuals who received antibiotics from public, private, and informal  
19 sources.

|                                                    | Chiang Rai               |                           |                            | X <sup>2</sup> / z-score <sup>c</sup> |                |                | Salavan                  |                           |                            | X <sup>2</sup> / z-score <sup>c</sup> |                |                |
|----------------------------------------------------|--------------------------|---------------------------|----------------------------|---------------------------------------|----------------|----------------|--------------------------|---------------------------|----------------------------|---------------------------------------|----------------|----------------|
|                                                    | Public antibiotic access | Private antibiotic access | Informal antibiotic access | Publ. vs. priv.                       | Publ. vs. inf. | Priv. vs. inf. | Public antibiotic access | Private antibiotic access | Informal antibiotic access | Publ. vs. priv.                       | Publ. vs. inf. | Priv. vs. inf. |
| Number                                             | 93                       | 115                       | 35                         | 200                                   | 110            | 132            | 157                      | 38                        | 41                         | 179                                   | 178            | 77             |
| <b>Demographics</b>                                |                          |                           |                            |                                       |                |                |                          |                           |                            |                                       |                |                |
| Female                                             | 53.8%<br>(40.3–66.8)     | 59.6%<br>(46.6–71.4)      | 56.9%<br>(34.2–77.1)       | 0.54                                  | 0.11           | 0.05           | 71.5%<br>(63.8–78.2)     | 41.0%<br>(23.5–61.1)      | 71.8%<br>(51.2–86.1)       | 9.13***                               | 0.07           | 6.63**         |
| Age                                                | 43<br>(13)               | 48<br>(14)                | 40<br>(11)                 | 1.41                                  | 0.55           | 3.54***        | 35<br>(19)               | 33<br>(12)                | 39<br>(18)                 | 0.42                                  | 0.96           | 0.94           |
| Education (years)                                  | 6.2<br>(4.9)             | 5.8<br>(5.2)              | 8.0<br>(3.8)               | 0.30                                  | 1.18           | 2.14**         | 4.7<br>(6.3)             | 8.1<br>(5.9)              | 5.9<br>(5.5)               | 4.75***                               | 0.81           | 1.48           |
| Speaking Thai / Lao                                | 92.3%<br>(81.9–96.9)     | 85%<br>(73.7–92)          | 98%<br>(86.1–99.7)         | 2.04                                  | 1.50           | 4.63**         | 92.7%<br>(89.3–95.1)     | 100.0%<br>(100.0–100.0)   | 100.0%<br>(100.0–100.0)    | 7.80***                               | 4.96**         | ..             |
| Wealth index                                       | 0.6<br>(0.1)             | 0.7<br>(0.1)              | 0.7<br>(0.1)               | 2.42**                                | 3.48***        | 2.52**         | 0.4<br>(0.2)             | 0.5<br>(0.1)              | 0.5<br>(0.2)               | 3.86***                               | 0.86           | 1.27           |
| Buddhist religion                                  | 78.5%<br>(64.8–87.8)     | 77.2%<br>(63.9–86.6)      | 89.0%<br>(74.4–95.8)       | 0.03                                  | 1.44           | 2.14           | 66.5%<br>(58.3–73.8)     | 78.9%<br>(52.9–92.5)      | 79.2%<br>(58.9–91.0)       | 1.05                                  | 2.61           | <0.01          |
| Thai/Lao nationality                               | 97.1%<br>(89.8–99.2)     | 95.9%<br>(88.8–98.5)      | 98%<br>(86.1–99.7)         | 0.14                                  | 0.03           | 0.28           | 99%<br>(92.9–99.9)       | 100.0%<br>(100.0–100.0)   | 97.6%<br>(84.0–99.7)       | 0.38                                  | 0.66           | 24.41***       |
| Majority ethnic group (Thai/Lao Loum)              | 58.8%<br>(45.3–71.1)     | 64.6%<br>(52.3–75.3)      | 81.9%<br>(65.8–91.4)       | 0.60                                  | 7.36***        | 2.84*          | 58.6%<br>(48.9–67.7)     | 69.9%<br>(45.6–86.6)      | 68.2%<br>(44.4–85.2)       | 0.71                                  | 0.67           | 0.03           |
| <b>Antibiotic knowledge / attitudes</b>            |                          |                           |                            |                                       |                |                |                          |                           |                            |                                       |                |                |
| Aware of antibiotics                               | 97.5%<br>(90.4–99.4)     | 95.7%<br>(88.6–98.4)      | 93.3%<br>(64.5–99.1)       | 0.42                                  | 2.70           | 0.24           | 88.7%<br>(82.3–92.9)     | 92.7%<br>(72.2–98.4)      | 100.0%<br>(100.0–100.0)    | 1.21                                  | 5.50**         | 2.32           |
| Aware of drug resistance <sup>a</sup>              | 75.0%<br>(62.5–84.3)     | 76.5%<br>(64.9–85.1)      | 90.2%<br>(76.4–96.4)       | 0.06                                  | 3.35*          | 3.63*          | 66.3%<br>(57.8–73.8)     | 84.7%<br>(61.1–95.1)      | 79.5%<br>(61.3–90.5)       | 2.94*                                 | 2.22           | 0.18           |
| Links drug resistance to AMR concepts <sup>b</sup> | 1.7%<br>(0.3–9.5)        | 5.4%<br>(2.0–13.6)        | 1.3%<br>(0.2–9.0)          | 1.39                                  | 0.01           | 5.17**         | 4.4%<br>(2.0–9.3)        | 9.0%<br>(1.9–33.5)        | 13.4%<br>(5.6–28.7)        | 0.89                                  | 4.92**         | 0.27           |
| Would not buy antibiotics over the counter         | 62.0%<br>(48.2–74.1)     | 62.1%<br>(48.3–74.2)      | 42.0%<br>(22.0–65.0)       | <0.01                                 | 4.19**         | 4.44**         | 44.5%<br>(35.9–53.5)     | 18.3%<br>(9.3–32.7)       | 23.3%<br>(12.3–39.6)       | 13.92***                              | 24.99***       | 0.62           |
| Prefers antibiotics over alternatives              | 62.7%<br>(49.6–74.2)     | 50.2%<br>(36.8–63.6)      | 70.3%<br>(46.2–86.7)       | 2.48                                  | 1.17           | 3.21*          | 22.8%<br>(16.8–30.2)     | 33.7%<br>(19.5–51.7)      | 29.3%<br>(13.7–52.0)       | 2.52                                  | 0.37           | 0.36           |
| Does not keep antibiotics for future use           | 54.3%<br>(41.2–66.8)     | 53.9%<br>(41.7–65.6)      | 38.1%<br>(18.9–62.0)       | <0.01                                 | 0.88           | 3.35*          | 21.1%<br>(14.2–30.2)     | 14.0%<br>(4.6–35.4)       | 13.9%<br>(5.2–32.1)        | 0.52                                  | 2.07           | <0.01          |
| Knows that antibiotic resistance can spread        | 8.1%<br>(3.9–16.2)       | 10.9%<br>(5.7–19.9)       | 6.5%<br>(1.6–23.2)         | 0.51                                  | 0.25           | 0.53           | 1.9%<br>(0.5–6.6)        | 1.8%<br>(0.2–12.4)        | 0.0%<br>(0.0–0.0)          | <0.01                                 | 1.90           | 0.95           |
| Answer score (0 to 4)                              | 1.9<br>(0.9)             | 1.8<br>(0.9)              | 1.6<br>(0.8)               | 0.54                                  | 1.72*          | 1.05           | 0.9<br>(1.1)             | 0.7<br>(0.7)              | 0.7<br>(0.6)               | 1.86*                                 | 1.87*          | 0.05           |

20 Source: Authors' analysis of survey data.

21 Notes: Including antibiotics and unconfirmed medicines that may include antibiotics. Illness-level data, including only completed  
22 illnesses experienced by respondent or a child under their supervision. Population-weighted statistics, accounting for complex survey  
23 design. Multiple types of healthcare access per individual and illness episode possible.

24 a. Comparing Thai “due yah” with the combined Lao “due yah” and “lueng yah.”

25 b. Corresponding to interpretation of “drug resistance” as “Reference to antibiotics, drug-resistant germs” in Exhibit 6.

26 c. X<sup>2</sup> and Wilcoxon rank-sum tests, omitting simultaneous antibiotic access from more than one type of healthcare provider, which was  
27 the case in 82/958 [8.6%] of all pairwise comparisons of antibiotic access.
