# Supplementary material for: Antibiotic knowledge, attitudes and practices: new insights from cross-sectional rural health behaviour surveys in low-income and middle-income South-East Asia
Source: PubMed Central journal article supplement (PMC6707701; doi:10.1136/bmjopen-2018-028224), 2019-08-20
Supplement: bmjopen-2018-028224supp003.pdf [file bmjopen-2018-028224supp003.pdf]

OxTREC reference: 528-17

ANTIBIOTICS AND ACTIVITY SPACES

## INTERVIEW GUIDES – COGNITIVE INTERVIEWS FOR SURVEY TESTING

บทสัมภาษณ์ – การสัมภาษณ์กระบวนการคิดเพื่อการทดสอบแบบสอบถาม

บทสัมภาษณ์ - การสัมภาษณ์กระบวนการคิดเพื่อการทดสอบคำถาม

**Objective** วัตถุประสงค์ จุดประสงค์

To understand how survey participants understand the survey questions and arrive at their answers. เพื่อเรียนรู้ว่าผู้เข้าร่วมงานวิจัยมีการทำความเข้าใจคำถามที่ใช้ในแบบสอบถามอย่างไร และมีความคิดอย่างไรก่อนตัดสินใจตอบคำถามแต่ละข้อ เพื่อเรียนรู้ว่าผู้เข้าร่วมงานวิจัยมีความเข้าใจคำถามที่ใช้ในแบบสอบถามแบบใด และมีความคิดแบบใดก่อนตัดสินใจตอบคำถามแต่ละข้อ

**Introduction** บทนำ

<Obtaining verbal informed consent in accordance with Oral Consent Script> <ดำเนินการขอคำยินยอมโดยใช้ข้อความสำหรับอธิบายงานวิจัยและขอคำยินยอมเข้าร่วมการวิจัยด้วยวาจา> <ดำเนินการขอคำยินยอมโดยใช้ข้อความสำหรับอธิบายวัตถุประสงค์และขอคำยินยอมเข้าร่วมงานวิจัยด้วยวาจา>

Thank you for agreeing to participate in this study. ขอขอบคุณท่านสำหรับการตกลงเข้าร่วมการวิจัยครั้งนี้ ขอขอบคุณท่านสำหรับงานวิจัยที่เข้าร่วม

**Part I – About Yourself** ส่วนที่ 1 – เกี่ยวกับตัวท่าน ส่วนที่ 1 - ทั่วถึงกับตัวท่าน

Let us start with a few questions about yourself. เราจะเริ่มโดยถามคำถามเกี่ยวกับข้อมูลส่วนตัวของท่าน เราจะไม่ถามคำถามที่เกี่ยวกับข้อมูลส่วนตัวของท่าน

Guiding question: Who is my informant? คำถามนำ: ผู้ให้สัมภาษณ์คือใคร คำถามนำ: ผู้ให้สัมภาษณ์แบบใด

1. How old are you? อายุของท่าน อายุท่าน
2. What is your level of education? การศึกษาสูงสุดของท่าน การศึกษาสูงสุดของท่าน
3. What is your ethnicity and nationality? เชื้อชาติ และ สัญชาติของท่าน เชื้อชาติและสัญชาติของท่าน

**Part II – Practicing the “Think Aloud” Technique** ส่วนที่ 2 – เทคนิคการคิดออกเสียง (การบรรยายกระบวนการคิด) ส่วนที่ 2 - ฝึกปฏิบัติ

Thank you. As we are trying to improve our survey, you can help us develop the questionnaire by participating in this interview. I would like to ask you to describe your thoughts as you think about the question and the answer as though you are talking to yourself. For example, what do you think as you receive the question? What does the question make you think of? In what way do you want answer to question? How do you arrive at your answer? Let me give you an example so you understand this type of interview better.

Let's say I was asked a question about “What do you see when you go from your home to the nearest temple?” If I was thinking out loud, I would say “[interviewer describing their own village].” So you can see how it works, though that was only one of many ways. The important thing is that there are no right or wrong answers. What really matters is your view and thought process. And this is what I would like you to share with me. So now it is your turn to practice.

ขอบคุณครับ/ค่ะ เนื่องจากเรากำลังปรับปรุงแบบสอบถาม เราสามารถช่วยเราพัฒนาแบบสอบถามนี้ได้โดยการเข้าร่วมการสัมภาษณ์นี้ ซึ่งเราจะขอให้ท่านบรรยายความคิดของท่านในขณะที่ท่านพิจารณาคำถามและคำตอบเสมือนกับท่านกำลังคุยกับตนเอง เช่น ท่านคิดอย่างไรเมื่อท่านได้รับคำถาม คำถามทำให้ท่านนึกถึงอะไรบ้าง ท่านต้องการตอบคำถามเหล่านั้นอย่างไร ท่านได้คำตอบมาได้อย่างไร เราจะยกตัวอย่างให้ท่านหนึ่งตัวอย่างเพื่อให้ท่านสามารถเข้าใจการสัมภาษณ์ในลักษณะนี้มากขึ้น

ยกตัวอย่าง ถ้าเราต้องตอบคำถามที่ว่า “ท่านมองเห็นอะไรบ้างหากท่านเดินจากบ้านไปวัดที่ใกล้ที่สุด” และเราต้องบรรยายความคิดของเราให้ท่านฟัง เราจะพูดว่า “ผู้สัมภาษณ์บรรยายการเดินทางในหมู่บ้านของตนเอง” ซึ่งเป็นเพียงหนึ่งในหลายหลายวิธีที่ท่านสามารถใช้ได้ สิ่งที่สำคัญที่สุดเกี่ยวกับการคิดออกเสียงของท่านคือคำตอบของท่านจะไม่ถูกตัดสินว่าถูกหรือผิด เพราะสิ่งที่เราต้องการเรียนรู้มากที่สุดคือมุมมองและวิธีการคิดของท่าน และนั่นคือสิ่งที่เราอยากให้คุณแบ่งปันกับเรา ดังนั้นเราจึงขอให้ท่านลองคิดออกเสียงกับเราในคำถามต่อไปนี้



OxTREC reference: 528-17

ANTIBIOTICS AND ACTIVITY SPACES

|                                                                                                                                                                                                                                                                                                                                                                                                                                                                                                                  |                                                                                                                                                                                                                                                                                                                                                                                                                                                                                                                                                                                                                                                                                                                                                      |
|------------------------------------------------------------------------------------------------------------------------------------------------------------------------------------------------------------------------------------------------------------------------------------------------------------------------------------------------------------------------------------------------------------------------------------------------------------------------------------------------------------------|------------------------------------------------------------------------------------------------------------------------------------------------------------------------------------------------------------------------------------------------------------------------------------------------------------------------------------------------------------------------------------------------------------------------------------------------------------------------------------------------------------------------------------------------------------------------------------------------------------------------------------------------------------------------------------------------------------------------------------------------------|
| <p>Where do you spend most of your time interacting with other people from your village? <i>ທ່ານໃຜ້ເວລາສ່ວນໃຫຍ່ໃນການພົບປະພູດຄູຍກັບບ້ານໃນ ພູ່ບ້ານຂອງທ່ານໃນສະຖານທີ່ໃດ ທ່ານໃຜ້ເວລາຫຼາຍທີ່ສຸດໃນການ ພົບປະໂອ້ລົມກັບຊາວບ້ານໃນໝູ່ບ້ານຂອງທ່ານໃນບ່ອນໃດ ແດ່</i></p> <p><b>[mark all that apply or select 99 if respondent indicates no noteworthy interaction] [ຕອບໄດ້ ມາດກວ່າ 1 ສ່ວນເລືອກ ຫຼືເລືອກ 99 ຫາກບໍ່ມີປະໂຫຍດທີ່ເຫັນວ່າສຳຄັນ]</b></p> <p><b>[ຕອບໄດ້ຫຼາຍກວ່າ 1 ຕົວເລືອກ ຫຼືເລືອກ 99 ຖ້າບໍ່ມີການ ພົບປະໂອ້ລົມ]</b></p> | <p>Field (specify) <i>ໂຮມ (ໂປຣເຊບ) ໂຮມ (ກະລຸນາບອກ)</i> _____ 1</p> <p>Temple (specify) <i>ວັດ (ໂປຣເຊບ) ວັດ (ກະລຸນາບອກ)</i> _____ 2</p> <p>Local store (specify) <i>ຮ້ານຄ້າ (ໂປຣເຊບ) ຮ້ານຄ້າ (ກະລຸນາບອກ)</i> _____ 3</p> <p>Market (specify) <i>ຕະຫຼາດ (ໂປຣເຊບ) ຕະຫຼາດ (ກະລຸນາບອກ)</i> _____ 4</p> <p>Children's schools (specify) <i>ໂຮງຮຽນຂອງບຸກຄົນ (ໂປຣເຊບ) ໂຮງຮຽນຂອງລູກ (ກະລຸນາບອກ)</i> _____ 5</p> <p>Home (specify) <i>ທີ່ບ້ານ (ໂປຣເຊບ) ເຮືອນ (ກະລຸນາບອກ)</i> _____ 6</p> <p>Workplace (specify) <i>ທີ່ທຳການ (ໂປຣເຊບ) ບ່ອນເຮັດວຽກ (ກະລຸນາບອກ)</i> _____ 7</p> <p>Other site (specify) <i>ອື່ນໆ (ໂປຣເຊບ) ອື່ນໆ (ກະລຸນາບອກ)</i> _____ 8</p> <p>I don't interact notably with others <i>ບໍ່ມີປະໂຫຍດທີ່ເຫັນວ່າສຳຄັນກັບບ້ານຄົນອື່ນໆ</i> _____ 99</p> |
|------------------------------------------------------------------------------------------------------------------------------------------------------------------------------------------------------------------------------------------------------------------------------------------------------------------------------------------------------------------------------------------------------------------------------------------------------------------------------------------------------------------|------------------------------------------------------------------------------------------------------------------------------------------------------------------------------------------------------------------------------------------------------------------------------------------------------------------------------------------------------------------------------------------------------------------------------------------------------------------------------------------------------------------------------------------------------------------------------------------------------------------------------------------------------------------------------------------------------------------------------------------------------|

- How do you understand “interacting?” ສຳລັບທ່ານ ທ່ານຄິດວ່າຄຳວ່າ “ພົບປະພູດຄູຍ” ມີຄວາມໝາຍວ່າແນວໃດ ສຳລັບທ່ານ ທ່ານຄິດວ່າ “ການພົບປະໂອ້ລົມ” ມີຄວາມໝາຍວ່າແນວໃດ
- What does “most of your time” mean to you? Which time frame did you have in mind? ຄຳວ່າ “ເວລາສ່ວນໃຫຍ່” ສຳລັບທ່ານມີຄວາມໝາຍວ່າແນວໃດ ໃນຂະນະທີ່ທ່ານຕອບຄຳຖາມໃນໃຈຂອງທ່ານນີ້ກະທຽວເວລາໃດ ຄຳວ່າ “ເວລາຫຼາຍທີ່ສຸດ” ສຳລັບທ່ານມີຄວາມໝາຍວ່າແນວໃດ
- What are the possible places where people spend time together? ມີທີ່ໃດບ່ອນທີ່ບ້ານສາມາດໃຜ້ເວລາຮ່ວມກັນໄດ້ ທີ່ຊາວບ້ານສາມາດໃຜ້ເວລາຮ່ວມກັນໄດ້
- Please ask us the same question in your own words. ກະລຸນາຖາມຄຳຖາມນີ້ກັບເຮົາໂດຍໃຜ້ຄຳເວົ້າໃນແບບຂອງທ່ານເອງ ກະລຸນາຖາມຄຳຖາມນີ້ກັບເຮົາໂດຍໃຜ້ຄຳເວົ້າໃນແບບຂອງທ່ານເອງ
- What kind of things do you normally talk about when you interact with other villagers? ໂດຍປົກກະຕິທ່ານພົບປະກັບ ຊາວບ້ານຄົນອື່ນໆ ທ່ານລົມເລື່ອງຫຍັງແດ່

OxTREC reference: 528-17

ANTIBIOTICS AND ACTIVITY SPACES

6. I will now ask you a set of questions, regarding the people you interact with. **ชุดคำถามต่อไปจะถามถึงบุคคลที่ท่านพบปะพูดคุยด้วย ชุดคำถามต่อไปจะถามถึงบุคลิคนิสัยที่ท่านมีปะโฮลิมนำ**

| With whom do you interact on a regular basis? <b>โดยปกติในชีวิตประจำวันท่านพบปะพูดคุยกับใครบ้าง โดยปกติในชีวิตประจำวันท่านมีปะโฮลิมนำกับใครบ้าง</b> |                                                                                                                                                                                                                                                                                                                                                                 |                                                       |                                                                                                                                                                                                                                                                                                      |                                                                                                       |                                                                                                                                                                                                                                                                                                      |                                                                                                                                                                            |                                                                                                                                                                                                                                                                                                                                                                                      |                                                                                                                                                                                                                                                                                                                                                                                                                                     |                                                                                                                                                                                                                                                                                                   |
|-----------------------------------------------------------------------------------------------------------------------------------------------------|-----------------------------------------------------------------------------------------------------------------------------------------------------------------------------------------------------------------------------------------------------------------------------------------------------------------------------------------------------------------|-------------------------------------------------------|------------------------------------------------------------------------------------------------------------------------------------------------------------------------------------------------------------------------------------------------------------------------------------------------------|-------------------------------------------------------------------------------------------------------|------------------------------------------------------------------------------------------------------------------------------------------------------------------------------------------------------------------------------------------------------------------------------------------------------|----------------------------------------------------------------------------------------------------------------------------------------------------------------------------|--------------------------------------------------------------------------------------------------------------------------------------------------------------------------------------------------------------------------------------------------------------------------------------------------------------------------------------------------------------------------------------|-------------------------------------------------------------------------------------------------------------------------------------------------------------------------------------------------------------------------------------------------------------------------------------------------------------------------------------------------------------------------------------------------------------------------------------|---------------------------------------------------------------------------------------------------------------------------------------------------------------------------------------------------------------------------------------------------------------------------------------------------|
| a) What is the name of the person?<br><i>ชื่อ</i>                                                                                                   | b) How is this person related to you?<br><i>ความสัมพันธ์กับท่าน ความสัมพันธ์กับท่าน</i><br><b>[give examples if respondent is unsure about answer categories]</b><br><i>[หากผู้ให้สัมภาษณ์ไม่แน่ใจในหมวดคำตอบให้ ยกตัวอย่างคำตอบไว้]</i><br><i>[ถ้าผู้ใช้ไม่สามารถระบุชื่อในหมวดคำตอบ ให้ตอบ โดยใช้กริยาต่างๆตามได้]</i>                                        | c) What is the sex of this person?<br><i>เพศ</i>      | d) Where does this person live?<br><i>ที่อยู่</i>                                                                                                                                                                                                                                                    | e) What is the name of the household head of this person?<br><i>ใครคือหัวหน้าครัวเรือนของบุคคลนี้</i> | f) How often do you interact with this person?<br><i>ท่านพบปะพูดคุยกับบุคคลนี้บ่อยเท่าใด</i><br><i>ท่านมีปะโฮลิมนำกับบุคคลนี้บ่อยปานใด</i>                                                                                                                                                           | g) How do you interact with this person?<br><i>ท่านพบปะพูดคุยกับบุคคลนี้อย่างไร</i><br><i>ท่านมีปะโฮลิมนำกับบุคคลนี้บ่อยปานใด</i>                                          | h) How often do your conversations relate to health and well-being?<br><i>ท่านมีการสนทนากับบุคคลนี้เกี่ยวกับเรื่องสุขภาพบ่อยเท่าใด</i><br><i>ท่านมีปะโฮลิมนำกับบุคคลนี้เกี่ยวกับเรื่องสุขภาพบ่อยปานใด</i>                                                                                                                                                                            | i) What health-related subjects do your conversations cover?<br><i>หัวข้อการสนทนาเกี่ยวกับสุขภาพของท่านกับบุคคลนี้คือเรื่องอะไร</i><br><i>หัวข้อสนทนาเกี่ยวกับสุขภาพของท่านกับบุคคลนี้เหมือนเรื่องอื่นๆ</i>                                                                                                                                                                                                                         |                                                                                                                                                                                                                                                                                                   |
| Contact 1<br><i>คนที่ 1</i><br><i>คนที่ 1</i>                                                                                                       | Spouse คู่สมรส คู่แต่งงาน..... 1<br>Parent บิด มารดา แม่..... 2<br>Child บุตร ลูก..... 3<br>Sibling พี่น้อง อ้ายน้อง ..... 4<br>Other relative อู่น้า น้า..... 5<br>Neighbour เพื่อนบ้าน เพื่อนบ้าน..... 6<br>Friend (if not neighbour) เพื่อน (ที่ไม่ใช่เพื่อนบ้าน) ..... 7<br>Other villager ชาวบ้านคนอื่น..... 8<br>Other (specify) อื่นๆ (โปรดระบุ) ..... 9 | Female...1<br><i>หญิง</i><br>Male.....2<br><i>ชาย</i> | In village .....1<br>(specify: _____)<br><i>ในหมู่บ้าน</i><br>(โปรดระบุ: _____)<br>In township (specify: _____)<br><i>ในตำบล (ระบุ: _____)</i><br>Outside village ...2<br>(specify: _____)<br><i>นอกหมู่บ้าน</i><br>(โปรดระบุ: _____)<br>In township (specify: _____)<br><i>ในตำบล (ระบุ: _____)</i> | Name of household head <i>ชื่อหัวหน้าครัวเรือน:</i><br>_____                                          | Daily or more often <i>ทุกวันหรือบ่อยกว่า</i> .....4<br>Weekly or few times/week <i>ทุกสัปดาห์หรือมากกว่าหนึ่งครั้งต่อสัปดาห์</i> .....3<br>Monthly or few times/month <i>ทุกเดือนหรือมากกว่าหนึ่งครั้งต่อเดือน</i> .....2<br>Yearly or few times/year <i>ทุกปีหรือมากกว่าหนึ่งครั้งต่อปี</i> .....1 | Face-to-face <i>ตัวต่อตัว</i> ..... 1<br>Voice call <i>โทรศัพท์</i> ..... 2<br>Messenger <i>ข้อความหรือไลน์</i> ..... 3<br>Other (specify) <i>อื่นๆ (โปรดระบุ)</i> ..... 4 | Always (100%) <i>เป็นประจำ</i> ..... 5<br>Nearly always (<100%) <i>เกือบเป็นประจำ (&lt;100%)</i> ..... 4<br>Often (<90%) <i>บ่อยครั้ง (&lt;90%)</i> ..... 3<br>Sometimes (<50%) <i>บางครั้ง (&lt;50%)</i> ..... 2<br>Hardly ever (<10%) <i>แทบไม่เลย (&lt;10%)</i> ..... 1<br>Never (0%) <i>ไม่เลยเลย (0%)</i> ..... 0<br><b>→ [go to next contact]</b><br><b>[ข้ามไปบุคคลต่อไป]</b> | Talk about general well-being <i>ได้ถามสารทุกข์สุกดิบทั่วไป</i> ..... 1<br>Update on health knowledge/news <i>อัปเดตเรื่องความรู้หรือข่าวสารสุขภาพใหม่ๆ</i> ..... 2<br>Update on personal health status ..... 3<br>Advice on diagnosis <i>ให้คำแนะนำเกี่ยวกับการวินิจฉัย</i> ..... 4<br>Advice on doctors <i>ให้คำแนะนำเกี่ยวกับแพทย์</i> ..... 5<br>Advice on treatment/medicine <i>ให้คำแนะนำเกี่ยวกับวิธีการรักษา/ยา</i> ..... 6 | <b>[Mark all that apply]</b> <i>[ตอบได้มากกว่า 1 ข้อเลือก]</i> <b>[ตอบได้หลายข้อ]</b><br><i>[If respondent does not discuss health, then move on to next contact after indicating "never"]</i> <i>[หากผู้ให้สัมภาษณ์ไม่มีการพูดคุยเรื่องสุขภาพให้ผู้สัมภาษณ์ใส่รหัส 0 และข้ามไปที่บุคคลต่อไป]</i> |

OxTREC reference: 528-17

ANTIBIOTICS AND ACTIVITY SPACES

|                                                                                                                                                                                                                                     |                  |                   |     |     |                  | Less often or never ไม่ค่อยบ่อย<br>หรือไม่เคยเลย บ่อยเลย .....0 |         |             |                   | Emotional support/reassure ให้กำลังใจ ให้ความมั่นใจ ใช้ทำ<br>กำลังใจ ใช้ความมั่นใจ .....7<br>Provide help during illness ให้ความช่วยเหลือระหว่างการป่วย<br>ใช้ความช่วยเหลือตอนป่วย .....8<br>Other (specify) อื่นๆ (โปรดระบุ) อื่นๆ (ระบุมาบอก) ____ .9 |
|-------------------------------------------------------------------------------------------------------------------------------------------------------------------------------------------------------------------------------------|------------------|-------------------|-----|-----|------------------|-----------------------------------------------------------------|---------|-------------|-------------------|---------------------------------------------------------------------------------------------------------------------------------------------------------------------------------------------------------------------------------------------------------|
| Contact 2<br>คนที่ 2<br>คนที่ 2                                                                                                                                                                                                     | Name ชื่อ<br>สง. | 1 2 3 4 5 6 7 8 9 | 1 2 | 1 2 | Name ชื่อ<br>สง. | 0 1 2 3 4                                                       | 1 2 3 4 | 0 1 2 3 4 5 | 1 2 3 4 5 6 7 8 9 |                                                                                                                                                                                                                                                         |
| [continue<br>until Contact<br>x<br>maximum 10<br>contacts]<br>[บันทึกบุคคลที่มี<br>ความเกี่ยวข้อง<br>ระหว่างการเจ็บป่วย<br>ทุกคน ไม่เกิน 10 คน]<br>[บันทึกญาติ<br>ที่มีความ<br>เกี่ยวข้องช่วย<br>ดูแลสุขภาพ<br>ผู้ป่วยว่า 10<br>คน] | Name ชื่อ<br>สง. | 1 2 3 4 5 6 7 8 9 | 1 2 | 1 2 | Name ชื่อ<br>สง. | 0 1 2 3 4                                                       | 1 2 3 4 | 0 1 2 3 4 5 | 1 2 3 4 5 6 7 8 9 |                                                                                                                                                                                                                                                         |

OxTREC reference: 528-17

ANTIBIOTICS AND ACTIVITY SPACES

- a. How did you go about answering these questions? *ท่านมีวิธีการตอบคำถามเหล่านี้ได้อย่างไร ท่านมีวิธีการตอบคำถามเหล่านี้*  
แนวใด
- b. What did you imagine while answering the question, e.g. the “interaction setting” that you had in mind?  
*ในขณะที่ท่านตอบคำถามเหล่านี้ท่านมีภาพอะไรอยู่ในใจ เช่น ลักษณะของสถานที่ ฯลฯ ในขณะที่ท่านตอบคำถามเหล่านี้ท่านมีภาพที่ยังอยู่ในใจ*  
เห็น ลักษณะของสถานที่ และอื่นๆ
- c. What time period were you thinking of? *จากคำตอบที่ท่านให้เรารู้เกี่ยวกับบุคคลที่ท่านมีปฏิสัมพันธ์ด้วย ท่านนึกถึงช่วงเวลาใด* จากคำตอบ  
ที่ท่านให้เรารู้เกี่ยวกับบุคคลที่ท่านมีปฏิสัมพันธ์ด้วย ท่านนึกถึงช่วงเวลาใด
- d. How did you come up with the order of people? Why did you think of these people first rather than others?  
*ท่านมีการเรียงลำดับบุคคลเหล่านี้ได้อย่างไร เพราะเหตุใดท่านจึงนึกถึงบุคคลเหล่านี้ก่อนเราเป็นลำดับแรกๆ หากเปรียบเทียบกับบุคคลอื่น ท่านมีการลวงลำดับ*  
บุคคลเหล่านี้แบบใด ย้อนหลังท่านจึงบอกชื่อบุคคลเหล่านี้กับก่อนคนอื่น
- e. What is the best way we can find these people from your interaction circle? How would you describe  
where they live? *หากเราต้องการพูดคุยกับบุคคลที่ท่านกล่าวถึงเหล่านี้ เราสามารถพบพวกเขาได้อย่างไร ท่านสามารถอธิบายที่อยู่ของพวกเขาได้*  
*อย่างไร* ถ้าเราต้องการพบบุคคลที่ท่านกล่าวถึงเหล่านี้ เราสามารถพบพวกเขาได้อย่างไร ท่านสามารถอธิบายที่อยู่ของพวกเขา  
ได้อย่างไร

**Part IV – Health-Related Survey Questions ส่วนที่ 4 – คำถามเกี่ยวกับสุขภาพ ส่วนที่ 4 - คำถามเกี่ยวกับสุขภาพ**

*Thank you for this. Now we come to a part where I will ask you some questions about health and health providers around here. ขอขอบคุณครับ/ค่ะ คำถามช่วงต่อไปจะเป็นเรื่องสุขภาพและสถานบริการสุขภาพในพื้นที่นี้ ขอใจ คำถามต่อไปนี้จะเป็นคำถามเกี่ยวกับสุขภาพ และสถานะบริการสุขภาพในพื้นที่นี้*

7. For the following question, can you please “think out loud” about your answers? *เราขอให้คุณ “คิดออกเสียง” ในระหว่างที่*  
*ท่านตอบคำถามต่อไปนี้ เรารู้จักใช้ท่าน “คิดออกเสียง” ในระหว่างที่*

|                                                                                                                                                                                                                                                                                                                                                                                                                                                                                                              |                                                                                                                                        |                                                                                                                 |
|--------------------------------------------------------------------------------------------------------------------------------------------------------------------------------------------------------------------------------------------------------------------------------------------------------------------------------------------------------------------------------------------------------------------------------------------------------------------------------------------------------------|----------------------------------------------------------------------------------------------------------------------------------------|-----------------------------------------------------------------------------------------------------------------|
| I would now like to ask you about the sources of health advice and medicine or other treatment that are available to you. Please think about all the places where you can go to get advice, treatment, or drugs if you (or your children) are sick. <i>คำถามต่อไปเป็นคำถามเกี่ยวกับสถานที่หรือบุคคลที่ท่านสามารถรับคำปรึกษา ปรึกษา หรือ รับการรักษารักษาอื่นๆ ได้ กรุณานึกถึงสถานที่ทุกแห่งหรือคนทุกคนที่ท่านสามารถรับคำปรึกษา ปรึกษา รักษารักษา หรือรับยา หากท่านหรือเด็กในปกครองของท่านป่วย คำถามต่อไป</i> | Drug dispensary, other local store selling medicine <i>ร้านขายของชำหรือร้านค้าทั่วไปที่มีการจำหน่ายยา ร้านที่ออกไปที่มีบริการขายยา</i> | Medical treatment <i>เพื่อการรักษา</i> <i>สำหรับผู้ป่วย</i> ..... 1                                             |
|                                                                                                                                                                                                                                                                                                                                                                                                                                                                                                              |                                                                                                                                        | Medical advice <i>เพื่อคำแนะนำในการรักษา</i> <i>สำหรับคำแนะนำในการป่วย</i> ..... 2                              |
|                                                                                                                                                                                                                                                                                                                                                                                                                                                                                                              |                                                                                                                                        | Access to medicine <i>เพื่อซื้อ/รับยา</i> <i>สำหรับซื้อ/รับยา</i> ..... 3                                       |
|                                                                                                                                                                                                                                                                                                                                                                                                                                                                                                              |                                                                                                                                        | Don't consider this provider <i>ไม่มีการให้บริการประเภทนี้</i> <i>ไม่มีการใช้บริการประเภทนี้</i> ..... 0        |
| Which of the following options do you consider for medical treatment, advice, or to get medicine? <i>ท่านเคยได้รับคำปรึกษา ปรึกษา หรือ รับ</i>                                                                                                                                                                                                                                                                                                                                                               | Pharmacist <i>เภสัชกร</i> <i>ผู้ขายยา</i>                                                                                              | Medical treatment <i>เพื่อการรักษา</i> <i>สำหรับผู้ป่วย</i> ..... 1                                             |
|                                                                                                                                                                                                                                                                                                                                                                                                                                                                                                              |                                                                                                                                        | Medical advice <i>เพื่อคำแนะนำในการรักษา</i> <i>สำหรับคำแนะนำในการป่วย</i> ..... 2                              |
|                                                                                                                                                                                                                                                                                                                                                                                                                                                                                                              |                                                                                                                                        | Access to medicine <i>เพื่อซื้อ/รับยา</i> <i>สำหรับซื้อ/รับยา</i> ..... 3                                       |
|                                                                                                                                                                                                                                                                                                                                                                                                                                                                                                              |                                                                                                                                        | Don't consider this provider <i>ไม่มีการให้บริการประเภทนี้</i> <i>ไม่มีการใช้บริการประเภทนี้</i> ..... 0        |
| Private clinic <i>คลินิกเอกชน</i>                                                                                                                                                                                                                                                                                                                                                                                                                                                                            | Private clinic <i>คลินิกเอกชน</i>                                                                                                      | Medical treatment <i>เพื่อการรักษา</i> <i>สำหรับผู้ป่วย</i> ..... 1                                             |
|                                                                                                                                                                                                                                                                                                                                                                                                                                                                                                              |                                                                                                                                        | Medical advice <i>เพื่อคำแนะนำในการรักษา</i> <i>สำหรับคำแนะนำในการป่วย</i> ..... 2                              |
|                                                                                                                                                                                                                                                                                                                                                                                                                                                                                                              |                                                                                                                                        | Access to medicine <i>เพื่อซื้อ/รับยา</i> <i>สำหรับซื้อ/รับยา</i> ..... 3                                       |
|                                                                                                                                                                                                                                                                                                                                                                                                                                                                                                              |                                                                                                                                        | Don't consider this provider <i>ไม่มีการให้บริการประเภทนี้</i> <i>ไม่มีการใช้บริการประเภทนี้</i> ..... 0        |
|                                                                                                                                                                                                                                                                                                                                                                                                                                                                                                              |                                                                                                                                        | Don't know such a provider <i>ไม่รู้จักผู้ให้บริการประเภทนี้</i> <i>ไม่รู้จักผู้ให้บริการประเภทนี้</i> ..... 99 |



OxTREC reference: 528-17

## ANTIBIOTICS AND ACTIVITY SPACES

|                                                                                                                                                                |  |
|----------------------------------------------------------------------------------------------------------------------------------------------------------------|--|
| Can you please describe the symptoms or problem in your own words? ກຽດພາອຸປະສານອາການຫຼືອັນໂຮມໃນແບບທີ່ທ່ານເຂົ້າໃຈ ກະລຸນາອະທິບາຍອາການຫຼືບັນຫາໃນແບບທີ່ທ່ານເຂົ້າໃຈ |  |
|----------------------------------------------------------------------------------------------------------------------------------------------------------------|--|



OxTREC reference: 528-17

ANTIBIOTICS AND ACTIVITY SPACES

|                                                                                                                                                                                                                                                                                                                                                                                                                                                                                                                                                                                                                                                                                                                                                                                                                                                                                                                                                                                                                                                                                                                                                                                                                                                                                                                                                                                                                                                                                                                                                                                                           |                                                                                                                                                                                                                                                                                                                                                                                                                                                                                                    |
|-----------------------------------------------------------------------------------------------------------------------------------------------------------------------------------------------------------------------------------------------------------------------------------------------------------------------------------------------------------------------------------------------------------------------------------------------------------------------------------------------------------------------------------------------------------------------------------------------------------------------------------------------------------------------------------------------------------------------------------------------------------------------------------------------------------------------------------------------------------------------------------------------------------------------------------------------------------------------------------------------------------------------------------------------------------------------------------------------------------------------------------------------------------------------------------------------------------------------------------------------------------------------------------------------------------------------------------------------------------------------------------------------------------------------------------------------------------------------------------------------------------------------------------------------------------------------------------------------------------|----------------------------------------------------------------------------------------------------------------------------------------------------------------------------------------------------------------------------------------------------------------------------------------------------------------------------------------------------------------------------------------------------------------------------------------------------------------------------------------------------|
| <p>Can you please describe the diagnosis of the illness if you received any and where you received it?</p> <p><i>[note: the diagnosis might be given by any medical provider including untrained and informal. Record all diagnoses if more than one.]</i> ຫາກທ່ານໄດ້ຮັບການວິນິດໄສຈາກ ກຸຜາອາຫານວິນິດໄສນັ້ນແລະຮຽນແຫ່ງອື່ນໆ [ໝາຍເຫດ: ຜູ້ທີ່ສັມທານອາດຈະໄດ້ຮັບການວິນິດໄສຈາກຜູ້ໃຫ້ບໍລິການທາງສຸຂະພາບທີ່ບໍ່ມີການສຶກສາສຳນັກແພັດແລະຜູ້ໃຫ້ບໍລິການອື່ນໆ ກວດກາຜູ້ວິນິດໄສທັງໝົດ ຫາກຜູ້ໃຫ້ສັມທານໄດ້ຮັບການວິນິດໄສ ນັ້ນກວ່າ 1 ຄັ້ງ] ຖ້າຫາກທ່ານໄດ້ຮັບການວິເຄາະພະຍາດ ກະລຸນາອະທິບາຍການວິເຄາະ ພະຍາດເທື່ອນັ້ນແລະລະບຸແຫຼ່ງຂໍ້ມູນ [ໝາຍເຫດ: ຜູ້ໃຫ້ສັມທານອາດໄດ້ຮັບການວິເຄາະ ພະຍາດຈາກຜູ້ໃຫ້ບໍລິການສຸຂະພາບປະເພດໃດກໍໄດ້ ເຊິ່ງຮວມເຖິງຜູ້ໃຫ້ບໍລິການສຸຂະພາບທີ່ ບໍ່ມີການສຶກສາທາງການແພດແລະຜູ້ໃຫ້ບໍລິການນອກລະບົບ ຕໍ່ມາໃສ່ຂໍ້ມູນການວິເຄາະ ພະຍາດທັງໝົດ ຖ້າຜູ້ໃຫ້ສັມທານໄດ້ຮັບການວິເຄາະພະຍາດຫຼາຍກວ່າ 1 ຄັ້ງ]</p> <p><i>[Response codes ຮັດຄຳຕອບ ລະຫັດຄຳຕອບ]</i></p> <p>Drug dispensary, other local store selling medicine<br/>         ຮ້ານຂາຍຂອງຈຳຫນ່ວຍຮ້ານຄ້າທີ່ມີການຈຳນ່ວຍຮ້ານທົ່ວໄປທີ່ມີການຂາຍຢາ ..... 1<br/>         Traditional healer ພອກພານ ພັນຊາວບ້ານ ..... 2<br/>         Pharmacist ທາຍສັກ ຜູ້ຂາຍຢາ ..... 3<br/>         Private clinic ຄລິນິກອອກນ ຄລິນິກເອກະຊົນ ..... 4<br/>         Private hospital ຮອງພານອອກນ ຮອງພັນເອກະຊົນ ..... 5<br/>         Primary care unit ສະຖານີອາໄສຊີວິດສະຖານີອາໄສຊີວິດ ..... 6<br/>         Public hospital ຮອງພານສຳຮຽນ ຮອງພັນລັດ ..... 7<br/>         Other providers or Internet? Specify: ຜູ້ໃຫ້ບໍລິການແບບອື່ນໆ ຫຼືອອນໄລນ໌ (ໂປຣ ຈຸນ) ຜູ້ໃຫ້ບໍລິການໃນຮູບແບບອື່ນໆຫຼືອອນໄລນ໌ (ກະລຸນາບອກ) ..... 8</p> | <p>Diagnosis 1 ການວິນິດໄສ 1 ການວິເຄາະພະຍາດ 1:</p> <hr/> <p>Medical provider 1 ຜູ້ໃຫ້ບໍລິການທາງສຸຂະພາບ 1 ຜູ້ໃຫ້ບໍລິການສຸຂະພາບ 1:<br/>         1 2 3 4 5 6 7 8</p> <p>Diagnosis 2 ການວິນິດໄສ 2 ການວິເຄາະພະຍາດ 2:</p> <hr/> <p>Medical provider 2 ຜູ້ໃຫ້ບໍລິການທາງສຸຂະພາບ 2 ຜູ້ໃຫ້ບໍລິການສຸຂະພາບ 2:<br/>         1 2 3 4 5 6 7 8</p> <p>Diagnosis 3 ການວິນິດໄສ 3 ການວິເຄາະພະຍາດ 3:</p> <hr/> <p>Medical provider 3 ຜູ້ໃຫ້ບໍລິການທາງສຸຂະພາບ 3 ຜູ້ໃຫ້ບໍລິການສຸຂະພາບ 3:<br/>         1 2 3 4 5 6 7 8</p> |
| <p>When did you experience the accident/discomfort (for the first time) ທ່ານເລີ່ມມີການປ່າຍຫຼືອຸບັດຕິເຫດທັງແຕ່ເມື່ອໃດ? ທ່ານເລີ່ມມີການ ເຈັບເປັນຫຼືຖືກອຸບັດຕິເຫດທັງແຕ່ເມື່ອໃດ?</p>                                                                                                                                                                                                                                                                                                                                                                                                                                                                                                                                                                                                                                                                                                                                                                                                                                                                                                                                                                                                                                                                                                                                                                                                                                                                                                                                                                                                                           | <p>Onset: ___ days / ___ weeks / ___ months ago<br/>         ເລີ່ມມີການປ່າຍ/ອຸບັດຕິເຫດ: ___ ວັນ / ___ ສັບຕາ / ___ ເດືອນທີ່ແລ້ວ<br/>         ເລີ່ມມີການບໍ່ສະບາຍຫຼືອຸບັດຕິເຫດ: ___ ມື້ / ___ ອາທິດ / ___ ເດືອນກ່ອນ</p>                                                                                                                                                                                                                                                                               |
| <p>Would you describe the illness/accident as “mild,” “moderate,” or “severe”? ທ່ານຄິດວ່າການປ່າຍຫຼືອຸບັດຕິເຫດນັ້ນຢູ່ໃນຂັ້ນນ້ອຍ ປານ ກາງ ຫຼືອຸບັດຕິເຫດ ຫຼືອຸບັດຕິເຫດ ຫຼືອຸບັດຕິເຫດນັ້ນຢູ່ຂັ້ນນ້ອຍ, ປານ ກາງ, ຫຼືອຸບັດຕິເຫດ</p>                                                                                                                                                                                                                                                                                                                                                                                                                                                                                                                                                                                                                                                                                                                                                                                                                                                                                                                                                                                                                                                                                                                                                                                                                                                                                                                                                                               | <p>Mild ນ້ອຍ ນ້ອຍ ..... 1<br/>         Moderate ປານກາງ ປານກາງ ..... 2<br/>         Severe ພັກ ພັກ ..... 3</p>                                                                                                                                                                                                                                                                                                                                                                                      |

- Did you feel comfortable talking about your health? ທ່ານຮູ້ສຶກສະບາຍໃຈ (ຫຼືອີດອັດໃຈ) ໃນການທຸກຄູ່ເລື່ອງສຸຂະພາບຫຼືບໍ່ ສະບາຍໃຈ (ຫຼືອີດອັດໃຈ) ໃນການລົມເລື່ອງສຸຂະພາບຫຼືບໍ່
  - Do you think these questions are too hard? ທ່ານຮູ້ສຶກວ່າຄຳຕາມເລື່ອງນີ້ຍາກເກີນໄປຫຼືບໍ່ ທ່ານຮູ້ສຶກວ່າຄຳຕາມເຫຼົ່ານີ້ຍາກເກີນໄປຫຼືບໍ່
  - How do you rank mild, moderate, and severe? What do those words mean to you? ທ່ານໃຊ້ອະໄວເປັນເຄື່ອງປັບປຸງອາການ ປ່າຍຂອງທ່ານ ນ້ອຍ ປານກາງ ຫຼືອຸບັດຕິເຫດ, ໃນຄວາມຄິດຂອງທ່ານ ນ້ອຍ ປານກາງ ແລະ ພັກ ໝາຍຄວາມວ່າແນວໃດ
9. The next set of questions still relates to the same illness. ຄຳຕາມຈຸດຕໍ່ໄປຍັງຄົງເຖິງອາການປ່າຍດັ່ງກ່າວ ທ່ານກ່ອນ ຄຳຕາມຊຸດຕໍ່ ໄປຍັງກ່ຽວກັບອາການບໍ່ສະບາຍເຊັ່ນດຽວກັບຄຳຕາມກ່ອນໜ້ານີ້

OxTREC reference: 528-17

ANTIBIOTICS AND ACTIVITY SPACES

Can you please explain the stages of the treatment? I will ask you step-by-step what you did, starting from the moment you first detected the condition. กรุณาอธิบายขั้นตอนการรักษาทุกขั้นตอนระหว่างการป่วยครั้งนี้ เราขอให้คุณเล่าให้เราฟังทีละขั้นตอนตั้งแต่ท่านเริ่มรู้สึกมีอาการป่วย ภาชนะจะอธิบายขั้นตอนการป่วย ทุกขั้นตอนจะต่อรายการจับเป็นลึ้งนี้ เรือใช้ให้ท่านเล่าให้เรารู้ทีละขั้นตอนที่ต่างตอนที่ท่านเริ่มมีอาการป่วย

[ask respondent what he or she did first, then code answer and continue. After each column, ask: "What did you do next?" Only one activity per step. If e.g. medical treatment and then home care, first step is medical treatment, second step is home care. Repeat until respondent was cured or today otherwise.] [ถามคำถามเกี่ยวกับขั้นตอนการรักษาขั้นแรกสุด จากนั้นกรอกรหัสคำตอบ แล้วจึงถามคำถามต่อไป หลังจากกรอกข้อมูลในแต่ละคอลัมน์ให้ถาม "ท่านทำอะไรต่อไปหลังจากนั้น" กรอกข้อมูลของการรักษาแต่ละขั้นตอนหนึ่งขั้นตอนเท่านั้น ตัวอย่าง: "เข้าพบแพทย์แล้วรักษาอาการที่บ้าน" ให้กรอก ขั้นที่ 1 เข้าพบแพทย์ และขั้นที่ 2 รักษาอาการที่บ้าน บันทึกขั้นตอนทุกขั้นตอนเช่นนี้จนถึงขั้นที่หายจากอาการหรือจนถึงวันที่ทำการเก็บข้อมูล] [ถามคำถามเกี่ยวกับขั้นตอนการป่วยขึ้นปอดขั้นที่ 1 จากนั้นจะถามคำถามว่า "จากนั้นคุณจะทำอย่างไรต่อ" แล้วจึงถามคำถามตามต่อไป ซึ่งจากข้อมูลในแถวละช่อง ใช้คำถาม "ท่านทำอะไรต่อไปหลังจากนั้น" ข้อมูลของขั้นตอนการป่วยขึ้นปอดแต่ละชนิดที่ขึ้นตอนเดียวกัน ตัวอย่าง: "เข้าพบแพทย์แล้วขึ้นปอดในโรงพยาบาล" ใช้ข้อมูลขั้นที่ 1 เข้าพบแพทย์ และขั้นที่ 2 ปวดอาการป่วยเรื้อรัง บันทึกขั้นตอนทุกขั้นตอนแบบนี้เป็นระเบียบขั้นที่ 1 ถึงขั้นที่ 2 เท่านั้น]

|                                                                                                                                                                                                                                                      | Step 1 (detection)<br>ขั้นที่ 1 (เมื่อเริ่มรู้สึกป่วย)<br>ขั้นที่ 1 (เมื่อเริ่มมีอาการ)                                                                                                                                                                                                                                                                                                                                                                                                                                                                                                                                                                                                                                                                                                                                                                                                                                                                                                                                                                                                                                                          | Step 2<br>ขั้นที่ 2<br>ขั้นที่ 2          | [continue until Step x when discomfort was cured or until today] [บันทึกขั้นตอนทุกขั้นตอนในตารางนี้ ตั้งแต่เริ่มป่วยจนถึงขั้นที่หายจากอาการหรือจนถึงวันที่ทำการเก็บข้อมูล] [บันทึกขั้นตอนการขึ้นปอดในตารางนี้ให้ท่านเริ่มจับเป็นเงินเงินตามระเบียบขั้นที่ 1 ถึงขั้นที่ 2 เท่านั้น] |
|------------------------------------------------------------------------------------------------------------------------------------------------------------------------------------------------------------------------------------------------------|--------------------------------------------------------------------------------------------------------------------------------------------------------------------------------------------------------------------------------------------------------------------------------------------------------------------------------------------------------------------------------------------------------------------------------------------------------------------------------------------------------------------------------------------------------------------------------------------------------------------------------------------------------------------------------------------------------------------------------------------------------------------------------------------------------------------------------------------------------------------------------------------------------------------------------------------------------------------------------------------------------------------------------------------------------------------------------------------------------------------------------------------------|-------------------------------------------|------------------------------------------------------------------------------------------------------------------------------------------------------------------------------------------------------------------------------------------------------------------------------------|
| a) What kind of help or treatment did you get at this stage? ท่านมีการรักษาในขั้นตอนนี้อย่างไร ท่านมีการขึ้นปอดในขั้นตอนนี้แบบใด<br><br>[if unsure, specify] [หากไม่แน่ใจให้กรอกรายละเอียดในหมวด อื่นๆ] [ถ้าไม่แน่ใจให้กรอกรายละเอียดในหมวด "อื่นๆ"] | Ignored /did nothing ละเลย/ไม่ทำอะไร ไม่สนใจ/ไม่รักษาเลย. 1<br>Self-care (sleep, rest, medicine at home) รักษาตัวเอง (นอนหลับ, พักผ่อน, ใช้ยาที่บ้าน) ปวดกินเอง (นอน, ฝึกฝน, ใช้ยาที่มีอยู่) เรื้อรัง ..... 2<br>Care from family and friends (full-time) ได้รับการรักษาจากครอบครัวหรือเพื่อน (ตลอดเวลา) ได้รับการขึ้นปอดจากครอบครัว (เฉพาะเวลา) ..... 3<br>Treated/consulted at a pharmacist รับการรักษา/คำปรึกษาจากเภสัชกร รับการขึ้นปอด/คำปรึกษาจากผู้ขายยา ..... 4<br>Treated/consulted at shop selling drugs รับการรักษา/คำปรึกษาจากร้านขายของชำหรือร้านค้าทั่วไปที่มีการจำหน่ายยา รับการขึ้นปอด/คำปรึกษาจากร้านทั่วไปที่มีการขายยา ..... 5<br>Treated/consulted at priv. clinic/hospital รับการรักษา/คำปรึกษาจากคลินิก/โรงพยาบาลเอกชน รับการขึ้นปอด/คำปรึกษาจากรากลินิก/โรงพยาบาลเอกชน ..... 6<br>Treated/consulted at primary care unit รับการรักษา/คำปรึกษาจากสถานีอนามัยของรัฐ รับการขึ้นปอด/คำปรึกษาจากรากสถานีอนามัยของรัฐ ..... 7<br>Treated/consulted at a gvt. Hospital รับการรักษา/คำปรึกษาจากโรงพยาบาลของรัฐ รับการขึ้นปอด/คำปรึกษาจากรากโรงพยาบาลของรัฐ ..... 8<br>Other (specify) อื่นๆ (โปรดระบุ) อื่นๆ (ภาชนะบออก) _ ..... 9 | 1<br>2<br>3<br>4<br>5<br>6<br>7<br>8<br>9 | 1<br>2<br>3<br>4<br>5<br>6<br>7<br>8<br>9                                                                                                                                                                                                                                          |

OxTREC reference: 528-17

ANTIBIOTICS AND ACTIVITY SPACES

|                                                                                                                                                                                                                                                                                                                                                                                                                                                                                                        |                                                                                                                                                                                                                                                                                                                                                                                                                                                                                                                                                                                                                                                                                                                                                                                                                                                                                                                                                                                                          |                                                                                                                                                                                                     |                                                                                                                 |
|--------------------------------------------------------------------------------------------------------------------------------------------------------------------------------------------------------------------------------------------------------------------------------------------------------------------------------------------------------------------------------------------------------------------------------------------------------------------------------------------------------|----------------------------------------------------------------------------------------------------------------------------------------------------------------------------------------------------------------------------------------------------------------------------------------------------------------------------------------------------------------------------------------------------------------------------------------------------------------------------------------------------------------------------------------------------------------------------------------------------------------------------------------------------------------------------------------------------------------------------------------------------------------------------------------------------------------------------------------------------------------------------------------------------------------------------------------------------------------------------------------------------------|-----------------------------------------------------------------------------------------------------------------------------------------------------------------------------------------------------|-----------------------------------------------------------------------------------------------------------------|
| <p>b) Where did this activity take place?<br/>                 ພື້ນທີ່ການກວດກາທີ່ເກີດຂຶ້ນທີ່ໃກ້ ຂັ້ນຕອນການປິ່ນປົວນີ້<br/>                 ເກີດຂຶ້ນຢູ່ໃສ</p>                                                                                                                                                                                                                                                                                                                                            | <p>At home ທີ່ບ້ານ ຢູ່ເຮືອນ ..... 1<br/>                 Less than 10 min. from home ນ້ອຍກວ່າ 10 ນາທີຈາກບ້ານ ນ້ອຍກວ່າ<br/>                 10 ນາທີຈາກເຮືອນ ..... 2<br/>                 10 to 29 min. 10 ລື່ມ 29 ນາທີຈາກບ້ານ 10 ຫາ 29 ນາທີຈາກເຮືອນ<br/>                 ..... 3<br/>                 30 to 59 min. 30 ລື່ມ 59 ນາທີຈາກບ້ານ 30 ຫາ 59 ນາທີຈາກເຮືອນ<br/>                 ..... 4<br/>                 60 to 119 min. 60 ລື່ມ 119 ນາທີຈາກບ້ານ 60 ຫາ 119<br/>                 ນາທີຈາກເຮືອນ ..... 5<br/>                 2 hours or more from home 2 ສົ່ງໂມງຫຼືຫຼາຍກວ່ານັ້ນ ສອງ<br/>                 ຊົ່ວໂມງຫຼືຫຼາຍກວ່າ ..... 6</p>                                                                                                                                                                                                                                                                                                                                                             | <p>1<br/>2<br/>3<br/>4<br/>5<br/>6</p>                                                                                                                                                              | <p>1<br/>2<br/>3<br/>4<br/>5<br/>6</p>                                                                          |
| <p>c) How did you get to the place of the activity?<br/>                 ທ່ານເດີນທາງໄປສູ່ບ່ອນທີ່ທ່ານເຮັດການກວດກາໃນ<br/>                 ພື້ນທີ່ນີ້ແນວໃດ ທ່ານເດີນທາງໄປສະຖານທີ່ທີ່ ປິ່ນ<br/>                 ປົວໃນຂັ້ນຕອນນີ້ແນວໃດ<br/>                 [select "at home" according to prior<br/>                 responses ເລືອກ "ທີ່ບ້ານ" ທີ່ສອດຄ້ອງກັບຄຳຕອບກ່ອນ<br/>                 ພ້ອມທັງເຂົ້າຮ່ວມຜູ້ທີ່] [ເລືອກ "ຢູ່ເຮືອນ" ທີ່<br/>                 ສອດຄ້ອງ ກັບຄຳຕອບກ່ອນໜ້າທາງກ່ຽວຂ້ອງກັບ]</p>     | <p>At home ທີ່ບ້ານ ຢູ່ເຮືອນ ..... 1<br/>                 Walk ເດີນທ່າ ຢ່າງ ..... 2<br/>                 Own bicycle ຈັກຂາຍຂອງທ່ານ ລົດຖີບຂອງທ່ານ ..... 3<br/>                 Own motorcycle / Three-wheeler ຮົດຈັກຂາຍຂອງທ່ານ/ຮົດສາມລໍ້າຂອງ<br/>                 ທ່ານລົດຈັກ/ລົດສາມລໍ້າຂອງທ່ານ ..... 4<br/>                 Own car / four-wheeler ຮົດຍົນ/ຈັກຂີນ/ຈັກຂີນສີ່ລໍ້າຂອງທ່ານ ລົດຍົນ/ລົດ<br/>                 ໃຫຍ່ສີ່ລໍ້າຂອງທ່ານ ..... 5<br/>                 Taxi or other hired ride ຮົດເທິກ/ຮົດຮັບຈ້າງ ລົດເທິກຊີ/ລົດຮັບຈ້າງ<br/>                 ..... 6<br/>                 Public transport ຈົນສົ່ງສາທາລະນະ ລົດຂົນສົ່ງສາທາລະນະ ..... 7<br/>                 Other (specify) ອື່ນໆ (ໂປຣຕຣະນຸ) ອື່ນໆ (ກະລຸນາບອກ) _ ..... 8</p>                                                                                                                                                                                                                                                                 | <p>1<br/>2<br/>3<br/>4<br/>5<br/>6<br/>7<br/>8</p>                                                                                                                                                  | <p>1<br/>2<br/>3<br/>4<br/>5<br/>6<br/>7<br/>8</p>                                                              |
| <p>d) How long did this stage last?<br/>                 ທ່ານກວດກາ<br/>                 ໃນພື້ນທີ່ນີ້ເປັນເວລາເທົ່າໃດ ທ່ານປິ່ນປົວໃນຂັ້ນ<br/>                 ຕອນນີ້ເປັນເວລາເທົ່າໃດ<br/>                 [let respondent choose category; if less<br/>                 than one day, code "1" day] [ໃຫ້ຜູ້ທີ່ສັມກາຍ<br/>                 ເລືອກໜ່ວຍເວລາ ຫາກນ້ອຍກວ່າໜຶ່ງວັນໃຫ້ຕອກ "1" ວັນ]<br/>                 [ໃຫ້ຜູ້ໃຫ້ສຳມາດເລືອກໜ່ວຍເວລາເອງ ຖ້າບໍ່ອຍກ<br/>                 ວາໜຶ່ງມື້ໃຫ້ຂຽນ "1" ມື້]</p> | <p>Duration ສະເໝີ ໄລຍະເວລາ:<br/>                 ___ days ວັນ ມື້<br/>                 ___ weeks ສັບລາດ ອາທິດ<br/>                 ___ months ເດືອນ ເດືອນ</p>                                                                                                                                                                                                                                                                                                                                                                                                                                                                                                                                                                                                                                                                                                                                                                                                                                            | <p>___ days<br/>                 ວັນ ມື້<br/>                 ___ weeks<br/>                 ສັບລາດ<br/>                 ອາທິດ<br/>                 ___ months<br/>                 ເດືອນ ເດືອນ</p> | <p>___ days ວັນ ມື້<br/>                 ___ weeks ສັບລາດ ອາທິດ<br/>                 ___ months ເດືອນ ເດືອນ</p> |
| <p>e) Why did you seek this<br/>                 advice/treatment?<br/>                 ເພາະເຫຼົ່າໃດທ່ານຈຶ່ງເລືອກກິນ/<br/>                 ຮັບຄຳແນະນຳນີ້ ເປັນຫຍັງທ່ານຈຶ່ງເລືອກການປິ່ນປົວ/<br/>                 ຮັບຄຳແນະນຳນີ້<br/>                 [Mark all that apply] [ຕອບໄດ້ຫຼາຍກວ່າ 1 ສ່ວນເລືອກ]<br/>                 [ຕອບໄດ້ຫຼາຍກວ່າ 1 ຕົວເລືອກ]</p>                                                                                                                                              | <p>This is the normal choice ເປັນສິ່ງທີ່ທ່ານຄິດ ເປັນແນວປະຕິບັດ<br/>                 ປົກກະຕິ ..... 1<br/>                 Advice from others ເປັນຄຳແນະນຳຈາກຄົນອື່ນ ເປັນຄຳແນະນຳຈາກຄົນ<br/>                 ອື່ນ ..... 2<br/>                 Too busy for alternatives ບໍ່ມີເວລາເລືອກອື່ນ ບໍ່ມີທາງເລືອກ<br/>                 ອື່ນເນື່ອງຈາກບໍ່ມີເວລາ ..... 3<br/>                 No access to money/transportation ບໍ່ມີເງິນເຮືອນ ບໍ່ມີທາງ<br/>                 ເດີນທາງ ມີບັນຫາກ່ຽວກັບເງິນເຮືອນ ຫຼື ເດີນທາງ ..... 4<br/>                 Ran out of medicines ຫາທີ່ໃຊ້ຢູ່ຫມົດ ຫາທີ່ໃຊ້ຢູ່ຫມົດ ..... 5<br/>                 Not feeling better ພາບການກວດກາດີຂຶ້ນແລ້ວ ບໍ່ມີທາງ ປິ່ນປົວໂດຍວິທີ<br/>                 ອື່ນແລ້ວບໍ່ດີຂຶ້ນ ..... 6<br/>                 New/more serious symptoms ອາການໜັກໜ່ວຍກວ່າເກົ່າ ຫຼື ອາການອື່ນ<br/>                 ນຳກາງ ອາການໜັກໜ່ວຍກວ່າເກົ່າ ຫຼື ອາການອື່ນ ນຳກາງ ເພີ່ມຂຶ້ນ ..... 7<br/>                 Other (specify) ອື່ນໆ (ໂປຣຕຣະນຸ) ອື່ນໆ (ກະລຸນາບອກ) _ ..... 8</p> | <p>1<br/>2<br/>3<br/>4<br/>5<br/>6<br/>7<br/>8</p>                                                                                                                                                  | <p>1<br/>2<br/>3<br/>4<br/>5<br/>6<br/>7<br/>8</p>                                                              |

OxTREC reference: 528-17

ANTIBIOTICS AND ACTIVITY SPACES

|                                                                                                                                                                                                                                                                                                                                                                                                                                                                                                                                                                                                                                                                                                                                                                                                                                                                                                                                                                                         |                                                                                                                                                                                                                                                                      |                                                                                                                                              |                                                                                                                                              |
|-----------------------------------------------------------------------------------------------------------------------------------------------------------------------------------------------------------------------------------------------------------------------------------------------------------------------------------------------------------------------------------------------------------------------------------------------------------------------------------------------------------------------------------------------------------------------------------------------------------------------------------------------------------------------------------------------------------------------------------------------------------------------------------------------------------------------------------------------------------------------------------------------------------------------------------------------------------------------------------------|----------------------------------------------------------------------------------------------------------------------------------------------------------------------------------------------------------------------------------------------------------------------|----------------------------------------------------------------------------------------------------------------------------------------------|----------------------------------------------------------------------------------------------------------------------------------------------|
| <p>f) Can you please name or describe all the medicines that you received or were prescribed during this step? กรุณาระบุชื่อหรืออธิบายลักษณะของยาทั้งหมดที่ท่านได้รับจากการรักษาขั้นตอนนี้ ภาะลุมยาออกฤทธิ์อะนติไบยาติกสละระะຂອງຢາທີ່ທ່ານໄດ້ຮັບຈາກການປິ່ນປົວຂັ້ນຕອນນີ້</p> <p>[leave blank if no medicine received]<br/>[include medicine stored at home if "self-care at home"] [continue for all medicines received, then complete Questions g to k for each medicine individually] [เว้นช่องว่างหากผู้ให้สัมภาษณ์ไม่ได้รับยาจากการรักษาในขั้นตอนนี้] [รวมถึงยาที่มีเก็บไว้ที่บ้านด้วยหากผู้ให้สัมภาษณ์รักษาตัวเองอยู่ที่บ้าน] [บันทึกยาทุกชนิดที่ผู้ให้สัมภาษณ์ได้รับ จากนั้นกรอกข้อมูลในคำถาม g ถึง k สำหรับยาแต่ละชนิด] [จึงขอร้องให้อาสาสมัครที่ใช้สำเนาฉบับนี้ได้รับยาจากภาาานປິ່ນປົວໃນຂັ້ນຕອນນີ້] [รวมยาที่มีเก็บอยู่เรือนด้วย หากอาสาสมัครที่ใช้สำเนาฉบับนี้เองอยู่เรือน] [บันทึกยาทุกชนิดที่ใช้สำเนาฉบับนี้รับ จากนั้นเริ่มຂໍ້ມູນໃສ່ໃນຄໍາຖາມ g ເຖິງ k ສໍາລັບຢາແຕ່ລະຊະນິດ]</p> | <p>Medicine 1 ທາຂນິດທີ່ 1 ຢາຊະນິດທີ່ 1:<br/>Name/description ຊື່/ຄໍາອະທິບາຍ: _____</p> <p>Medicine 2 ທາຂນິດທີ່ 2 ຢາຊະນິດທີ່ 2:<br/>Name/description ຊື່/ຄໍາອະທິບາຍ: _____</p> <p>Medicine 3 ທາຂນິດທີ່ 3 ຢາຊະນິດທີ່ 3:<br/>Name/description ຊື່/ຄໍາອະທິບາຍ: _____</p> | <p>Medicine 1<br/>1 ທາຂນິດທີ່ 1 ຢາຊະນິດທີ່ 1<br/>Medicine 2<br/>2 ທາຂນິດທີ່ 2 ຢາຊະນິດທີ່ 2<br/>Medicine 3<br/>3 ທາຂນິດທີ່ 3 ຢາຊະນິດທີ່ 3</p> | <p>Medicine 1<br/>1 ທາຂນິດທີ່ 1 ຢາຊະນິດທີ່ 1<br/>Medicine 2<br/>2 ທາຂນິດທີ່ 2 ຢາຊະນິດທີ່ 2<br/>Medicine 3<br/>3 ທາຂນິດທີ່ 3 ຢາຊະນິດທີ່ 3</p> |
| <p>[for each medicine individually] [สำหรับยาแต่ละชนิด] [สำหรับยาแต่ละชนิด]</p> <p>g) For how long did you take the medicine? ท่านใช้ยาชนิดนี้อยู่นานเท่าใด ท่านใช้ยาชนิดนี้กี่วันกี่สัปดาห์<br/>[let respondent choose category; if more than one repeated episode, indicate total duration] [ให้ผู้ที่ให้สัมภาษณ์เลือกหน่วยเวลาเอง หากมีการใช้ยาตัวเดียวกันหลายครั้ง ให้ผู้สัมภาษณ์รวมระยะเวลาทั้งหมด] [ให้ผู้ใช้ใช้สำเนาเลือกหน่วยเวลาเอง หากมีการใช้ยาตัวเดียวกันหลายครั้ง ให้ผู้สัมภาษณ์รวมระยะเวลาทั้งหมด] [ให้ผู้ใช้ใช้สำเนาเลือกหน่วยเวลาเอง หากมีการใช้ยาตัวเดียวกันหลายครั้ง ให้ผู้สัมภาษณ์รวมระยะเวลาทั้งหมด]</p>                                                                                                                                                                                                                                                                                                                                                            | <p>Duration ກະຫວາດ ໄລຍະເວລາ:<br/>_____ days ວັນ ມື້<br/>_____ weeks ສັປລາທ໌ ອາທິດ<br/>_____ months ເດືອນ ເດືອນ</p>                                                                                                                                                   | <p>_____ days<br/>_____ weeks<br/>_____ months</p>                                                                                           | <p>_____ days ວັນ ມື້<br/>_____ weeks ສັປລາທ໌ ອາທິດ<br/>_____ months ເດືອນ ເດືອນ</p>                                                         |
| <p>h) How often per day did you take the medicine? ท่านใช้ยาชนิดนี้วันละกี่ครั้ง ท่านใช้ยาชนิดนี้กี่วัน<br/>[calculate into daily use according to respondent's chosen frequency] [คำนวณเป็นจำนวนครั้งต่อวันจากคำตอบของผู้ให้สัมภาษณ์] [คำนวณเป็นจำนวนครั้งต่อวันจากคำตอบของผู้ให้สัมภาษณ์]</p>                                                                                                                                                                                                                                                                                                                                                                                                                                                                                                                                                                                                                                                                                         | <p>Frequency ຄວາມຕື່ ຄວາມຕື່: _____ times daily ຄັ້ງຕໍ່ວັນ ເທື່ອຕໍ່ມື້</p>                                                                                                                                                                                           | <p>_____ times daily<br/>_____ times daily</p>                                                                                               | <p>_____ times daily<br/>_____ times daily</p>                                                                                               |

OxTREC reference: 528-17

ANTIBIOTICS AND ACTIVITY SPACES

|                                                                                                                                                                                                                                                                                                                                                                                                  |                                                                                                                                                                                                                                                                                                                  |                                                                                                                                                                                                             |                                                                                                                                                                       |
|--------------------------------------------------------------------------------------------------------------------------------------------------------------------------------------------------------------------------------------------------------------------------------------------------------------------------------------------------------------------------------------------------|------------------------------------------------------------------------------------------------------------------------------------------------------------------------------------------------------------------------------------------------------------------------------------------------------------------|-------------------------------------------------------------------------------------------------------------------------------------------------------------------------------------------------------------|-----------------------------------------------------------------------------------------------------------------------------------------------------------------------|
| <p>i) What dosage did you normally take? ท่านใช้ยาชนิดนี้ในปริมาณเท่าใดครั้ง/ท่านใช้ยาชนิดนี้ปริมาณเท่าใดครั้ง/ท่านใช้ยาชนิดนี้ปริมาณเท่าใดครั้ง/ท่านใช้ยาชนิดนี้ปริมาณเท่าใดครั้ง</p> <p><i>[let respondent choose category according to type of medicine]</i> [ให้ผู้ที่สัมภาษณ์เลือกหมวดหมู่ปริมาณยา โดยขึ้นอยู่กับชนิดของยา]</p> <p><i>[ให้ผู้ใช้ให้สำเนาเลือกหน่วยปริมาณยาเอง]</i></p>      | <p>Dosage ปริมาณ ความถี่:</p> <p>___ tablets / capsules<br/>เม็ด/แคปซูล เม็ด/แคปซูล</p> <p>___ drops (for liquid medicine)<br/>หยด (สำหรับยาน้ำ) หยด (สำหรับยาน้ำ)</p> <p>___ spoons (for liquid medicine)<br/>ช้อน (สำหรับยาน้ำ) ช้อน (สำหรับยาน้ำ)</p> <p>per time administered ครั้งที่ใช้ ต่อครั้งที่ให้</p> | <p>tablets เม็ด<br/>เม็ด<br/>drops หยด<br/>ช้อน</p>                                                                                                                                                         | <p>___ tablets เม็ด เม็ด<br/>___ drops หยด หยด<br/>___ spoons ช้อน ช้อน</p>                                                                                           |
| <p>j) Did you take the medicine exactly as it was recommended to you by the person who prescribed/sold them? ท่านใช้ยาชนิดนี้ตามคำแนะนำของผู้สั่งจ่าย/จำหน่ายหรือไม่/ท่านใช้ยาชนิดนี้ตามคำแนะนำจากผู้ขายยาหรือไม่</p>                                                                                                                                                                            | <p>Yes ใช่ ..... 1<br/>No ไม่ใช่ ..... 2<br/>Did not receive advice ไม่ได้รับคำแนะนำ ..... 9<br/>Don't know ไม่รู้ ..... 99</p>                                                                                                                                                                                  | <p>1<br/>2<br/>9<br/>99</p>                                                                                                                                                                                 | <p>1<br/>2<br/>9<br/>99</p>                                                                                                                                           |
| <p>k) Did you finish the medicine? ท่านใช้ยาชนิดนี้จนหมดหรือไม่</p>                                                                                                                                                                                                                                                                                                                              | <p>Yes ใช่ ..... 1<br/>No ไม่ใช่ ..... 2</p>                                                                                                                                                                                                                                                                     | <p>1<br/>2</p>                                                                                                                                                                                              | <p>1<br/>2</p>                                                                                                                                                        |
| <p>Have you now recovered from the illness/accident? ท่านฟื้นตัวจากอาการป่วย/อุบัติเหตุแล้วหรือไม่</p>                                                                                                                                                                                                                                                                                           |                                                                                                                                                                                                                                                                                                                  | <p>Yes ใช่ ..... 1<br/>No ไม่ใช่ ..... 2</p>                                                                                                                                                                |                                                                                                                                                                       |
| <p>Was anybody of your personal relationships involved in providing advice or help during the illness? ท่านได้รับการปรึกษาหรือความช่วยเหลือในด้านการดูแลสุขภาพจากบุคคลที่เกี่ยวข้องกับท่านระหว่างการป่วยหรือไม่</p> <p><i>[record up to ten names]</i> [กรอกชื่อของบุคคลที่มีความเกี่ยวข้องระหว่างอาการป่วยไม่เกิน 10 คน] [ระบุชื่อของบุคคลที่มีความเกี่ยวข้องระหว่างอาการป่วยไม่เกิน 10 คน]</p> |                                                                                                                                                                                                                                                                                                                  |                                                                                                                                                                                                             |                                                                                                                                                                       |
|                                                                                                                                                                                                                                                                                                                                                                                                  | <p>a) What is the name of the person? ชื่อ</p>                                                                                                                                                                                                                                                                   | <p>b) How is this person related to you? ความสัมพันธ์กับท่าน</p> <p><i>[give examples if respondent is unsure about answer categories]</i> [หากผู้ให้สัมภาษณ์ไม่แน่ใจในหมวดคำตอบ ให้ยกตัวอย่างคำตอบได้]</p> | <p>c) What kind of support was provided? ท่านได้รับความช่วยเหลือจากบุคคลนี้อย่างไร</p> <p><i>[mark all that apply]</i> [ตอบได้มากกว่า 1 ตัวเลือก] [ตอบได้หลายข้อ]</p> |

OxTREC reference: 528-17

ANTIBIOTICS AND ACTIVITY SPACES

|                                                                                                                                                                                                                                                                     |                    |                                                                                                                                                                                                                                                                                                                                                                                                                                                                                                                                                                     |                                                                                                                                                                                                                                                                                                                                                                                                                                                                                                                                                                                                                                                                                                                                                                                                                                                                                                                                                                                                             |
|---------------------------------------------------------------------------------------------------------------------------------------------------------------------------------------------------------------------------------------------------------------------|--------------------|---------------------------------------------------------------------------------------------------------------------------------------------------------------------------------------------------------------------------------------------------------------------------------------------------------------------------------------------------------------------------------------------------------------------------------------------------------------------------------------------------------------------------------------------------------------------|-------------------------------------------------------------------------------------------------------------------------------------------------------------------------------------------------------------------------------------------------------------------------------------------------------------------------------------------------------------------------------------------------------------------------------------------------------------------------------------------------------------------------------------------------------------------------------------------------------------------------------------------------------------------------------------------------------------------------------------------------------------------------------------------------------------------------------------------------------------------------------------------------------------------------------------------------------------------------------------------------------------|
| <p>Contact 1 คนที่ 1 ถิ่นที่ 1</p>                                                                                                                                                                                                                                  | <p>Name ชื่อ 姓</p> | <p>Spouse คู่สมรส คู่แต่งงาน ..... 1<br/>                 Parent บิดมารดา แม่ ..... 2<br/>                 Child บุตร ลูก ..... 3<br/>                 Sibling พี่น้อง อัยม้อง ..... 4<br/>                 Other relative ญาติ พี่น้องอื่น ๆ ..... 5<br/>                 Neighbour เพื่อนบ้าน เพื่อนบ้าน ..... 6<br/>                 Friend (if not neighbour) เพื่อน (ที่ไม่ใช่เพื่อนบ้าน) ..... 7<br/>                 Other villager ชาวบ้านคนอื่น ๆ ญาติบ้านอื่น ..... 8<br/>                 Other (specify) อื่นๆ (โปรดระบุ) อื่นๆ (กรุณาระบุ) ..... 9</p> | <p>Providing healthcare/attending ให้การรักษา/การดูแล<br/>                 ใช้บริการเว็ยแยะง..... 11<br/>                 Providing advice ให้คำปรึกษา ใช้ตำปึกษา ..... 12<br/>                 Providing medicine ให้ยา ใช้ยา ..... 13<br/>                 Lending/granting money ให้หรือให้ยืมเงิน<br/>                 ใช้ยืมใช้ยืมเงิน..... 21<br/>                 Transportation/Lending vehicle ยานพาหนะ/การยืมยานพาหนะ ..... 22<br/>                 Contacting family/friends ติดต่อครอบครัว/เพื่อน ญาติ ..... 23<br/>                 Providing food สนับสนุนอาหาร<br/>                 สะทบับสะทบุบอาหาร ..... 31<br/>                 Helping with children/housework ช่วยดูแลลูกหลาน/งานบ้าน ..... 32<br/>                 Helping with jobs/agriculture work (feeding animals/tending crops/covering shifts, etc.) ช่วยเหลือเกี่ยวกับอาชีพ/การเกษตร (ช่วยดูแลสัตว์เลี้ยง/งานเพาะปลูก/ทำงานแทน) ..... 33<br/>                 Other (specify) อื่นๆ (โปรดระบุ) อื่นๆ (กรุณาระบุ) ..... 99</p> |
| <p>Contact 2 คนที่ 2 ถิ่นที่ 2</p>                                                                                                                                                                                                                                  | <p>Name ชื่อ 姓</p> | <p>1 2 3 4 5 6 7 8 9</p>                                                                                                                                                                                                                                                                                                                                                                                                                                                                                                                                            | <p>11 12 13 21 22 23 31 32 33 99</p>                                                                                                                                                                                                                                                                                                                                                                                                                                                                                                                                                                                                                                                                                                                                                                                                                                                                                                                                                                        |
| <p>[continue until Contact x – maximum 10 contacts] [บันทึกบุคคลที่มี<br/>                 ความเกี่ยวข้องกับอาการเจ็บป่วยทุกคน ไม่เกิน 10 คน]<br/>                 [บันทึกบุคคลที่มีความเกี่ยวข้อง<br/>                 ทางการแพทย์ช่วยดูแล บัญชีรายชื่อ 10 คน]</p> | <p>Name ชื่อ 姓</p> | <p>1 2 3 4 5 6 7 8 9</p>                                                                                                                                                                                                                                                                                                                                                                                                                                                                                                                                            | <p>11 12 13 21 22 23 31 32 33 99</p>                                                                                                                                                                                                                                                                                                                                                                                                                                                                                                                                                                                                                                                                                                                                                                                                                                                                                                                                                                        |

- a. Do you think these questions are too hard? ท่านรู้สึกว่าการถามเหล่านี้ยากเกินไปหรือไม่ ท่านรู้สึกว่าการถามเหล่านี้ยากเกินไปหรือไม่
  - b. Did you find it tedious to go through the illness in such detail? เป็นเรื่องน่าเบื่อหรือไม่ที่ท่านต้องอธิบายอาการป่วยของท่านโดยละเอียด เป็นเรื่องน่าเบื่อหรือไม่ที่ท่านต้องอธิบายอาการป่วยของท่านโดยละเอียด
  - c. How well do you remember the medicines that you used during that illness? ท่านสามารถจดจำยาที่ท่านใช้ระหว่างอาการป่วยได้ดีเพียงใด ท่านสามารถจำยาที่ท่านใช้ระหว่างอาการป่วยได้ดีเพียงใด
  - d. Did you think about anything in particular to help you recall the medicines? ท่านนึกถึงอะไรเป็นพิเศษเพื่อช่วยในการทวนความจำเกี่ยวกับยาเหล่านี้ ท่านนึกถึงสิ่งใดเป็นพิเศษเพื่อช่วยในการทวนความจำเกี่ยวกับยาเหล่านี้
  - e. How do you indicate that the symptoms are cured? Would you stop taking medicines then? What if the doctor’s instruction is to complete the dose? ท่านสามารถบอกได้อย่างไรว่าอาการป่วยของท่านหายแล้ว หากอาการป่วยของท่านหายแล้วท่านจะหยุดรับประทานยาทันทีหรือไม่ หากแพทย์แนะนำให้ท่านใช้ยาจนหมดต่ออาการของท่านหายแล้วท่านจะปฏิบัติตามคำสั่งแพทย์หรือไม่ ท่านสามารถบอกได้แน่นอนว่าอาการเจ็บป่วยของท่านดีแล้ว ถ้าอาการเจ็บป่วยของท่านดี ท่านจะหยุดกินยาทันทีหรือไม่ ถ้าเช่นนั้นท่านจะใช้ยาจนหมดต่ออาการของท่านดีแล้วท่านจะปฏิบัติตามคำสั่งแพทย์หรือไม่
10. The next question deals with medicine. Could you please tell me what is going through your mind while you are answering the question? คำถามต่อไปจะเป็นคำถามเกี่ยวกับยาที่เราขอให้ท่านบอกเราว่าท่านนึกถึงอะไรระหว่างการตอบคำถามเหล่านี้ คำถามต่อไปจะเป็นคำถามเกี่ยวกับยาที่เราขอให้ท่านบอกเราว่าท่านนึกถึงอะไรระหว่างการตอบคำถามเหล่านี้



OxTREC reference: 528-17

ANTIBIOTICS AND ACTIVITY SPACES

**Part V – Household-Related Survey Questions ส่วนที่ 5 – คำถามเกี่ยวกับครัวเรือน ส่วนที่ 5 - คำถามเกี่ยวกับครัวเรือน**

Thank you. We now come to the last part. ขอขอบคุณครับ/ค่ะ ส่วนต่อไปเป็นส่วนสุดท้ายของการสัมภาษณ์ ขอใจ ส่วนนี้เป็นส่วนสุดท้ายของงานสำเนา

11. The following questions relate to your household. คำถามต่อไปนี้นี้เป็นคำถามเกี่ยวกับครัวเรือนของท่าน คำถามต่อไปนี้เกี่ยวกับครัวเรือนของบ้านคุณ

| I will now ask you for some items in your household. Please tell me... ต่อไปเราจะถามท่านเกี่ยวกับสิ่งของที่ท่านครอบครองในครัวเรือน ต่อไปเราจะถามเกี่ยวกับสิ่งของที่อยู่ในครัวเรือน                                                                                                     |       | Number of items in household <b>จำนวนของสิ่งของที่มีภายในครัวเรือน</b> จำนวนของสิ่งของที่มีภายในครัวเรือน: |
|----------------------------------------------------------------------------------------------------------------------------------------------------------------------------------------------------------------------------------------------------------------------------------------|-------|------------------------------------------------------------------------------------------------------------|
| Have you got a <b>functioning radio</b> in your household? If so, how many? <b>ท่านมีวิทยุที่ใช้งานได้</b> ในครัวเรือนของท่านหรือไม่ ถ้ามี ที่เครื่อง <b>ท่านมีวิทยุที่ใช้งานได้</b> ในครัวเรือนของท่านหรือไม่ ถ้ามี ที่เครื่อง                                                        | _____ | _____                                                                                                      |
| Have you got a <b>functioning TV</b> in your household? If so, how many? <b>ท่านมีโทรทัศน์ที่ใช้งานได้</b> ในครัวเรือนของท่านหรือไม่ ถ้ามี ที่เครื่อง <b>ท่านมีโทรทัศน์ที่ใช้งานได้</b> ในครัวเรือนของท่านหรือไม่ ถ้ามี ที่เครื่อง                                                     | _____ | _____                                                                                                      |
| Have you got a <b>functioning rice cooker</b> in your household? If so, how many? <b>ท่านมีหม้อหุงข้าวที่ใช้งานได้</b> ในครัวเรือนของท่านหรือไม่ ถ้ามี ที่เครื่อง <b>ท่านมีหม้อหุงข้าวที่ใช้งานได้</b> ในครัวเรือนของท่านหรือไม่ ถ้ามี ที่เครื่อง                                      | _____ | _____                                                                                                      |
| Have you got a <b>functioning landline telephone</b> in your household? If so, how many? <b>ท่านมีโทรศัพท์บ้านที่ใช้งานได้</b> ในครัวเรือนของท่านหรือไม่ ถ้ามี ที่เครื่อง <b>ท่านมีโทรศัพท์บ้านที่ใช้งานได้</b> ในครัวเรือนของท่านหรือไม่ ถ้ามี ที่เครื่อง                             | _____ | _____                                                                                                      |
| Have you got a <b>functioning mobile phone</b> in your household? If so, how many? <b>ท่านมีโทรศัพท์มือถือที่ใช้งานได้</b> ในครัวเรือนของท่านหรือไม่ ถ้ามี ที่เครื่อง <b>ท่านมีโทรศัพท์มือถือที่ใช้งานได้</b> ในครัวเรือนของท่านหรือไม่ ถ้ามี ที่เครื่อง                               | _____ | _____                                                                                                      |
| Have you got a <b>functioning computer</b> in your household? If so, how many? <b>ท่านมีคอมพิวเตอร์ที่ใช้งานได้</b> ในครัวเรือนของท่านหรือไม่ ถ้ามี ที่เครื่อง <b>ท่านมีคอมพิวเตอร์ที่ใช้งานได้</b> ในครัวเรือนของท่านหรือไม่ ถ้ามี ที่เครื่อง                                         | _____ | _____                                                                                                      |
| Have you got a <b>functioning bicycle</b> in your household? If so, how many? <b>ท่านมีรถจักรยานที่ใช้งานได้</b> ในครัวเรือนของท่านหรือไม่ ถ้ามี ที่คัน <b>ท่านมีรถจักรยานที่ใช้งานได้</b> ในครัวเรือนของท่านหรือไม่ ถ้ามี ที่คัน                                                      | _____ | _____                                                                                                      |
| Have you got a <b>functioning scooter, motorcycle, or tricycle</b> in your household? If so, how many? <b>ท่านมีจักรยานยนต์หรือรถสามล้อที่ใช้งานได้</b> ในครัวเรือนของท่านหรือไม่ ถ้ามี ที่คัน <b>ท่านมีจักรยานยนต์หรือรถสามล้อที่ใช้งานได้</b> ในครัวเรือนของท่านหรือไม่ ถ้ามี ที่คัน | _____ | _____                                                                                                      |
| Have you got a <b>functioning car or truck</b> in your household? If so, how many? <b>ท่านมีรถยนต์ รถกระบะ หรือรถบรรทุกที่ใช้งานได้</b> ในครัวเรือนของท่านหรือไม่ ถ้ามี ที่คัน <b>ท่านมีรถยนต์ รถกระบะ หรือรถบรรทุกที่ใช้งานได้</b> ในครัวเรือนของท่านหรือไม่ ถ้ามี ที่คัน             | _____ | _____                                                                                                      |
| Have you got a <b>functioning tractor</b> in your household? If so, how many? <b>ท่านมีรถแทรกเตอร์หรือรถไถ</b> ในครัวเรือนของท่านหรือไม่ ถ้ามี ที่คัน <b>ท่านมีรถแทรกเตอร์หรือรถไถ</b> ในครัวเรือนของท่านหรือไม่ ถ้ามี ที่คัน                                                          | _____ | _____                                                                                                      |
| Have you got a <b>functioning refrigerator or freezer</b> in your household? If so, how many? <b>ท่านมีตู้เย็นหรือตู้แช่แข็งที่ใช้งานได้</b> ในครัวเรือนของท่านหรือไม่ ถ้ามี ที่ตู้ <b>ท่านมีตู้เย็นหรือตู้แช่แข็งที่ใช้งานได้</b> ในครัวเรือนของท่านหรือไม่ ถ้ามี ที่ตู้              | _____ | _____                                                                                                      |

- a. Do you feel comfortable (or uncomfortable) recalling these points for your household? **ท่านรู้สึกสบายใจ (หรืออึดอัดใจ) ในการนึกถึงหัวข้อของเครื่องใช้เหล่านี้ในครัวเรือนของท่านหรือไม่ ท่านรู้สึกสบายใจ (หรืออึดอัดใจ) ในการนึกถึงหัวข้อเหล่านี้ในครัวเรือนของท่านหรือไม่**
- b. Are there some common household items that you normally see in your village? **มีสิ่งของเครื่องใช้ที่เรากล่าวมาข้างต้นเป็นสิ่งที่คนในหมู่บ้านนี้ใช้กันทั่วไปหรือไม่**
- c. How would you distinguish whether somebody in your village is wealthy or not? **อย่างไรจึงจะบอกได้ว่าใครบางคนในหมู่บ้านนี้รวยหรือไม่**
