# Supplementary material for: Antibiotic knowledge, attitudes and practices: new insights from cross-sectional rural health behaviour surveys in low-income and middle-income South-East Asia
Source: PubMed Central journal article supplement (PMC6707701; doi:10.1136/bmjopen-2018-028224), 2019-08-20
Supplement: bmjopen-2018-028224supp004.pdf [file bmjopen-2018-028224supp004.pdf]

1 **Appendix**2 **Appendix Table 1. Provincial-level estimates of rural surveys in Chiang Rai and Salavan.**

|                                                                      | Chiang Rai        | Salavan           | X <sup>2</sup> / z-score |
|----------------------------------------------------------------------|-------------------|-------------------|--------------------------|
| <b>Demographics</b>                                                  |                   |                   |                          |
| Number                                                               | 1158              | 983               | ..                       |
| Female <sup>a</sup>                                                  | 51.3% (44.9–57.6) | 50.9% (47.0–54.9) | 0.01                     |
| Age <sup>a</sup>                                                     | 46 (13)           | 37 (20)           | 10.83***                 |
| Education (years)                                                    | 6.3 (4.5)         | 4.4 (5.5)         | 2.10**                   |
| Speaking Thai / Lao                                                  | 92.4% (89.9–94.2) | 93.6% (91.9–94.9) | 0.88                     |
| Wealth index                                                         | 0.7 (0.1)         | 0.4 (0.2)         | 13.12***                 |
| Buddhist religion                                                    | 81.9% (77.4–85.7) | 67.5% (61.7–72.9) | 16.85***                 |
| Thai/Lao nationality                                                 | 95.0% (93.1–96.4) | 98.8% (97.7–99.4) | 18.50***                 |
| Majority ethnic group (Thai/Lao Loum)                                | 65.2% (59.6–70.4) | 56.2% (49.9–62.2) | 4.73**                   |
| <b>Antibiotic knowledge / attitudes</b>                              |                   |                   |                          |
| Number                                                               | 1158              | 983               | ..                       |
| Aware of antibiotics                                                 | 95.7% (94.0–96.9) | 86.4% (83.6–88.7) | 41.47***                 |
| Aware of drug resistance <sup>b</sup>                                | 74.8% (71.1–78.2) | 62.5% (58.1–66.7) | 18.80***                 |
| Would not buy antibiotics over the counter                           | 57.0% (52.7–61.1) | 27.7% (24.6–31.0) | 115.03***                |
| Prefers antibiotics over alternatives                                | 61.8% (57.9–65.5) | 24.8% (21.1–29.0) | 151.35***                |
| Does not keep antibiotics for future use                             | 57.1% (53.1–61.0) | 16.2% (13.2–19.8) | 201.30***                |
| Knows that antibiotic resistance can spread                          | 9.1% (7.2–11.5)   | 3.4% (2.1–5.5)    | 15.09***                 |
| Answer score (0 to 4)                                                | 1.8 (0.9)         | 0.7 (1.0)         | 17.13***                 |
| <b>Illness episodes<sup>c</sup></b>                                  |                   |                   |                          |
| Number                                                               | 608               | 356               | ..                       |
| Self-rated severity (1=mild, 2=medium, 3=severe)                     | 1.6 (0.7)         | 1.8 (0.8)         | 2.43**                   |
| Duration of illness episode (days)                                   | 6.8 (7.1)         | 6.5 (7.9)         | 0.82                     |
| <b>Treatment-seeking behaviour<sup>c</sup></b>                       |                   |                   |                          |
| Number                                                               | 608               | 356               | ..                       |
| Public healthcare provider                                           | 29.0% (24.8–33.7) | 44.8% (37.8–52.0) | 14.17***                 |
| Private healthcare providers                                         | 25.0% (20.5–30.1) | 23.8% (17.8–31.0) | 0.08                     |
| Informal healthcare provider                                         | 8.5% (6.1–11.8)   | 6.9% (3.9–11.8)   | 0.45                     |
| Care from family or self-care                                        | 88.8% (84.3–92.2) | 93.2% (88.3–96.1) | 2.27                     |
| Other types of healthcare access                                     | 0.3% (0.1–1.4)    | 6.0% (2.8–12.3)   | 23.43***                 |
| <b>Medicine use episodes per illness<sup>c</sup></b>                 |                   |                   |                          |
| Number                                                               | 608               | 356               | ..                       |
| Medicine use episodes                                                | 2.2 (1.7)         | 2.5 (2.3)         | 1.96**                   |
| Non-antibiotic medicine use episodes                                 | 1.6 (1.2)         | 1.3 (1.4)         | 1.98**                   |
| Antibiotic use episodes                                              | 0.2 (0.5)         | 0.4 (0.7)         | 3.51***                  |
| Potential antibiotic use episodes                                    | 0.4 (0.9)         | 0.9 (1.8)         | 4.32***                  |
| Antibiotic use episodes per illness from public sources              | 0.1 (0.3)         | 0.1 (0.4)         | 0.78                     |
| Antibiotic use episodes per illness from private sources             | 0.1 (0.3)         | 0.2 (0.5)         | 1.65*                    |
| Antibiotic use episodes per illness from informal sources            | 0.0 (0.2)         | 0.1 (0.4)         | 1.69*                    |
| Antibiotic / potential antibiotic use episodes from public sources   | 0.3 (0.8)         | 0.3 (1.1)         | 0.57                     |
| Antibiotic / potential antibiotic use episodes from private sources  | 0.2 (0.6)         | 0.7 (1.5)         | 3.11***                  |
| Antibiotic / potential antibiotic use episodes from informal sources | 0.1 (0.3)         | 0.2 (0.7)         | 2.33**                   |

3 Source: Authors' analysis of survey data.

4 Notes: Population-weighted statistics, accounting for complex survey design. Not applicable categories indicated with “..” Group  
5 comparison using X<sup>2</sup> tests for binary and Wilcoxon rank-sum tests for non-normally distributed variables.

6 \*p &lt; 0.1, \*\*p &lt; 0.05, \*\*\*p &lt; 0.01.

7 a. Due to population weighting, samples reflect the same sex and age profiles as the respective censuses.

8 b. Comparing Thai “due yah” with the combined Lao “due yah” and “lueng yah.”

9 c. Completed illnesses experienced by respondent or child under their supervision, excluding incomplete episodes.
